# Supplementary material for: Population-Specific Structural Variant Landscape in a Puerto Rican Rare Disease Cohort
Source: Research Square preprint supplement (doi:10.21203/rs.3.rs-8544782/v1), 2026-02-24
Supplement: Supplementary file 1 [file 09598f57292f5e68044f914a.xlsx]

## Sheet: contents
SAMPLE	EXAMPLE	CONTENT
sample	PUR1P	sample id
sex	F	sex
anc	PUR	ancestry
hpo	HP:0001251	clinical phenotype
COVERAGE
sample	EUR7P	sample id
chr1	99.3556	mean coverage at chromosome
…		continued
DEPTH
sample	EUR7P	sample id
chr1	28.4685	mean depth at chromosome
…		continued
COUNTS
sample	EUR7P	sample id
population	EUR	ancestry
del_count	17587	count of called deletions
dup_count	163	count of called duplications
ins_count	12162	count of called insertions
inv_count	30	count of called inversions
total_sv_count	29942	sum of counts
snv_count	706482	total snv count
REGIONS
region	chrX_pericent_q	chromosome region sv intersects, can be CDS, 5'UTR,3'UTR,INTRONIC, INTERGENIC
chromosome	X	chromosome where sv is located
region_type	q	chromosome region where sv is located
total_sv	207	total sv count at region
eur_mean_del	4.2	EUR mean del count at region
pur_mean_del	6.07	PUR mean del count at region
del_difference	1.9	difference in mean
del_ratio	1.4452	mean ratio of PUR to EUR
del_log2_ratio	0.5313	log2 of ratio
...		continued for other sv types
total_eur_sv	7.2	EUR sum of sv counts at region
total_pur_sv	12.21	PUR sum of sv counts at region
total_sv_difference	5.01	difference of sum
sv_ratio	1.696	ration of sum
sv_log2_ratio	0.762	log2 ratio of sv sum
del_median_eur	5	median count of del in EUR
del_median_pur	6	median count of del in PUR
del_p	0.0748	mann-whitney pvalue of median difference
del_q	0.266	fdr corrected mann-whitney pvalue of median difference
…		continued for other sv types
total_sv_median_eur	6	median count of total SVs in EUR
total_sv_median_pur	10	median count of total SVs in PUR
total_sv_p	0.1696	mann-whitney pvalue of median difference
total_sv_q	0.3575	fdr corrected mann-whitney pvalue of median difference
total_snv	4752	total snv count
eur_mean_snv	58	EUR mean snv counts at region
pur_mean_snv	370.33	PUR mean snv counts at region
CLUSTERING_COORDINATES
sample	EUR7P	sample id
role	Proband	trio identity
population	EUR	ancestry
snv_pc1	0.261993	snv pca pc1
snv_pc2	-0.265054	snv pca pc2
snv_pc3	-0.0627967	snv pca pc3
sv_pc1	0.0713997	sv pca pc1
sv_pc2	-0.0379906	sv pca pc2
sv_pc3	0.0173609	sv pca pc3
CLUSTERING_RELATEDNESS
snv_sample_a	EUR7P	snv sample id
snv_sample_b	EUR7M	snv compared sample id
snv_relatedness	0.36	snv relatedness score
sv_sample_a	EUFRP	sv sample id
sv_sample_b	EUFRM	sv compared sample id
sv_relatedness	0.768322	sv relatedness score
CLUSTERING_SVS
chrom	chr1	sv located on chromosome
pos	11669	starting breakpoint
end	11729	ending breakpoint
svtype	DEL	canonical sv type
svlen	59	length of sv
af	0.451613	allele frequency in cohort
DELETIONS
chrom	chr3	sv located on chromosome
start	190201143	starting breakpoint
end	190201207	ending breakpoint
length	64	length of sv
caf_pur	0.6667	carrier frequency in cohort
caf_eur	0.0444	carrier frequency in cohort
count_pur	30	count of samples with sv
count_eur	2	count of samples with sv
caf_pvalue	2.91e-10	significance pvalue (fisher)
odds_ratio	43.0515	ratio
gnomad_amr_cf	NA	gnomad carrier frequency for amr
gnomad_nfe_cf	NA	gnomad carrier frequency for nfe
gene	ABC1	intersecting genes
cds	1	intersecting gene region CDS count
5_utr	0	intersecting gene region 5'UTR count
3_utr	1	intersecting gene region 3'UTR count
intronic	3	intersecting gene region intron count
…		continued
ANNOTATIONS
sample_id	PUR1P	proband sample id
ancestry	PUR	ancestry
hpo_terms	HP:0001251	HPOs associated with sample id
hpo_count	13	count of HPOs associated with sample id
chr	chr1	chromosome of sv coordinates
start	10287937	starting breakpoint of sv
end	10287938	ending breakpoint of sv
sv_type	INS	sv type
length	264	length of sv
quality	360	quality of sv call
genes	CASZ1	genes sv interesects
regions	0,0,0,2	gene region sv intersects, can be CDS, 5'UTR,3'UTR,INTRONIC, INTERGENIC
genotype	0/1	proband genotype
mother	./.	mother genotype
father	./.	father genotype
region_class	INTRON	top region intersected
mei_class	Alu_like	mobile element insertion identity
window_z_mean	1.17399	mean z of LoF constraint score windows intersected by sv (gnomad v2)
gene_lofzs	7.5695	gene LoF z score (gnomad v4)
HI_category	LittleEvidence	ClinGen haploinsufficiency category
gene_lof_mean	7.5695	mean gene LoF z score (gnomad v4)

## Sheet: sample
sample	sex	anc	hpo
PUR1P	F	PUR	HP:0001251,HP:0001257,HP:0001269,HP:0001290,HP:0001332,HP:0002073,HP:0002301,HP:0003394,HP:0007340,HP:0011099,HP:0040292,HP:0040293,HP:0100034
PUR1M	F	PUR	Unaffected
PUR1F	M	PUR	Unaffected
PUR2P	M	PUR	HP:0000256,HP:0000271,HP:0000465,HP:0000473,HP:0000646,HP:0000750,HP:0001249,HP:0001770,HP:0001771,HP:0001873,HP:0007018,HP:0008551,HP:0008572,HP:0010499,HP:0011442
PUR2M	F	PUR	Unaffected
PUR2F	M	PUR	Unaffected
PUR3P	F	PUR	HP:0000518,HP:0000717,HP:0001382,HP:0001903
PUR3M	F	PUR	Unaffected
PUR3F	M	PUR	Unaffected
PUR4P	M	PUR	HP:0000486,HP:0001251,HP:0001263,HP:0004322,HP:0006970,HP:0100021
PUR4M	F	PUR	Unaffected
PUR4F	M	PUR	Unaffected
PUR5P	F	PUR	HP:0000739,HP:0001251,HP:0001257,HP:0001332,HP:0002015,HP:0002098,HP:0002321,HP:0002883,HP:0012332,HP:0030834,HP:0100749
PUR5M	F	PUR	Unaffected
PUR5F	M	PUR	Unaffected
PUR6P	M	PUR	HP:0000252,HP:0000508,HP:0000750,HP:0000957,HP:0001067,HP:0001319,HP:0001357,HP:0001508,HP:0002194,HP:0004305,HP:0008936
PUR6M	F	PUR	Unaffected
PUR6F	M	PUR	Unaffected
PUR7P	F	PUR	HP:0001290,HP:0003198,HP:0003201,HP:0003215,HP:0003236,HP:0009020,HP:0012514
PUR7M	F	PUR	Unaffected
PUR7F	M	PUR	Unaffected
PUR8P	M	PUR	HP:0000098,HP:0000421,HP:0000768,HP:0001382,HP:0003549,HP:0031869
PUR8M	F	PUR	Unaffected
PUR8F	M	PUR	Unaffected
PUR9P	M	PUR	HP:0002650,HP:0003201
PUR9M	F	PUR	Unaffected
PUR9F	M	PUR	Unaffected
PUR10P	M	PUR	HP:0000750,HP:0001250,HP:0001290,HP:0001328,HP:0007018
PUR10M	F	PUR	Unaffected
PUR10F	M	PUR	Unaffected
PUR11P	F	PUR	HP:0001873,HP:0003077,HP:0025230
PUR11M	F	PUR	Unaffected
PUR11F	M	PUR	Unaffected
PUR12P	F	PUR	HP:0001290,HP:0001324,HP:0002315,HP:0003198
PUR12M	F	PUR	Unaffected
PUR12F	M	PUR	Unaffected
PUR13P	M	PUR	HP:0001263,HP:0001324,HP:0001394
PUR13M	F	PUR	Unaffected
PUR13F	M	PUR	Unaffected
PUR14P	F	PUR	HP:0000717,HP:0000739,HP:0000750,HP:0001249,HP:0001257,HP:0001290,HP:0001324,HP:0001328,HP:0007018,HP:0010862
PUR14M	F	PUR	Unaffected
PUR14F	M	PUR	Unaffected
PUR15P	F	PUR	HP:0000717,HP:0001250,HP:0001324,HP:0001629,HP:0011451
PUR15M	F	PUR	Unaffected
PUR15F	M	PUR	Unaffected
EUR7P	M	EUR	HP:0000252,HP:0001250,HP:0001257,HP:0001263,HP:0012443
EUR7M	F	EUR	Unaffected
EUR7F	M	EUR	Unaffected
EUR13P	M	EUR	HP:0002415,HP:0008167
EUR13M	F	EUR	Unaffected
EUR13F	M	EUR	Unaffected
EUR6P	M	EUR	HP:0000252,HP:0000308,HP:0000431,HP:0000506,HP:0000518,HP:0000541,HP:0000568,HP:0000618,HP:0001250,HP:0001290,HP:0001317,HP:0001342,HP:0002033,HP:0004968,HP:0006893,HP:0007968,HP:0010636,HP:0410030,HP:3000063
EUR6M	F	EUR	Unaffected
EUR6F	M	EUR	Unaffected
EUR11P	M	EUR	HP:0000086,HP:0000969,HP:0001290,HP:0001561,HP:0001622,HP:0001629,HP:0001776,HP:0002089,HP:0002108,HP:0002202
EUR11M	F	EUR	Unaffected
EUR11F	M	EUR	Unaffected
EUR12P	M	EUR	HP:0000473,HP:0000717,HP:0001263,HP:0001357,HP:0004474
EUR12M	F	EUR	Unaffected
EUR12F	M	EUR	Unaffected
EUR8P	M	EUR	HP:0002415
EUR8M	F	EUR	Unaffected
EUR8F	M	EUR	Unaffected
EUR4P	M	EUR	HP:0000365,HP:0002415
EUR4M	F	EUR	Unaffected
EUR4F	M	EUR	Unaffected
EUR3P	M	EUR	HP:0000739,HP:0002072,HP:0002527
EUR3M	F	EUR	Unaffected
EUR3F	M	EUR	Unaffected
EUR1P	M	EUR	HP:0001250,HP:0001257,HP:0001298,HP:0001332,HP:0002415
EUR1M	F	EUR	Unaffected
EUR1F	M	EUR	Unaffected
EUR15P	F	EUR	HP:0000256,HP:0001305,HP:0001651,HP:0001714,HP:0002119,HP:0004736,HP:0005316,HP:0030658,HP:0030707,HP:0200012
EUR15M	F	EUR	Unaffected
EUR15F	M	EUR	Unaffected
EUR2P	M	EUR	HP:0000717,HP:0007018
EUR2M	F	EUR	Unaffected
EUR2F	M	EUR	Unaffected
EUR14P	M	EUR	HP:0000154,HP:0000219,HP:0000248,HP:0000283,HP:0000303,HP:0000322,HP:0000327,HP:0000426,HP:0000490,HP:0000494,HP:0000739,HP:0001249,HP:0001263,HP:0001761,HP:0002020,HP:0002123,HP:0002317,HP:0002870,HP:0004406,HP:0006313,HP:0007018,HP:0009765,HP:0010677,HP:0011833,HP:0025267,HP:0040080,HP:0040180,HP:0100633
EUR14M	F	EUR	Unaffected
EUR14F	M	EUR	Unaffected
EUR9P	M	EUR	HP:0002667
EUR9M	F	EUR	Unaffected
EUR9F	M	EUR	Unaffected
EUR10P	F	EUR	HP:0000750,HP:0007441,HP:0009720,HP:0100898
EUR10M	F	EUR	Unaffected
EUR10F	M	EUR	Unaffected
EUR5P	M	EUR	HP:0000717,HP:0001250
EUR5M	F	EUR	Unaffected
EUR5F	M	EUR	Unaffected

## Sheet: coverage
sample	chr1	chr2	chr3	chr4	chr5	chr6	chr7	chr8	chr9	chr10	chr11	chr12	chr13	chr14	chr15	chr16	chr17	chr18	chr19	chr20	chr21	chr22	chrX	chrY
EUR7P	99.3556	99.8645	99.3833	97.9493	99.472	98.6148	99.9034	99.59	94.5124	99.9112	99.7846	99.9543	93.7501	99.1807	98.0133	97.1068	95.9158	99.8632	99.7249	99.8996	97.6579	97.0918	99.5348	86.4038
EUR7M	99.0535	99.907	99.4029	99.4473	99.4108	98.6407	99.8813	99.5753	92.3221	99.8768	99.8201	99.7664	96.0046	97.7559	98.7162	96.6909	99.3281	99.7891	99.287	98.5431	97.1696	96.6705	99.572	4.09004
EUR7F	99.1184	99.8175	99.8918	98.2424	99.6279	98.7228	99.9091	99.5599	95.8416	99.7717	99.7111	99.9474	94.7412	99.5021	98.2845	98.1621	98.8751	99.7975	98.9355	99.8993	95.787	97.9655	99.415	85.7169
EUR13P	99.1634	99.8437	99.669	99.7609	99.6723	99.5725	99.8958	99.6933	95.3101	99.6394	99.8469	99.9656	96.5999	98.8831	96.6931	96.9289	95.9679	99.703	99.3156	98.708	98.3073	99.4563	99.5718	73.4609
EUR13M	99.1167	99.8262	99.6383	98.2454	99.9427	99.819	99.783	99.8203	94.6785	99.8123	99.7891	99.9367	97.7174	99.453	95.9676	97.4229	98.0726	99.5541	99.7136	99.0058	98.3651	98.3415	99.7568	4.27358
EUR13F	99.1327	99.7983	99.7116	99.768	99.6657	99.5655	99.8985	99.7169	95.7072	99.8011	99.7772	99.9548	95.481	98.7137	97.1642	98.17	99.2011	99.7976	98.3927	98.9414	99.0554	95.733	99.3197	73.0878
EUR6P	98.3177	99.7861	99.6674	98.3308	99.8886	98.7065	99.8915	99.2195	96.8798	99.6699	99.8894	99.7919	94.7961	99.3611	99.0566	97.6162	98.8662	99.7876	99.389	98.9945	98.5085	99.2476	99.4698	82.9001
EUR6M	99.5547	99.8581	99.6277	99.7396	99.6873	98.7526	99.8774	99.5666	96.5436	99.6676	99.8245	99.9585	96.0864	99.4765	98.7779	96.9522	98.7741	99.8814	99.7561	98.7989	96.0089	99.0254	99.7508	4.23091
EUR6F	99.0497	99.7638	99.5291	98.3822	99.8917	98.6652	99.5875	99.8553	95.1257	99.8966	99.8982	99.9524	93.9185	99.5521	96.2553	96.5164	98.9389	99.7918	99.1003	99.1194	99.0187	98.4333	99.5946	81.5297
EUR11P	99.3488	99.8215	99.8602	98.4108	99.558	98.7268	99.9108	99.2392	96.8193	99.6795	99.8506	99.9564	96.2778	98.6642	97.5007	96.4821	99.2844	99.8707	99.8989	99.3073	97.9329	98.9919	99.5776	82.3649
EUR11M	99.1773	99.8796	99.6534	98.2188	99.5554	99.846	99.89	99.4406	96.1928	99.6445	99.923	99.8822	96.5352	99.5301	97.4174	97.8901	99.2284	99.3631	99.8095	98.0868	99.3081	98.198	99.6938	4.26996
EUR11F	99.4633	99.828	99.8293	98.3043	99.901	98.793	99.9241	99.7684	97.4991	99.584	99.7232	99.964	96.367	98.7848	97.1553	97.9369	98.8856	99.791	99.7842	99.4222	95.9157	99.321	99.4796	82.5071
EUR12P	99.5389	99.8932	99.8392	98.2836	99.6002	98.6849	99.8409	99.592	96.5164	99.6556	99.9325	99.8961	94.94	99.6778	98.7394	98.3958	99.4597	99.9015	99.8085	98.6837	99.2134	97.1038	99.374	90.5062
EUR12M	99.5808	99.9607	99.2533	98.1307	99.5299	98.663	99.7984	99.6269	95.4443	99.6878	99.9201	99.8397	94.251	99.568	96.9807	98.1166	99.1167	99.8794	99.3428	98.8078	98.7991	97.2356	99.7021	4.16114
EUR12F	99.4367	99.9273	99.8009	98.3341	99.5551	98.7262	99.9199	99.6936	96.5945	99.6494	99.9102	99.8378	94.75	99.6883	98.5958	97.6575	98.6732	99.8507	99.8451	98.8436	96.3243	93.3824	99.4889	86.4798
EUR8P	99.5924	99.8752	99.7986	99.8944	99.8551	99.8642	99.7785	99.6487	95.6479	99.8863	99.8187	99.9665	97.4064	99.0334	98.3881	98.5348	99.696	99.8625	99.6924	98.7949	98.7569	98.2314	99.5241	87.7644
EUR8M	99.3065	99.8174	99.7206	99.6767	99.5696	98.7418	99.8859	99.4981	95.7336	99.8888	99.8382	99.9565	97.0531	98.8241	99.1451	96.0514	99.409	99.8718	99.6822	98.7616	97.3807	99.4396	99.7356	4.269
EUR8F	99.3752	99.8206	99.9246	99.7177	99.9371	99.8346	99.6508	99.6085	92.7022	99.8941	99.8511	99.9364	96.1725	97.4598	97.5011	98.022	99.3688	99.8538	99.7112	98.2651	97.7996	96.6559	98.7925	85.6906
EUR4P	98.822	99.5345	98.8241	97.5059	99.3076	98.4624	99.6849	99.3512	90.6079	99.639	99.4315	99.8507	92.4263	97.6404	95.4527	95.0704	95.5001	99.1347	98.1652	96.7982	95.172	94.8927	98.7931	76.7482
EUR4M	98.6205	99.5948	98.5524	97.5315	99.6643	98.8809	99.4245	99.2259	89.081	99.512	99.4476	99.8978	91.8667	98.1095	95.0943	93.985	95.4365	98.7464	98.3865	97.0411	95.6095	90.8402	99.4068	4.1348
EUR4F	95.2939	99.4068	98.4455	97.5065	99.4179	98.4148	99.2529	99.2619	87.3605	99.0094	99.08	99.5428	91.1081	97.431	91.7876	90.6164	96.4812	98.3281	96.7483	96.3827	93.4393	91.9434	98.6799	70.124
EUR3P	98.2665	99.7165	99.7146	98.215	99.5853	99.5532	99.6363	99.4071	93.9632	99.7641	99.8477	99.8134	95.4906	98.8713	98.7821	97.4529	99.4098	99.4773	99.8029	97.9402	97.7093	98.0954	99.4605	85.0025
EUR3M	99.4601	99.7897	99.6927	98.311	99.6207	99.5666	99.7843	99.6997	95.5016	99.8251	99.8929	99.841	94.3683	99.6939	99.002	97.3073	99.0449	98.8592	99.7948	98.831	98.2096	98.6148	99.5205	4.13693
EUR3F	99.1033	99.766	99.6061	99.7711	99.6251	98.6495	99.9236	99.3801	95.3388	99.762	99.8901	99.8651	95.2267	99.3098	98.8717	98.6701	98.5596	99.869	99.6644	98.3442	95.9279	98.3686	99.6013	86.4214
EUR1P	99.6444	99.7955	99.6084	99.7866	99.6087	98.5663	99.7566	99.4622	94.6964	99.8755	99.7883	99.9422	95.6812	99.1605	97.5314	97.716	98.8772	99.8155	99.6772	98.4572	97.181	99.5376	99.5003	85.3284
EUR1M	99.334	99.7753	99.6754	99.8095	99.9148	99.8292	99.8312	99.644	95.9663	99.8891	99.8448	99.9406	94.8159	99.209	97.5506	98.197	99.0583	99.8215	99.7397	97.3839	96.9495	98.7996	99.5523	4.15239
EUR1F	99.5897	99.8529	99.3576	98.3459	99.8447	98.5846	99.797	99.3586	93.596	99.6607	99.9004	99.9337	96.8818	99.2164	97.5688	97.3443	96.0733	99.6622	99.8188	98.6625	93.5568	98.1445	99.6133	85.7794
PUR1P	98.7497	99.6187	99.7215	99.3414	99.3848	99.7871	99.6414	99.2584	91.5125	99.1298	99.5572	99.7247	96.1657	96.3668	95.3053	96.3825	98.5707	99.4004	98.1447	98.5815	95.277	93.4538	99.3348	3.62639
PUR1M	99.6057	99.8085	99.8616	99.687	99.5002	99.876	99.9073	99.6393	96.8524	99.9156	99.8773	99.933	96.5668	99.2753	96.9794	98.2871	98.6456	99.7397	99.8454	98.847	99.3142	97.5267	99.7419	4.30984
PUR1F	99.3491	99.747	99.8622	99.1164	99.6648	99.8643	99.7653	99.6743	96.9036	99.76	99.8839	99.9501	95.3771	97.2654	98.2967	98.7403	99.5665	99.8637	99.5852	99.345	96.7851	97.3874	98.9671	88.3164
PUR2P	99.5361	99.8389	99.2664	99.1033	99.5575	99.8932	99.8862	99.6533	96.4415	99.8864	99.8688	99.7661	95.0232	99.2263	98.451	97.0568	99.5721	99.7355	99.6934	98.2031	96.6871	91.847	99.5908	88.3844
PUR2M	99.3248	99.8417	99.506	99.3976	99.6987	99.8278	99.9008	99.6746	95.7616	99.6551	99.9313	99.9612	95.7121	99.0606	98.8702	97.8227	99.6707	99.8174	99.6739	99.5031	97.5801	93.5759	99.6926	4.04753
PUR2F	99.772	99.7813	99.4961	99.756	99.6442	99.9217	99.9157	99.6447	96.7609	99.8983	99.8855	99.8709	96.0953	99.6078	98.6293	97.2897	99.1588	99.3393	99.7994	98.3734	99.2345	95.7422	99.4561	88.8576
PUR3P	99.3714	99.8324	99.7583	99.5748	99.7459	98.6097	99.7209	99.1787	96.4535	99.6615	99.903	99.6483	95.7049	99.6005	98.387	97.7023	98.5686	99.8298	99.7978	98.9557	97.6048	95.4072	99.5629	4.10724
PUR3M	99.3382	99.927	99.8856	99.4475	99.9435	98.6649	99.8665	99.2605	95.9358	99.6612	99.9351	99.8651	96.5618	99.3093	98.4872	98.3202	98.6508	99.6887	99.7006	99.0448	98.5131	97.7683	99.8017	4.29256
PUR3F	99.1737	99.8102	99.7137	99.7428	99.9219	98.5972	99.8927	99.6002	95.4495	99.5232	99.7741	99.6908	97.324	99.4337	98.4625	97.0027	96.0389	99.7102	99.853	98.6656	97.5769	94.6756	99.0397	86.5992
PUR4P	99.5927	99.7965	99.4853	98.2259	99.4576	99.9051	99.9087	99.6521	96.9165	99.8248	99.9159	99.9504	95.5533	99.1826	97.7054	98.1366	98.5678	99.5755	99.3605	98.8422	97.2198	97.4278	99.5819	79.0989
PUR4M	99.5271	99.878	99.9318	98.3492	99.5425	99.8693	99.8455	99.5886	98.0307	99.8723	99.788	99.9552	96.399	98.2499	98.4733	98.1348	99.4079	99.3601	99.5962	98.9595	97.9904	97.7134	99.5941	4.24
PUR4F	99.624	99.8712	99.7934	99.5592	99.4935	98.6065	99.7848	99.4483	95.5791	99.6686	99.8883	99.8049	94.2987	99.3075	98.4287	96.0603	99.0946	99.3083	99.578	99.7829	96.5089	96.1537	98.8832	78.5715
PUR5P	99.607	99.7989	99.7969	98.2814	99.6709	98.5513	99.9067	99.5161	96.2337	99.6676	99.8174	99.8134	97.6317	97.6726	99.324	98.4062	99.5116	99.8137	99.5527	98.6523	97.2494	97.1248	99.5252	4.19365
PUR5M	99.6983	99.8798	99.5369	98.2934	99.6815	98.6801	99.925	99.6504	95.3559	99.6775	99.848	99.8779	98.2035	99.0336	97.7171	98.5036	99.3357	99.1157	99.8023	98.6991	98.3982	97.6325	99.59	4.26274
PUR5F	99.7061	99.8031	99.7891	98.4134	99.7145	99.8741	99.9187	99.6569	97.063	99.708	99.9038	99.8352	95.6659	98.0829	99.3898	97.836	99.0939	99.7661	99.5044	98.032	97.6918	99.3215	99.394	88.1848
PUR6P	99.613	99.8051	99.897	98.3268	99.8856	98.7161	99.763	99.6463	97.5174	99.8835	99.9311	99.9278	98.0438	99.6359	99.4091	97.2444	99.5153	99.8602	98.8201	98.8152	95.9556	99.0354	99.5086	88.8451
PUR6M	99.8536	99.8552	99.1721	98.3417	99.6828	98.6208	99.8063	99.3856	97.4226	99.7196	99.943	99.9508	97.5027	99.7034	99.3637	95.4261	99.527	99.7656	99.8362	98.6977	96.3272	98.8681	99.6934	4.33983
PUR6F	99.494	99.8476	99.8501	99.6697	99.8811	98.7532	99.8639	99.5041	96.0282	99.8877	99.9464	99.8813	95.358	99.3409	97.1333	98.5361	98.7489	98.7884	97.8363	98.8039	96.7325	99.4993	99.6531	89.332
EUR15P	99.3442	99.8358	99.6145	99.5216	99.6354	98.6716	99.9064	99.1795	95.8058	99.657	99.9485	99.8727	98.3575	97.6966	98.8626	98.7025	98.397	99.4679	99.2377	98.9478	95.8613	98.4509	99.6842	4.19181
EUR15M	99.4092	99.8495	99.6948	99.6399	99.6301	98.6648	99.9054	99.7419	94.5789	99.6654	99.8188	99.8714	98.8328	99.5815	97.7503	98.0103	99.8387	99.8342	99.383	99.1521	96.6233	98.1832	99.6965	4.30381
EUR15F	99.7134	99.8724	99.7223	98.3915	99.9045	98.6016	99.9278	99.2142	96.8029	99.8604	99.9327	99.7979	98.5647	99.5896	97.7084	98.7251	99.6703	98.7798	99.5928	98.7228	97.3727	96.8971	99.3429	76.3828
EUR2P	99.5789	99.9332	99.3941	99.6194	99.873	98.6085	99.6265	99.4088	95.5071	99.8741	99.7582	99.9371	97.9162	99.5658	97.1212	97.8374	99.0432	99.416	99.5363	98.5116	97.3481	98.4482	99.2951	88.7349
EUR2M	99.3875	99.9338	99.3353	99.8385	99.8782	98.6135	99.6449	99.6147	95.2406	99.8992	99.9191	99.8486	97.7813	99.2129	98.0864	96.2525	98.414	99.215	99.15	97.3219	97.4677	98.6689	99.5221	4.27314
EUR2F	99.2725	99.7539	99.5619	99.8448	99.661	98.6634	99.6944	98.9456	97.0284	99.6829	99.758	99.9508	97.5683	99.4545	97.6223	97.368	98.7707	99.7224	99.7487	99.274	98.6223	97.7324	99.4693	88.7259
PUR7P	99.5215	99.8019	99.363	98.2482	99.6052	99.9167	99.9284	99.6686	94.921	99.7642	99.7688	99.8905	95.9084	99.4132	98.9572	98.7545	99.165	99.8056	99.8563	98.8534	97.9608	98.9279	99.669	4.16728
PUR7M	99.3266	99.7901	99.8721	98.2994	99.5224	98.675	99.88	99.5606	93.6926	99.5915	99.718	99.8393	96.0813	98.2431	98.0827	97.9509	98.9019	98.5252	99.7938	98.4263	95.8352	95.9368	99.5493	4.15278
PUR7F	99.373	99.7742	99.95	98.2748	99.6785	99.9014	99.916	99.6317	92.7928	99.8538	99.8838	99.9519	95.2992	99.2855	98.6647	98.4625	99.3945	99.7651	99.7329	98.8222	96.5957	97.7025	99.4165	96.9844
PUR8P	99.2436	99.9507	99.7787	98.4171	99.7388	98.6374	99.8661	99.7002	97.5654	99.913	99.9148	99.9166	95.4735	99.7103	97.9735	97.9804	99.1305	99.2301	99.6758	99.439	98.4422	98.8205	99.1293	89.8285
PUR8M	99.5853	99.9362	99.7217	99.6166	99.7221	98.685	99.8189	99.0951	95.1397	99.7018	99.8459	99.8786	95.3015	99.1095	98.0249	97.0278	99.3696	99.5387	99.4576	99.7871	99.4046	97.5768	99.5955	4.3489
PUR8F	99.3757	99.7738	99.8191	99.8204	99.5517	98.6888	99.9154	99.7215	98.548	99.8736	99.9207	99.9583	95.776	99.2149	97.8184	97.7659	96.5944	99.1878	97.7578	98.9637	99.5559	97.8197	99.4176	88.3175
PUR9P	99.6803	99.9371	99.6947	98.1683	99.7124	98.6772	99.927	99.5696	98.4079	99.8074	99.86	99.9531	93.6648	99.3397	99.4207	99.0335	98.9443	99.7445	99.5854	98.9595	97.6445	99.5026	99.6783	89.0933
PUR9M	99.7652	99.8104	99.718	99.6826	99.6349	98.6694	99.8993	99.5646	98.3978	99.6787	99.8632	99.9622	94.709	99.1904	99.0238	96.9732	95.909	99.7053	99.7379	98.6985	96.8327	98.8921	99.7767	4.25138
PUR9F	99.6128	99.9347	99.6919	98.2811	99.652	98.6725	99.8859	99.6138	98.2293	99.7628	99.8639	99.9238	95.9452	99.1329	99.0704	98.4259	99.6408	99.8663	99.2024	98.9463	98.2675	95.2448	99.4142	87.7996
PUR10P	99.1503	99.8402	99.8103	99.8054	99.5993	99.5455	99.5312	99.6787	97.18	99.8662	99.9259	99.775	94.6913	97.2563	97.6782	99.435	95.8772	99.9194	99.0334	98.3938	95.6984	95.9535	99.5492	89.5473
PUR10M	99.4497	99.8069	99.7772	99.8481	99.6173	99.919	99.7706	99.4841	97.2131	99.7968	99.9259	99.9499	94.4785	97.0768	98.6745	98.1958	98.3992	99.8966	98.8537	98.4759	96.263	97.0506	99.7034	4.11338
PUR10F	99.4676	99.9187	99.5615	98.3712	99.8623	98.6145	99.892	99.6391	96.3435	99.8953	99.9387	99.9498	95.2067	99.2902	97.2109	98.3627	97.9426	99.7203	99.8084	98.8413	97.3525	98.0897	99.0879	89.4385
PUR11P	99.5293	99.8844	99.6253	99.6721	99.4249	99.8326	99.8263	99.6856	94.137	99.8711	99.8632	99.8352	95.677	99.1941	98.7789	97.7549	99.4696	99.3413	98.4509	98.7096	95.6188	93.4819	99.6517	4.21451
PUR11M	99.7835	99.8429	99.6674	99.6539	99.8432	99.8504	99.6764	99.2444	96.8901	99.7951	99.798	99.9418	97.194	99.4392	98.8779	98.1737	99.4379	99.8337	99.4902	99.2035	98.4656	97.9346	99.574	4.10007
PUR11F	99.6527	99.8998	99.6381	99.8532	99.5647	98.6714	99.8564	99.7256	96.3951	99.9101	99.8591	99.8995	95.0014	98.8703	98.8177	97.2686	99.4712	99.3836	98.7743	98.8725	96.8789	93.901	99.344	88.6331
PUR12P	99.292	99.7866	99.6728	98.3067	99.7431	98.6701	99.8841	99.6777	97.7984	99.8745	99.8666	99.9577	95.8017	99.2389	99.2303	96.5561	96.1456	99.7503	99.6485	99.1688	99.1279	98.676	99.6209	4.30978
PUR12M	99.3991	99.7688	99.6385	99.4554	99.6657	99.8452	99.8933	99.6645	98.5629	99.6109	99.9394	99.7874	95.206	99.2068	98.7625	98.3633	98.6501	99.7257	99.7574	99.3531	98.3535	99.1834	99.5042	4.31089
PUR12F	99.3242	99.7865	99.5381	98.2945	99.5216	98.65	99.7778	99.3815	95.2943	99.8456	99.5991	99.856	95.613	98.9366	98.9072	95.5266	98.9899	99.7706	99.035	98.5737	97.6287	96.4617	99.2169	88.5473
PUR13P	99.3325	99.7837	99.5494	98.3564	99.6761	98.6584	99.8887	99.8183	97.0532	99.4407	99.8354	99.9222	95.5236	99.0649	98.3018	97.3435	98.5189	99.3393	99.3392	98.2522	96.0331	96.9517	99.5754	72.7322
PUR13M	99.4826	99.6758	99.4485	98.4195	99.7395	98.5829	99.9183	99.4789	95.6076	99.6033	99.8199	99.9284	97.4195	98.0615	96.8676	97.8551	98.497	98.1111	99.4777	99.5225	96.9942	94.7538	99.6681	4.21711
PUR13F	99.4458	99.8002	99.6573	98.3515	99.6583	98.537	99.8752	99.7033	97.2259	99.5656	99.907	99.9355	95.2451	99.3899	98.7713	98.0833	99.2899	99.3807	99.373	98.4327	96.9648	98.4416	99.5285	73.5383
PUR14P	99.4399	99.7945	99.5771	99.826	99.9199	98.5832	99.8801	99.0285	94.1519	99.8565	99.9076	99.9421	95.7075	99.2419	99.0416	98.9032	99.3663	99.3438	99.6631	98.5001	95.7108	97.4191	99.6564	4.01359
PUR14M	99.6602	99.9099	99.6208	99.7836	99.9412	99.803	99.5203	99.549	94.7462	99.8879	99.9265	99.9524	97.0821	99.2583	98.9067	98.1553	99.842	99.7656	99.7024	97.9573	96.4842	98.3829	99.8097	4.2497
PUR14F	99.598	99.8769	99.4946	98.3342	99.6924	98.5419	99.9062	99.3494	95.2566	99.8771	99.8152	99.8958	95.8573	99.5355	98.8738	99.0047	97.2735	98.6351	99.8271	99.7018	95.4874	99.0736	99.298	86.4352
EUR14P	99.704	99.8968	99.2469	99.7946	99.6856	98.7134	99.6932	99.7233	97.2241	99.6886	99.8387	99.9509	96.7003	98.3731	97.6485	98.5748	99.1708	99.8635	99.4226	98.8357	99.4438	98.6277	99.4029	96.6075
EUR14M	99.6493	99.8677	99.6257	98.2548	99.6786	98.7197	99.6135	99.581	96.5923	99.864	99.8793	99.9443	95.2483	97.5462	98.8777	97.7048	98.3981	99.7872	99.067	98.8082	97.1979	99.1751	99.5538	4.13691
EUR14F	99.7073	99.8907	99.5124	99.6765	99.4939	99.8527	99.8676	99.7426	97.404	99.6241	99.8433	99.9418	96.7677	99.6327	96.7599	98.3229	98.9046	99.8848	99.679	98.5982	99.1521	98.5486	99.5423	96.8545
PUR15P	99.2079	99.8782	99.8107	98.3271	99.6878	98.7101	99.7939	99.4861	96.116	99.8679	99.7823	99.9395	94.8256	99.243	97.3132	96.962	95.9544	99.851	99.7725	99.0235	97.193	93.2207	99.6419	4.16583
PUR15M	99.6323	99.8531	99.9034	98.3766	99.6694	98.6639	99.7815	99.1211	94.0691	99.6831	99.898	99.9469	94.7106	99.0256	97.6796	98.5081	95.6419	99.8522	99.7046	98.3533	96.4276	98.2199	99.7365	4.21195
PUR15F	99.5223	99.8144	99.6201	98.3074	99.7058	98.6098	99.5489	99.4756	95.2242	99.827	99.8093	99.7618	95.2604	96.8505	98.2166	97.384	98.9639	99.7329	99.5547	99.0279	97.1168	93.9933	99.4156	89.8485
EUR9P	99.0146	99.834	99.6629	99.8051	99.3905	98.6679	99.9314	99.5782	97.6386	99.6688	99.8918	99.9471	96.8151	99.0998	98.9002	98.7012	99.1236	99.3834	99.3994	98.4591	97.5822	97.786	99.4125	83.0924
EUR9M	99.2977	99.8592	99.6395	99.8374	99.5084	98.6827	99.9264	99.6013	96.2563	99.6546	99.8882	99.9397	97.1819	98.9697	99.1214	99.0141	98.9491	99.8397	99.8257	98.4015	95.0121	97.3118	99.6398	4.28534
EUR9F	99.4606	99.8985	99.5344	98.3829	99.4148	99.2172	99.9117	99.4258	98.6179	99.8801	99.8633	99.7518	96.5915	98.8066	97.2173	97.635	98.5347	99.6178	99.334	98.2964	97.0225	94.006	99.5847	83.3605
EUR10P	99.1884	99.8528	99.7696	98.3199	99.9285	99.8076	99.9013	99.7245	96.2965	99.8843	99.8365	99.948	94.5826	99.608	98.9449	95.6071	99.5314	99.8082	99.7437	99.7947	97.1825	97.1634	99.6464	4.22954
EUR10M	99.3119	99.8626	99.7523	99.8213	99.658	99.8557	99.9037	99.5762	95.0609	99.8627	99.8624	99.9691	94.5668	98.843	98.8783	97.3623	99.764	99.8429	99.8431	99.8179	98.7641	99.3507	99.7796	4.29614
EUR10F	99.6742	99.8019	99.9358	98.2304	99.9379	98.5869	99.7589	99.8677	97.9272	99.8927	99.8833	99.9516	97.7598	99.2179	97.1829	98.1496	98.7176	99.0571	99.5979	98.3611	96.2004	95.0764	99.5664	89.2473
EUR5P	99.5361	99.8519	99.5476	99.8177	99.9052	98.6862	99.8762	99.8501	94.2807	99.8794	99.8429	99.8777	96.2258	99.4047	99.1374	97.7909	98.6185	99.854	99.2402	98.8345	99.0853	97.7342	99.4334	85.2629
EUR5M	99.2579	99.8567	99.3536	99.7853	99.868	98.7623	99.8952	99.6527	96.6824	99.8814	99.8797	99.8424	96.0095	99.3025	96.9564	98.4209	98.894	99.4483	99.7656	98.2935	99.6331	97.5343	99.7514	4.34098
EUR5F	99.6079	99.9004	99.86	99.3519	99.58	98.6797	99.9159	99.6951	94.8394	99.8978	99.85	99.8949	96.3493	98.8912	99.4057	96.5081	98.868	99.8462	98.5302	98.8483	98.0713	99.3065	99.631	85.9964

## Sheet: depth
sample	chr1	chr2	chr3	chr4	chr5	chr6	chr7	chr8	chr9	chr10	chr11	chr12	chr13	chr14	chr15	chr16	chr17	chr18	chr19	chr20	chr21	chr22	chrX	chrY
EUR7P	28.4685	29.8242	29.9524	30.4151	30.2726	29.9416	29.2344	29.8124	24.7607	29.1393	29.1694	29.4568	27.6116	28.9759	27.0283	25.255	25.9628	30.4558	24.1382	27.9932	28.9567	25.5189	15.1128	11.3001
EUR7M	20.8847	21.7612	22.0178	22.142	22.0658	21.7994	21.5076	21.8452	18.1884	21.4888	21.5151	21.4882	20.5726	21.4419	20.6219	19.2409	19.7502	21.7995	18.7034	21.0439	21.8307	20.6413	21.8486	0.420317
EUR7F	29.5275	31.7405	32.1596	32.879	32.3002	32.0639	31.3834	31.7809	26.4663	30.8663	30.8893	31.2526	30.4648	31.2554	28.5699	26.5999	28.1886	32.3173	24.9961	29.2	29.8227	26.7852	16.2676	11.8919
EUR13P	28.8208	30.0874	30.236	30.1186	30.3268	30.0076	29.7457	30.1008	25.1846	29.6626	30.1042	29.7333	28.0133	29.4003	27.6775	26.5462	27.9855	29.7477	26.6989	29.4018	28.7312	29.1385	15.0235	9.16703
EUR13M	26.5757	27.6549	27.7674	27.7262	27.9431	27.6633	27.2611	27.7402	23.3103	27.2303	27.5284	27.3378	26.3544	27.5936	25.5439	24.8668	25.6167	27.1212	25.4691	27.765	26.8605	26.4871	27.5547	0.478709
EUR13F	27.9402	28.8221	28.8774	28.6961	29.0404	28.6601	28.6041	28.7013	24.6939	28.5686	28.9497	28.5323	26.6618	28.5096	27.2746	27.1554	28.1031	28.5602	26.6245	28.4799	28.976	28.2777	14.4479	9.1903
EUR6P	34.5908	35.8093	36.6007	36.4269	36.3957	36.1681	35.5348	36.0969	30.6241	35.3795	35.4105	35.3692	33.4033	35.4951	33.5947	31.1549	32.6503	35.5368	30.8993	34.7884	36.317	32.8107	18.074	12.825
EUR6M	32.3939	33.337	33.9678	33.4674	33.5218	33.5772	33.2337	33.3345	28.4064	33.2147	33.3569	33.2834	31.9195	32.601	31.7561	29.6852	31.4188	33.8863	30.9521	32.1833	32.3732	33.1361	33.1561	0.590345
EUR6F	30.5178	32.0449	32.3963	32.5337	32.3835	32.291	31.8016	32.2827	26.7085	31.5672	31.8671	31.7722	30.5231	32.0223	29.0405	27.7251	29.3457	31.7175	27.8749	30.9655	32.2351	29.4162	16.048	10.7604
EUR11P	33.4515	35.0006	36.1424	35.5465	35.5402	35.3564	34.4315	34.8907	29.6613	34.4062	34.4199	34.7476	33.2473	33.5625	32.7707	29.6175	31.8032	35.4271	30.0574	33.8442	35.1379	33.0095	17.606	11.8174
EUR11M	35.128	36.7211	37.7606	37.266	37.326	36.9408	36.1419	36.4851	31.3623	36.1295	36.3711	36.5866	34.5684	35.7344	34.0789	31.7805	33.4841	36.312	31.7831	35.0339	37.0676	33.8355	36.6556	0.675782
EUR11F	32.9907	33.7661	34.4143	33.8269	34.3911	33.9374	33.6589	33.8633	29.2743	33.4476	33.4988	33.7456	32.1764	33.0004	31.7941	30.2016	32.0033	33.5083	30.6542	32.9034	32.8759	33.9419	16.8632	11.9474
EUR12P	34.6473	35.9995	36.653	36.0602	36.3564	35.8837	35.6629	35.9126	31.1264	35.6777	36.217	36.1285	33.3392	35.8656	33.9149	32.4034	33.7183	36.0987	32.3321	34.796	36.4367	34.703	18.3442	26.9045
EUR12M	33.4278	34.7923	34.8544	34.8723	35.2408	34.8425	34.2861	34.9147	29.735	34.2855	34.4877	34.5492	32.0612	34.4531	31.5114	30.6376	31.5757	34.8884	29.7639	33.1585	35.5267	33.7919	34.5877	0.561736
EUR12F	31.8059	33.0441	33.3745	32.8169	33.5077	32.9864	32.694	33.0002	28.4849	32.8998	33.0528	32.997	30.9485	32.5727	31.0837	29.9609	30.7663	33.3949	30.9123	32.2687	32.1851	31.3266	16.5865	12.4111
EUR8P	35.7835	37.1446	37.5207	37.7854	37.3148	37.3153	36.5853	37.2432	31.26	36.5054	36.7315	36.7587	35.3026	35.8015	34.5242	34.357	33.8593	37.3216	32.3506	35.4036	36.4805	35.1659	18.6628	13.9591
EUR8M	32.4422	33.6499	34.0558	33.8674	33.8073	33.7141	33.2595	33.786	28.2188	33.3054	33.3245	33.2164	31.816	32.6215	31.6643	30.4899	30.988	33.6869	30.4398	32.0177	32.5981	32.9287	33.288	0.578224
EUR8F	30.5546	31.772	32.1392	32.2702	32.1924	32.2022	31.2131	31.9094	26.8452	31.3878	31.6106	31.6543	30.029	31.2634	29.467	28.5519	29.7892	31.8053	28.1271	31.1607	31.7253	29.8964	15.8857	11.4576
EUR4P	22.7084	24.8386	24.756	25.0972	24.9244	24.891	24.1448	24.7639	19.6423	23.9452	23.9221	23.9776	22.9559	23.4573	21.7356	19.3722	21.2103	24.0331	18.8227	22.163	22.1895	19.7243	12.1276	7.62165
EUR4M	24.9445	27.3775	27.2047	27.7216	27.4652	27.4757	26.5247	27.3072	21.4384	26.4861	26.3142	26.572	25.3001	25.8599	23.4791	21.1931	23.1211	26.431	20.5042	24.2252	24.5937	21.3155	26.7683	0.446195
EUR4F	21.4751	23.5031	23.4092	23.6295	23.5147	23.5575	22.8155	23.342	18.5488	22.8784	22.6184	22.8423	21.8431	22.3056	20.5281	18.3025	20.3936	22.4597	18.0505	21.1441	21.1133	19.1008	11.5917	6.90335
EUR3P	25.8483	26.9654	27.39	27.482	27.463	27.255	26.364	27.0299	22.2646	26.4659	26.55	26.8692	25.4058	25.932	24.8667	23.3322	23.9587	26.7936	22.4377	25.1441	26.4228	24.8844	13.7785	9.88574
EUR3M	25.7523	26.6733	27.3363	27.5166	27.2656	27.2207	26.2989	26.7305	22.033	25.9084	26.103	26.4208	25.4522	25.811	23.9687	22.4274	22.8721	26.5963	21.087	24.4158	26.0594	22.9186	26.8957	0.438356
EUR3F	28.2102	29.3544	29.8565	29.8836	29.953	29.8027	28.8221	29.3472	24.8341	28.8384	29.1388	29.2504	27.9526	28.5675	27.3683	25.919	26.7494	29.6238	25.0013	27.5963	29.2303	29.7602	14.7707	11.3667
EUR1P	29.5083	30.9414	31.7803	32.9367	31.7551	31.6246	30.0582	30.7665	25.6104	29.4135	29.6628	30.2446	31.326	29.765	27.5489	25.3144	25.5434	31.2979	21.8715	26.7638	29.0895	25.7862	15.8638	12.6341
EUR1M	25.3822	27.1327	27.7866	29.1079	27.8547	27.7215	26.3794	27.122	22.3692	25.5975	25.6948	26.4185	27.0415	26.1152	23.629	21.7169	21.7161	27.29	18.7864	22.7871	25.3634	21.0518	27.3091	0.388959
EUR1F	29.7509	32.0716	32.966	34.5035	33.1743	33.0069	31.2189	31.973	26.0642	30.2308	30.7044	31.3504	34.2369	30.4693	28.7309	24.8456	25.4959	32.5128	21.7373	27.5337	28.9337	25.3015	16.4277	12.8721
PUR1P	11.0619	12.3817	12.9966	13.9487	12.9905	12.7339	12.1349	12.4055	9.91586	11.3172	11.5695	11.9909	13.1955	11.5857	10.4094	9.31005	8.7552	12.5752	7.37563	9.93528	11.7873	8.60289	12.7578	0.136088
PUR1M	34.0229	35.5006	36.2081	36.1914	36.1672	35.5254	35.1704	35.5238	30.6571	34.693	34.7155	35.1557	34.1978	34.3226	32.0445	31.9887	31.948	35.5333	29.7846	33.4039	35.9078	33.0776	35.5655	0.566386
PUR1F	35.919	37.8428	38.6754	38.6283	38.5023	38.1362	37.3514	37.9636	32.3011	37.2213	37.2395	37.5095	36.5291	37.1812	35.5747	33.9196	34.4847	38.3001	31.7962	35.5121	35.6883	33.8974	19.0954	14.8916
PUR2P	28.0922	28.98	29.3427	29.9616	29.56	29.2139	28.4136	29.0496	24.8156	28.1228	28.2089	28.4973	27.9322	29.5232	27.0808	24.9612	25.1197	29.1714	22.9887	26.5363	28.8556	24.4556	14.6512	14.066
PUR2M	31.3367	32.6523	32.927	33.5771	33.1803	32.7064	31.9005	32.7195	27.9177	31.7336	31.9533	32.0169	31.1377	32.0759	30.4226	27.5669	28.4993	33.5738	26.7489	30.3125	32.7802	28.8956	32.7486	0.499838
PUR2F	33.9759	34.5018	34.9986	35.8374	35.5207	34.8069	33.7294	34.7279	29.1821	33.5056	33.5726	33.8949	33.2687	34.7187	31.3506	29.7927	29.3997	34.7052	27.0278	31.6195	34.6108	29.4316	17.5161	15.992
PUR3P	30.1655	31.2653	32.0392	32.0941	32.1262	31.8598	30.9296	31.3479	26.49	30.5215	30.5445	30.8717	29.9959	31.3116	29.777	27.0218	27.4865	31.8322	24.9529	28.5085	31.0451	28.8964	31.1279	0.501393
PUR3M	32.931	34.561	35.3257	35.779	35.6719	35.245	34.0056	34.6431	29.2546	33.5891	33.5749	34.2968	33.4105	33.7171	32.2535	29.6299	29.9533	35.1156	27.8248	31.8621	35.0227	31.623	34.5511	0.501677
PUR3F	26.1197	27.4412	28.0837	28.5987	28.1075	27.7823	26.8472	27.3662	22.6794	26.208	26.5445	26.8637	27.1114	27.4989	25.8995	23.0777	23.185	27.3909	21.0555	24.5939	26.2682	23.7085	13.7241	11.0832
PUR4P	33.1344	35.0016	35.3404	36.2404	35.6428	35.4879	34.2883	35.0605	29.4591	34.015	34.1922	34.5758	34.4362	33.2512	31.2627	29.5378	29.9967	35.2267	27.0801	32.0293	32.9824	32.3912	17.7779	14.6853
PUR4M	29.0818	30.1733	30.7951	30.7821	30.7631	30.4514	29.7166	30.2021	26.3287	29.6465	29.9745	29.7905	29.5633	28.6488	27.5872	27.1864	27.0912	30.3017	25.2416	28.8917	30.7158	28.4305	30.2486	0.566829
PUR4F	29.7326	30.8825	31.4118	31.6269	31.1579	31.1135	30.2183	30.8667	26.741	30.1189	30.1791	30.713	29.9066	30.5616	28.5424	26.7827	27.3785	30.6395	25.1864	28.9415	29.8017	29.6883	15.5918	13.4276
PUR5P	35.4806	37.0888	37.6505	38.3636	38.142	37.357	36.6358	37.2913	31.6714	36.2132	36.4805	36.5991	36.9559	36.0719	35.2415	32.2094	32.8489	38.1362	29.7444	34.4078	36.2258	32.9537	37.6167	0.57871
PUR5M	35.7759	36.7008	36.9308	37.3636	37.6839	37.1536	36.5764	36.8593	31.8235	36.2198	36.0966	36.5218	36.0822	36.1112	35.0115	33.1343	32.8142	37.0525	31.403	34.8277	36.5504	34.7864	36.7801	0.667713
PUR5F	32.6745	34.3671	35.0837	35.5893	35.1518	34.6939	33.6955	34.6243	28.8423	33.4245	33.6408	33.7157	33.5136	32.6553	31.7653	29.1084	29.9562	34.9231	26.7261	31.6879	33.4563	30.7945	17.4567	13.3088
PUR6P	33.042	34.4488	35.0989	35.2588	35.2474	34.8299	34.0419	34.397	29.9313	33.8395	34.5072	34.0822	33.1127	34.6855	32.3017	29.5789	30.9285	34.6289	28.3541	32.3823	34.2351	32.3226	17.4235	13.3933
PUR6M	34.309	35.0075	35.429	35.9756	35.6967	35.3219	34.4039	35.6827	30.4235	33.9176	34.8763	34.4952	33.6854	34.6035	32.7567	28.7024	30.8141	35.245	27.888	32.5782	34.0963	30.3703	35.1221	0.556038
PUR6F	32.5708	34.2679	35.0882	35.1898	34.8182	34.4583	33.7842	34.3033	28.5164	33.4567	33.6227	33.9725	32.5184	33.928	30.5089	29.7573	30.0041	34.3916	27.2528	31.7153	32.7805	32.2264	17.3476	13.0083
EUR15P	35.4523	37.4004	37.8445	38.771	38.1639	37.197	36.8736	37.749	31.0648	36.5872	36.9469	36.5284	36.8652	37.1782	34.3645	32.0933	31.9021	37.3308	29.4614	34.5545	35.183	32.7938	39.0878	0.660321
EUR15M	31.5663	33.7874	34.4489	35.4549	34.6516	34.0071	33.4017	34.0821	27.9631	32.7419	32.9332	33.0088	34.1509	32.857	30.3136	28.8167	28.3578	34.337	25.343	30.3017	31.6798	31.2932	35.0102	0.569692
EUR15F	30.6928	32.388	33.3382	33.5994	32.8413	32.69	31.8362	32.4766	27.3047	31.4382	31.6598	31.8806	31.5778	32.0097	29.7312	27.3336	28.3864	31.7365	25.4488	29.7699	30.7642	27.9058	16.2943	11.25
EUR2P	27.5477	29.4224	30.7087	32.2383	30.8333	30.4998	28.984	29.6619	25.0284	27.9512	28.2345	28.9936	30.9471	28.7757	25.5614	22.8307	22.6745	30.1812	19.8361	24.6987	27.3357	22.5079	15.2985	13.8287
EUR2M	30.1711	32.5587	33.1297	34.1687	33.4171	33.0612	31.8539	32.4822	27.2109	31.5467	31.5516	32.165	32.7666	31.4057	28.8374	26.3929	27.5662	32.358	25.0084	28.6691	30.9415	27.511	32.9478	0.51979
EUR2F	30.1331	31.5831	32.4025	33.4223	32.589	32.4057	31.1284	31.6763	27.856	30.5256	30.3947	31.207	31.3892	30.697	28.2318	26.3288	26.3613	31.917	23.8377	28.1646	30.6527	27.1459	16.2256	14.2575
PUR7P	40.1221	43.1183	44.175	46.6015	44.7241	44.0672	42.3775	43.2947	35.3924	40.9889	41.0254	42.4777	43.4885	41.4226	38.7352	35.1101	34.5292	44.201	30.0991	37.1168	41.619	33.3997	44.4308	0.60814
PUR7M	25.3753	27.5109	28.3792	29.722	28.4731	28.2687	26.8777	27.7827	22.3812	26.2179	26.1855	27.0385	28.0629	26.0247	23.968	22.3558	21.4722	27.9429	18.9808	23.9124	25.7724	21.6447	28.5222	0.425275
PUR7F	29.1596	31.6612	33.1369	34.5798	32.7824	32.5798	30.8368	32.3533	25.6042	29.8932	30.1542	30.9933	32.1602	31.0594	28.4138	24.6922	24.6183	32.6825	21.0076	26.6574	31.2325	23.4842	16.4165	15.5245
PUR8P	45.9508	49.9188	50.9526	52.4065	50.9435	50.4715	49.046	50.0851	42.3876	48.2171	48.5183	48.8854	49.0732	48.0752	45.0175	42.9257	42.0854	49.6971	37.6958	45.5469	48.4664	42.711	24.971	19.3479
PUR8M	38.318	41.8472	43.038	45.0614	42.9813	42.648	40.9195	42.0252	34.4807	39.5908	40.3599	40.6959	43.3893	40.5149	37.0906	35.0253	33.3385	42.2291	29.151	36.078	40.2987	33.9819	42.9329	0.623907
PUR8F	41.3083	44.2488	45.1893	46.7147	45.4779	44.7279	43.7692	44.5806	38.1966	42.7142	43.0543	43.646	43.2241	43.4211	39.4136	36.5106	37.2321	44.5017	32.2905	40.631	45.177	38.3531	22.7736	18.2726
PUR9P	39.4516	41.1281	41.9287	42.7669	42.1761	41.6609	40.5159	41.9753	35.1081	40.0501	39.9804	40.4853	39.6503	40.4186	37.7955	34.854	34.6772	41.6515	31.6824	37.5089	40.7073	36.4351	21.0243	17.1805
PUR9M	28.6544	29.964	31.0154	31.3486	30.7414	30.4566	29.6055	30.1887	25.9452	29.1483	29.2124	29.7578	29.4871	29.1536	27.4462	24.7486	24.9063	30.208	23.1245	26.9957	28.794	26.4565	30.8073	0.45759
PUR9F	33.4077	34.6704	35.2703	35.1965	35.0679	34.6622	33.9208	35.1802	29.8228	33.8191	34.0674	33.9922	33.0737	33.936	32.6576	30.3814	30.9146	35.1331	29.043	33.3029	35.0287	31.9528	17.3734	14.1526
PUR10P	29.9364	31.5444	32.101	32.5173	32.0722	31.5375	30.8711	31.7616	27.556	30.881	31.0959	30.8864	29.7317	31.1798	30.4404	29.831	27.5341	32.5069	25.9088	29.3811	31.6618	28.729	15.9231	15.7061
PUR10M	27.8357	29.5324	29.9851	30.5474	30.1893	29.7681	28.8801	29.4656	24.9198	28.681	29.0277	28.874	28.0834	28.6035	27.5333	26.7315	25.2656	30.0304	22.846	27.0622	29.2623	25.8201	29.4972	0.408471
PUR10F	30.1955	32.1533	32.6275	33.2451	32.8848	32.3173	31.4022	32.0758	27.2394	31.0325	31.3994	31.3048	30.5283	31.8158	29.4461	28.0878	27.1713	32.1501	25.2755	29.5869	31.7632	27.8912	16.2075	14.279
PUR11P	27.4238	29.3855	30.375	31.9117	30.2975	30.0212	28.6745	29.4996	24.0975	27.5353	27.8923	28.4043	29.7721	27.9941	26.2089	23.1514	22.8578	29.8584	18.94	24.9088	27.9056	21.3348	30.6671	0.419437
PUR11M	31.1045	32.5366	33.1192	33.8901	33.2366	33.0973	31.8316	32.6419	26.8937	31.3132	31.5071	31.6839	31.3602	32.439	29.5146	27.2944	27.3297	32.8903	24.8338	29.6947	32.4042	27.6559	32.9009	0.484323
PUR11F	32.1092	34.168	34.9642	36.0172	35.1392	34.7193	33.6486	34.5479	29.087	33.2231	33.2462	33.5584	33.2278	33.1475	31.5139	29.9863	28.7227	34.4785	25.3594	31.1848	32.2811	28.1338	17.3915	16.1599
PUR12P	33.3359	36.5357	37.8249	39.3561	37.932	37.3175	35.7827	36.7837	30.4008	34.57	34.7818	35.5915	36.7448	35.188	32.1318	27.5495	28.1916	36.5862	25.1634	30.9585	35.0525	28.1295	37.6003	0.543754
PUR12M	29.7807	32.4668	33.3707	34.9493	33.5068	33.1231	31.9246	32.3743	27.1547	30.8149	31.1239	31.824	32.6645	31.2546	28.5384	25.3175	25.6	32.107	22.8064	27.062	31.3368	24.1204	33.2259	0.522058
PUR12F	31.4112	35.8067	37.5211	40.5553	37.7085	37.1502	34.8263	35.7411	28.6939	32.6927	32.8077	34.5197	38.7617	34.7394	29.7509	24.0981	24.1383	36.8745	19.4697	27.1701	33.3551	21.963	18.7209	15.4359
PUR13P	30.5371	32.6186	33.6575	34.8673	33.5713	33.1205	31.9428	32.5222	27.4029	30.9293	31.3251	31.9231	32.681	31.2578	29.0654	25.9515	26.55	32.3309	23.3593	28.0545	31.8939	25.3642	16.7961	11.2487
PUR13M	27.3991	29.9787	30.849	32.8542	31.3046	30.8487	29.3047	30.0764	24.2841	28.0724	28.6275	29.1138	30.9629	28.0902	25.6083	22.8478	23.0927	29.8098	19.3871	24.7772	27.5267	22.342	31.1053	0.425004
PUR13F	31.4945	34.242	35.7097	37.1615	35.5105	34.9625	33.4881	34.2846	28.2915	32.1418	32.6232	33.2248	34.0657	32.5253	29.506	27.4627	26.2393	34.0409	22.6464	28.5958	32.7107	25.5608	17.8422	11.4279
PUR14P	26.1136	28.0736	28.8164	30.0227	28.9789	28.5568	27.2257	28.1006	23.3178	26.645	26.8707	27.286	27.9104	26.8304	24.7054	24.0692	22.8151	27.756	20.0911	24.0269	26.4935	21.8693	28.8082	0.351145
PUR14M	32.0952	34.1837	35.0523	36.3785	35.3191	34.8306	33.1535	34.2034	28.1601	32.482	32.8371	33.3786	33.68	32.5752	30.4021	27.7325	28.4153	34.4828	24.3009	29.2223	32.2623	27.7446	34.8956	0.48125
PUR14F	34.7404	37.0227	37.7793	39.5707	38.0973	37.5208	35.9743	37.2472	30.374	35.085	35.2504	36.1024	37.9938	34.8256	32.5606	31.4661	30.0909	36.7432	26.5716	31.6295	35.448	30.0058	19.0415	13.9398
EUR14P	31.6105	33.0855	33.735	34.9882	34.124	33.7701	32.3535	33.3624	27.6805	31.9985	31.8777	32.727	32.7329	31.7497	30.2377	27.8773	27.0539	33.9139	24.5169	30.3511	31.8989	28.417	16.936	16.3208
EUR14M	30.7038	32.4534	33.195	34.2173	33.2099	33.1188	31.7489	32.3605	27.1678	31.0454	31.4595	31.9729	32.0754	30.7396	30.3286	26.9563	26.6419	32.9059	22.9483	28.8342	30.4242	26.8703	33.1034	0.506213
EUR14F	33.0869	34.3355	34.883	35.8682	35.411	34.9178	33.4824	34.4475	29.1775	33.2399	33.109	33.8636	34.2869	33.4436	30.5231	28.7691	29.173	34.7439	26.2774	31.1248	33.2272	28.651	17.5803	16.5223
PUR15P	31.436	33.0773	34.1864	34.7773	33.9671	33.5836	32.5399	33.1257	27.8093	31.893	32.5432	32.3091	32.0117	32.5678	30.2484	27.531	28.0079	33.8547	25.7707	29.9255	31.8223	29.0516	33.7944	0.531881
PUR15M	31.6928	33.7226	34.9416	36.0376	34.7288	34.4908	32.937	33.9796	27.5166	32.0838	32.9368	32.7643	33.5557	32.4419	30.2304	26.9931	27.0504	34.4056	24.0233	29.473	32.3623	28.0236	34.5302	0.513447
PUR15F	30.742	32.6659	33.672	35.0606	33.7409	33.5104	31.7209	32.6503	26.4292	30.7667	31.2575	31.6435	32.8471	31.0582	28.9995	25.496	26.0414	33.1667	22.7143	28.1779	31.3682	24.8514	16.9147	14.8289
EUR9P	27.869	30.0882	30.9272	32.2721	31.0273	30.8432	29.5577	30.1534	25.5613	28.4822	29.2291	29.6092	30.0375	29.1749	26.7204	24.3641	24.5409	30.4267	21.2762	25.8536	27.7524	23.2135	15.431	11.3503
EUR9M	30.6947	32.9059	33.7107	34.9349	33.8397	33.6264	32.248	33.0926	27.5589	31.5892	31.951	32.4283	33.9044	31.9919	30.2296	27.8625	27.5462	33.113	23.9423	28.6067	30.7047	28.2861	33.4629	0.484397
EUR9F	30.8174	33.1192	34.0743	36.1846	34.1668	33.8057	32.3502	33.1711	27.9802	31.1404	31.4309	32.3773	33.4667	31.4507	28.3968	25.4629	26.0344	33.5313	22.6778	27.8049	31.8907	25.0124	17.1542	12.8144
EUR10P	30.4992	32.9885	33.9548	34.7328	33.7888	33.5508	32.1872	33.0991	27.562	31.7255	31.7366	32.4108	32.1678	32.5717	30.0135	26.1897	27.5291	32.9125	26.1959	29.1425	30.5678	27.4235	33.5576	0.502799
EUR10M	32.7469	35.097	35.9867	36.6797	35.9215	35.7123	34.3232	35.0991	29.1109	33.9136	33.9722	34.5395	33.8819	34.3146	32.0865	28.0025	30.1251	35.1756	28.724	32.0618	33.0461	29.0476	35.3492	0.570222
EUR10F	29.0298	30.7484	31.4847	32.2712	31.4867	31.1933	30.088	30.8772	26.2914	29.7821	29.8786	30.3506	30.343	30.9373	27.5424	25.8331	26.1657	30.7367	23.7335	27.8785	28.4355	26.9782	15.7019	13.133
EUR5P	31.0297	32.8659	33.635	34.7198	33.6464	33.8656	32.1822	33.1264	26.8743	31.5171	31.872	32.3864	32.2561	31.8179	29.8415	27.1562	27.8438	33.019	24.247	29.278	32.4517	26.8883	16.8765	13.1272
EUR5M	30.5012	32.8143	33.1902	33.9957	33.3658	33.4829	32.2496	32.9305	27.9013	31.8916	31.9344	32.1508	32.1039	32.4874	29.7032	28.9925	28.514	32.5729	25.7778	29.6746	32.5501	29.4112	33.1612	0.526073
EUR5F	35.7434	37.1433	38.4501	38.7822	38.0853	38.2662	36.3676	37.4503	30.4152	35.9474	35.9232	36.7885	36.5389	36.0833	34.7374	30.0127	31.6892	37.2897	27.4962	33.4596	36.1363	30.8992	18.9959	15.3249

## Sheet: counts
sample	population	del_count	dup_count	ins_count	inv_count	total_sv_count	snv_count
EUR7P	EUR	17587	163	12162	30	29942	706482
EUR7M	EUR	16913	151	12140	25	29229	308173
EUR7F	EUR	16883	152	12060	25	29120	786786
EUR13P	EUR	17834	219	12767	28	30848	744595
EUR13M	EUR	17629	203	12617	28	30477	636093
EUR13F	EUR	17460	212	12586	30	30288	682031
EUR6P	EUR	18445	204	12853	27	31529	994899
EUR6M	EUR	18827	204	12689	25	31745	892363
EUR6F	EUR	17811	182	12369	27	30389	840377
EUR11P	EUR	18237	210	12514	30	30991	979178
EUR11M	EUR	17543	216	12380	25	30164	1031855
EUR11F	EUR	18901	206	12386	28	31521	923946
EUR12P	EUR	19449	207	13220	27	32903	1006606
EUR12M	EUR	18267	201	12886	25	31379	957974
EUR12F	EUR	18058	183	12506	29	30776	886129
EUR8P	EUR	19230	189	12444	31	31894	1036904
EUR8M	EUR	19072	183	12549	30	31834	909452
EUR8F	EUR	17457	166	12177	28	29828	831453
EUR4P	EUR	12555	91	10875	22	23543	467450
EUR4M	EUR	12494	74	10789	23	23380	594286
EUR4F	EUR	11675	69	10407	28	22179	401115
EUR3P	EUR	17837	190	12140	29	30196	578882
EUR3M	EUR	17633	165	12063	24	29885	561671
EUR3F	EUR	17519	203	12378	23	30123	706077
EUR1P	EUR	19744	184	12542	32	32502	749013
EUR1M	EUR	19070	150	12434	30	31684	559636
EUR1F	EUR	19127	181	12413	31	31752	785662
EUR15P	EUR	18465	237	12855	26	31583	1119480
EUR15M	EUR	18379	220	12788	29	31416	906389
EUR15F	EUR	18598	205	12948	28	31779	860028
EUR2P	EUR	18408	207	12531	28	31174	690339
EUR2M	EUR	18088	205	12652	30	30975	830008
EUR2F	EUR	18162	191	12510	26	30889	792268
EUR14P	EUR	19035	226	13183	29	32473	843246
EUR14M	EUR	18694	200	12987	33	31914	815395
EUR14F	EUR	18711	218	12732	28	31689	890087
EUR9P	EUR	18948	187	12817	29	31981	699996
EUR9M	EUR	18007	186	12484	24	30701	836627
EUR9F	EUR	17874	180	12760	34	30848	812782
EUR10P	EUR	18943	213	12744	24	31924	820966
EUR10M	EUR	18792	205	12900	26	31923	923881
EUR10F	EUR	18815	221	12634	28	31698	742666
EUR5P	EUR	18831	203	12823	34	31891	860018
EUR5M	EUR	18826	193	12899	27	31945	854487
EUR5F	EUR	18550	193	12776	27	31546	1014053
PUR1P	PUR	17876	179	12542	28	30625	34802
PUR1M	PUR	19519	225	13381	32	33157	1012422
PUR1F	PUR	19695	198	13742	28	33663	1130319
PUR2P	PUR	19228	245	13579	36	33088	699915
PUR2M	PUR	19626	210	13637	34	33507	867276
PUR2F	PUR	19303	229	13407	35	32974	946810
PUR3P	PUR	20047	254	14209	35	34545	865249
PUR3M	PUR	21195	224	14479	34	35932	993136
PUR3F	PUR	19052	205	13601	43	32901	641359
PUR4P	PUR	19772	207	13636	30	33645	987039
PUR4M	PUR	19782	185	13574	30	33571	769466
PUR4F	PUR	18390	201	12969	26	31586	886509
PUR5P	PUR	18942	245	13197	28	32412	1050862
PUR5M	PUR	18711	257	13382	29	32379	1050648
PUR5F	PUR	19276	231	13507	31	33045	937287
PUR6P	PUR	20062	242	13586	19	33909	957406
PUR6M	PUR	19569	241	13197	23	33030	978464
PUR6F	PUR	18607	230	13231	25	32093	943870
PUR7P	PUR	19354	209	13569	41	33173	1194935
PUR7M	PUR	18571	179	13199	34	31983	619975
PUR7F	PUR	18427	192	13074	32	31725	785921
PUR8P	PUR	21476	296	13994	34	35800	1409801
PUR8M	PUR	20994	266	13793	34	35087	1175669
PUR8F	PUR	20708	279	14027	29	35043	1292256
PUR9P	PUR	20288	225	13946	34	34493	1183410
PUR9M	PUR	20558	229	13974	38	34799	739689
PUR9F	PUR	19581	215	13557	35	33388	986151
PUR10P	PUR	18782	212	12967	29	31990	821744
PUR10M	PUR	18592	195	12986	30	31803	720219
PUR10F	PUR	19299	193	13230	29	32751	820766
PUR11P	PUR	18599	209	13550	30	32388	721166
PUR11M	PUR	18996	213	14086	33	33328	873527
PUR11F	PUR	19032	220	13640	31	32923	952109
PUR12P	PUR	19577	221	13145	36	32979	975034
PUR12M	PUR	18624	221	13183	35	32063	817328
PUR12F	PUR	18839	211	12788	29	31867	893780
PUR13P	PUR	16913	203	12562	26	29704	823511
PUR13M	PUR	17285	188	12833	29	30335	715739
PUR13F	PUR	16785	194	12533	18	29530	877811
PUR14P	PUR	18992	190	13323	28	32533	632839
PUR14M	PUR	19337	189	13622	29	33177	929566
PUR14F	PUR	18985	199	13307	38	32529	991323
PUR15P	PUR	18898	226	13483	31	32638	876435
PUR15M	PUR	18890	229	13348	30	32497	889859
PUR15F	PUR	17944	207	12910	30	31091	843640

## Sheet: regions
region	chromosome	region_type	total_sv	eur_mean_del	pur_mean_del	del_difference	del_ratio	del_log2_ratio	eur_mean_ins	pur_mean_ins	ins_difference	ins_ratio	ins_log2_ratio	eur_mean_dup	pur_mean_dup	dup_difference	dup_ratio	dup_log2_ratio	eur_mean_inv	pur_mean_inv	inv_difference	inv_ratio	inv_log2_ratio	total_eur_sv	total_pur_sv	total_sv_difference	sv_ratio	sv_log2_ratio	del_median_eur	del_median_pur	del_p	del_q	ins_median_eur	ins_median_pur	ins_p	ins_q	dup_median_eur	dup_median_pur	dup_p	dup_q	inv_median_eur	inv_median_pur	inv_p	inv_q	total_sv_median_eur	total_sv_median_pur	total_sv_p	total_sv_q	total_snv
chr9_q_arm	9	arm	7442	258.4	278.87	20.5	1.0792	0.11	247.73	270.07	22.3	1.09	0.125	3	2.47	-0.5	0.823	-0.28	1.13	1.47	0.34	1.301	0.379	510.26	552.88	42.62	1.084	0.116	260	276	0.0018	0.0463	245	274	0	0.02	3	2	0.367	0.892	1	1	0.5077	1	510	553	0.0001	0.0067	150827
chr6_q_arm	6	arm	11055	431.8	468.8	37	1.0857	0.1186	387.53	424.13	36.6	1.094	0.13	1.33	1.6	0.3	1.203	0.267	1.47	1.8	0.33	1.224	0.292	822.13	896.33	74.2	1.09	0.125	429	465	0.0028	0.0464	388	420	0	0.01	1	1	0.504	0.987	2	2	0.3344	1	821	900	0.0001	0.0067	273521
chr13_q_arm	13	arm	10524	403.07	430.73	27.7	1.0686	0.0958	372.8	399.2	26.4	1.071	0.099	0.73	0.33	-0.4	0.452	-1.145	0.47	0.53	0.06	1.128	0.173	777.07	830.79	53.72	1.069	0.096	401	432	0.0008	0.0428	373	398	0.002	0.033	1	0	0.13	0.739	0	0	0.4223	1	781	825	0.0002	0.0096	239242
chr6_p_arm	6	arm	5740	188.93	202.07	13.1	1.0695	0.097	211.47	222.53	11.1	1.052	0.074	2.73	2.27	-0.5	0.832	-0.266	0.47	0.87	0.4	1.851	0.888	403.6	427.74	24.14	1.06	0.084	189	201	0.0143	0.0924	213	222	0.026	0.119	3	2	0.233	0.868	0	1	0.0501	1	404	424	0.0004	0.0118	159390
chr20_pericent_q	20	q	298	8.33	10.87	2.5	1.3049	0.384	7.73	12	4.3	1.552	0.634	0	0	0	NA	NA	0	0	0	NA	NA	16.06	22.87	6.81	1.424	0.51	8	11	0.0085	0.091	8	12	0.001	0.033	0	0	1	1	0	0	1	1	16	21	0.0004	0.0118	7107
chr10_p_arm	10	arm	4961	184.2	199.07	14.9	1.0807	0.112	172.87	191.33	18.5	1.107	0.146	0.47	0.67	0.2	1.426	0.512	2	0.93	-1.07	0.465	-1.105	359.54	392	32.46	1.09	0.125	183	197	0.0034	0.0464	170	189	0	0.021	0	1	0.209	0.837	2	1	0.0054	0.8198	360	388	0.0005	0.0118	103774
chr3_p_arm	3	arm	6189	219.27	234.67	15.4	1.0702	0.0979	233.33	255.47	22.1	1.095	0.131	0.27	0.2	-0.1	0.741	-0.433	0.53	0.2	-0.33	0.377	-1.406	453.4	490.54	37.14	1.082	0.114	222	234	0.012	0.0924	237	254	0.002	0.033	0	0	0.952	1	1	0	0.0661	1	457	488	0.0006	0.0118	220999
chr22_pericent_q	22	q	886	37.33	43.8	6.5	1.1733	0.2306	28	33.13	5.1	1.183	0.243	0.67	1.13	0.5	1.687	0.754	0	0	0	NA	NA	66	78.06	12.06	1.183	0.242	38	43	0.0041	0.0483	28	34	0.004	0.04	1	1	0.162	0.739	0	0	1	1	69	80	0.0006	0.0118	11811
chr1_telo_p	1	p	1293	20.6	29.4	8.8	1.4272	0.5132	27.2	33.07	5.9	1.216	0.282	0.07	0.33	0.3	4.714	2.237	0	0	0	NA	NA	47.87	62.8	14.93	1.312	0.392	20	27	0.0036	0.0464	26	34	0.006	0.046	0	0	0.292	0.88	0	0	1	1	48	59	0.0008	0.0131	1359
chr21_q_arm	21	arm	5423	184.47	194.33	9.9	1.0535	0.0751	190.47	207.2	16.7	1.088	0.121	0.2	0.33	0.1	1.65	0.722	0.67	0.87	0.2	1.299	0.377	375.81	402.73	26.92	1.072	0.1	184	197	0.0588	0.2193	193	210	0.004	0.04	0	0	0.433	0.959	1	1	0.2132	1	377	401	0.0011	0.0157	84880
chr8_q_arm	8	arm	7770	286.07	303.4	17.3	1.0606	0.0849	283.87	315.4	31.5	1.111	0.152	1.93	1.87	-0.1	0.969	-0.046	1.87	1.67	-0.2	0.893	-0.163	573.74	622.34	48.6	1.085	0.117	285	302	0.0024	0.0463	290	309	0.001	0.029	2	1	0.641	1	2	2	0.3161	1	579	621	0.0011	0.0157	222300
chr2_q_arm	2	arm	12106	464.53	500.6	36.1	1.0776	0.1079	439.13	469.47	30.3	1.069	0.096	1.53	1.8	0.3	1.176	0.234	1.6	2.27	0.67	1.419	0.505	906.79	974.14	67.35	1.074	0.103	463	491	0.0006	0.0428	444	452	0.02	0.101	1	2	0.609	1	2	2	0.1295	1	911	964	0.0015	0.0177	315957
chr12_p_arm	12	arm	3371	106.73	115.47	8.7	1.0819	0.1136	129.93	138.93	9	1.069	0.097	1.13	1.6	0.5	1.416	0.502	0	0	0	NA	NA	237.79	256	18.21	1.077	0.106	105	115	0.0151	0.0924	131	135	0.032	0.141	1	2	0.129	0.739	0	0	1	1	241	252	0.0015	0.0177	78826
chr11_q_arm	11	arm	6744	217	247.4	30.4	1.1401	0.1892	247.73	260.33	12.6	1.051	0.072	1.47	0.47	-1	0.32	-1.645	1.6	1.87	0.27	1.169	0.225	467.8	510.07	42.27	1.09	0.125	220	244	0.0002	0.0367	250	261	0.051	0.186	2	0	0.001	0.116	2	2	0.5085	1	462	506	0.0023	0.0248	182329
chr14_q_arm	14	arm	7813	290.4	312.47	22.1	1.076	0.1057	258.33	274.67	16.3	1.063	0.088	1.13	1.2	0.1	1.062	0.087	0.8	1.33	0.53	1.663	0.733	550.66	589.67	39.01	1.071	0.099	292	317	0.0016	0.0463	256	277	0.004	0.04	1	1	1	1	0	1	0.1565	1	552	593	0.0026	0.026	204940
chr3_q_arm	3	arm	8777	322.4	352.4	30	1.0931	0.1284	294.07	317.13	23.1	1.078	0.109	1.93	1.93	0	1	0	0.6	0.67	0.07	1.117	0.159	619	672.13	53.13	1.086	0.119	325	351	0.0089	0.091	292	319	0.015	0.083	2	2	0.862	1	0	1	0.784	1	615	666	0.0028	0.026	249329
chr2_p_arm	2	arm	9112	321.93	343	21.1	1.0654	0.0915	299.8	325.6	25.8	1.086	0.119	0.93	1.73	0.8	1.86	0.895	0.4	0.67	0.27	1.675	0.744	623.06	671	47.94	1.077	0.107	321	345	0.0151	0.0924	298	325	0.001	0.029	1	2	0.04	0.739	0	0	0.3798	1	624	667	0.003	0.026	213133
chr4_q_arm	4	arm	12092	450.73	469.4	18.7	1.0414	0.0586	442.87	471.93	29.1	1.066	0.092	3.27	2.53	-0.7	0.774	-0.37	0.93	0.73	-0.2	0.785	-0.349	897.8	944.59	46.79	1.052	0.073	449	465	0.0563	0.2152	439	473	0.004	0.04	3	2	0.155	0.739	1	1	0.4344	1	898	943	0.0032	0.026	361437
chr12_q_arm	12	arm	9498	350.13	376.27	26.1	1.0747	0.1039	349.2	366.53	17.3	1.05	0.07	1.73	1.33	-0.4	0.769	-0.379	1.47	1.33	-0.14	0.905	-0.144	702.53	745.46	42.93	1.061	0.086	350	377	0.0017	0.0463	353	362	0.036	0.145	1	1	0.467	0.987	1	1	0.5539	1	703	746	0.0032	0.026	209011
chr15_q_arm	15	arm	7276	242.6	253.33	10.7	1.0442	0.0624	233	251.6	18.6	1.08	0.111	0.33	0.4	0.1	1.212	0.278	0.27	0.33	0.06	1.222	0.29	476.2	505.66	29.46	1.062	0.087	242	251	0.1522	0.3424	228	252	0.002	0.033	0	0	0.728	1	0	0	0.7147	1	467	512	0.0037	0.0268	168137
chr8_p_arm	8	arm	5862	207.73	222.8	15.1	1.0725	0.101	220.87	236.8	15.9	1.072	0.1	0.47	0.53	0.1	1.128	0.173	0	0.07	0.07	NA	NA	429.07	460.2	31.13	1.073	0.101	208	231	0.0308	0.1519	221	232	0.003	0.038	0	0	1	1	0	0	0.3506	1	427	464	0.0037	0.0268	139952
chr7_q_arm	7	arm	11107	387.67	415.2	27.5	1.071	0.099	393.87	424.6	30.7	1.078	0.108	3.33	3.33	0	1	0	0.2	0.67	0.47	3.35	1.744	785.07	843.8	58.73	1.075	0.104	386	413	0.0032	0.0464	399	426	0.009	0.06	3	3	0.876	1	0	0	0.0897	1	787	838	0.0039	0.0274	210799
chr10_q_arm	10	arm	9781	333.67	357	23.3	1.0699	0.0975	317.53	332.33	14.8	1.047	0.066	0.87	0.87	0	1	0	1	1.27	0.27	1.27	0.345	653.07	691.47	38.4	1.059	0.082	332	357	0.0021	0.0463	315	336	0.034	0.145	1	1	0.846	1	1	1	0.5726	1	654	696	0.0042	0.028	208040
chrX_p_arm	X	arm	6245	194.27	225.47	31.2	1.1606	0.2149	135.73	159.27	23.5	1.173	0.231	1.13	0.93	-0.2	0.823	-0.281	0.53	0.93	0.4	1.755	0.811	331.66	386.6	54.94	1.166	0.221	188	234	0.0095	0.091	134	162	0.008	0.06	1	1	0.47	0.987	1	1	0.072	1	321	404	0.0045	0.0286	71363
chr1_q_arm	1	arm	8651	302.27	316.6	14.3	1.0474	0.0668	292.13	307.27	15.1	1.052	0.073	3.07	2.47	-0.6	0.805	-0.314	1.6	1.13	-0.47	0.706	-0.502	599.07	627.47	28.4	1.047	0.067	304	310	0.0127	0.0924	290	310	0.005	0.043	3	2	0.129	0.739	1	1	0.5173	1	592	636	0.007	0.0426	233131
chr18_q_arm	18	arm	7647	260.87	274.07	13.2	1.0506	0.0712	249	263.8	14.8	1.059	0.083	0.53	0.73	0.2	1.377	0.462	0	0.07	0.07	NA	NA	510.4	538.67	28.27	1.055	0.078	262	271	0.0851	0.2892	247	262	0.009	0.06	0	1	0.477	0.987	0	0	0.3506	1	510	538	0.0074	0.0437	142452
chr4_p_arm	4	arm	6012	204.47	220.2	15.7	1.0769	0.1069	227.6	238.27	10.7	1.047	0.066	0.53	0.53	0	1	0	0.2	0.27	0.07	1.35	0.433	432.8	459.27	26.47	1.061	0.086	204	215	0.0134	0.0924	226	238	0.114	0.307	0	0	1	1	0	0	0.692	1	429	452	0.0113	0.0634	131472
chr17_pericent_q	17	q	196	13.33	13.53	0.2	1.015	0.0215	5.93	8.47	2.5	1.428	0.514	0.13	0.27	0.1	2.077	1.054	0.2	0.2	0	1	0	19.59	22.47	2.88	1.147	0.198	14	14	0.9322	0.9758	6	8	0.009	0.06	0	0	0.386	0.902	0	0	1	1	19	22	0.0116	0.0634	6634
chrX_q_arm	X	arm	5418	128.6	170.73	42.1	1.3276	0.4088	144.93	189.33	44.4	1.306	0.386	0.67	1.2	0.5	1.791	0.841	1.53	1.93	0.4	1.261	0.335	275.73	363.19	87.46	1.317	0.397	120	181	0.012	0.0924	134	191	0.022	0.107	1	1	0.037	0.739	1	2	0.3257	1	260	382	0.0128	0.0674	126071
chr17_q_arm	17	arm	6505	241.8	251.73	9.9	1.0411	0.0581	204.07	224.4	20.3	1.1	0.137	5.8	4.33	-1.5	0.747	-0.422	0.2	0.33	0.13	1.65	0.722	451.87	480.79	28.92	1.064	0.089	243	249	0.1298	0.3413	203	227	0.003	0.038	6	5	0.033	0.739	0	0	0.632	1	454	479	0.0135	0.0689	100194
chr9_p_arm	9	arm	2940	108.47	115.47	7	1.0645	0.0902	112.53	122.73	10.2	1.091	0.125	1.47	1.27	-0.2	0.864	-0.211	0	0	0	NA	NA	222.47	239.47	17	1.076	0.106	107	115	0.0323	0.1545	114	123	0.036	0.145	1	1	0.406	0.923	0	0	1	1	220	239	0.0143	0.0706	121150
chr5_q_arm	5	arm	10370	366.6	389.2	22.6	1.0616	0.0863	358.67	377.67	19	1.053	0.074	1.27	2.13	0.9	1.677	0.746	0.8	1	0.2	1.25	0.322	727.34	770	42.66	1.059	0.082	377	390	0.0144	0.0924	359	374	0.056	0.191	1	2	0.019	0.732	1	1	0.4157	1	727	763	0.0161	0.0748	308039
chr20_centromere	20	centromere	7381	238.4	278.93	40.5	1.17	0.2265	132.2	158.47	26.3	1.199	0.261	20.8	27.53	6.7	1.324	0.404	0	0	0	NA	NA	391.4	464.93	73.53	1.188	0.248	226	273	0.0511	0.2076	131	155	0.002	0.033	22	27	0.056	0.739	0	0	1	1	391	463	0.0161	0.0748	23034
chr22_q_arm	22	arm	5345	185.07	200.47	15.4	1.0832	0.1153	208.07	220.87	12.8	1.062	0.086	0.93	1.27	0.3	1.366	0.45	0	0	0	NA	NA	394.07	422.61	28.54	1.072	0.101	185	203	0.0134	0.0924	204	219	0.135	0.356	1	1	0.328	0.88	0	0	1	1	395	413	0.018	0.081	65248
chr19_q_arm	19	arm	4270	170.67	172.73	2.1	1.0121	0.0173	153.73	166.27	12.5	1.082	0.113	3.07	4.47	1.4	1.456	0.542	0	0	0	NA	NA	327.47	343.47	16	1.049	0.069	169	170	0.6933	0.8554	152	165	0.005	0.043	3	5	0.015	0.732	0	0	1	1	319	341	0.019	0.083	64661
chr7_centromere	7	centromere	5828	196.07	254.53	58.5	1.2982	0.3765	64.33	76.2	11.9	1.185	0.244	4.2	5.07	0.9	1.207	0.272	0	0	0	NA	NA	264.6	335.8	71.2	1.269	0.344	199	287	0.0815	0.2834	67	80	0.056	0.191	3	4	0.543	0.987	0	0	1	1	256	351	0.0202	0.0858	23989
chr5_pericent_q	5	q	289	11.2	12.8	1.6	1.1429	0.1926	7.87	10.4	2.5	1.321	0.402	0	0	0	NA	NA	0	0	0	NA	NA	19.07	23.2	4.13	1.217	0.283	11	12	0.1316	0.3413	7	10	0.024	0.112	0	0	1	1	0	0	1	1	18	23	0.0258	0.1062	13432
chr19_p_arm	19	arm	4904	162.6	173.73	11.1	1.0685	0.0955	153.87	166.93	13.1	1.085	0.118	0.33	0.53	0.2	1.606	0.684	0.87	0.8	-0.07	0.92	-0.121	317.67	341.99	24.32	1.077	0.106	163	173	0.0179	0.1013	148	163	0.065	0.206	0	0	0.28	0.88	1	1	0.653	1	310	335	0.0264	0.1062	32415
chr6_pericent_q	6	q	360	20.47	22.27	1.8	1.0879	0.1216	11.2	14.27	3.1	1.274	0.349	0	0	0	NA	NA	0	0	0	NA	NA	31.67	36.54	4.87	1.154	0.206	21	23	0.212	0.4326	12	15	0.013	0.078	0	0	1	1	0	0	1	1	31	38	0.036	0.1381	14579
chr7_p_arm	7	arm	6623	234.27	242.47	8.2	1.035	0.0496	238.4	252.93	14.5	1.061	0.085	0.4	0.6	0.2	1.5	0.585	0.73	0.87	0.14	1.192	0.253	473.8	496.87	23.07	1.049	0.069	234	242	0.1453	0.3424	241	251	0.051	0.186	0	0	0.901	1	1	1	0.4894	1	470	492	0.0361	0.1381	156136
chrX_pericent_p	X	p	277	7.27	10.2	2.9	1.403	0.4885	9.13	11	1.9	1.205	0.269	0	0	0	NA	NA	0	0	0	NA	NA	16.4	21.2	4.8	1.293	0.37	7	9	0.0189	0.103	10	12	0.18	0.416	0	0	1	1	0	0	1	1	16	21	0.0377	0.1408	5638
chr21_pericent_q	21	q	470	15	16.2	1.2	1.08	0.111	17.93	21.2	3.3	1.182	0.242	0.07	0.13	0.1	1.857	0.893	0	0	0	NA	NA	33	37.53	4.53	1.137	0.186	15	16	0.3912	0.6286	17	21	0.013	0.078	0	0	0.577	0.987	0	0	1	1	33	38	0.0455	0.1659	14660
chr19_pericent_p	19	p	719	28.93	29.53	0.6	1.0207	0.0296	20.87	24.53	3.7	1.175	0.233	0	0.07	0.1	NA	NA	0.87	0.8	-0.07	0.92	-0.121	50.67	54.93	4.26	1.084	0.116	29	30	0.6767	0.8418	20	25	0.002	0.033	0	0	0.351	0.88	1	1	0.653	1	51	55	0.0482	0.1715	8384
chr9_pericent_q	9	q	306	12.93	10.93	-2	0.8453	-0.2424	10.93	9.53	-1.4	0.872	-0.198	0	0.07	0.1	NA	NA	0	0	0	NA	NA	23.86	20.53	-3.33	0.86	-0.217	13	11	0.0195	0.103	11	11	0.316	0.549	0	0	0.351	0.88	0	0	1	1	25	22	0.0506	0.1761	10861
chr14_telo_q	14	q	254	14.33	18.13	3.8	1.2652	0.3393	10.47	13	2.5	1.242	0.312	1	1	0	1	0	0	0	0	NA	NA	25.8	32.13	6.33	1.245	0.317	16	19	0.0413	0.1805	11	13	0.109	0.298	1	1	1	1	0	0	1	1	27	33	0.0535	0.1819	5401
chr10_telo_p	10	p	956	21.67	24	2.3	1.1075	0.1473	22.4	26.6	4.2	1.188	0.248	0	0	0	NA	NA	0	0	0	NA	NA	44.07	50.6	6.53	1.148	0.199	20	24	0.3496	0.5943	22	27	0.021	0.101	0	0	1	1	0	0	1	1	45	51	0.0614	0.2043	1936
chrY_q_arm	Y	arm	2930	169.07	93.13	-75.9	0.5508	-0.8603	30.87	20.6	-10.3	0.667	-0.584	5.07	2.73	-2.3	0.538	-0.893	0	0	0	NA	NA	205.01	116.46	-88.55	0.568	-0.816	190	0	0.0545	0.2137	35	0	0.472	0.709	5	0	0.077	0.739	0	0	1	1	230	0	0.066	0.2145	21006
chr8_telo_p	8	p	968	34.47	36.27	1.8	1.0522	0.0734	36.67	38.53	1.9	1.051	0.071	0	0.13	0.1	NA	NA	0	0	0	NA	NA	71.14	74.93	3.79	1.053	0.075	35	37	0.4291	0.6655	36	40	0.081	0.242	0	0	0.164	0.739	0	0	1	1	72	77	0.0673	0.2145	3945
chr12_telo_p	12	p	395	11.8	13.07	1.3	1.1076	0.1475	13.27	14.53	1.3	1.095	0.131	0.2	0.13	-0.1	0.65	-0.621	0	0	0	NA	NA	25.27	27.73	2.46	1.097	0.134	12	14	0.1062	0.3413	14	15	0.268	0.51	0	0	0.653	1	0	0	1	1	25	28	0.0704	0.2197	2204
chr15_pericent_q	15	q	940	26.67	27.8	1.1	1.0424	0.0599	23.4	26.2	2.8	1.12	0.163	0	0	0	NA	NA	0	0	0	NA	NA	50.07	54	3.93	1.078	0.109	29	28	0.6306	0.8108	24	26	0.039	0.154	0	0	1	1	0	0	1	1	49	53	0.0841	0.2503	11251
chr16_q_arm	16	arm	5575	196.6	203.4	6.8	1.0346	0.0491	207.47	212.6	5.1	1.025	0.035	0.47	0.53	0.1	1.128	0.173	2.2	1.8	-0.4	0.818	-0.29	406.74	418.33	11.59	1.028	0.041	197	207	0.146	0.3424	206	214	0.212	0.433	0	0	0.697	1	2	2	0.322	1	407	425	0.0849	0.2503	103646
chr1_p_arm	1	arm	12288	435.87	459.6	23.7	1.0544	0.0765	390.6	406.8	16.2	1.041	0.059	2.93	3.47	0.5	1.184	0.244	0.93	0.87	-0.06	0.935	-0.096	830.33	870.74	40.41	1.049	0.069	442	464	0.1197	0.3413	396	412	0.049	0.186	2	3	0.41	0.923	1	1	0.8773	1	840	872	0.0851	0.2503	244497
chrY_centromere	Y	centromere	353	21.13	11.8	-9.3	0.5584	-0.8405	4.8	3.53	-1.3	0.735	-0.443	1.13	0.53	-0.6	0.469	-1.092	0	0	0	NA	NA	27.06	15.86	-11.2	0.586	-0.771	26	0	0.0516	0.2076	5	0	0.189	0.425	1	0	0.061	0.739	0	0	1	1	33	0	0.0867	0.2503	1567
chr13_telo_q	13	q	1728	57.07	60.6	3.5	1.0619	0.0866	55.2	61.13	5.9	1.107	0.147	0	0	0	NA	NA	0	0	0	NA	NA	112.27	121.73	9.46	1.084	0.117	56	62	0.1905	0.4073	54	66	0.064	0.206	0	0	1	1	0	0	1	1	113	129	0.0887	0.2513	2366
chr18_pericent_p	18	p	405	17.93	19.4	1.5	1.082	0.1137	17.6	18.2	0.6	1.034	0.048	0	0	0	NA	NA	0	0	0	NA	NA	35.53	37.6	2.07	1.058	0.082	18	19	0.1311	0.3413	18	18	0.361	0.593	0	0	1	1	0	0	1	1	36	37	0.0952	0.2647	13605
chr20_pericent_p	20	p	403	16.93	19.33	2.4	1.1418	0.1913	13.87	15.8	1.9	1.139	0.188	0.13	0.2	0.1	1.538	0.621	0	0	0	NA	NA	30.93	35.33	4.4	1.142	0.192	17	18	0.1499	0.3424	14	16	0.219	0.441	0	0	0.653	1	0	0	1	1	31	34	0.1044	0.2837	10391
chr10_centromere	10	centromere	8440	342.13	408.07	65.9	1.1927	0.2543	99.27	114.07	14.8	1.149	0.2	4.13	5.47	1.3	1.324	0.405	0	0	0	NA	NA	445.53	527.61	82.08	1.184	0.244	286	455	0.1102	0.3413	109	109	0.28	0.511	4	5	0.139	0.739	0	0	1	1	402	578	0.1057	0.2837	13468
chr6_telo_q	6	q	1574	50.2	55.4	5.2	1.1036	0.1422	42.2	44.53	2.3	1.055	0.078	0.07	0.13	0.1	1.857	0.893	0	0	0	NA	NA	92.47	100.06	7.59	1.082	0.114	47	55	0.0739	0.266	43	43	0.429	0.677	0	0	0.577	0.987	0	0	1	1	90	101	0.11	0.2864	2682
chr10_telo_q	10	q	1282	30.53	33.6	3.1	1.1006	0.1382	41.27	45.2	3.9	1.095	0.131	0.07	0.13	0.1	1.857	0.893	0	0	0	NA	NA	71.87	78.93	7.06	1.098	0.135	31	33	0.1443	0.3424	39	46	0.299	0.538	0	0	0.577	0.987	0	0	1	1	67	77	0.1139	0.2864	1796
chr4_telo_p	4	p	416	16.6	14.8	-1.8	0.8916	-0.1656	16	13.6	-2.4	0.85	-0.234	0	0	0	NA	NA	0	0	0	NA	NA	32.6	28.4	-4.2	0.871	-0.199	16	15	0.1073	0.3413	16	15	0.204	0.433	0	0	1	1	0	0	1	1	32	28	0.1141	0.2864	1706
chr7_pericent_q	7	q	408	13.47	15.4	1.9	1.1433	0.1932	16.27	17.73	1.5	1.09	0.124	0.07	0.13	0.1	1.857	0.893	0	0	0	NA	NA	29.81	33.26	3.45	1.116	0.158	13	16	0.1279	0.3413	16	17	0.338	0.568	0	0	0.577	0.987	0	0	1	1	29	35	0.1186	0.2864	10926
chr9_telo_q	9	q	1025	23.13	23.4	0.3	1.0117	0.0167	20.2	23.93	3.7	1.185	0.244	0.07	0.07	0	1	0	0	0	0	NA	NA	43.4	47.4	4	1.092	0.127	23	25	0.5056	0.7315	19	26	0.196	0.428	0	0	1	1	0	0	1	1	44	49	0.1193	0.2864	1475
chr11_p_arm	11	arm	6128	247.47	259.47	12	1.0485	0.0683	202.67	208.73	6.1	1.03	0.043	0.8	0.8	0	1	0	0.2	0.67	0.47	3.35	1.744	451.14	469.67	18.53	1.041	0.058	247	259	0.0379	0.173	204	213	0.319	0.549	1	1	0.819	1	0	1	0.0505	1	463	467	0.1196	0.2864	126556
chr19_centromere	19	centromere	10340	407.47	532.33	124.9	1.3064	0.3856	58.93	68.6	9.7	1.164	0.219	4	4.53	0.5	1.133	0.18	0	0	0	NA	NA	470.4	605.46	135.06	1.287	0.364	435	533	0.1466	0.3424	57	69	0.015	0.083	4	4	0.933	1	0	0	1	1	495	606	0.1198	0.2864	31952
chrY_pericent_q	Y	q	15	1.07	0.67	-0.4	0.6262	-0.6754	1.4	0.73	-0.7	0.521	-0.939	0	0	0	NA	NA	0	0	0	NA	NA	2.47	1.4	-1.07	0.567	-0.819	1	0	0.1917	0.4073	1	0	0.076	0.233	0	0	1	1	0	0	1	1	3	0	0.1283	0.302	719
chr14_pericent_q	14	q	754	30.93	32.07	1.1	1.0369	0.0522	25.27	27.67	2.4	1.095	0.131	0	0	0	NA	NA	0	0.07	0.07	NA	NA	56.2	59.81	3.61	1.064	0.09	32	33	0.2025	0.4238	25	28	0.067	0.209	0	0	1	1	0	0	0.3506	1	56	61	0.1348	0.3125	14424
chr20_p_arm	20	arm	2904	117.13	119.13	2	1.0171	0.0244	79.8	86.6	6.8	1.085	0.118	0.13	0.27	0.1	2.077	1.054	0.87	0.87	0	1	0	197.93	206.87	8.94	1.045	0.064	118	120	0.5607	0.7528	79	85	0.016	0.084	0	0	0.386	0.902	1	1	1	1	201	205	0.1402	0.3156	63263
chr20_telo_q	20	q	945	31.93	34.67	2.7	1.0858	0.1188	40.67	40.73	0.1	1.001	0.002	0.07	0.13	0.1	1.857	0.893	0	0	0	NA	NA	72.67	75.53	2.86	1.039	0.056	31	35	0.118	0.3413	40	42	0.739	0.92	0	0	0.577	0.987	0	0	1	1	74	78	0.1403	0.3156	1659
chr2_pericent_q	2	q	142	10.73	11.8	1.1	1.0997	0.1371	8.53	8.6	0.1	1.008	0.012	0.33	0.33	0	1	0	0	0	0	NA	NA	19.59	20.73	1.14	1.058	0.082	10	11	0.1512	0.3424	8	8	0.767	0.929	0	0	1	1	0	0	1	1	20	21	0.1521	0.3331	9929
chr15_centromere	15	centromere	11345	438.33	479.2	40.9	1.0932	0.1286	202.87	210	7.1	1.035	0.05	6.73	6.13	-0.6	0.911	-0.135	0	0	0	NA	NA	647.93	695.33	47.4	1.073	0.102	428	487	0.1248	0.3413	198	218	0.534	0.749	6	6	0.365	0.892	0	0	1	1	639	729	0.1524	0.3331	39213
chr12_pericent_q	12	q	326	13.27	16.2	2.9	1.2208	0.2878	13.93	14.2	0.3	1.019	0.028	0	0.07	0.1	NA	NA	0.53	0.27	-0.26	0.509	-0.973	27.73	30.74	3.01	1.109	0.149	14	17	0.0167	0.0985	14	13	0.884	0.957	0	0	0.351	0.88	1	0	0.1495	1	30	31	0.1625	0.3502	13340
chrX_pericent_q	X	q	207	4.2	6.07	1.9	1.4452	0.5313	3	6.07	3.1	2.023	1.017	0	0.07	0.1	NA	NA	0	0	0	NA	NA	7.2	12.21	5.01	1.696	0.762	5	6	0.0748	0.266	3	4	0.18	0.416	0	0	0.351	0.88	0	0	1	1	6	10	0.1696	0.3575	4752
chr5_telo_p	5	p	1883	55.4	60.87	5.5	1.0987	0.1358	57	58.73	1.7	1.03	0.043	1.6	1.47	-0.1	0.919	-0.122	0	0	0	NA	NA	114	121.07	7.07	1.062	0.087	52	64	0.1462	0.3424	57	57	0.693	0.906	1	1	0.741	1	0	0	1	1	111	122	0.1706	0.3575	2991
chr10_pericent_q	10	q	419	17.2	16.87	-0.3	0.9808	-0.0279	15.8	17.87	2.1	1.131	0.178	0	0.13	0.1	NA	NA	0	0	0	NA	NA	33	34.87	1.87	1.057	0.08	18	18	0.8669	0.9355	15	18	0.095	0.275	0	0	0.164	0.739	0	0	1	1	32	35	0.1757	0.3613	11709
chr16_telo_q	16	q	829	27.33	29	1.7	1.0611	0.0856	24.6	26.27	1.7	1.068	0.095	0	0.13	0.1	NA	NA	0	0	0	NA	NA	51.93	55.4	3.47	1.067	0.093	30	30	0.382	0.6246	25	27	0.252	0.496	0	0	0.164	0.739	0	0	1	1	52	58	0.1771	0.3613	1862
chr12_pericent_p	12	p	503	19.73	17.87	-1.9	0.9057	-0.1429	25.27	24.73	-0.5	0.979	-0.031	0	0	0	NA	NA	0	0	0	NA	NA	45	42.6	-2.4	0.947	-0.079	19	17	0.1444	0.3424	26	25	0.49	0.726	0	0	1	1	0	0	1	1	46	43	0.183	0.3659	14425
chr16_p_arm	16	arm	4819	170.93	179.8	8.9	1.0519	0.073	160	165.13	5.1	1.032	0.046	1.33	1.53	0.2	1.15	0.202	0.93	0.93	0	1	0	333.19	347.39	14.2	1.043	0.06	171	170	0.2994	0.5727	159	168	0.146	0.367	1	2	0.54	0.987	1	1	1	1	328	340	0.1842	0.3659	73352
chr11_pericent_q	11	q	407	10.33	11.13	0.8	1.0774	0.1076	16	18	2	1.125	0.17	0	0.07	0.1	NA	NA	0.47	0.47	0	1	0	26.8	29.67	2.87	1.107	0.147	10	12	0.3161	0.5896	17	18	0.194	0.428	0	0	0.351	0.88	0	0	1	1	27	29	0.204	0.4001	13117
chr8_telo_q	8	q	596	22.2	22.33	0.1	1.0059	0.0084	13.33	15.27	1.9	1.146	0.196	0.07	0.07	0	1	0	0	0	0	NA	NA	35.6	37.67	2.07	1.058	0.082	21	22	0.8348	0.9355	13	15	0.058	0.192	0	0	1	1	0	0	1	1	35	38	0.2112	0.4091	1236
chr15_telo_q	15	q	988	34.4	32.6	-1.8	0.9477	-0.0775	22.13	18.53	-3.6	0.837	-0.256	0	0	0	NA	NA	0	0	0	NA	NA	56.53	51.13	-5.4	0.904	-0.145	35	32	0.7234	0.8784	22	17	0.088	0.259	0	0	1	1	0	0	1	1	57	51	0.2202	0.416	2590
chr6_centromere	6	centromere	586	20.87	22.2	1.3	1.0637	0.0891	27.67	30.13	2.5	1.089	0.123	0.33	0.13	-0.2	0.394	-1.344	0	0	0	NA	NA	48.87	52.46	3.59	1.073	0.102	22	22	0.6029	0.7884	28	29	0.15	0.369	0	0	0.19	0.809	0	0	1	1	52	53	0.2202	0.416	10724
chr13_pericent_q	13	q	646	26.6	29.93	3.3	1.1252	0.1702	23	22.53	-0.5	0.98	-0.03	0	0	0	NA	NA	0	0	0	NA	NA	49.6	52.46	2.86	1.058	0.081	28	30	0.0294	0.15	24	22	0.708	0.911	0	0	1	1	0	0	1	1	50	52	0.2281	0.4208	15383
chr16_telo_p	16	p	1260	30.53	32.93	2.4	1.0786	0.1092	39.67	44	4.3	1.109	0.149	0.33	0	-0.3	NA	NA	0	0	0	NA	NA	70.53	76.93	6.4	1.091	0.125	31	34	0.205	0.4238	40	41	0.253	0.496	0	0	0.017	0.732	0	0	1	1	69	77	0.2283	0.4208	1671
chr1_pericent_p	1	p	328	20.13	22.67	2.5	1.1262	0.1714	10.33	11.2	0.9	1.084	0.117	1.4	1.47	0.1	1.05	0.07	0	0	0	NA	NA	31.86	35.34	3.48	1.109	0.15	21	22	0.1278	0.3413	10	11	0.315	0.549	1	1	0.714	1	0	0	1	1	34	34	0.2347	0.4276	10467
chr4_pericent_q	4	q	468	15.67	16.93	1.3	1.0804	0.1116	21	22.2	1.2	1.057	0.08	0	0.13	0.1	NA	NA	0	0	0	NA	NA	36.67	39.26	2.59	1.071	0.098	16	17	0.3379	0.5896	20	22	0.202	0.433	0	0	0.164	0.739	0	0	1	1	36	39	0.2436	0.4367	14757
chr2_centromere	2	centromere	9707	504.73	543.4	38.7	1.0766	0.1065	104.07	121.27	17.2	1.165	0.221	4	5.67	1.7	1.418	0.503	0	0	0	NA	NA	612.8	670.34	57.54	1.094	0.129	493	550	0.3837	0.6246	104	122	0.054	0.191	4	5	0.219	0.837	0	0	1	1	599	676	0.2455	0.4367	18165
chr21_telo_q	21	q	1021	37.07	37.8	0.7	1.0197	0.0281	35.47	36.6	1.1	1.032	0.045	0	0.13	0.1	NA	NA	0	0	0	NA	NA	72.54	74.53	1.99	1.027	0.039	37	38	0.574	0.759	35	35	0.739	0.92	0	0	0.164	0.739	0	0	1	1	72	74	0.2527	0.4368	2144
chr7_telo_p	7	p	1395	38.4	40.6	2.2	1.0573	0.0804	49.93	53.27	3.3	1.067	0.093	0	0	0	NA	NA	0	0	0	NA	NA	88.33	93.87	5.54	1.063	0.088	38	40	0.4297	0.6655	48	53	0.271	0.51	0	0	1	1	0	0	1	1	85	95	0.2531	0.4368	2596
chr3_telo_p	3	p	187	6	6.13	0.1	1.0217	0.0309	4.13	4.6	0.5	1.114	0.155	0	0	0	NA	NA	0	0	0	NA	NA	10.13	10.73	0.6	1.059	0.083	6	6	0.865	0.9355	4	5	0.511	0.73	0	0	1	1	0	0	1	1	10	11	0.2541	0.4368	3320
chr17_p_arm	17	arm	4845	169.4	176.27	6.9	1.0406	0.0574	151.27	153.93	2.7	1.018	0.025	0.53	0.4	-0.1	0.755	-0.406	0.53	0.67	0.14	1.264	0.338	321.73	331.27	9.54	1.03	0.042	166	175	0.1245	0.3413	149	154	0.455	0.703	0	0	0.534	0.987	0	1	0.5645	1	320	330	0.2626	0.4464	44491
chr5_telo_q	5	q	762	23.8	23.2	-0.6	0.9748	-0.0368	22.8	24.8	2	1.088	0.121	0.47	0.33	-0.1	0.702	-0.51	0	0	0	NA	NA	47.07	48.33	1.26	1.027	0.038	24	25	0.9666	0.9794	23	25	0.156	0.378	0	0	0.64	1	0	0	1	1	48	49	0.2698	0.4537	2536
chr2_telo_p	2	p	870	30.07	30.47	0.4	1.0133	0.0191	26	28.87	2.9	1.11	0.151	0	0.13	0.1	NA	NA	0	0	0	NA	NA	56.07	59.47	3.4	1.061	0.085	29	31	0.9501	0.9758	26	28	0.182	0.416	0	0	0.164	0.739	0	0	1	1	56	58	0.3273	0.5401	2987
chr6_telo_p	6	p	480	12.27	14.33	2.1	1.1679	0.2239	11.47	11.73	0.3	1.023	0.032	0.47	0.33	-0.1	0.702	-0.51	0	0	0	NA	NA	24.21	26.39	2.18	1.09	0.124	12	14	0.1272	0.3413	12	12	0.868	0.957	0	0	0.655	1	0	0	1	1	25	26	0.3283	0.5401	2570
chr17_pericent_p	17	p	278	15	16.27	1.3	1.0847	0.1173	11.07	11.13	0.1	1.005	0.008	0	0.13	0.1	NA	NA	0.13	0.33	0.2	2.538	1.344	26.2	27.86	1.66	1.063	0.089	16	16	0.3624	0.6027	10	11	0.85	0.957	0	0	0.164	0.739	0	0	0.3554	1	26	28	0.3389	0.5516	8022
chrY_pericent_p	Y	p	1049	34.8	37.8	3	1.0862	0.1193	29.47	28.67	-0.8	0.973	-0.04	0	0.07	0.1	NA	NA	0	0	0	NA	NA	64.27	66.54	2.27	1.035	0.05	35	36	0.4422	0.6699	28	30	0.771	0.929	0	0	0.351	0.88	0	0	1	1	62	66	0.3498	0.5587	1121
chr7_pericent_p	7	p	337	15.07	14.8	-0.3	0.9821	-0.0261	17.6	17.13	-0.5	0.973	-0.039	0.07	0.07	0	1	0	0	0	0	NA	NA	32.74	32	-0.74	0.977	-0.033	15	14	0.2861	0.5685	18	16	0.884	0.957	0	0	1	1	0	0	1	1	33	30	0.3592	0.5587	16017
chr5_p_arm	5	arm	6668	216.87	224.33	7.5	1.0344	0.0488	245.67	250.73	5.1	1.021	0.029	2.67	2	-0.7	0.749	-0.417	0.33	0.2	-0.13	0.606	-0.722	465.54	477.26	11.72	1.025	0.036	213	228	0.1581	0.3499	245	250	0.835	0.957	2	2	0.073	0.739	0	0	0.4326	1	467	467	0.3613	0.5587	119114
chr21_centromere	21	centromere	9268	384.53	390.67	6.1	1.016	0.0229	178.13	194.27	16.1	1.091	0.125	3.27	1.8	-1.5	0.55	-0.861	0	0.07	0.07	NA	NA	565.93	586.81	20.88	1.037	0.052	352	380	0.8034	0.9355	181	191	0.101	0.286	2	2	0.309	0.88	0	0	0.3506	1	545	578	0.3614	0.5587	30738
chr16_centromere	16	centromere	9931	322.4	348.93	26.5	1.0823	0.1141	154.67	173	18.3	1.119	0.162	19.6	24.8	5.2	1.265	0.339	0.07	0.07	0	1	0	496.74	546.8	50.06	1.101	0.139	329	335	0.7716	0.9151	156	170	0.407	0.662	21	23	0.105	0.739	0	0	1	1	501	511	0.3615	0.5587	20836
chr17_telo_q	17	q	1264	47	48.13	1.1	1.024	0.0343	32.33	34.87	2.5	1.079	0.109	0.13	0.07	-0.1	0.538	-0.893	0	0	0	NA	NA	79.46	83.07	3.61	1.045	0.064	48	48	0.6471	0.8251	33	33	0.349	0.581	0	0	0.577	0.987	0	0	1	1	82	83	0.3716	0.5686	1648
chr11_pericent_p	11	p	252	17.13	17.33	0.2	1.0117	0.0167	10.73	10.73	0	1	0	0	0	0	NA	NA	0	0	0	NA	NA	27.86	28.06	0.2	1.007	0.01	17	18	0.436	0.6671	10	12	0.867	0.957	0	0	1	1	0	0	1	1	26	29	0.3803	0.5699	8244
chr22_telo_q	22	q	689	23.13	22.4	-0.7	0.9684	-0.0463	23.93	27.53	3.6	1.15	0.202	0.07	0.07	0	1	0	0	0	0	NA	NA	47.13	50	2.87	1.061	0.085	23	23	0.7391	0.8904	24	29	0.164	0.391	0	0	1	1	0	0	1	1	49	50	0.3827	0.5699	1747
chr22_centromere	22	centromere	21569	792.2	880.33	88.1	1.1112	0.1522	311.27	319.13	7.9	1.025	0.036	8.8	8	-0.8	0.909	-0.138	0	0	0	NA	NA	1112.27	1207.46	95.19	1.086	0.118	773	913	0.2901	0.5691	312	312	0.74	0.92	8	8	0.518	0.987	0	0	1	1	1099	1210	0.3837	0.5699	57741
chr10_pericent_p	10	p	371	13.13	15.6	2.5	1.1881	0.2487	10.87	11.8	0.9	1.086	0.118	0.07	0	-0.1	NA	NA	1.4	0.67	-0.73	0.479	-1.063	25.47	28.07	2.6	1.102	0.14	13	15	0.0384	0.173	12	13	0.505	0.729	0	0	0.351	0.88	2	0	0.0152	1	28	28	0.4039	0.5904	11055
chr4_pericent_p	4	p	288	15.67	15.67	0	1	0	12.87	11.87	-1	0.922	-0.117	0	0	0	NA	NA	0	0	0	NA	NA	28.54	27.54	-1	0.965	-0.051	16	16	0.9499	0.9758	12	12	0.276	0.51	0	0	1	1	0	0	1	1	29	28	0.4052	0.5904	11938
chr1_pericent_q	1	q	323	20.87	20.07	-0.8	0.9617	-0.0564	6.27	5.67	-0.6	0.904	-0.145	0.47	0.13	-0.3	0.277	-1.854	0	0	0	NA	NA	27.61	25.87	-1.74	0.937	-0.094	21	21	0.8029	0.9355	6	6	0.644	0.853	0	0	0.053	0.739	0	0	1	1	27	27	0.4294	0.6094	9253
chr19_pericent_q	19	q	432	12.8	12.73	-0.1	0.9945	-0.0079	15.2	17	1.8	1.118	0.161	0	0	0	NA	NA	0	0	0	NA	NA	28	29.73	1.73	1.062	0.086	12	12	0.9496	0.9758	16	17	0.138	0.357	0	0	1	1	0	0	1	1	28	28	0.4294	0.6094	9870
chr3_telo_q	3	q	821	23.67	24.2	0.5	1.0224	0.0319	20.2	20.07	-0.1	0.994	-0.009	0.27	0.4	0.1	1.481	0.567	0	0	0	NA	NA	44.14	44.67	0.53	1.012	0.017	24	23	0.8515	0.9355	19	19	0.983	0.99	0	0	0.64	1	0	0	1	1	44	41	0.4302	0.6094	2376
chrY_p_arm	Y	arm	2887	88.8	96.93	8.1	1.0916	0.1264	72.8	72.8	0	1	0	0.13	0.13	0	1	0	0	0	0	NA	NA	161.73	169.86	8.13	1.05	0.071	91	93	0.3292	0.5896	75	71	0.647	0.853	0	0	1	1	0	0	1	1	167	165	0.4425	0.6212	2089
chr18_centromere	18	centromere	10745	535.47	527.53	-7.9	0.9852	-0.0216	77.47	80.87	3.4	1.044	0.062	1.33	1.33	0	1	0	0.2	0.33	0.13	1.65	0.722	614.47	610.06	-4.41	0.993	-0.01	588	503	0.4306	0.6655	79	78	0.803	0.945	1	1	0.948	1	0	0	0.2719	1	675	589	0.4678	0.6506	20081
chr17_centromere	17	centromere	5416	195.73	227.87	32.1	1.1642	0.2193	99.33	101.4	2.1	1.021	0.03	10.53	15.13	4.6	1.437	0.523	0	0	0	NA	NA	305.59	344.4	38.81	1.127	0.172	214	227	0.3094	0.5844	98	106	0.967	0.99	11	14	0.027	0.739	0	0	1	1	332	344	0.4806	0.6625	15174
chr3_pericent_p	3	p	352	12.2	13.53	1.3	1.109	0.1493	10.4	10.93	0.5	1.051	0.072	0	0	0	NA	NA	0	0	0	NA	NA	22.6	24.46	1.86	1.082	0.114	13	13	0.3363	0.5896	10	11	0.602	0.815	0	0	1	1	0	0	1	1	22	24	0.4915	0.6626	12527
chr2_pericent_p	2	p	474	16.6	19.8	3.2	1.1928	0.2543	17.93	16.07	-1.9	0.896	-0.158	0.13	0.33	0.2	2.538	1.344	0	0	0	NA	NA	34.66	36.2	1.54	1.044	0.063	16	19	0.0503	0.2076	19	16	0.21	0.433	0	0	0.213	0.837	0	0	1	1	34	35	0.4921	0.6626	9825
chr14_centromere	14	centromere	8117	353.93	373.8	19.9	1.0561	0.0788	228.47	235.93	7.5	1.033	0.046	4.93	7.8	2.9	1.582	0.662	0.13	0.2	0.07	1.538	0.621	587.46	617.73	30.27	1.052	0.072	377	376	0.6186	0.802	222	240	0.575	0.786	3	6	0.128	0.739	0	0	0.653	1	609	623	0.4937	0.6626	39351
chr9_pericent_p	9	p	439	14.33	16.2	1.9	1.1305	0.177	16.8	17.07	0.3	1.016	0.023	0.13	0.07	-0.1	0.538	-0.893	0	0	0	NA	NA	31.26	33.34	2.08	1.067	0.093	14	16	0.3583	0.6024	18	17	0.9	0.957	0	0	0.577	0.987	0	0	1	1	32	34	0.5053	0.6629	10376
chr12_centromere	12	centromere	4952	269.67	199.87	-69.8	0.7412	-0.4321	40.8	37.53	-3.3	0.92	-0.121	0.6	0.47	-0.1	0.783	-0.352	0	0	0	NA	NA	311.07	237.87	-73.2	0.765	-0.387	310	162	0.5068	0.7315	42	36	0.708	0.911	1	0	0.527	0.987	0	0	1	1	365	192	0.5067	0.6629	19546
chr9_centromere	9	centromere	51182	1251.2	1346.07	94.9	1.0758	0.1054	646.2	737.87	91.7	1.142	0.191	19.73	24.27	4.5	1.23	0.299	0	0.2	0.2	NA	NA	1917.13	2108.41	191.28	1.1	0.137	1294	1492	0.7089	0.8677	692	821	0.32	0.549	20	22	0.329	0.88	0	0	0.0792	1	2007	2296	0.5069	0.6629	44156
chr18_telo_q	18	q	1680	61.73	60.67	-1.1	0.9828	-0.025	40.87	40.13	-0.7	0.982	-0.026	0	0	0	NA	NA	0	0	0	NA	NA	102.6	100.8	-1.8	0.982	-0.026	63	61	0.8355	0.9355	41	42	0.9	0.957	0	0	1	1	0	0	1	1	105	101	0.5195	0.6684	2547
chr11_telo_p	11	p	1281	44.2	47.07	2.9	1.0649	0.0908	45.6	42.6	-3	0.934	-0.098	0.13	0	-0.1	NA	NA	0.2	0.4	0.2	2	1	90.13	90.07	-0.06	0.999	-0.001	46	48	0.3944	0.6286	46	44	0.212	0.433	0	0	0.164	0.739	0	0	0.2505	1	88	91	0.5199	0.6684	1859
chr1_telo_q	1	q	336	10.6	9.6	-1	0.9057	-0.143	9.4	8.47	-0.9	0.901	-0.15	0	0	0	NA	NA	0	0	0	NA	NA	20	18.07	-1.93	0.904	-0.146	9	9	1	1	9	10	0.719	0.917	0	0	1	1	0	0	1	1	17	17	0.5321	0.6732	3253
chr16_pericent_p	16	p	397	20.07	20.47	0.4	1.0199	0.0285	10.53	11.13	0.6	1.057	0.08	0.4	0.2	-0.2	0.5	-1	0	0	0	NA	NA	31	31.8	0.8	1.026	0.037	20	20	0.8674	0.9355	10	12	0.14	0.357	0	0	0.389	0.902	0	0	1	1	31	30	0.5324	0.6732	5863
chr11_telo_q	11	q	620	28.47	27.33	-1.1	0.96	-0.059	23.2	22	-1.2	0.948	-0.077	0	0	0	NA	NA	0	0	0	NA	NA	51.67	49.33	-2.34	0.955	-0.067	28	26	0.5322	0.7493	24	24	0.466	0.709	0	0	1	1	0	0	1	1	53	49	0.5608	0.6982	3083
chr11_centromere	11	centromere	1740	64.8	64.07	-0.7	0.9887	-0.0163	18.07	17.93	-0.1	0.992	-0.011	0.8	1.07	0.3	1.338	0.42	0.07	0.07	0	1	0	83.74	83.14	-0.6	0.993	-0.01	41	43	0.5609	0.7528	19	19	0.819	0.956	1	1	0.481	0.987	0	0	1	1	63	61	0.5613	0.6982	15380
chr18_p_arm	18	arm	1236	43.47	45.13	1.7	1.0382	0.0541	45.53	45.47	-0.1	0.999	-0.002	0	0	0	NA	NA	0	0	0	NA	NA	89	90.6	1.6	1.018	0.026	42	45	0.296	0.5727	45	43	0.803	0.945	0	0	1	1	0	0	1	1	90	91	0.5749	0.7041	31288
chr7_telo_q	7	q	1585	47	48.67	1.7	1.0355	0.0504	45.6	47.87	2.3	1.05	0.07	0.8	0.67	-0.1	0.838	-0.256	0	0.07	0.07	NA	NA	93.4	97.28	3.88	1.042	0.059	47	49	0.4797	0.7125	45	48	0.533	0.749	1	1	0.836	1	0	0	0.3506	1	95	97	0.5752	0.7041	2801
chr6_pericent_p	6	p	428	11.93	12.53	0.6	1.0503	0.0708	14.6	15.33	0.7	1.05	0.07	0.73	0.4	-0.3	0.548	-0.868	0	0	0	NA	NA	27.26	28.26	1	1.037	0.052	12	13	0.6588	0.8316	14	16	0.505	0.729	1	0	0.074	0.739	0	0	1	1	27	27	0.6021	0.7277	13282
chr3_centromere	3	centromere	9835	309.33	354.8	45.5	1.147	0.1979	54.6	56.87	2.3	1.042	0.059	2.27	1.73	-0.5	0.762	-0.392	0	0	0	NA	NA	366.2	413.4	47.2	1.129	0.175	282	255	0.5338	0.7493	46	51	0.885	0.957	2	2	0.319	0.88	0	0	1	1	337	305	0.604	0.7277	19028
chrY_telo_q	Y	q	87	3.73	3.33	-0.4	0.8928	-0.1637	0.87	0.93	0.1	1.069	0.096	0.73	0.47	-0.3	0.644	-0.635	0	0	0	NA	NA	5.33	4.73	-0.6	0.887	-0.172	4	0	0.55	0.7514	1	0	0.771	0.929	1	0	0.148	0.739	0	0	1	1	6	0	0.6393	0.7641	529
chr8_centromere	8	centromere	3010	125.53	137.47	11.9	1.0951	0.1311	23.07	25.07	2	1.087	0.12	0.47	0.8	0.3	1.702	0.767	0	0	0	NA	NA	149.07	163.34	14.27	1.096	0.132	137	152	0.6631	0.8316	28	27	0.967	0.99	0	1	0.351	0.88	0	0	1	1	165	181	0.6782	0.8043	7082
chr18_pericent_q	18	q	340	9.93	9.2	-0.7	0.9265	-0.1102	12.47	13.93	1.5	1.117	0.16	0	0	0	NA	NA	0	0	0	NA	NA	22.4	23.13	0.73	1.033	0.046	10	9	0.3214	0.5896	12	13	0.327	0.555	0	0	1	1	0	0	1	1	23	23	0.6918	0.8095	8622
chr19_telo_p	19	p	1406	49.8	53.07	3.3	1.0657	0.0918	46.73	45.73	-1	0.979	-0.031	0.07	0	-0.1	NA	NA	0	0	0	NA	NA	96.6	98.8	2.2	1.023	0.032	49	54	0.2515	0.5062	48	43	0.27	0.51	0	0	0.351	0.88	0	0	1	1	94	97	0.6931	0.8095	1674
chrY_telo_p	Y	p	1898	57.8	63.13	5.3	1.0922	0.1273	47	46.8	-0.2	0.996	-0.006	0.13	0.07	-0.1	0.538	-0.893	0	0	0	NA	NA	104.93	110	5.07	1.048	0.068	57	59	0.3391	0.5896	48	44	0.441	0.688	0	0	0.577	0.987	0	0	1	1	107	106	0.7088	0.8216	1017
chr17_telo_p	17	p	2386	73.87	75.2	1.3	1.018	0.0257	59.33	60.07	0.7	1.012	0.018	0.33	0.27	-0.1	0.818	-0.29	0.07	0.07	0	1	0	133.6	135.61	2.01	1.015	0.022	69	72	0.5332	0.7493	58	60	0.934	0.985	0	0	0.494	0.987	0	0	1	1	130	132	0.7232	0.8258	2476
chr3_pericent_q	3	q	300	11.47	11.73	0.3	1.0227	0.0323	11	11.73	0.7	1.066	0.093	0.2	0	-0.2	NA	NA	0	0	0	NA	NA	22.67	23.46	0.79	1.035	0.049	12	11	0.8507	0.9355	11	11	0.628	0.842	0	0	0.079	0.739	0	0	1	1	23	23	0.7232	0.8258	12319
chr5_pericent_p	5	p	296	9.47	9.53	0.1	1.0063	0.0091	16.13	16.13	0	1	0	0	0	0	NA	NA	0	0	0	NA	NA	25.6	25.66	0.06	1.002	0.003	10	10	0.7686	0.9151	16	16	0.967	0.99	0	0	1	1	0	0	1	1	25	26	0.7377	0.8264	10241
chr9_telo_p	9	p	374	13.87	14.8	0.9	1.0671	0.0936	6.8	6.87	0.1	1.01	0.015	0	0	0	NA	NA	0	0	0	NA	NA	20.67	21.67	1	1.048	0.068	14	15	0.4791	0.7125	7	7	0.983	0.99	0	0	1	1	0	0	1	1	21	22	0.7389	0.8264	4314
chr1_centromere	1	centromere	17165	667.33	638.73	-28.6	0.9571	-0.0632	181.4	188.07	6.7	1.037	0.052	6.87	8.33	1.5	1.213	0.278	0	0	0	NA	NA	855.6	835.13	-20.47	0.976	-0.035	657	616	0.5755	0.759	178	173	0.967	0.99	7	7	0.19	0.809	0	0	1	1	850	821	0.74	0.8264	27360
chr4_centromere	4	centromere	5775	164.93	128.73	-36.2	0.7805	-0.3575	70.73	53.07	-17.7	0.75	-0.414	3.13	3.53	0.4	1.128	0.174	0	0	0	NA	NA	238.79	185.33	-53.46	0.776	-0.366	143	82	0.8517	0.9355	61	32	0.493	0.726	3	4	0.581	0.987	0	0	1	1	210	113	0.7557	0.8379	12358
chr20_q_arm	20	arm	4791	191.07	193.07	2	1.0105	0.015	170.2	174.4	4.2	1.025	0.035	0.27	0.2	-0.1	0.741	-0.433	0.07	0.07	0	1	0	361.61	367.74	6.13	1.017	0.024	190	193	0.5469	0.7514	170	172	0.418	0.674	0	0	0.952	1	0	0	1	1	362	363	0.7715	0.848	55820
chr8_pericent_q	8	q	162	7.87	8.27	0.4	1.0508	0.0715	8.2	8.6	0.4	1.049	0.069	0.07	0	-0.1	NA	NA	0	0	0	NA	NA	16.14	16.87	0.73	1.045	0.064	8	9	0.5022	0.7315	8	7	0.983	0.99	0	0	0.351	0.88	0	0	1	1	16	16	0.7864	0.848	11562
chr8_pericent_p	8	p	337	13.33	12.6	-0.7	0.9452	-0.0813	14.67	15.27	0.6	1.041	0.058	0	0	0	NA	NA	0	0	0	NA	NA	28	27.87	-0.13	0.995	-0.007	13	12	0.3363	0.5896	15	15	0.85	0.957	0	0	1	1	0	0	1	1	28	26	0.7867	0.848	9657
chr12_telo_q	12	q	627	25.8	28.67	2.9	1.1112	0.1522	35.27	33.8	-1.5	0.958	-0.061	0	0.07	0.1	NA	NA	0	0	0	NA	NA	61.07	62.54	1.47	1.024	0.034	27	29	0.1234	0.3413	36	35	0.561	0.773	0	0	0.351	0.88	0	0	1	1	62	66	0.7871	0.848	2330
chrX_telo_p	X	p	2023	63.73	64.6	0.9	1.0137	0.0196	41.2	38.73	-2.5	0.94	-0.089	0.13	0.13	0	1	0	0	0	0	NA	NA	105.06	103.46	-1.6	0.985	-0.022	62	63	0.8192	0.9355	42	41	0.429	0.677	0	0	1	1	0	0	1	1	107	106	0.8193	0.8766	828
chr16_pericent_q	16	q	261	12	10.8	-1.2	0.9	-0.152	9.93	10.73	0.8	1.081	0.112	0.07	0	-0.1	NA	NA	0.87	0.6	-0.27	0.69	-0.536	22.87	22.13	-0.74	0.968	-0.047	12	11	0.1601	0.3499	9	11	0.276	0.51	0	0	0.351	0.88	1	1	0.2556	1	22	21	0.8347	0.8869	6780
chr19_telo_q	19	q	218	6.6	6.47	-0.1	0.9803	-0.0287	10.67	10.67	0	1	0	0	0.07	0.1	NA	NA	0	0	0	NA	NA	17.27	17.21	-0.06	0.997	-0.005	6	6	0.9663	0.9794	11	11	1	1	0	0	0.351	0.88	0	0	1	1	16	17	0.8675	0.9154	1905
chrX_centromere	X	centromere	1574	70.47	73.87	3.4	1.0482	0.068	2.8	3.87	1.1	1.382	0.467	0	0.13	0.1	NA	NA	0	0	0	NA	NA	73.27	77.87	4.6	1.063	0.088	68	77	0.9834	0.9899	3	3	0.473	0.709	0	0	0.164	0.739	0	0	1	1	73	81	0.9009	0.9417	8215
chr18_telo_p	18	p	324	9.13	8.93	-0.2	0.9781	-0.032	10.2	10.53	0.3	1.032	0.046	0	0	0	NA	NA	0	0	0	NA	NA	19.33	19.46	0.13	1.007	0.01	9	9	0.8154	0.9355	10	11	0.786	0.939	0	0	1	1	0	0	1	1	20	19	0.9167	0.9417	2595
chr20_telo_p	20	p	280	10.33	9.47	-0.9	0.9167	-0.1254	4	5.07	1.1	1.268	0.342	0	0	0	NA	NA	0	0	0	NA	NA	14.33	14.54	0.21	1.015	0.021	11	10	0.3452	0.5935	3	6	0.109	0.298	0	0	1	1	0	0	1	1	15	13	0.9167	0.9417	2637
chr4_telo_q	4	q	1396	28.8	28.13	-0.7	0.9767	-0.034	36.4	36.67	0.3	1.007	0.011	0.6	0.33	-0.3	0.55	-0.862	0	0	0	NA	NA	65.8	65.13	-0.67	0.99	-0.015	29	29	0.9502	0.9758	37	37	0.755	0.929	0	0	0.274	0.88	0	0	1	1	65	61	0.9171	0.9417	3605
chr2_telo_q	2	q	1157	30.73	30	-0.7	0.9762	-0.0347	31.27	31.87	0.6	1.019	0.027	0.13	0.07	-0.1	0.538	-0.893	0	0	0	NA	NA	62.13	61.94	-0.19	0.997	-0.004	30	31	0.5455	0.7514	32	30	0.901	0.957	0	0	0.577	0.987	0	0	1	1	63	61	0.9338	0.9463	2321
chr13_centromere	13	centromere	17937	572	449.4	-122.6	0.7857	-0.348	145	144.67	-0.3	0.998	-0.003	4.53	3.27	-1.3	0.722	-0.47	0	0	0	NA	NA	721.53	597.34	-124.19	0.828	-0.273	342	379	0.8682	0.9355	135	147	0.868	0.957	3	3	0.216	0.837	0	0	1	1	489	519	0.9339	0.9463	35515
chr5_centromere	5	centromere	5373	202	172.8	-29.2	0.8554	-0.2253	68.47	74	5.5	1.081	0.112	8.93	12.33	3.4	1.381	0.465	0	0	0	NA	NA	279.4	259.13	-20.27	0.927	-0.109	127	159	0.9174	0.9747	65	75	0.561	0.773	9	12	0.074	0.739	0	0	1	1	210	246	0.9835	0.9899	12532
chrX_telo_q	X	q	69	1.33	1	-0.3	0.7519	-0.4114	2.13	2.33	0.2	1.094	0.129	0	0	0	NA	NA	0	0	0	NA	NA	3.46	3.33	-0.13	0.962	-0.055	0	1	0.8759	0.9372	1	2	0.896	0.957	0	0	1	1	0	0	1	1	1	2	1	1	705
[truncated: 2 more columns]

## Sheet: clustering_coordinates
sample	role	population	snv_pc1	snv_pc2	snv_pc3	sv_pc1	sv_pc2	sv_pc3
EUF7P	Proband	EUR	0.261993	-0.265054	-0.0627967	0.0713997	-0.0379906	0.0173609
EUF7M	Mother	EUR	0.256884	-0.170117	-0.0149927	0.0441914	-0.0383666	0.0416221
EUF7F	Father	EUR	0.206482	-0.109993	0.0795456	0.0593628	-0.0204786	0.0155015
AFR1P	Proband	AFR	-0.65614	-0.273884	-0.0396054	-0.17562	0.042192	0.0590671
AFR1M	Mother	AFR	-0.704551	-0.197931	0.0110569	-0.134844	0.0565573	0.0674591
AFR1F	Father	AFR	-0.496826	-0.291966	-0.0788103	-0.155608	0.00250868	0.0265322
EUF13P	Proband	EUR	0.217185	-0.0615224	0.112545	0.0537181	-0.122955	0.0378159
EUF13M	Mother	EUR	0.162654	0.137685	0.0594802	0.0545913	-0.0512152	-0.00553825
EUF13F	Father	EUR	0.174334	-0.179666	0.0464569	0.0426514	-0.120604	0.0347954
EUF6P	Proband	EUR	0.239008	-0.0152934	-0.24968	0.000907553	-0.00557261	-0.0272962
EUF6M	Mother	EUR	0.295416	-0.0614533	-0.157286	-0.00593128	-0.0265568	-0.0371164
EUF6F	Father	EUR	0.215578	0.0748218	-0.195756	0.0631157	0.052434	0.0363461
EUF11P	Proband	EUR	0.171199	-0.230423	-0.0710262	0.043297	-0.133423	0.0415096
EUF11M	Mother	EUR	0.0764444	-0.0763856	-0.0136319	0.025424	-0.0716842	0.0223206
EUF11F	Father	EUR	0.0959111	-0.170751	-0.0463595	0.0821561	0.0058761	0.0513173
EUF12P	Proband	EUR	0.0729449	0.0197157	0.214865	0.00361062	-0.0310246	0.0211867
EUF12M	Mother	EUR	-0.012673	-0.0309427	0.208141	0.0329348	0.0691619	0.0521606
EUF12F	Father	EUR	0.165372	-0.0659769	0.162212	-0.00571325	-0.0768794	-0.00825413
EUF8P	Proband	EUR	0.111594	-0.0408268	-0.113947	0.1055	0.0229676	-0.0239087
EUF8M	Mother	EUR	0.0654296	-0.0317886	-0.0721784	0.0511731	-0.0300318	-0.0535743
EUF8F	Father	EUR	0.206357	-0.0127055	-0.224741	0.0809144	-0.00041782	0.0206807
EUF4P	Proband	EUR	0.143518	-0.188795	0.489385	0.0719596	-0.0210797	-0.0889456
EUF4M	Mother	EUR	0.0934189	-0.0446195	0.445498	0.0389229	-0.0464888	-0.0878384
EUF4F	Father	EUR	0.109499	-0.180725	0.361487	0.0670376	0.039266	-0.0216316
EUF3P	Proband	EUR	0.182573	-0.140599	-0.233967	0.0249965	0.00954243	-0.127585
EUF3M	Mother	EUR	0.131993	-0.0203728	-0.0963817	0.0177403	-0.0151978	-0.0900059
EUF3F	Father	EUR	0.238582	-0.131795	-0.381396	0.0528313	0.0556422	-0.0501196
EUF1P	Proband	EUR	0.0383379	-0.237196	-0.027875	0.0910308	0.0416036	0.00366323
EUF1M	Mother	EUR	0.0573704	-0.15819	0.0968538	0.0537238	0.00390963	-0.0524235
EUF1F	Father	EUR	0.0443275	-0.169915	-0.0415215	0.0421081	-0.03046	0.0229436
PRF1P	Proband	PUR	-0.123118	-0.224746	-0.100062	-0.0653473	-0.00501982	0.0347806
PRF1M	Mother	PUR	0.034229	-0.214303	-0.0122743	-0.046958	-0.0184476	0.0211814
PRF1F	Father	PUR	-0.109738	-0.138298	-0.186091	-0.0496588	0.0133389	0.0333317
PRF2P	Proband	PUR	-0.00989032	0.0582197	0.0681365	-0.0431808	-0.00221748	-0.0728174
PRF2M	Mother	PUR	-0.0670345	0.0378449	0.0626547	-0.0445798	-0.00990848	-0.0342236
PRF2F	Father	PUR	0.00468513	0.0479481	-0.0292584	0.0207539	0.0581898	-0.0414073
PRF3P	Proband	PUR	-0.376414	-0.163909	-0.000703046	-0.107382	0.0167275	0.0145026
PRF3M	Mother	PUR	-0.247445	0.0335803	0.081167	-0.0515347	0.0894134	0.0278494
PRF3F	Father	PUR	-0.392016	-0.266262	-0.0970915	-0.104267	0.00714085	-0.0136539
PRF4P	Proband	PUR	-0.263899	0.43371	-0.0407166	-0.0303139	7.11404e-05	-0.0480866
PRF4M	Mother	PUR	-0.0862737	0.178204	-0.0110226	-0.00039298	-0.103383	-0.0397556
PRF4F	Father	PUR	-0.378326	0.598137	0.0205289	-0.0475391	0.103284	0.00866007
PRF5P	Proband	PUR	-0.0702563	0.0882987	-0.140133	0.0123687	0.111991	0.0379292
PRF5M	Mother	PUR	-0.0257384	0.0215677	-0.116154	-0.0353976	0.0205982	0.0300703
PRF5F	Father	PUR	-0.0733063	0.0690406	-0.102183	0.0226003	0.110382	0.0241461
PRF6P	Proband	PUR	-0.0437999	0.144707	-0.0348009	0.0283082	0.102647	0.0148874
PRF6M	Mother	PUR	0.0350422	0.140815	-0.00251506	0.0121325	0.115363	-0.00435478
PRF6F	Father	PUR	-0.0497535	0.00735509	0.0414577	-0.00399926	0.00384113	0.0016022
EUF15P	Proband	EUR	-0.0355765	0.172681	0.0266308	-0.0612985	-0.0313815	0.132724
EUF15M	Mother	EUR	0.0289608	0.131745	-0.0381731	-0.047357	-0.0171709	0.099325
EUF15F	Father	EUR	-0.0712365	0.204444	0.138035	-0.0359774	-0.0221476	0.0694396
EUF2P	Proband	EUR	0.140759	0.160277	0.0501509	0.084212	0.0503261	0.0332456
EUF2M	Mother	EUR	0.0960873	0.246854	-0.0157162	0.0279293	-0.00920284	-0.00926334
EUF2F	Father	EUR	0.150589	0.0362743	0.027361	0.0931546	0.0650229	0.0349866
PRF7P	Proband	PUR	-0.189074	-0.0636926	-0.173927	-0.0262398	-0.0420212	-0.0649021
PRF7M	Mother	PUR	-0.224023	-0.0997869	-0.197113	-0.0633369	-0.0267627	-0.0878761
PRF7F	Father	PUR	-0.158633	-0.00873246	-0.0125716	0.00536798	-0.028495	-0.0102054
PRF8P	Proband	PUR	-0.148257	-0.188705	0.180563	-0.0733667	0.0171254	0.0342461
PRF8M	Mother	PUR	-0.200467	-0.119538	0.166282	-0.0759908	0.0227972	0.0596741
PRF8F	Father	PUR	-0.0859929	-0.21879	0.17552	0.00462413	0.054913	-0.00851225
PRF9P	Proband	PUR	0.0176207	0.0714978	-0.0634092	-0.0415387	-0.0407613	-0.00779475
PRF9M	Mother	PUR	0.0189246	0.0889733	-0.0441544	-0.0402851	0.0104881	-0.0485899
PRF9F	Father	PUR	-0.021169	-0.00733234	0.0615241	-0.0598264	-0.106938	0.0189202
PRF10P	Proband	PUR	0.233586	0.0544197	0.0749247	0.045049	0.0100808	0.0910709
PRF10M	Mother	PUR	0.130395	0.120933	0.176925	0.0647556	0.0230689	0.051676
PRF10F	Father	PUR	0.133223	0.0998363	-0.0556945	-0.0123325	-0.021947	0.0409716
PRF11P	Proband	PUR	-0.21786	0.125203	-0.0363512	-0.0995485	-0.0115572	-0.0943741
PRF11M	Mother	PUR	-0.235966	0.138049	0.0657616	-0.0742463	0.000825358	-0.0107232
PRF11F	Father	PUR	-0.161576	0.0307251	-0.0177113	-0.0539511	-0.0425009	-0.0834202
PRF12P	Proband	PUR	-0.0314323	-0.108301	-0.0117689	0.013981	0.0753201	-0.0409468
PRF12M	Mother	PUR	0.00187013	-0.0725297	-0.0336959	-0.00761819	0.0840333	-0.0434193
PRF12F	Father	PUR	-0.0134505	-0.105263	-0.0287517	-0.0102178	0.006914	-0.0325025
PRF13P	Proband	PUR	0.0798795	0.223886	0.0197659	-0.00205965	-0.0234254	0.0461428
PRF13M	Mother	PUR	0.0145934	0.108201	-0.0526589	-0.0386027	-0.0752875	0.0284856
PRF13F	Father	PUR	0.0376242	0.236243	-0.0545399	0.0471513	0.0500192	0.0369796
PRF14P	Proband	PUR	0.0302116	-0.0119156	-0.277369	-0.0642741	0.0366008	-0.0476526
PRF14M	Mother	PUR	0.0229106	-0.0925824	-0.213517	-0.0366881	0.0954508	-0.0275711
PRF14F	Father	PUR	-0.0444177	0.0160891	-0.114299	-0.0498484	0.00824764	-0.0545078
EUF14P	Proband	EUR	0.114133	0.0438008	0.0267975	0.0268628	-0.0949085	0.0189524
EUF14M	Mother	EUR	0.1023	0.0385103	0.0986843	0.0122401	-0.10946	0.0121183
EUF14F	Father	EUR	0.169742	-0.0777478	-0.127338	0.075804	0.027336	0.022214
PRF15P	Proband	PUR	-0.0401299	0.260467	0.00739619	-0.0401645	-0.0647386	0.0467809
PRF15M	Mother	PUR	-0.0374147	0.162032	-0.052429	-0.0329341	-0.0206642	0.0795761
PRF15F	Father	PUR	-0.105583	0.156015	-0.0657574	-0.0392234	-0.052233	-0.0157092
EUF9P	Proband	EUR	0.167889	-0.0366108	-0.0137182	0.0506987	-0.0188395	0.00930121
EUF9M	Mother	EUR	0.227631	0.0749163	0.0283643	0.0723732	0.057561	0.0674947
EUF9F	Father	EUR	0.200481	-0.0320063	-0.0671892	0.0186345	-0.0435027	-0.0715149
EUF10P	Proband	EUR	-0.0272014	0.0515258	0.44905	0.0970915	0.0152578	0.0180311
EUF10M	Mother	EUR	0.0529783	0.0519664	0.157561	0.0426073	-0.0879324	0.02322
EUF10F	Father	EUR	0.0363317	-0.0524066	0.382646	0.0682393	0.0370753	0.00155619
EUF5P	Proband	EUR	-0.0903034	0.27825	0.00380051	-0.0211846	0.0305182	-0.0858818
EUF5M	Mother	EUR	-0.00144102	0.137271	-0.0139959	0.0235046	0.0713862	-0.0191998
EUF5F	Father	EUR	0.0113229	0.249612	-0.102408	-0.0293652	0.00626278	-0.105251

## Sheet: clustering_relatedness
snv_sample_a	snv_sample_b	snv_relatedness	sv_sample_a	sv_sample_b	sv_relatedness
EUR7P	EUR7M	0.36	EUR7P	EUR7M	0.768322
EUR7P	EUR7F	0.442	EUR7P	EUR7F	0.761627
EUR7P	AFR1P	-0.304	EUR7P	AFR1P	0.559766
EUR7P	AFR1M	-0.417	EUR7P	AFR1M	0.56574
EUR7P	AFR1F	-0.243	EUR7P	AFR1F	0.570244
EUR7P	EUR13P	-0.099	EUR7P	EUR13P	0.584276
EUR7P	EUR13M	-0.169	EUR7P	EUR13M	0.606532
EUR7P	EUR13F	-0.16	EUR7P	EUR13F	0.598522
EUR7P	EUR6P	-0.094	EUR7P	EUR6P	0.600773
EUR7P	EUR6M	-0.121	EUR7P	EUR6M	0.595732
EUR7P	EUR6F	-0.14	EUR7P	EUR6F	0.61339
EUR7P	EUR11P	-0.171	EUR7P	EUR11P	0.594412
EUR7P	EUR11M	-0.068	EUR7P	EUR11M	0.60723
EUR7P	EUR11F	-0.216	EUR7P	EUR11F	0.599824
EUR7P	EUR12P	-0.234	EUR7P	EUR12P	0.585703
EUR7P	EUR12M	-0.141	EUR7P	EUR12M	0.604692
EUR7P	EUR12F	-0.107	EUR7P	EUR12F	0.597155
EUR7P	EUR8P	-0.081	EUR7P	EUR8P	0.587402
EUR7P	EUR8M	-0.145	EUR7P	EUR8M	0.592763
EUR7P	EUR8F	-0.149	EUR7P	EUR8F	0.59123
EUR7P	EUR4P	-0.142	EUR7P	EUR4P	0.595888
EUR7P	EUR4M	-0.223	EUR7P	EUR4M	0.599306
EUR7P	EUR4F	-0.138	EUR7P	EUR4F	0.593909
EUR7P	EUR3P	-0.149	EUR7P	EUR3P	0.596425
EUR7P	EUR3M	-0.186	EUR7P	EUR3M	0.6005
EUR7P	EUR3F	-0.215	EUR7P	EUR3F	0.59338
EUR7P	EUR1P	-0.168	EUR7P	EUR1P	0.609739
EUR7P	EUR1M	-0.212	EUR7P	EUR1M	0.587563
EUR7P	EUR1F	-0.15	EUR7P	EUR1F	0.60294
EUR7P	PUR1P	-0.164	EUR7P	PUR1P	0.581077
EUR7P	PUR1M	-0.005	EUR7P	PUR1M	0.587732
EUR7P	PUR1F	-0.066	EUR7P	PUR1F	0.58435
EUR7P	PUR2P	-0.106	EUR7P	PUR2P	0.591614
EUR7P	PUR2M	-0.124	EUR7P	PUR2M	0.583678
EUR7P	PUR2F	-0.131	EUR7P	PUR2F	0.606063
EUR7P	PUR3P	-0.191	EUR7P	PUR3P	0.572145
EUR7P	PUR3M	-0.094	EUR7P	PUR3M	0.572814
EUR7P	PUR3F	-0.28	EUR7P	PUR3F	0.576418
EUR7P	PUR4P	-0.221	EUR7P	PUR4P	0.594987
EUR7P	PUR4M	-0.187	EUR7P	PUR4M	0.600352
EUR7P	PUR4F	-0.433	EUR7P	PUR4F	0.570618
EUR7P	PUR5P	-0.268	EUR7P	PUR5P	0.593471
EUR7P	PUR5M	-0.123	EUR7P	PUR5M	0.580242
EUR7P	PUR5F	-0.116	EUR7P	PUR5F	0.59267
EUR7P	PUR6P	-0.196	EUR7P	PUR6P	0.600022
EUR7P	PUR6M	-0.122	EUR7P	PUR6M	0.597623
EUR7P	PUR6F	-0.169	EUR7P	PUR6F	0.600084
EUR7P	EUR15P	-0.181	EUR7P	EUR15P	0.591083
EUR7P	EUR15M	-0.086	EUR7P	EUR15M	0.581946
EUR7P	EUR15F	-0.256	EUR7P	EUR15F	0.590677
EUR7P	EUR2P	-0.12	EUR7P	EUR2P	0.595373
EUR7P	EUR2M	-0.2	EUR7P	EUR2M	0.594683
EUR7P	EUR2F	-0.12	EUR7P	EUR2F	0.60138
EUR7P	PUR7P	-0.12	EUR7P	PUR7P	0.599924
EUR7P	PUR7M	-0.173	EUR7P	PUR7M	0.57423
EUR7P	PUR7F	-0.112	EUR7P	PUR7F	0.599329
EUR7P	PUR8P	-0.163	EUR7P	PUR8P	0.584892
EUR7P	PUR8M	-0.12	EUR7P	PUR8M	0.578031
EUR7P	PUR8F	-0.091	EUR7P	PUR8F	0.604829
EUR7P	PUR9P	-0.116	EUR7P	PUR9P	0.577545
EUR7P	PUR9M	-0.079	EUR7P	PUR9M	0.584973
EUR7P	PUR9F	-0.087	EUR7P	PUR9F	0.568064
EUR7P	PUR10P	-0.153	EUR7P	PUR10P	0.613577
EUR7P	PUR10M	-0.232	EUR7P	PUR10M	0.613656
EUR7P	PUR10F	-0.197	EUR7P	PUR10F	0.600948
EUR7P	PUR11P	-0.237	EUR7P	PUR11P	0.577062
EUR7P	PUR11M	-0.212	EUR7P	PUR11M	0.580862
EUR7P	PUR11F	-0.072	EUR7P	PUR11F	0.591079
EUR7P	PUR12P	-0.125	EUR7P	PUR12P	0.607066
EUR7P	PUR12M	-0.185	EUR7P	PUR12M	0.607849
EUR7P	PUR12F	-0.171	EUR7P	PUR12F	0.611748
EUR7P	PUR13P	-0.191	EUR7P	PUR13P	0.600929
EUR7P	PUR13M	-0.185	EUR7P	PUR13M	0.582748
EUR7P	PUR13F	-0.221	EUR7P	PUR13F	0.601432
EUR7P	PUR14P	-0.091	EUR7P	PUR14P	0.588075
EUR7P	PUR14M	-0.126	EUR7P	PUR14M	0.596405
EUR7P	PUR14F	-0.054	EUR7P	PUR14F	0.601899
EUR7P	EUR14P	-0.061	EUR7P	EUR14P	0.590796
EUR7P	EUR14M	-0.151	EUR7P	EUR14M	0.599816
EUR7P	EUR14F	-0.047	EUR7P	EUR14F	0.600099
EUR7P	PUR15P	-0.213	EUR7P	PUR15P	0.598107
EUR7P	PUR15M	-0.094	EUR7P	PUR15M	0.584681
EUR7P	PUR15F	-0.203	EUR7P	PUR15F	0.597718
EUR7P	EUR9P	-0.16	EUR7P	EUR9P	0.612547
EUR7P	EUR9M	-0.123	EUR7P	EUR9M	0.596779
EUR7P	EUR9F	-0.168	EUR7P	EUR9F	0.599229
EUR7P	EUR10P	-0.21	EUR7P	EUR10P	0.603918
EUR7P	EUR10M	-0.005	EUR7P	EUR10M	0.59051
EUR7P	EUR10F	-0.28	EUR7P	EUR10F	0.598425
EUR7P	EUR5P	-0.259	EUR7P	EUR5P	0.599237
EUR7P	EUR5M	-0.091	EUR7P	EUR5M	0.600509
EUR7P	EUR5F	-0.193	EUR7P	EUR5F	0.586799
EUR7M	EUR7F	-0.098	EUR7M	EUR7F	0.549032
EUR7M	AFR1P	-0.294	EUR7M	AFR1P	0.572502
EUR7M	AFR1M	-0.403	EUR7M	AFR1M	0.562937
EUR7M	AFR1F	-0.253	EUR7M	AFR1F	0.575191
EUR7M	EUR13P	-0.072	EUR7M	EUR13P	0.589355
EUR7M	EUR13M	-0.055	EUR7M	EUR13M	0.594541
EUR7M	EUR13F	-0.095	EUR7M	EUR13F	0.586255
EUR7M	EUR6P	-0.107	EUR7M	EUR6P	0.57778
EUR7M	EUR6M	-0.146	EUR7M	EUR6M	0.596426
EUR7M	EUR6F	-0.101	EUR7M	EUR6F	0.589038
EUR7M	EUR11P	-0.16	EUR7M	EUR11P	0.597189
EUR7M	EUR11M	-0.035	EUR7M	EUR11M	0.606075
EUR7M	EUR11F	-0.094	EUR7M	EUR11F	0.591317
EUR7M	EUR12P	-0.271	EUR7M	EUR12P	0.592012
EUR7M	EUR12M	-0.21	EUR7M	EUR12M	0.612691
EUR7M	EUR12F	-0.086	EUR7M	EUR12F	0.588865
EUR7M	EUR8P	-0.083	EUR7M	EUR8P	0.569422
EUR7M	EUR8M	-0.113	EUR7M	EUR8M	0.570471
EUR7M	EUR8F	-0.204	EUR7M	EUR8F	0.593176
EUR7M	EUR4P	-0.116	EUR7M	EUR4P	0.584567
EUR7M	EUR4M	-0.163	EUR7M	EUR4M	0.576056
EUR7M	EUR4F	-0.066	EUR7M	EUR4F	0.58977
EUR7M	EUR3P	-0.089	EUR7M	EUR3P	0.581452
EUR7M	EUR3M	-0.184	EUR7M	EUR3M	0.585998
EUR7M	EUR3F	-0.19	EUR7M	EUR3F	0.594147
EUR7M	EUR1P	-0.203	EUR7M	EUR1P	0.604501
EUR7M	EUR1M	-0.146	EUR7M	EUR1M	0.573144
EUR7M	EUR1F	-0.15	EUR7M	EUR1F	0.591107
EUR7M	PUR1P	-0.158	EUR7M	PUR1P	0.568201
EUR7M	PUR1M	-0.126	EUR7M	PUR1M	0.573825
EUR7M	PUR1F	-0.056	EUR7M	PUR1F	0.572232
EUR7M	PUR2P	-0.063	EUR7M	PUR2P	0.585923
EUR7M	PUR2M	-0.161	EUR7M	PUR2M	0.581117
EUR7M	PUR2F	-0.011	EUR7M	PUR2F	0.599336
EUR7M	PUR3P	-0.186	EUR7M	PUR3P	0.577051
EUR7M	PUR3M	-0.163	EUR7M	PUR3M	0.587594
EUR7M	PUR3F	-0.303	EUR7M	PUR3F	0.573075
EUR7M	PUR4P	-0.174	EUR7M	PUR4P	0.573879
EUR7M	PUR4M	-0.162	EUR7M	PUR4M	0.577424
EUR7M	PUR4F	-0.351	EUR7M	PUR4F	0.574018
EUR7M	PUR5P	-0.204	EUR7M	PUR5P	0.584882
EUR7M	PUR5M	-0.077	EUR7M	PUR5M	0.581993
EUR7M	PUR5F	-0.182	EUR7M	PUR5F	0.58207
EUR7M	PUR6P	-0.238	EUR7M	PUR6P	0.580157
EUR7M	PUR6M	-0.147	EUR7M	PUR6M	0.573287
EUR7M	PUR6F	-0.139	EUR7M	PUR6F	0.590309
EUR7M	EUR15P	-0.174	EUR7M	EUR15P	0.581106
EUR7M	EUR15M	0.051	EUR7M	EUR15M	0.576736
EUR7M	EUR15F	-0.207	EUR7M	EUR15F	0.58733
EUR7M	EUR2P	-0.179	EUR7M	EUR2P	0.615465
EUR7M	EUR2M	-0.279	EUR7M	EUR2M	0.597321
EUR7M	EUR2F	-0.191	EUR7M	EUR2F	0.595433
EUR7M	PUR7P	-0.228	EUR7M	PUR7P	0.586153
EUR7M	PUR7M	-0.281	EUR7M	PUR7M	0.573107
EUR7M	PUR7F	-0.138	EUR7M	PUR7F	0.582791
EUR7M	PUR8P	-0.084	EUR7M	PUR8P	0.578919
EUR7M	PUR8M	-0.046	EUR7M	PUR8M	0.572579
EUR7M	PUR8F	-0.094	EUR7M	PUR8F	0.581124
EUR7M	PUR9P	-0.053	EUR7M	PUR9P	0.578841
EUR7M	PUR9M	-0.064	EUR7M	PUR9M	0.573809
EUR7M	PUR9F	-0.112	EUR7M	PUR9F	0.577021
EUR7M	PUR10P	-0.083	EUR7M	PUR10P	0.612165
EUR7M	PUR10M	-0.172	EUR7M	PUR10M	0.591889
EUR7M	PUR10F	-0.15	EUR7M	PUR10F	0.604054
EUR7M	PUR11P	-0.147	EUR7M	PUR11P	0.573929
EUR7M	PUR11M	-0.183	EUR7M	PUR11M	0.578413
EUR7M	PUR11F	-0.022	EUR7M	PUR11F	0.580316
EUR7M	PUR12P	-0.111	EUR7M	PUR12P	0.592716
EUR7M	PUR12M	-0.212	EUR7M	PUR12M	0.584845
EUR7M	PUR12F	-0.229	EUR7M	PUR12F	0.580518
EUR7M	PUR13P	-0.111	EUR7M	PUR13P	0.591508
EUR7M	PUR13M	-0.209	EUR7M	PUR13M	0.57778
EUR7M	PUR13F	-0.141	EUR7M	PUR13F	0.589864
EUR7M	PUR14P	-0.023	EUR7M	PUR14P	0.569674
EUR7M	PUR14M	-0.005	EUR7M	PUR14M	0.583492
EUR7M	PUR14F	-0.022	EUR7M	PUR14F	0.571919
EUR7M	EUR14P	-0.083	EUR7M	EUR14P	0.601093
EUR7M	EUR14M	-0.08	EUR7M	EUR14M	0.589655
EUR7M	EUR14F	-0.042	EUR7M	EUR14F	0.600674
EUR7M	PUR15P	-0.244	EUR7M	PUR15P	0.579839
EUR7M	PUR15M	-0.141	EUR7M	PUR15M	0.583309
EUR7M	PUR15F	-0.041	EUR7M	PUR15F	0.566674
EUR7M	EUR9P	-0.053	EUR7M	EUR9P	0.592632
EUR7M	EUR9M	-0.09	EUR7M	EUR9M	0.590037
EUR7M	EUR9F	-0.114	EUR7M	EUR9F	0.580814
EUR7M	EUR10P	-0.187	EUR7M	EUR10P	0.582638
EUR7M	EUR10M	0.022	EUR7M	EUR10M	0.592316
EUR7M	EUR10F	-0.15	EUR7M	EUR10F	0.587378
EUR7M	EUR5P	-0.205	EUR7M	EUR5P	0.595418
EUR7M	EUR5M	0	EUR7M	EUR5M	0.590471
EUR7M	EUR5F	-0.159	EUR7M	EUR5F	0.591345
EUR7F	AFR1P	-0.221	EUR7F	AFR1P	0.564496
EUR7F	AFR1M	-0.361	EUR7F	AFR1M	0.575261
EUR7F	AFR1F	-0.195	EUR7F	AFR1F	0.568332
EUR7F	EUR13P	-0.017	EUR7F	EUR13P	0.590698
EUR7F	EUR13M	-0.079	EUR7F	EUR13M	0.60136
EUR7F	EUR13F	-0.017	EUR7F	EUR13F	0.587235
EUR7F	EUR6P	-0.016	EUR7F	EUR6P	0.602139
EUR7F	EUR6M	-0.056	EUR7F	EUR6M	0.597897
EUR7F	EUR6F	-0.079	EUR7F	EUR6F	0.627084
EUR7F	EUR11P	-0.051	EUR7F	EUR11P	0.596048
EUR7F	EUR11M	0.028	EUR7F	EUR11M	0.594883
EUR7F	EUR11F	-0.04	EUR7F	EUR11F	0.608648
EUR7F	EUR12P	-0.092	EUR7F	EUR12P	0.58872
EUR7F	EUR12M	-0.037	EUR7F	EUR12M	0.6012
EUR7F	EUR12F	-0.017	EUR7F	EUR12F	0.594016
EUR7F	EUR8P	-0.011	EUR7F	EUR8P	0.610163
EUR7F	EUR8M	-0.041	EUR7F	EUR8M	0.599085
EUR7F	EUR8F	0	EUR7F	EUR8F	0.59469
EUR7F	EUR4P	-0.029	EUR7F	EUR4P	0.594139
EUR7F	EUR4M	-0.117	EUR7F	EUR4M	0.60364
EUR7F	EUR4F	0	EUR7F	EUR4F	0.606863
EUR7F	EUR3P	-0.078	EUR7F	EUR3P	0.592139
EUR7F	EUR3M	-0.108	EUR7F	EUR3M	0.603188
EUR7F	EUR3F	-0.191	EUR7F	EUR3F	0.589199
EUR7F	EUR1P	-0.091	EUR7F	EUR1P	0.602387
EUR7F	EUR1M	-0.156	EUR7F	EUR1M	0.592404
EUR7F	EUR1F	-0.12	EUR7F	EUR1F	0.603403
EUR7F	PUR1P	-0.13	EUR7F	PUR1P	0.573976
EUR7F	PUR1M	0.01	EUR7F	PUR1M	0.593821
EUR7F	PUR1F	-0.015	EUR7F	PUR1F	0.579319
EUR7F	PUR2P	-0.016	EUR7F	PUR2P	0.596619
EUR7F	PUR2M	-0.042	EUR7F	PUR2M	0.593733
EUR7F	PUR2F	-0.043	EUR7F	PUR2F	0.600164
EUR7F	PUR3P	-0.115	EUR7F	PUR3P	0.582346
EUR7F	PUR3M	-0.079	EUR7F	PUR3M	0.586012
EUR7F	PUR3F	-0.19	EUR7F	PUR3F	0.582205
EUR7F	PUR4P	-0.124	EUR7F	PUR4P	0.600437
EUR7F	PUR4M	-0.106	EUR7F	PUR4M	0.602815
EUR7F	PUR4F	-0.29	EUR7F	PUR4F	0.580191
EUR7F	PUR5P	-0.1	EUR7F	PUR5P	0.593467
EUR7F	PUR5M	-0.005	EUR7F	PUR5M	0.582509
EUR7F	PUR5F	-0.16	EUR7F	PUR5F	0.592535
EUR7F	PUR6P	-0.054	EUR7F	PUR6P	0.605431
EUR7F	PUR6M	0.022	EUR7F	PUR6M	0.594882
EUR7F	PUR6F	-0.08	EUR7F	PUR6F	0.600291
EUR7F	EUR15P	-0.139	EUR7F	EUR15P	0.582555
EUR7F	EUR15M	-0.085	EUR7F	EUR15M	0.584795
EUR7F	EUR15F	-0.121	EUR7F	EUR15F	0.578903
EUR7F	EUR2P	-0.09	EUR7F	EUR2P	0.592516
EUR7F	EUR2M	-0.033	EUR7F	EUR2M	0.589328
EUR7F	EUR2F	0	EUR7F	EUR2F	0.602033
EUR7F	PUR7P	-0.115	EUR7F	PUR7P	0.587348
EUR7F	PUR7M	-0.097	EUR7F	PUR7M	0.57128
EUR7F	PUR7F	-0.098	EUR7F	PUR7F	0.599356
EUR7F	PUR8P	-0.087	EUR7F	PUR8P	0.596395
EUR7F	PUR8M	-0.071	EUR7F	PUR8M	0.59429
EUR7F	PUR8F	-0.069	EUR7F	PUR8F	0.606645
EUR7F	PUR9P	-0.021	EUR7F	PUR9P	0.58098
EUR7F	PUR9M	-0.077	EUR7F	PUR9M	0.584938
EUR7F	PUR9F	0.016	EUR7F	PUR9F	0.574727
EUR7F	PUR10P	-0.091	EUR7F	PUR10P	0.606857
EUR7F	PUR10M	-0.126	EUR7F	PUR10M	0.598436
EUR7F	PUR10F	-0.123	EUR7F	PUR10F	0.592561
EUR7F	PUR11P	-0.138	EUR7F	PUR11P	0.572504
EUR7F	PUR11M	-0.106	EUR7F	PUR11M	0.573944
EUR7F	PUR11F	-0.025	EUR7F	PUR11F	0.578709
EUR7F	PUR12P	-0.068	EUR7F	PUR12P	0.594517
EUR7F	PUR12M	-0.103	EUR7F	PUR12M	0.605405
EUR7F	PUR12F	-0.11	EUR7F	PUR12F	0.600674
EUR7F	PUR13P	-0.103	EUR7F	PUR13P	0.608981
EUR7F	PUR13M	-0.202	EUR7F	PUR13M	0.592811
EUR7F	PUR13F	-0.105	EUR7F	PUR13F	0.604976
EUR7F	PUR14P	-0.113	EUR7F	PUR14P	0.591464
EUR7F	PUR14M	-0.088	EUR7F	PUR14M	0.586943
EUR7F	PUR14F	-0.052	EUR7F	PUR14F	0.584655
EUR7F	EUR14P	-0.011	EUR7F	EUR14P	0.593994
EUR7F	EUR14M	-0.101	EUR7F	EUR14M	0.585935
EUR7F	EUR14F	-0.034	EUR7F	EUR14F	0.598674
EUR7F	PUR15P	-0.077	EUR7F	PUR15P	0.596507
EUR7F	PUR15M	0.02	EUR7F	PUR15M	0.596425
EUR7F	PUR15F	-0.062	EUR7F	PUR15F	0.599846
EUR7F	EUR9P	-0.054	EUR7F	EUR9P	0.619382
EUR7F	EUR9M	-0.016	EUR7F	EUR9M	0.614334
EUR7F	EUR9F	-0.029	EUR7F	EUR9F	0.601247
EUR7F	EUR10P	-0.058	EUR7F	EUR10P	0.600658
EUR7F	EUR10M	0.089	EUR7F	EUR10M	0.593397
EUR7F	EUR10F	-0.035	EUR7F	EUR10F	0.599569
EUR7F	EUR5P	-0.168	EUR7F	EUR5P	0.587401
EUR7F	EUR5M	-0.015	EUR7F	EUR5M	0.600377
EUR7F	EUR5F	-0.054	EUR7F	EUR5F	0.581222
AFR1P	AFR1M	0.454	AFR1P	AFR1M	0.795142
AFR1P	AFR1F	0.485	AFR1P	AFR1F	0.79356
AFR1P	EUR13P	-0.205	AFR1M	AFR1F	0.61507
AFR1P	EUR13M	-0.216	EUR13P	AFR1P	0.57281
AFR1P	EUR13F	-0.224	EUR13P	AFR1M	0.580822
AFR1P	EUR6P	-0.194	EUR13P	AFR1F	0.558752
AFR1P	EUR6M	-0.322	EUR13P	EUR13M	0.759504
AFR1P	EUR6F	-0.3	EUR13P	EUR13F	0.776706
AFR1P	EUR11P	-0.231	EUR13P	EUR6P	0.587999
AFR1P	EUR11M	-0.115	EUR13P	EUR6M	0.587155
AFR1P	EUR11F	-0.225	EUR13P	EUR6F	0.590586
AFR1P	EUR12P	-0.243	EUR13P	EUR11P	0.608527
AFR1P	EUR12M	-0.115	EUR13P	EUR11M	0.597347
AFR1P	EUR12F	-0.179	EUR13P	EUR11F	0.599148
AFR1P	EUR8P	-0.141	EUR13P	EUR12P	0.583212
AFR1P	EUR8M	-0.154	EUR13P	EUR12M	0.56974
AFR1P	EUR8F	-0.189	EUR13P	EUR12F	0.591543
AFR1P	EUR4P	-0.199	EUR13P	EUR8P	0.59727
AFR1P	EUR4M	-0.278	EUR13P	EUR8M	0.59702
AFR1P	EUR4F	-0.238	EUR13P	EUR8F	0.599832
AFR1P	EUR3P	-0.204	EUR13P	EUR4P	0.596712
AFR1P	EUR3M	-0.253	EUR13P	EUR4M	0.589476
AFR1P	EUR3F	-0.28	EUR13P	EUR4F	0.592121
AFR1P	EUR1P	-0.182	EUR13P	EUR3P	0.593259
AFR1P	EUR1M	-0.269	EUR13P	EUR3M	0.598554
AFR1P	EUR1F	-0.198	EUR13P	EUR3F	0.586684
AFR1P	PUR1P	-0.182	EUR13P	EUR1P	0.59586
AFR1P	PUR1M	-0.197	EUR13P	EUR1M	0.595436
AFR1P	PUR1F	-0.044	EUR13P	EUR1F	0.608433
AFR1P	PUR2P	-0.127	EUR13P	PUR1P	0.580276
AFR1P	PUR2M	-0.113	EUR13P	PUR1M	0.587758
AFR1P	PUR2F	-0.131	EUR13P	PUR1F	0.585114
AFR1P	PUR3P	-0.025	EUR13P	PUR2P	0.587102
AFR1P	PUR3M	-0.072	EUR13P	PUR2M	0.594963
AFR1P	PUR3F	-0.089	EUR13P	PUR2F	0.583217
AFR1P	PUR4P	-0.175	EUR13P	PUR3P	0.571184
AFR1P	PUR4M	-0.206	EUR13P	PUR3M	0.575338
AFR1P	PUR4F	-0.338	EUR13P	PUR3F	0.576702
AFR1P	PUR5P	-0.205	EUR13P	PUR4P	0.592204
AFR1P	PUR5M	-0.147	EUR13P	PUR4M	0.599629
AFR1P	PUR5F	-0.099	EUR13P	PUR4F	0.568375
AFR1P	PUR6P	-0.248	EUR13P	PUR5P	0.576435
AFR1P	PUR6M	-0.201	EUR13P	PUR5M	0.590486
AFR1P	PUR6F	-0.146	EUR13P	PUR5F	0.580427
AFR1P	EUR15P	-0.182	EUR13P	PUR6P	0.586091
AFR1P	EUR15M	-0.151	EUR13P	PUR6M	0.574967
AFR1P	EUR15F	-0.17	EUR13P	PUR6F	0.595037
AFR1P	EUR2P	-0.249	EUR13P	EUR15P	0.584203
AFR1P	EUR2M	-0.246	EUR13P	EUR15M	0.59166
AFR1P	EUR2F	-0.218	EUR13P	EUR15F	0.566511
AFR1P	PUR7P	-0.066	EUR13P	EUR2P	0.588745
AFR1P	PUR7M	-0.058	EUR13P	EUR2M	0.5779
AFR1P	PUR7F	-0.126	EUR13P	EUR2F	0.597206
AFR1P	PUR8P	-0.118	EUR13P	PUR7P	0.590168
AFR1P	PUR8M	-0.047	EUR13P	PUR7M	0.581625
AFR1P	PUR8F	-0.146	EUR13P	PUR7F	0.590469
AFR1P	PUR9P	-0.189	EUR13P	PUR8P	0.58527
AFR1P	PUR9M	-0.211	EUR13P	PUR8M	0.589675
AFR1P	PUR9F	-0.15	EUR13P	PUR8F	0.577923
AFR1P	PUR10P	-0.264	EUR13P	PUR9P	0.581594
AFR1P	PUR10M	-0.253	EUR13P	PUR9M	0.576542
AFR1P	PUR10F	-0.238	EUR13P	PUR9F	0.58563
AFR1P	PUR11P	-0.167	EUR13P	PUR10P	0.600903
AFR1P	PUR11M	-0.103	EUR13P	PUR10M	0.59117
AFR1P	PUR11F	-0.113	EUR13P	PUR10F	0.581968
AFR1P	PUR12P	-0.104	EUR13P	PUR11P	0.56436
AFR1P	PUR12M	-0.167	EUR13P	PUR11M	0.578977
AFR1P	PUR12F	-0.214	EUR13P	PUR11F	0.574554
AFR1P	PUR13P	-0.214	EUR13P	PUR12P	0.578367
AFR1P	PUR13M	-0.244	EUR13P	PUR12M	0.576443
AFR1P	PUR13F	-0.196	EUR13P	PUR12F	0.580105
AFR1P	PUR14P	-0.157	EUR13P	PUR13P	0.597762
AFR1P	PUR14M	-0.204	EUR13P	PUR13M	0.598927
AFR1P	PUR14F	-0.133	EUR13P	PUR13F	0.591291
AFR1P	EUR14P	-0.148	EUR13P	PUR14P	0.584002
AFR1P	EUR14M	-0.254	EUR13P	PUR14M	0.568358
AFR1P	EUR14F	-0.281	EUR13P	PUR14F	0.569105
AFR1P	PUR15P	-0.208	EUR13P	EUR14P	0.599877
AFR1P	PUR15M	-0.094	EUR13P	EUR14M	0.595986
AFR1P	PUR15F	-0.134	EUR13P	EUR14F	0.587569
AFR1P	EUR9P	-0.243	EUR13P	PUR15P	0.593757
AFR1P	EUR9M	-0.286	EUR13P	PUR15M	0.600441
AFR1P	EUR9F	-0.284	EUR13P	PUR15F	0.573445
AFR1P	EUR10P	-0.219	EUR13P	EUR9P	0.59595
AFR1P	EUR10M	-0.146	EUR13P	EUR9M	0.582778
AFR1P	EUR10F	-0.153	EUR13P	EUR9F	0.589163
AFR1P	EUR5P	-0.211	EUR13P	EUR10P	0.59853
AFR1P	EUR5M	-0.099	EUR13P	EUR10M	0.615555
AFR1P	EUR5F	-0.175	EUR13P	EUR10F	0.599858
AFR1M	AFR1F	-0.137	EUR13P	EUR5P	0.583234
AFR1M	EUR13P	-0.381	EUR13P	EUR5M	0.579739
AFR1M	EUR13M	-0.353	EUR13P	EUR5F	0.578629
AFR1M	EUR13F	-0.363	EUR13M	AFR1P	0.565923
AFR1M	EUR6P	-0.326	EUR13M	AFR1M	0.578394
AFR1M	EUR6M	-0.377	EUR13M	AFR1F	0.572202
AFR1M	EUR6F	-0.383	EUR13M	EUR13F	0.556778
AFR1M	EUR11P	-0.447	EUR13M	EUR6P	0.588479
AFR1M	EUR11M	-0.265	EUR13M	EUR6M	0.593665
AFR1M	EUR11F	-0.337	EUR13M	EUR6F	0.601235
AFR1M	EUR12P	-0.322	EUR13M	EUR11P	0.588068
AFR1M	EUR12M	-0.215	EUR13M	EUR11M	0.607039
AFR1M	EUR12F	-0.279	EUR13M	EUR11F	0.587433
AFR1M	EUR8P	-0.3	EUR13M	EUR12P	0.587643
AFR1M	EUR8M	-0.278	EUR13M	EUR12M	0.581636
AFR1M	EUR8F	-0.391	EUR13M	EUR12F	0.592253
AFR1M	EUR4P	-0.34	EUR13M	EUR8P	0.617196
AFR1M	EUR4M	-0.377	EUR13M	EUR8M	0.60377
AFR1M	EUR4F	-0.272	EUR13M	EUR8F	0.604745
AFR1M	EUR3P	-0.269	EUR13M	EUR4P	0.60976
AFR1M	EUR3M	-0.281	EUR13M	EUR4M	0.607535
AFR1M	EUR3F	-0.459	EUR13M	EUR4F	0.612203
AFR1M	EUR1P	-0.274	EUR13M	EUR3P	0.601907
AFR1M	EUR1M	-0.36	EUR13M	EUR3M	0.599883
AFR1M	EUR1F	-0.222	EUR13M	EUR3F	0.603296
AFR1M	PUR1P	-0.235	EUR13M	EUR1P	0.612009
AFR1M	PUR1M	-0.283	EUR13M	EUR1M	0.607419
AFR1M	PUR1F	-0.096	EUR13M	EUR1F	0.596855
AFR1M	PUR2P	-0.231	EUR13M	PUR1P	0.59346
AFR1M	PUR2M	-0.169	EUR13M	PUR1M	0.590259
AFR1M	PUR2F	-0.288	EUR13M	PUR1F	0.590917
AFR1M	PUR3P	-0.126	EUR13M	PUR2P	0.586677
AFR1M	PUR3M	-0.089	EUR13M	PUR2M	0.580823
AFR1M	PUR3F	-0.211	EUR13M	PUR2F	0.600955
AFR1M	PUR4P	-0.24	EUR13M	PUR3P	0.580114
AFR1M	PUR4M	-0.244	EUR13M	PUR3M	0.585216
AFR1M	PUR4F	-0.382	EUR13M	PUR3F	0.582157
AFR1M	PUR5P	-0.299	EUR13M	PUR4P	0.604856
AFR1M	PUR5M	-0.232	EUR13M	PUR4M	0.600911
AFR1M	PUR5F	-0.277	EUR13M	PUR4F	0.5694
AFR1M	PUR6P	-0.224	EUR13M	PUR5P	0.597172
AFR1M	PUR6M	-0.319	EUR13M	PUR5M	0.599777
AFR1M	PUR6F	-0.213	EUR13M	PUR5F	0.581608
AFR1M	EUR15P	-0.28	EUR13M	PUR6P	0.59782
AFR1M	EUR15M	-0.276	EUR13M	PUR6M	0.588447
AFR1M	EUR15F	-0.339	EUR13M	PUR6F	0.5966
AFR1M	EUR2P	-0.37	EUR13M	EUR15P	0.574198
AFR1M	EUR2M	-0.321	EUR13M	EUR15M	0.583135
AFR1M	EUR2F	-0.226	EUR13M	EUR15F	0.581542
AFR1M	PUR7P	-0.202	EUR13M	EUR2P	0.601861
AFR1M	PUR7M	-0.212	EUR13M	EUR2M	0.606154
AFR1M	PUR7F	-0.181	EUR13M	EUR2F	0.592439
AFR1M	PUR8P	-0.225	EUR13M	PUR7P	0.592324
AFR1M	PUR8M	-0.117	EUR13M	PUR7M	0.591404
AFR1M	PUR8F	-0.195	EUR13M	PUR7F	0.589309
AFR1M	PUR9P	-0.253	EUR13M	PUR8P	0.59134
AFR1M	PUR9M	-0.295	EUR13M	PUR8M	0.581594
AFR1M	PUR9F	-0.282	EUR13M	PUR8F	0.598597
AFR1M	PUR10P	-0.302	EUR13M	PUR9P	0.581599
AFR1M	PUR10M	-0.344	EUR13M	PUR9M	0.579219
AFR1M	PUR10F	-0.251	EUR13M	PUR9F	0.592915
AFR1M	PUR11P	-0.21	EUR13M	PUR10P	0.602686
AFR1M	PUR11M	-0.198	EUR13M	PUR10M	0.582248
AFR1M	PUR11F	-0.112	EUR13M	PUR10F	0.600801
AFR1M	PUR12P	-0.198	EUR13M	PUR11P	0.574657
AFR1M	PUR12M	-0.265	EUR13M	PUR11M	0.587887
AFR1M	PUR12F	-0.338	EUR13M	PUR11F	0.581972
AFR1M	PUR13P	-0.293	EUR13M	PUR12P	0.592884
AFR1M	PUR13M	-0.32	EUR13M	PUR12M	0.593351
AFR1M	PUR13F	-0.323	EUR13M	PUR12F	0.588034
AFR1M	PUR14P	-0.273	EUR13M	PUR13P	0.587573
AFR1M	PUR14M	-0.247	EUR13M	PUR13M	0.574464
AFR1M	PUR14F	-0.207	EUR13M	PUR13F	0.601144
AFR1M	EUR14P	-0.275	EUR13M	PUR14P	0.592088
AFR1M	EUR14M	-0.337	EUR13M	PUR14M	0.587492
AFR1M	EUR14F	-0.358	EUR13M	PUR14F	0.583378
AFR1M	PUR15P	-0.283	EUR13M	EUR14P	0.584996
AFR1M	PUR15M	-0.166	EUR13M	EUR14M	0.581302
AFR1M	PUR15F	-0.25	EUR13M	EUR14F	0.59541
AFR1M	EUR9P	-0.274	EUR13M	PUR15P	0.593861
AFR1M	EUR9M	-0.304	EUR13M	PUR15M	0.595537
AFR1M	EUR9F	-0.358	EUR13M	PUR15F	0.58114
AFR1M	EUR10P	-0.278	EUR13M	EUR9P	0.609238
AFR1M	EUR10M	-0.217	EUR13M	EUR9M	0.602157
AFR1M	EUR10F	-0.316	EUR13M	EUR9F	0.595152
AFR1M	EUR5P	-0.327	EUR13M	EUR10P	0.619138
AFR1M	EUR5M	-0.242	EUR13M	EUR10M	0.599007
AFR1M	EUR5F	-0.352	EUR13M	EUR10F	0.611014
AFR1F	EUR13P	-0.207	EUR13M	EUR5P	0.578711
AFR1F	EUR13M	-0.215	EUR13M	EUR5M	0.58629
AFR1F	EUR13F	-0.233	EUR13M	EUR5F	0.603841
AFR1F	EUR6P	-0.172	EUR13F	AFR1P	0.569868
AFR1F	EUR6M	-0.209	EUR13F	AFR1M	0.574533
AFR1F	EUR6F	-0.254	EUR13F	AFR1F	0.558508
AFR1F	EUR11P	-0.236	EUR13F	EUR6P	0.594862
AFR1F	EUR11M	-0.127	EUR13F	EUR6M	0.590505
AFR1F	EUR11F	-0.231	EUR13F	EUR6F	0.594382
AFR1F	EUR12P	-0.221	EUR13F	EUR11P	0.60363
AFR1F	EUR12M	-0.175	EUR13F	EUR11M	0.587248
AFR1F	EUR12F	-0.203	EUR13F	EUR11F	0.604234
AFR1F	EUR8P	-0.122	EUR13F	EUR12P	0.578083
AFR1F	EUR8M	-0.158	EUR13F	EUR12M	0.567775
AFR1F	EUR8F	-0.239	EUR13F	EUR12F	0.580067
AFR1F	EUR4P	-0.164	EUR13F	EUR8P	0.587833
AFR1F	EUR4M	-0.225	EUR13F	EUR8M	0.59016
AFR1F	EUR4F	-0.236	EUR13F	EUR8F	0.600627
AFR1F	EUR3P	-0.24	EUR13F	EUR4P	0.591632
AFR1F	EUR3M	-0.297	EUR13F	EUR4M	0.59179
AFR1F	EUR3F	-0.248	EUR13F	EUR4F	0.590314
AFR1F	EUR1P	-0.231	EUR13F	EUR3P	0.591067
AFR1F	EUR1M	-0.26	EUR13F	EUR3M	0.590052
AFR1F	EUR1F	-0.212	EUR13F	EUR3F	0.586566
AFR1F	PUR1P	-0.16	EUR13F	EUR1P	0.59071
AFR1F	PUR1M	-0.177	EUR13F	EUR1M	0.593256
AFR1F	PUR1F	-0.095	EUR13F	EUR1F	0.604036
AFR1F	PUR2P	-0.163	EUR13F	PUR1P	0.57759
AFR1F	PUR2M	-0.145	EUR13F	PUR1M	0.586179
AFR1F	PUR2F	-0.157	EUR13F	PUR1F	0.580274
AFR1F	PUR3P	-0.024	EUR13F	PUR2P	0.580472
AFR1F	PUR3M	-0.104	EUR13F	PUR2M	0.586291
AFR1F	PUR3F	-0.089	EUR13F	PUR2F	0.583833
AFR1F	PUR4P	-0.144	EUR13F	PUR3P	0.567174
AFR1F	PUR4M	-0.19	EUR13F	PUR3M	0.56209
AFR1F	PUR4F	-0.347	EUR13F	PUR3F	0.571441
AFR1F	PUR5P	-0.235	EUR13F	PUR4P	0.562915
AFR1F	PUR5M	-0.118	EUR13F	PUR4M	0.593216
AFR1F	PUR5F	-0.167	EUR13F	PUR4F	0.553108
AFR1F	PUR6P	-0.223	EUR13F	PUR5P	0.558836
AFR1F	PUR6M	-0.17	EUR13F	PUR5M	0.572797
AFR1F	PUR6F	-0.178	EUR13F	PUR5F	0.569576
AFR1F	EUR15P	-0.229	EUR13F	PUR6P	0.581504
AFR1F	EUR15M	-0.21	EUR13F	PUR6M	0.564419
AFR1F	EUR15F	-0.243	EUR13F	PUR6F	0.598514
AFR1F	EUR2P	-0.233	EUR13F	EUR15P	0.579424
AFR1F	EUR2M	-0.308	EUR13F	EUR15M	0.586646
AFR1F	EUR2F	-0.164	EUR13F	EUR15F	0.587236
AFR1F	PUR7P	-0.073	EUR13F	EUR2P	0.582434
AFR1F	PUR7M	-0.06	EUR13F	EUR2M	0.592941
AFR1F	PUR7F	-0.185	EUR13F	EUR2F	0.586344
AFR1F	PUR8P	-0.109	EUR13F	PUR7P	0.583478
AFR1F	PUR8M	-0.07	EUR13F	PUR7M	0.564798
AFR1F	PUR8F	-0.079	EUR13F	PUR7F	0.598726
AFR1F	PUR9P	-0.131	EUR13F	PUR8P	0.580671
AFR1F	PUR9M	-0.158	EUR13F	PUR8M	0.586581
AFR1F	PUR9F	-0.123	EUR13F	PUR8F	0.579949
AFR1F	PUR10P	-0.221	EUR13F	PUR9P	0.581935
AFR1F	PUR10M	-0.296	EUR13F	PUR9M	0.572191
AFR1F	PUR10F	-0.238	EUR13F	PUR9F	0.59082
AFR1F	PUR11P	-0.134	EUR13F	PUR10P	0.598601
AFR1F	PUR11M	-0.139	EUR13F	PUR10M	0.600183
AFR1F	PUR11F	-0.095	EUR13F	PUR10F	0.584212
AFR1F	PUR12P	-0.085	EUR13F	PUR11P	0.569958
AFR1F	PUR12M	-0.202	EUR13F	PUR11M	0.582963
AFR1F	PUR12F	-0.201	EUR13F	PUR11F	0.576356
AFR1F	PUR13P	-0.274	EUR13F	PUR12P	0.585078
AFR1F	PUR13M	-0.25	EUR13F	PUR12M	0.570446
AFR1F	PUR13F	-0.222	EUR13F	PUR12F	0.586462
AFR1F	PUR14P	-0.151	EUR13F	PUR13P	0.586595
AFR1F	PUR14M	-0.195	EUR13F	PUR13M	0.600086
AFR1F	PUR14F	-0.118	EUR13F	PUR13F	0.570168
AFR1F	EUR14P	-0.174	EUR13F	PUR14P	0.574785
AFR1F	EUR14M	-0.219	EUR13F	PUR14M	0.573879
AFR1F	EUR14F	-0.208	EUR13F	PUR14F	0.571522
AFR1F	PUR15P	-0.214	EUR13F	EUR14P	0.599353
AFR1F	PUR15M	-0.183	EUR13F	EUR14M	0.610489
AFR1F	PUR15F	-0.166	EUR13F	EUR14F	0.582922
AFR1F	EUR9P	-0.246	EUR13F	PUR15P	0.588546
AFR1F	EUR9M	-0.286	EUR13F	PUR15M	0.586854
AFR1F	EUR9F	-0.305	EUR13F	PUR15F	0.588558
AFR1F	EUR10P	-0.291	EUR13F	EUR9P	0.574628
AFR1F	EUR10M	-0.085	EUR13F	EUR9M	0.568936
AFR1F	EUR10F	-0.253	EUR13F	EUR9F	0.581974
AFR1F	EUR5P	-0.226	EUR13F	EUR10P	0.603023
AFR1F	EUR5M	-0.077	EUR13F	EUR10M	0.61023
AFR1F	EUR5F	-0.206	EUR13F	EUR10F	0.590448
EUR13P	EUR13M	0.456	EUR13F	EUR5P	0.601891
EUR13P	EUR13F	0.437	EUR13F	EUR5M	0.616476
EUR13P	EUR6P	-0.102	EUR13F	EUR5F	0.566718
EUR13P	EUR6M	-0.036	EUR6P	AFR1P	0.581086
EUR13P	EUR6F	-0.131	EUR6P	AFR1M	0.592319
EUR13P	EUR11P	-0.104	EUR6P	AFR1F	0.577636
EUR13P	EUR11M	-0.035	EUR6P	EUR6M	0.762122
EUR13P	EUR11F	-0.093	EUR6P	EUR6F	0.771373
EUR13P	EUR12P	-0.113	EUR6P	EUR11P	0.592883
EUR13P	EUR12M	-0.124	EUR6P	EUR11M	0.601356
EUR13P	EUR12F	-0.06	EUR6P	EUR11F	0.605926
EUR13P	EUR8P	-0.098	EUR6P	EUR12P	0.60053
EUR13P	EUR8M	-0.065	EUR6P	EUR12M	0.604028
EUR13P	EUR8F	-0.018	EUR6P	EUR12F	0.601972
EUR13P	EUR4P	-0.043	EUR6P	EUR8P	0.615912
EUR13P	EUR4M	-0.103	EUR6P	EUR8M	0.613296
EUR13P	EUR4F	-0.067	EUR6P	EUR8F	0.602356
EUR13P	EUR3P	-0.101	EUR6P	EUR4P	0.594735
EUR13P	EUR3M	-0.036	EUR6P	EUR4M	0.603049
EUR13P	EUR3F	-0.188	EUR6P	EUR4F	0.599676
EUR13P	EUR1P	-0.099	EUR6P	EUR3P	0.613028
EUR13P	EUR1M	-0.101	EUR6P	EUR3M	0.599181
EUR13P	EUR1F	-0.161	EUR6P	EUR3F	0.594615
EUR13P	PUR1P	-0.157	EUR6P	EUR1P	0.592465
EUR13P	PUR1M	-0.01	EUR6P	EUR1M	0.585346
EUR13P	PUR1F	-0.041	EUR6P	EUR1F	0.607073
EUR13P	PUR2P	-0.033	EUR6P	PUR1P	0.593356
EUR13P	PUR2M	-0.06	EUR6P	PUR1M	0.583358
EUR13P	PUR2F	-0.064	EUR6P	PUR1F	0.589312
EUR13P	PUR3P	-0.111	EUR6P	PUR2P	0.592361
EUR13P	PUR3M	-0.057	EUR6P	PUR2M	0.587931
EUR13P	PUR3F	-0.301	EUR6P	PUR2F	0.58523
EUR13P	PUR4P	-0.173	EUR6P	PUR3P	0.593322
EUR13P	PUR4M	-0.1	EUR6P	PUR3M	0.594654
EUR13P	PUR4F	-0.313	EUR6P	PUR3F	0.596684
EUR13P	PUR5P	-0.121	EUR6P	PUR4P	0.586617
EUR13P	PUR5M	-0.071	EUR6P	PUR4M	0.58033
EUR13P	PUR5F	-0.034	EUR6P	PUR4F	0.579465
EUR13P	PUR6P	-0.062	EUR6P	PUR5P	0.611238
EUR13P	PUR6M	-0.052	EUR6P	PUR5M	0.592903
EUR13P	PUR6F	-0.044	EUR6P	PUR5F	0.604809
EUR13P	EUR15P	-0.101	EUR6P	PUR6P	0.596339
EUR13P	EUR15M	-0.006	EUR6P	PUR6M	0.614427
EUR13P	EUR15F	-0.114	EUR6P	PUR6F	0.600561
EUR13P	EUR2P	-0.153	EUR6P	EUR15P	0.587479
EUR13P	EUR2M	-0.124	EUR6P	EUR15M	0.593119
EUR13P	EUR2F	0.035	EUR6P	EUR15F	0.605273
EUR13P	PUR7P	-0.121	EUR6P	EUR2P	0.595094
EUR13P	PUR7M	-0.136	EUR6P	EUR2M	0.595718
EUR13P	PUR7F	-0.069	EUR6P	EUR2F	0.597356
EUR13P	PUR8P	-0.116	EUR6P	PUR7P	0.603295
EUR13P	PUR8M	-0.089	EUR6P	PUR7M	0.598084
EUR13P	PUR8F	-0.051	EUR6P	PUR7F	0.583285
EUR13P	PUR9P	-0.075	EUR6P	PUR8P	0.575235
EUR13P	PUR9M	-0.067	EUR6P	PUR8M	0.58551
EUR13P	PUR9F	-0.076	EUR6P	PUR8F	0.595119
EUR13P	PUR10P	-0.035	EUR6P	PUR9P	0.585025
EUR13P	PUR10M	-0.16	EUR6P	PUR9M	0.591238
EUR13P	PUR10F	-0.018	EUR6P	PUR9F	0.586804
EUR13P	PUR11P	-0.051	EUR6P	PUR10P	0.578513
EUR13P	PUR11M	-0.086	EUR6P	PUR10M	0.575086
EUR13P	PUR11F	-0.047	EUR6P	PUR10F	0.591355
EUR13P	PUR12P	-0.071	EUR6P	PUR11P	0.611363
EUR13P	PUR12M	-0.138	EUR6P	PUR11M	0.598218
EUR13P	PUR12F	-0.06	EUR6P	PUR11F	0.580789
EUR13P	PUR13P	-0.111	EUR6P	PUR12P	0.597654
EUR13P	PUR13M	-0.105	EUR6P	PUR12M	0.610724
EUR13P	PUR13F	-0.194	EUR6P	PUR12F	0.587496
EUR13P	PUR14P	-0.063	EUR6P	PUR13P	0.60018
EUR13P	PUR14M	-0.037	EUR6P	PUR13M	0.598176
EUR13P	PUR14F	-0.092	EUR6P	PUR13F	0.586859
EUR13P	EUR14P	0.016	EUR6P	PUR14P	0.597035
EUR13P	EUR14M	-0.034	EUR6P	PUR14M	0.587374
EUR13P	EUR14F	-0.047	EUR6P	PUR14F	0.616577
EUR13P	PUR15P	-0.232	EUR6P	EUR14P	0.583913
EUR13P	PUR15M	-0.121	EUR6P	EUR14M	0.597479
EUR13P	PUR15F	-0.099	EUR6P	EUR14F	0.572811
EUR13P	EUR9P	-0.064	EUR6P	PUR15P	0.599527
EUR13P	EUR9M	-0.011	EUR6P	PUR15M	0.596324
EUR13P	EUR9F	-0.145	EUR6P	PUR15F	0.594593
EUR13P	EUR10P	-0.103	EUR6P	EUR9P	0.593977
EUR13P	EUR10M	0.056	EUR6P	EUR9M	0.586589
EUR13P	EUR10F	-0.076	EUR6P	EUR9F	0.584734
EUR13P	EUR5P	-0.128	EUR6P	EUR10P	0.592984
EUR13P	EUR5M	-0.026	EUR6P	EUR10M	0.584143
EUR13P	EUR5F	-0.097	EUR6P	EUR10F	0.602422
EUR13M	EUR13F	-0.135	EUR6P	EUR5P	0.601293
EUR13M	EUR6P	-0.06	EUR6P	EUR5M	0.596886
EUR13M	EUR6M	-0.055	EUR6P	EUR5F	0.622932
EUR13M	EUR6F	-0.046	EUR6M	AFR1P	0.585762
EUR13M	EUR11P	-0.105	EUR6M	AFR1M	0.589764
EUR13M	EUR11M	0.038	EUR6M	AFR1F	0.578006
EUR13M	EUR11F	-0.068	EUR6M	EUR6F	0.561841
EUR13M	EUR12P	-0.011	EUR6M	EUR11P	0.594854
EUR13M	EUR12M	-0.027	EUR6M	EUR11M	0.593939
EUR13M	EUR12F	-0.071	EUR6M	EUR11F	0.597359
EUR13M	EUR8P	-0.043	EUR6M	EUR12P	0.582725
EUR13M	EUR8M	0.022	EUR6M	EUR12M	0.58588
EUR13M	EUR8F	0.017	EUR6M	EUR12F	0.599946
EUR13M	EUR4P	-0.036	EUR6M	EUR8P	0.609187
EUR13M	EUR4M	-0.084	EUR6M	EUR8M	0.611595
EUR13M	EUR4F	-0.108	EUR6M	EUR8F	0.594853
EUR13M	EUR3P	-0.048	EUR6M	EUR4P	0.586448
EUR13M	EUR3M	-0.08	EUR6M	EUR4M	0.590119
EUR13M	EUR3F	-0.135	EUR6M	EUR4F	0.594912
EUR13M	EUR1P	-0.08	EUR6M	EUR3P	0.609649
EUR13M	EUR1M	-0.051	EUR6M	EUR3M	0.616246
EUR13M	EUR1F	-0.079	EUR6M	EUR3F	0.601944
EUR13M	PUR1P	-0.174	EUR6M	EUR1P	0.595544
EUR13M	PUR1M	-0.072	EUR6M	EUR1M	0.596963
EUR13M	PUR1F	-0.111	EUR6M	EUR1F	0.592284
EUR13M	PUR2P	-0.064	EUR6M	PUR1P	0.585475
EUR13M	PUR2M	-0.047	EUR6M	PUR1M	0.595651
EUR13M	PUR2F	0	EUR6M	PUR1F	0.579641
EUR13M	PUR3P	-0.128	EUR6M	PUR2P	0.610554
EUR13M	PUR3M	-0.052	EUR6M	PUR2M	0.608839
EUR13M	PUR3F	-0.232	EUR6M	PUR2F	0.596466
EUR13M	PUR4P	-0.025	EUR6M	PUR3P	0.592761
EUR13M	PUR4M	-0.098	EUR6M	PUR3M	0.589036
EUR13M	PUR4F	-0.254	EUR6M	PUR3F	0.603724
EUR13M	PUR5P	-0.079	EUR6M	PUR4P	0.584586
EUR13M	PUR5M	0	EUR6M	PUR4M	0.572434
EUR13M	PUR5F	0.049	EUR6M	PUR4F	0.584579
EUR13M	PUR6P	-0.065	EUR6M	PUR5P	0.590792
EUR13M	PUR6M	-0.027	EUR6M	PUR5M	0.5784
EUR13M	PUR6F	-0.016	EUR6M	PUR5F	0.5961
EUR13M	EUR15P	0	EUR6M	PUR6P	0.59038
EUR13M	EUR15M	0.078	EUR6M	PUR6M	0.599853
EUR13M	EUR15F	-0.12	EUR6M	PUR6F	0.590112
EUR13M	EUR2P	-0.059	EUR6M	EUR15P	0.584808
EUR13M	EUR2M	-0.05	EUR6M	EUR15M	0.583396
EUR13M	EUR2F	0.017	EUR6M	EUR15F	0.590712
EUR13M	PUR7P	-0.056	EUR6M	EUR2P	0.594928
EUR13M	PUR7M	-0.036	EUR6M	EUR2M	0.584548
EUR13M	PUR7F	-0.099	EUR6M	EUR2F	0.596303
EUR13M	PUR8P	-0.078	EUR6M	PUR7P	0.606752
EUR13M	PUR8M	-0.052	EUR6M	PUR7M	0.59356
EUR13M	PUR8F	-0.065	EUR6M	PUR7F	0.588367
EUR13M	PUR9P	0.015	EUR6M	PUR8P	0.570007
EUR13M	PUR9M	-0.011	EUR6M	PUR8M	0.575991
EUR13M	PUR9F	-0.042	EUR6M	PUR8F	0.594959
EUR13M	PUR10P	0.011	EUR6M	PUR9P	0.586349
EUR13M	PUR10M	-0.102	EUR6M	PUR9M	0.596358
EUR13M	PUR10F	0.024	EUR6M	PUR9F	0.580716
EUR13M	PUR11P	-0.079	EUR6M	PUR10P	0.597422
EUR13M	PUR11M	-0.061	EUR6M	PUR10M	0.591524
EUR13M	PUR11F	0.03	EUR6M	PUR10F	0.585738
EUR13M	PUR12P	0.005	EUR6M	PUR11P	0.590375
EUR13M	PUR12M	-0.056	EUR6M	PUR11M	0.596124
EUR13M	PUR12F	-0.115	EUR6M	PUR11F	0.576976
EUR13M	PUR13P	-0.061	EUR6M	PUR12P	0.601939
EUR13M	PUR13M	-0.055	EUR6M	PUR12M	0.57716
EUR13M	PUR13F	-0.037	EUR6M	PUR12F	0.602778
EUR13M	PUR14P	-0.005	EUR6M	PUR13P	0.591184
EUR13M	PUR14M	-0.042	EUR6M	PUR13M	0.595415
EUR13M	PUR14F	0.005	EUR6M	PUR13F	0.592864
EUR13M	EUR14P	0.048	EUR6M	PUR14P	0.582185
EUR13M	EUR14M	-0.039	EUR6M	PUR14M	0.585995
EUR13M	EUR14F	-0.08	EUR6M	PUR14F	0.588929
EUR13M	PUR15P	-0.106	EUR6M	EUR14P	0.58768
EUR13M	PUR15M	-0.024	EUR6M	EUR14M	0.59822
EUR13M	PUR15F	-0.028	EUR6M	EUR14F	0.569498
EUR13M	EUR9P	0.005	EUR6M	PUR15P	0.585125
EUR13M	EUR9M	-0.044	EUR6M	PUR15M	0.589087
EUR13M	EUR9F	-0.117	EUR6M	PUR15F	0.584875
EUR13M	EUR10P	-0.05	EUR6M	EUR9P	0.586834
EUR13M	EUR10M	0.073	EUR6M	EUR9M	0.60161
EUR13M	EUR10F	-0.017	EUR6M	EUR9F	0.572663
EUR13M	EUR5P	-0.058	EUR6M	EUR10P	0.591054
EUR13M	EUR5M	0.05	EUR6M	EUR10M	0.601413
EUR13M	EUR5F	-0.024	EUR6M	EUR10F	0.592888
EUR13F	EUR6P	-0.155	EUR6M	EUR5P	0.602183
EUR13F	EUR6M	0.006	EUR6M	EUR5M	0.591274
EUR13F	EUR6F	-0.194	EUR6M	EUR5F	0.605684
EUR13F	EUR11P	-0.107	EUR6F	AFR1P	0.580454
EUR13F	EUR11M	-0.052	EUR6F	AFR1M	0.588002
EUR13F	EUR11F	-0.099	EUR6F	AFR1F	0.574246
EUR13F	EUR12P	-0.091	EUR6F	EUR11P	0.594708
EUR13F	EUR12M	-0.14	EUR6F	EUR11M	0.601716
EUR13F	EUR12F	0.006	EUR6F	EUR11F	0.634191
EUR13F	EUR8P	-0.17	EUR6F	EUR12P	0.589512
EUR13F	EUR8M	-0.035	EUR6F	EUR12M	0.624429
EUR13F	EUR8F	-0.093	EUR6F	EUR12F	0.590532
EUR13F	EUR4P	-0.165	EUR6F	EUR8P	0.629906
EUR13F	EUR4M	-0.187	EUR6F	EUR8M	0.603438
EUR13F	EUR4F	-0.109	EUR6F	EUR8F	0.624347
EUR13F	EUR3P	-0.1	EUR6F	EUR4P	0.600208
EUR13F	EUR3M	-0.137	EUR6F	EUR4M	0.604694
EUR13F	EUR3F	-0.185	EUR6F	EUR4F	0.622532
EUR13F	EUR1P	-0.199	EUR6F	EUR3P	0.599868
EUR13F	EUR1M	-0.063	EUR6F	EUR3M	0.597596
EUR13F	EUR1F	-0.158	EUR6F	EUR3F	0.617535
EUR13F	PUR1P	-0.15	EUR6F	EUR1P	0.633627
EUR13F	PUR1M	0.01	EUR6F	EUR1M	0.61141
EUR13F	PUR1F	-0.02	EUR6F	EUR1F	0.606992
EUR13F	PUR2P	-0.102	EUR6F	PUR1P	0.597821
EUR13F	PUR2M	-0.126	EUR6F	PUR1M	0.584638
EUR13F	PUR2F	-0.127	EUR6F	PUR1F	0.606826
EUR13F	PUR3P	-0.143	EUR6F	PUR2P	0.582238
EUR13F	PUR3M	-0.087	EUR6F	PUR2M	0.588015
EUR13F	PUR3F	-0.253	EUR6F	PUR2F	0.608121
EUR13F	PUR4P	-0.167	EUR6F	PUR3P	0.583589
EUR13F	PUR4M	-0.142	EUR6F	PUR3M	0.618588
EUR13F	PUR4F	-0.393	EUR6F	PUR3F	0.56235
EUR13F	PUR5P	-0.21	EUR6F	PUR4P	0.60287
EUR13F	PUR5M	-0.068	EUR6F	PUR4M	0.590231
EUR13F	PUR5F	-0.124	EUR6F	PUR4F	0.595215
EUR13F	PUR6P	-0.153	EUR6F	PUR5P	0.626873
EUR13F	PUR6M	-0.131	EUR6F	PUR5M	0.59119
EUR13F	PUR6F	-0.07	EUR6F	PUR5F	0.61636
EUR13F	EUR15P	-0.187	EUR6F	PUR6P	0.627394
EUR13F	EUR15M	-0.041	EUR6F	PUR6M	0.623961
EUR13F	EUR15F	-0.106	EUR6F	PUR6F	0.607844
EUR13F	EUR2P	-0.1	EUR6F	EUR15P	0.594806
EUR13F	EUR2M	-0.219	EUR6F	EUR15M	0.597983
EUR13F	EUR2F	0.024	EUR6F	EUR15F	0.606616
EUR13F	PUR7P	-0.041	EUR6F	EUR2P	0.619088
EUR13F	PUR7M	-0.079	EUR6F	EUR2M	0.615161
EUR13F	PUR7F	-0.148	EUR6F	EUR2F	0.624801
EUR13F	PUR8P	-0.158	EUR6F	PUR7P	0.5907
EUR13F	PUR8M	-0.095	EUR6F	PUR7M	0.584148
EUR13F	PUR8F	-0.05	EUR6F	PUR7F	0.598626
EUR13F	PUR9P	-0.074	EUR6F	PUR8P	0.59202
EUR13F	PUR9M	-0.043	EUR6F	PUR8M	0.59521
EUR13F	PUR9F	-0.068	EUR6F	PUR8F	0.614283
EUR13F	PUR10P	-0.102	EUR6F	PUR9P	0.600066
EUR13F	PUR10M	-0.187	EUR6F	PUR9M	0.59724
EUR13F	PUR10F	-0.041	EUR6F	PUR9F	0.586131
EUR13F	PUR11P	-0.086	EUR6F	PUR10P	0.616914
EUR13F	PUR11M	-0.117	EUR6F	PUR10M	0.617185
EUR13F	PUR11F	-0.015	EUR6F	PUR10F	0.609799
EUR13F	PUR12P	-0.071	EUR6F	PUR11P	0.588418
EUR13F	PUR12M	-0.119	EUR6F	PUR11M	0.605722
EUR13F	PUR12F	-0.048	EUR6F	PUR11F	0.573932
EUR13F	PUR13P	-0.15	EUR6F	PUR12P	0.621817
EUR13F	PUR13M	-0.147	EUR6F	PUR12M	0.617076
EUR13F	PUR13F	-0.269	EUR6F	PUR12F	0.600436
EUR13F	PUR14P	-0.136	EUR6F	PUR13P	0.616165
EUR13F	PUR14M	-0.107	EUR6F	PUR13M	0.594704
EUR13F	PUR14F	-0.048	EUR6F	PUR13F	0.627858
EUR13F	EUR14P	-0.005	EUR6F	PUR14P	0.60683
EUR13F	EUR14M	0.011	EUR6F	PUR14M	0.617146
EUR13F	EUR14F	-0.147	EUR6F	PUR14F	0.600281
EUR13F	PUR15P	-0.218	EUR6F	EUR14P	0.584101
EUR13F	PUR15M	-0.084	EUR6F	EUR14M	0.594786
EUR13F	PUR15F	-0.121	EUR6F	EUR14F	0.612027
EUR13F	EUR9P	-0.029	EUR6F	PUR15P	0.603559
EUR13F	EUR9M	0.016	EUR6F	PUR15M	0.610623
EUR13F	EUR9F	-0.093	EUR6F	PUR15F	0.588593
EUR13F	EUR10P	-0.169	EUR6F	EUR9P	0.606279
EUR13F	EUR10M	0	EUR6F	EUR9M	0.625081
EUR13F	EUR10F	-0.165	EUR6F	EUR9F	0.585084
EUR13F	EUR5P	-0.254	EUR6F	EUR10P	0.625971
EUR13F	EUR5M	0.031	EUR6F	EUR10M	0.589769
EUR13F	EUR5F	-0.204	EUR6F	EUR10F	0.624429
EUR6P	EUR6M	0.487	EUR6F	EUR5P	0.596683
EUR6P	EUR6F	0.411	EUR6F	EUR5M	0.626447
EUR6P	EUR11P	-0.022	EUR6F	EUR5F	0.599482
EUR6P	EUR11M	0.047	EUR11P	AFR1P	0.570868
EUR6P	EUR11F	0.011	EUR11P	AFR1M	0.565208
EUR6P	EUR12P	-0.089	EUR11P	AFR1F	0.578386
EUR6P	EUR12M	-0.042	EUR11P	EUR11M	0.761877
EUR6P	EUR12F	-0.016	EUR11P	EUR11F	0.76281
EUR6P	EUR8P	-0.071	EUR11P	EUR12P	0.596407
EUR6P	EUR8M	-0.056	EUR11P	EUR12M	0.59649
EUR6P	EUR8F	-0.011	EUR11P	EUR12F	0.59248
EUR6P	EUR4P	-0.123	EUR11P	EUR8P	0.599443
EUR6P	EUR4M	-0.117	EUR11P	EUR8M	0.607561
EUR6P	EUR4F	-0.135	EUR11P	EUR8F	0.601962
EUR6P	EUR3P	-0.091	EUR11P	EUR4P	0.596804
EUR6P	EUR3M	-0.049	EUR11P	EUR4M	0.598036
EUR6P	EUR3F	-0.131	EUR11P	EUR4F	0.585792
EUR6P	EUR1P	-0.083	EUR11P	EUR3P	0.583847
EUR6P	EUR1M	-0.135	EUR11P	EUR3M	0.588771
EUR6P	EUR1F	-0.067	EUR11P	EUR3F	0.585927
EUR6P	PUR1P	-0.111	EUR11P	EUR1P	0.596425
EUR6P	PUR1M	-0.073	EUR11P	EUR1M	0.587625
EUR6P	PUR1F	0.047	EUR11P	EUR1F	0.595889
EUR6P	PUR2P	-0.058	EUR11P	PUR1P	0.591574
EUR6P	PUR2M	-0.04	EUR11P	PUR1M	0.590247
EUR6P	PUR2F	-0.01	EUR11P	PUR1F	0.586618
EUR6P	PUR3P	-0.092	EUR11P	PUR2P	0.589031
EUR6P	PUR3M	-0.075	EUR11P	PUR2M	0.583096
EUR6P	PUR3F	-0.291	EUR11P	PUR2F	0.568403
EUR6P	PUR4P	-0.168	EUR11P	PUR3P	0.581242
EUR6P	PUR4M	-0.128	EUR11P	PUR3M	0.56963
EUR6P	PUR4F	-0.365	EUR11P	PUR3F	0.5722
EUR6P	PUR5P	-0.109	EUR11P	PUR4P	0.576185
EUR6P	PUR5M	0.031	EUR11P	PUR4M	0.61066
EUR6P	PUR5F	-0.08	EUR11P	PUR4F	0.549732
EUR6P	PUR6P	-0.124	EUR11P	PUR5P	0.574612
EUR6P	PUR6M	-0.071	EUR11P	PUR5M	0.588747
EUR6P	PUR6F	-0.076	EUR11P	PUR5F	0.567483
EUR6P	EUR15P	-0.152	EUR11P	PUR6P	0.574112
EUR6P	EUR15M	-0.072	EUR11P	PUR6M	0.566363
EUR6P	EUR15F	-0.128	EUR11P	PUR6F	0.589101
EUR6P	EUR2P	0.017	EUR11P	EUR15P	0.588553
EUR6P	EUR2M	-0.06	EUR11P	EUR15M	0.586311
EUR6P	EUR2F	-0.017	EUR11P	EUR15F	0.585615
EUR6P	PUR7P	-0.015	EUR11P	EUR2P	0.589971
EUR6P	PUR7M	-0.034	EUR11P	EUR2M	0.569742
EUR6P	PUR7F	-0.161	EUR11P	EUR2F	0.586004
EUR6P	PUR8P	-0.139	EUR11P	PUR7P	0.603273
EUR6P	PUR8M	-0.105	EUR11P	PUR7M	0.595743
EUR6P	PUR8F	-0.125	EUR11P	PUR7F	0.59452
EUR6P	PUR9P	-0.02	EUR11P	PUR8P	0.583538
EUR6P	PUR9M	-0.091	EUR11P	PUR8M	0.571079
EUR6P	PUR9F	-0.033	EUR11P	PUR8F	0.583486
EUR6P	PUR10P	-0.054	EUR11P	PUR9P	0.590233
EUR6P	PUR10M	-0.121	EUR11P	PUR9M	0.578675
EUR6P	PUR10F	-0.093	EUR11P	PUR9F	0.586825
EUR6P	PUR11P	-0.13	EUR11P	PUR10P	0.591229
EUR6P	PUR11M	-0.099	EUR11P	PUR10M	0.582292
EUR6P	PUR11F	-0.053	EUR11P	PUR10F	0.585575
EUR6P	PUR12P	-0.05	EUR11P	PUR11P	0.581085
EUR6P	PUR12M	-0.031	EUR11P	PUR11M	0.583428
EUR6P	PUR12F	-0.14	EUR11P	PUR11F	0.585534
EUR6P	PUR13P	-0.049	EUR11P	PUR12P	0.575477
EUR6P	PUR13M	-0.048	EUR11P	PUR12M	0.57334
EUR6P	PUR13F	-0.103	EUR11P	PUR12F	0.58696
EUR6P	PUR14P	0	EUR11P	PUR13P	0.591401
EUR6P	PUR14M	-0.076	EUR11P	PUR13M	0.591729
EUR6P	PUR14F	0.025	EUR11P	PUR13F	0.577141
EUR6P	EUR14P	-0.01	EUR11P	PUR14P	0.568557
EUR6P	EUR14M	-0.062	EUR11P	PUR14M	0.558349
EUR6P	EUR14F	-0.095	EUR11P	PUR14F	0.579733
EUR6P	PUR15P	-0.084	EUR11P	EUR14P	0.602053
EUR6P	PUR15M	-0.029	EUR11P	EUR14M	0.609734
EUR6P	PUR15F	-0.011	EUR11P	EUR14F	0.587275
EUR6P	EUR9P	-0.047	EUR11P	PUR15P	0.591631
EUR6P	EUR9M	-0.01	EUR11P	PUR15M	0.579769
EUR6P	EUR9F	0.038	EUR11P	PUR15F	0.594564
EUR6P	EUR10P	-0.192	EUR11P	EUR9P	0.59559
EUR6P	EUR10M	0.035	EUR11P	EUR9M	0.579999
EUR6P	EUR10F	-0.147	EUR11P	EUR9F	0.584632
EUR6P	EUR5P	-0.125	EUR11P	EUR10P	0.592598
EUR6P	EUR5M	0.058	EUR11P	EUR10M	0.605398
EUR6P	EUR5F	0.051	EUR11P	EUR10F	0.589597
EUR6M	EUR6F	-0.092	EUR11P	EUR5P	0.56201
EUR6M	EUR11P	-0.074	EUR11P	EUR5M	0.551453
EUR6M	EUR11M	0.027	EUR11P	EUR5F	0.590986
EUR6M	EUR11F	0.057	EUR11M	AFR1P	0.57624
EUR6M	EUR12P	-0.051	EUR11M	AFR1M	0.57932
EUR6M	EUR12M	-0.062	EUR11M	AFR1F	0.584091
EUR6M	EUR12F	0.022	EUR11M	EUR11F	0.566346
EUR6M	EUR8P	0	EUR11M	EUR12P	0.591468
EUR6M	EUR8M	0	EUR11M	EUR12M	0.609315
EUR6M	EUR8F	-0.006	EUR11M	EUR12F	0.590547
EUR6M	EUR4P	-0.106	EUR11M	EUR8P	0.600256
EUR6M	EUR4M	-0.139	EUR11M	EUR8M	0.588354
EUR6M	EUR4F	-0.086	EUR11M	EUR8F	0.602411
EUR6M	EUR3P	-0.024	EUR11M	EUR4P	0.602296
EUR6M	EUR3M	-0.057	EUR11M	EUR4M	0.593826
EUR6M	EUR3F	-0.111	EUR11M	EUR4F	0.610268
EUR6M	EUR1P	-0.167	EUR11M	EUR3P	0.599839
EUR6M	EUR1M	-0.121	EUR11M	EUR3M	0.593504
EUR6M	EUR1F	-0.064	EUR11M	EUR3F	0.606951
EUR6M	PUR1P	-0.103	EUR11M	EUR1P	0.604235
EUR6M	PUR1M	-0.054	EUR11M	EUR1M	0.595877
EUR6M	PUR1F	0.048	EUR11M	EUR1F	0.606033
EUR6M	PUR2P	-0.038	EUR11M	PUR1P	0.598166
EUR6M	PUR2M	0.005	EUR11M	PUR1M	0.608285
EUR6M	PUR2F	-0.046	EUR11M	PUR1F	0.590752
EUR6M	PUR3P	-0.103	EUR11M	PUR2P	0.599506
EUR6M	PUR3M	-0.079	EUR11M	PUR2M	0.601964
EUR6M	PUR3F	-0.229	EUR11M	PUR2F	0.593897
EUR6M	PUR4P	-0.189	EUR11M	PUR3P	0.58739
EUR6M	PUR4M	-0.122	EUR11M	PUR3M	0.591875
EUR6M	PUR4F	-0.382	EUR11M	PUR3F	0.584486
EUR6M	PUR5P	-0.101	EUR11M	PUR4P	0.580203
EUR6M	PUR5M	0.032	EUR11M	PUR4M	0.585958
EUR6M	PUR5F	-0.149	EUR11M	PUR4F	0.567784
EUR6M	PUR6P	-0.042	EUR11M	PUR5P	0.598178
EUR6M	PUR6M	-0.059	EUR11M	PUR5M	0.59409
EUR6M	PUR6F	-0.132	EUR11M	PUR5F	0.588623
EUR6M	EUR15P	-0.081	EUR11M	PUR6P	0.590435
EUR6M	EUR15M	-0.127	EUR11M	PUR6M	0.590848
EUR6M	EUR15F	-0.123	EUR11M	PUR6F	0.59269
EUR6M	EUR2P	-0.023	EUR11M	EUR15P	0.588773
EUR6M	EUR2M	-0.06	EUR11M	EUR15M	0.585307
EUR6M	EUR2F	0.011	EUR11M	EUR15F	0.589376
EUR6M	PUR7P	-0.02	EUR11M	EUR2P	0.605162
EUR6M	PUR7M	-0.046	EUR11M	EUR2M	0.584884
EUR6M	PUR7F	-0.115	EUR11M	EUR2F	0.597168
EUR6M	PUR8P	-0.085	EUR11M	PUR7P	0.598683
EUR6M	PUR8M	-0.089	EUR11M	PUR7M	0.598701
EUR6M	PUR8F	-0.095	EUR11M	PUR7F	0.599455
EUR6M	PUR9P	0	EUR11M	PUR8P	0.584939
EUR6M	PUR9M	-0.058	EUR11M	PUR8M	0.585647
EUR6M	PUR9F	-0.065	EUR11M	PUR8F	0.593049
EUR6M	PUR10P	0.006	EUR11M	PUR9P	0.598989
EUR6M	PUR10M	-0.07	EUR11M	PUR9M	0.593587
EUR6M	PUR10F	-0.067	EUR11M	PUR9F	0.585107
EUR6M	PUR11P	-0.131	EUR11M	PUR10P	0.597395
EUR6M	PUR11M	-0.122	EUR11M	PUR10M	0.58573
EUR6M	PUR11F	-0.045	EUR11M	PUR10F	0.594144
EUR6M	PUR12P	-0.02	EUR11M	PUR11P	0.586583
EUR6M	PUR12M	-0.032	EUR11M	PUR11M	0.586492
EUR6M	PUR12F	-0.171	EUR11M	PUR11F	0.594879
EUR6M	PUR13P	0.005	EUR11M	PUR12P	0.592837
EUR6M	PUR13M	-0.159	EUR11M	PUR12M	0.59525
EUR6M	PUR13F	-0.108	EUR11M	PUR12F	0.585325
EUR6M	PUR14P	-0.027	EUR11M	PUR13P	0.598619
EUR6M	PUR14M	-0.066	EUR11M	PUR13M	0.583406
EUR6M	PUR14F	-0.057	EUR11M	PUR13F	0.601549
EUR6M	EUR14P	0.005	EUR11M	PUR14P	0.565599
EUR6M	EUR14M	0.027	EUR11M	PUR14M	0.571443
EUR6M	EUR14F	-0.067	EUR11M	PUR14F	0.585497
EUR6M	PUR15P	-0.094	EUR11M	EUR14P	0.594939
EUR6M	PUR15M	-0.07	EUR11M	EUR14M	0.591972
EUR6M	PUR15F	-0.054	EUR11M	EUR14F	0.602605
EUR6M	EUR9P	-0.026	EUR11M	PUR15P	0.603088
EUR6M	EUR9M	-0.01	EUR11M	PUR15M	0.593088
EUR6M	EUR9F	0.039	EUR11M	PUR15F	0.594839
EUR6M	EUR10P	-0.2	EUR11M	EUR9P	0.605265
EUR6M	EUR10M	0.015	EUR11M	EUR9M	0.589543
EUR6M	EUR10F	-0.131	EUR11M	EUR9F	0.59318
EUR6M	EUR5P	-0.201	EUR11M	EUR10P	0.600361
EUR6M	EUR5M	0.025	EUR11M	EUR10M	0.587579
EUR6M	EUR5F	-0.066	EUR11M	EUR10F	0.606743
EUR6F	EUR11P	-0.099	EUR11M	EUR5P	0.579958
EUR6F	EUR11M	-0.006	EUR11M	EUR5M	0.589566
EUR6F	EUR11F	-0.133	EUR11M	EUR5F	0.587342
EUR6F	EUR12P	-0.141	EUR11F	AFR1P	0.571588
EUR6F	EUR12M	-0.171	EUR11F	AFR1M	0.578594
EUR6F	EUR12F	-0.102	EUR11F	AFR1F	0.569334
EUR6F	EUR8P	-0.101	EUR11F	EUR12P	0.606936
EUR6F	EUR8M	-0.063	EUR11F	EUR12M	0.630833
EUR6F	EUR8F	-0.171	EUR11F	EUR12F	0.595317
EUR6F	EUR4P	-0.203	EUR11F	EUR8P	0.632595
EUR6F	EUR4M	-0.158	EUR11F	EUR8M	0.613693
EUR6F	EUR4F	-0.17	EUR11F	EUR8F	0.620396
EUR6F	EUR3P	-0.169	EUR11F	EUR4P	0.608338
EUR6F	EUR3M	-0.18	EUR11F	EUR4M	0.608303
EUR6F	EUR3F	-0.209	EUR11F	EUR4F	0.618928
EUR6F	EUR1P	-0.222	EUR11F	EUR3P	0.589299
EUR6F	EUR1M	-0.226	EUR11F	EUR3M	0.599497
EUR6F	EUR1F	-0.18	EUR11F	EUR3F	0.604424
EUR6F	PUR1P	-0.162	EUR11F	EUR1P	0.635475
EUR6F	PUR1M	-0.126	EUR11F	EUR1M	0.603167
EUR6F	PUR1F	-0.051	EUR11F	EUR1F	0.605085
EUR6F	PUR2P	-0.153	EUR11F	PUR1P	0.596327
EUR6F	PUR2M	-0.079	EUR11F	PUR1M	0.593324
EUR6F	PUR2F	-0.126	EUR11F	PUR1F	0.591084
EUR6F	PUR3P	-0.18	EUR11F	PUR2P	0.572232
EUR6F	PUR3M	-0.072	EUR11F	PUR2M	0.565908
EUR6F	PUR3F	-0.309	EUR11F	PUR2F	0.608811
EUR6F	PUR4P	-0.139	EUR11F	PUR3P	0.594843
EUR6F	PUR4M	-0.127	EUR11F	PUR3M	0.608677
EUR6F	PUR4F	-0.384	EUR11F	PUR3F	0.586482
EUR6F	PUR5P	-0.141	EUR11F	PUR4P	0.581619
EUR6F	PUR5M	-0.091	EUR11F	PUR4M	0.588179
EUR6F	PUR5F	-0.149	EUR11F	PUR4F	0.594127
EUR6F	PUR6P	-0.214	EUR11F	PUR5P	0.605206
EUR6F	PUR6M	-0.105	EUR11F	PUR5M	0.585513
EUR6F	PUR6F	-0.157	EUR11F	PUR5F	0.628868
EUR6F	EUR15P	-0.166	EUR11F	PUR6P	0.623967
EUR6F	EUR15M	-0.062	EUR11F	PUR6M	0.613719
EUR6F	EUR15F	-0.216	EUR11F	PUR6F	0.61005
EUR6F	EUR2P	-0.074	EUR11F	EUR15P	0.594488
EUR6F	EUR2M	-0.063	EUR11F	EUR15M	0.597811
EUR6F	EUR2F	-0.117	EUR11F	EUR15F	0.590024
EUR6F	PUR7P	-0.12	EUR11F	EUR2P	0.623775
EUR6F	PUR7M	-0.188	EUR11F	EUR2M	0.589844
EUR6F	PUR7F	-0.198	EUR11F	EUR2F	0.622195
EUR6F	PUR8P	-0.221	EUR11F	PUR7P	0.592152
EUR6F	PUR8M	-0.187	EUR11F	PUR7M	0.59185
EUR6F	PUR8F	-0.268	EUR11F	PUR7F	0.594128
EUR6F	PUR9P	-0.099	EUR11F	PUR8P	0.584251
EUR6F	PUR9M	-0.11	EUR11F	PUR8M	0.586792
EUR6F	PUR9F	-0.159	EUR11F	PUR8F	0.602109
EUR6F	PUR10P	-0.213	EUR11F	PUR9P	0.591581
EUR6F	PUR10M	-0.128	EUR11F	PUR9M	0.586891
EUR6F	PUR10F	-0.15	EUR11F	PUR9F	0.569464
EUR6F	PUR11P	-0.18	EUR11F	PUR10P	0.60747
EUR6F	PUR11M	-0.259	EUR11F	PUR10M	0.595174
EUR6F	PUR11F	-0.083	EUR11F	PUR10F	0.586158
EUR6F	PUR12P	-0.157	EUR11F	PUR11P	0.57911
EUR6F	PUR12M	-0.128	EUR11F	PUR11M	0.591125
EUR6F	PUR12F	-0.183	EUR11F	PUR11F	0.576347
EUR6F	PUR13P	-0.121	EUR11F	PUR12P	0.615688
EUR6F	PUR13M	-0.131	EUR11F	PUR12M	0.602744
EUR6F	PUR13F	-0.161	EUR11F	PUR12F	0.605879
EUR6F	PUR14P	-0.045	EUR11F	PUR13P	0.601962
EUR6F	PUR14M	-0.09	EUR11F	PUR13M	0.573992
EUR6F	PUR14F	-0.047	EUR11F	PUR13F	0.611842
EUR6F	EUR14P	-0.038	EUR11F	PUR14P	0.590172
EUR6F	EUR14M	-0.181	EUR11F	PUR14M	0.600384
EUR6F	EUR14F	-0.074	EUR11F	PUR14F	0.576064
EUR6F	PUR15P	-0.162	EUR11F	EUR14P	0.585592
EUR6F	PUR15M	-0.051	EUR11F	EUR14M	0.599374
EUR6F	PUR15F	-0.121	EUR11F	EUR14F	0.616276
EUR6F	EUR9P	-0.209	EUR11F	PUR15P	0.597602
EUR6F	EUR9M	-0.043	EUR11F	PUR15M	0.598004
EUR6F	EUR9F	-0.213	EUR11F	PUR15F	0.593091
EUR6F	EUR10P	-0.218	EUR11F	EUR9P	0.606041
EUR6F	EUR10M	-0.054	EUR11F	EUR9M	0.633002
EUR6F	EUR10F	-0.128	EUR11F	EUR9F	0.58905
EUR6F	EUR5P	-0.207	EUR11F	EUR10P	0.620263
EUR6F	EUR5M	-0.069	EUR11F	EUR10M	0.587453
EUR6F	EUR5F	-0.085	EUR11F	EUR10F	0.618832
EUR11P	EUR11M	0.488	EUR11F	EUR5P	0.582555
EUR11P	EUR11F	0.438	EUR11F	EUR5M	0.60226
EUR11P	EUR12P	-0.186	EUR11F	EUR5F	0.599019
EUR11P	EUR12M	-0.071	EUR12P	AFR1P	0.580058
EUR11P	EUR12F	-0.098	EUR12P	AFR1M	0.586041
EUR11P	EUR8P	-0.056	EUR12P	AFR1F	0.59597
EUR11P	EUR8M	-0.04	EUR12P	EUR12M	0.759971
EUR11P	EUR8F	-0.165	EUR12P	EUR12F	0.769116
EUR11P	EUR4P	-0.067	EUR12P	EUR8P	0.596729
EUR11P	EUR4M	-0.115	EUR12P	EUR8M	0.599701
EUR11P	EUR4F	-0.21	EUR12P	EUR8F	0.581953
EUR11P	EUR3P	-0.145	EUR12P	EUR4P	0.593739
EUR11P	EUR3M	-0.175	EUR12P	EUR4M	0.583245
EUR11P	EUR3F	-0.202	EUR12P	EUR4F	0.602965
EUR11P	EUR1P	-0.035	EUR12P	EUR3P	0.600767
EUR11P	EUR1M	-0.081	EUR12P	EUR3M	0.599041
EUR11P	EUR1F	-0.153	EUR12P	EUR3F	0.58568
EUR11P	PUR1P	-0.153	EUR12P	EUR1P	0.591547
EUR11P	PUR1M	-0.046	EUR12P	EUR1M	0.57284
EUR11P	PUR1F	-0.01	EUR12P	EUR1F	0.595221
EUR11P	PUR2P	-0.1	EUR12P	PUR1P	0.579302
EUR11P	PUR2M	-0.075	EUR12P	PUR1M	0.578722
EUR11P	PUR2F	-0.103	EUR12P	PUR1F	0.581037
EUR11P	PUR3P	-0.143	EUR12P	PUR2P	0.584273
EUR11P	PUR3M	-0.205	EUR12P	PUR2M	0.589413
EUR11P	PUR3F	-0.188	EUR12P	PUR2F	0.584006
EUR11P	PUR4P	-0.217	EUR12P	PUR3P	0.574343
EUR11P	PUR4M	-0.136	EUR12P	PUR3M	0.597497
EUR11P	PUR4F	-0.347	EUR12P	PUR3F	0.574367
EUR11P	PUR5P	-0.18	EUR12P	PUR4P	0.58694
EUR11P	PUR5M	-0.078	EUR12P	PUR4M	0.592594
EUR11P	PUR5F	-0.109	EUR12P	PUR4F	0.586465
EUR11P	PUR6P	-0.281	EUR12P	PUR5P	0.576702
EUR11P	PUR6M	-0.14	EUR12P	PUR5M	0.579154
EUR11P	PUR6F	-0.231	EUR12P	PUR5F	0.592141
EUR11P	EUR15P	-0.185	EUR12P	PUR6P	0.574202
EUR11P	EUR15M	-0.125	EUR12P	PUR6M	0.585631
EUR11P	EUR15F	-0.223	EUR12P	PUR6F	0.583144
EUR11P	EUR2P	-0.196	EUR12P	EUR15P	0.588131
EUR11P	EUR2M	-0.173	EUR12P	EUR15M	0.589316
EUR11P	EUR2F	-0.139	EUR12P	EUR15F	0.581281
EUR11P	PUR7P	-0.083	EUR12P	EUR2P	0.614576
EUR11P	PUR7M	-0.081	EUR12P	EUR2M	0.592167
EUR11P	PUR7F	-0.149	EUR12P	EUR2F	0.601094
EUR11P	PUR8P	-0.111	EUR12P	PUR7P	0.586017
EUR11P	PUR8M	-0.139	EUR12P	PUR7M	0.573903
EUR11P	PUR8F	-0.091	EUR12P	PUR7F	0.590928
EUR11P	PUR9P	-0.136	EUR12P	PUR8P	0.592013
EUR11P	PUR9M	-0.211	EUR12P	PUR8M	0.585107
EUR11P	PUR9F	-0.119	EUR12P	PUR8F	0.585131
EUR11P	PUR10P	-0.154	EUR12P	PUR9P	0.587088
EUR11P	PUR10M	-0.23	EUR12P	PUR9M	0.584804
EUR11P	PUR10F	-0.104	EUR12P	PUR9F	0.580046
EUR11P	PUR11P	-0.195	EUR12P	PUR10P	0.589548
EUR11P	PUR11M	-0.193	EUR12P	PUR10M	0.594572
EUR11P	PUR11F	-0.071	EUR12P	PUR10F	0.600985
EUR11P	PUR12P	-0.076	EUR12P	PUR11P	0.59455
EUR11P	PUR12M	-0.142	EUR12P	PUR11M	0.582473
EUR11P	PUR12F	-0.145	EUR12P	PUR11F	0.594736
EUR11P	PUR13P	-0.14	EUR12P	PUR12P	0.588531
EUR11P	PUR13M	-0.174	EUR12P	PUR12M	0.599754
EUR11P	PUR13F	-0.157	EUR12P	PUR12F	0.583774
EUR11P	PUR14P	-0.108	EUR12P	PUR13P	0.594628
EUR11P	PUR14M	-0.172	EUR12P	PUR13M	0.591527
EUR11P	PUR14F	-0.089	EUR12P	PUR13F	0.579754
EUR11P	EUR14P	-0.051	EUR12P	PUR14P	0.565065
EUR11P	EUR14M	-0.154	EUR12P	PUR14M	0.570668
EUR11P	EUR14F	-0.069	EUR12P	PUR14F	0.588096
EUR11P	PUR15P	-0.161	EUR12P	EUR14P	0.583981
EUR11P	PUR15M	-0.107	EUR12P	EUR14M	0.586055
EUR11P	PUR15F	-0.079	EUR12P	EUR14F	0.586563
EUR11P	EUR9P	-0.104	EUR12P	PUR15P	0.593694
EUR11P	EUR9M	-0.109	EUR12P	PUR15M	0.574437
EUR11P	EUR9F	-0.126	EUR12P	PUR15F	0.594493
EUR11P	EUR10P	-0.137	EUR12P	EUR9P	0.605726
EUR11P	EUR10M	0.005	EUR12P	EUR9M	0.588376
EUR11P	EUR10F	-0.234	EUR12P	EUR9F	0.590096
EUR11P	EUR5P	-0.234	EUR12P	EUR10P	0.580984
EUR11P	EUR5M	-0.01	EUR12P	EUR10M	0.566339
EUR11P	EUR5F	-0.086	EUR12P	EUR10F	0.590606
EUR11M	EUR11F	0.011	EUR12P	EUR5P	0.578576
EUR11M	EUR12P	0.033	EUR12P	EUR5M	0.589826
EUR11M	EUR12M	0.094	EUR12P	EUR5F	0.600287
EUR11M	EUR12F	0.011	EUR12M	AFR1P	0.590619
EUR11M	EUR8P	0.075	EUR12M	AFR1M	0.597551
EUR11M	EUR8M	0.063	EUR12M	AFR1F	0.582916
EUR11M	EUR8F	-0.094	EUR12M	EUR12F	0.545271
EUR11M	EUR4P	0.029	EUR12M	EUR8P	0.601275
EUR11M	EUR4M	-0.031	EUR12M	EUR8M	0.597211
EUR11M	EUR4F	0	EUR12M	EUR8F	0.586663
EUR11M	EUR3P	0.047	EUR12M	EUR4P	0.59052
EUR11M	EUR3M	-0.027	EUR12M	EUR4M	0.580814
EUR11M	EUR3F	-0.059	EUR12M	EUR4F	0.616913
EUR11M	EUR1P	-0.011	EUR12M	EUR3P	0.605229
EUR11M	EUR1M	-0.044	EUR12M	EUR3M	0.604414
EUR11M	EUR1F	-0.043	EUR12M	EUR3F	0.606134
EUR11M	PUR1P	-0.095	EUR12M	EUR1P	0.622235
EUR11M	PUR1M	0.03	EUR12M	EUR1M	0.580927
EUR11M	PUR1F	0.029	EUR12M	EUR1F	0.590597
EUR11M	PUR2P	0.043	EUR12M	PUR1P	0.578781
EUR11M	PUR2M	0.051	EUR12M	PUR1M	0.586675
EUR11M	PUR2F	0.005	EUR12M	PUR1F	0.586316
EUR11M	PUR3P	-0.054	EUR12M	PUR2P	0.588996
EUR11M	PUR3M	-0.037	EUR12M	PUR2M	0.591824
EUR11M	PUR3F	-0.036	EUR12M	PUR2F	0.608449
EUR11M	PUR4P	-0.042	EUR12M	PUR3P	0.588142
EUR11M	PUR4M	0	EUR12M	PUR3M	0.619312
EUR11M	PUR4F	-0.229	EUR12M	PUR3F	0.579406
EUR11M	PUR5P	0.019	EUR12M	PUR4P	0.597934
EUR11M	PUR5M	0.082	EUR12M	PUR4M	0.575746
EUR11M	PUR5F	0.026	EUR12M	PUR4F	0.615129
EUR11M	PUR6P	-0.064	EUR12M	PUR5P	0.6079
EUR11M	PUR6M	0.052	EUR12M	PUR5M	0.588158
EUR11M	PUR6F	-0.026	EUR12M	PUR5F	0.61617
EUR11M	EUR15P	-0.069	EUR12M	PUR6P	0.604121
EUR11M	EUR15M	0.022	EUR12M	PUR6M	0.614616
EUR11M	EUR15F	-0.063	EUR12M	PUR6F	0.580657
EUR11M	EUR2P	-0.041	EUR12M	EUR15P	0.59539
EUR11M	EUR2M	0.011	EUR12M	EUR15M	0.61141
EUR11M	EUR2F	-0.05	EUR12M	EUR15F	0.590242
EUR11M	PUR7P	0.06	EUR12M	EUR2P	0.630607
EUR11M	PUR7M	0.123	EUR12M	EUR2M	0.588996
EUR11M	PUR7F	-0.021	EUR12M	EUR2F	0.627699
EUR11M	PUR8P	0.059	EUR12M	PUR7P	0.588004
EUR11M	PUR8M	0.042	EUR12M	PUR7M	0.583313
EUR11M	PUR8F	0.067	EUR12M	PUR7F	0.59277
EUR11M	PUR9P	0	EUR12M	PUR8P	0.587825
EUR11M	PUR9M	0.027	EUR12M	PUR8M	0.577471
EUR11M	PUR9F	0.059	EUR12M	PUR8F	0.611157
EUR11M	PUR10P	-0.04	EUR12M	PUR9P	0.586026
EUR11M	PUR10M	-0.029	EUR12M	PUR9M	0.578624
EUR11M	PUR10F	0.034	EUR12M	PUR9F	0.56041
EUR11M	PUR11P	-0.068	EUR12M	PUR10P	0.604476
EUR11M	PUR11M	-0.05	EUR12M	PUR10M	0.599169
EUR11M	PUR11F	0.071	EUR12M	PUR10F	0.595142
EUR11M	PUR12P	-0.016	EUR12M	PUR11P	0.575731
EUR11M	PUR12M	-0.005	EUR12M	PUR11M	0.581643
EUR11M	PUR12F	-0.151	EUR12M	PUR11F	0.574937
EUR11M	PUR13P	0.022	EUR12M	PUR12P	0.597864
EUR11M	PUR13M	0	EUR12M	PUR12M	0.603808
EUR11M	PUR13F	-0.049	EUR12M	PUR12F	0.587556
EUR11M	PUR14P	0.043	EUR12M	PUR13P	0.585433
EUR11M	PUR14M	-0.01	EUR12M	PUR13M	0.56949
EUR11M	PUR14F	0.02	EUR12M	PUR13F	0.607843
EUR11M	EUR14P	0.086	EUR12M	PUR14P	0.575939
EUR11M	EUR14M	-0.021	EUR12M	PUR14M	0.592497
EUR11M	EUR14F	-0.006	EUR12M	PUR14F	0.585538
EUR11M	PUR15P	-0.027	EUR12M	EUR14P	0.568936
EUR11M	PUR15M	0.015	EUR12M	EUR14M	0.574269
EUR11M	PUR15F	0.059	EUR12M	EUR14F	0.602513
EUR11M	EUR9P	0.027	EUR12M	PUR15P	0.58661
EUR11M	EUR9M	0.048	EUR12M	PUR15M	0.588196
EUR11M	EUR9F	-0.034	EUR12M	PUR15F	0.584096
EUR11M	EUR10P	-0.006	EUR12M	EUR9P	0.604967
EUR11M	EUR10M	0.15	EUR12M	EUR9M	0.610168
EUR11M	EUR10F	-0.087	EUR12M	EUR9F	0.582417
EUR11M	EUR5P	-0.08	EUR12M	EUR10P	0.595081
EUR11M	EUR5M	0.101	EUR12M	EUR10M	0.561587
EUR11M	EUR5F	0.023	EUR12M	EUR10F	0.595451
EUR11F	EUR12P	-0.218	EUR12M	EUR5P	0.584648
EUR11F	EUR12M	-0.033	EUR12M	EUR5M	0.622736
EUR11F	EUR12F	-0.12	EUR12M	EUR5F	0.587536
EUR11F	EUR8P	-0.085	EUR12F	AFR1P	0.571626
EUR11F	EUR8M	0.006	EUR12F	AFR1M	0.571182
EUR11F	EUR8F	-0.14	EUR12F	AFR1F	0.574122
EUR11F	EUR4P	-0.086	EUR12F	EUR8P	0.588077
EUR11F	EUR4M	-0.174	EUR12F	EUR8M	0.594693
EUR11F	EUR4F	-0.126	EUR12F	EUR8F	0.586439
EUR11F	EUR3P	-0.092	EUR12F	EUR4P	0.580508
EUR11F	EUR3M	-0.152	EUR12F	EUR4M	0.586527
EUR11F	EUR3F	-0.199	EUR12F	EUR4F	0.593654
EUR11F	EUR1P	-0.052	EUR12F	EUR3P	0.594383
EUR11F	EUR1M	-0.07	EUR12F	EUR3M	0.602056
EUR11F	EUR1F	-0.093	EUR12F	EUR3F	0.59096
EUR11F	PUR1P	-0.045	EUR12F	EUR1P	0.588471
EUR11F	PUR1M	-0.104	EUR12F	EUR1M	0.584385
EUR11F	PUR1F	0.055	EUR12F	EUR1F	0.590923
EUR11F	PUR2P	-0.006	EUR12F	PUR1P	0.577194
EUR11F	PUR2M	-0.064	EUR12F	PUR1M	0.597045
EUR11F	PUR2F	-0.022	EUR12F	PUR1F	0.57607
EUR11F	PUR3P	-0.045	EUR12F	PUR2P	0.596773
EUR11F	PUR3M	-0.067	EUR12F	PUR2M	0.583818
EUR11F	PUR3F	-0.121	EUR12F	PUR2F	0.58694
EUR11F	PUR4P	-0.122	EUR12F	PUR3P	0.580505
EUR11F	PUR4M	-0.114	EUR12F	PUR3M	0.583199
EUR11F	PUR4F	-0.385	EUR12F	PUR3F	0.577737
EUR11F	PUR5P	-0.129	EUR12F	PUR4P	0.582616
EUR11F	PUR5M	-0.056	EUR12F	PUR4M	0.589595
EUR11F	PUR5F	-0.096	EUR12F	PUR4F	0.57441
EUR11F	PUR6P	-0.142	EUR12F	PUR5P	0.564581
EUR11F	PUR6M	-0.103	EUR12F	PUR5M	0.579618
EUR11F	PUR6F	-0.138	EUR12F	PUR5F	0.577753
EUR11F	EUR15P	-0.149	EUR12F	PUR6P	0.579509
EUR11F	EUR15M	-0.051	EUR12F	PUR6M	0.582526
EUR11F	EUR15F	-0.193	EUR12F	PUR6F	0.587271
EUR11F	EUR2P	-0.133	EUR12F	EUR15P	0.597688
EUR11F	EUR2M	-0.122	EUR12F	EUR15M	0.589717
EUR11F	EUR2F	-0.096	EUR12F	EUR15F	0.595164
EUR11F	PUR7P	-0.057	EUR12F	EUR2P	0.586949
EUR11F	PUR7M	-0.031	EUR12F	EUR2M	0.58177
EUR11F	PUR7F	-0.13	EUR12F	EUR2F	0.588028
EUR11F	PUR8P	-0.03	EUR12F	PUR7P	0.590266
EUR11F	PUR8M	-0.053	EUR12F	PUR7M	0.592833
EUR11F	PUR8F	-0.103	EUR12F	PUR7F	0.585456
EUR11F	PUR9P	-0.077	EUR12F	PUR8P	0.588865
EUR11F	PUR9M	-0.095	EUR12F	PUR8M	0.593057
EUR11F	PUR9F	-0.106	EUR12F	PUR8F	0.577249
EUR11F	PUR10P	-0.089	EUR12F	PUR9P	0.582157
EUR11F	PUR10M	-0.127	EUR12F	PUR9M	0.588502
EUR11F	PUR10F	-0.124	EUR12F	PUR9F	0.580384
EUR11F	PUR11P	-0.161	EUR12F	PUR10P	0.581981
EUR11F	PUR11M	-0.104	EUR12F	PUR10M	0.579609
EUR11F	PUR11F	-0.057	EUR12F	PUR10F	0.591547
EUR11F	PUR12P	-0.099	EUR12F	PUR11P	0.595257
EUR11F	PUR12M	-0.097	EUR12F	PUR11M	0.583756
EUR11F	PUR12F	-0.209	EUR12F	PUR11F	0.599299
EUR11F	PUR13P	-0.129	EUR12F	PUR12P	0.587941
EUR11F	PUR13M	-0.155	EUR12F	PUR12M	0.588567
EUR11F	PUR13F	-0.174	EUR12F	PUR12F	0.5836
EUR11F	PUR14P	-0.073	EUR12F	PUR13P	0.597153
EUR11F	PUR14M	-0.179	EUR12F	PUR13M	0.585323
EUR11F	PUR14F	-0.074	EUR12F	PUR13F	0.590059
EUR11F	EUR14P	-0.017	EUR12F	PUR14P	0.575315
EUR11F	EUR14M	-0.05	EUR12F	PUR14M	0.571264
EUR11F	EUR14F	-0.065	EUR12F	PUR14F	0.590084
EUR11F	PUR15P	-0.186	EUR12F	EUR14P	0.600889
EUR11F	PUR15M	-0.082	EUR12F	EUR14M	0.592715
EUR11F	PUR15F	-0.023	EUR12F	EUR14F	0.594604
EUR11F	EUR9P	-0.055	EUR12F	PUR15P	0.602813
EUR11F	EUR9M	-0.071	EUR12F	PUR15M	0.579343
EUR11F	EUR9F	-0.088	EUR12F	PUR15F	0.599786
EUR11F	EUR10P	-0.085	EUR12F	EUR9P	0.608705
EUR11F	EUR10M	0.119	EUR12F	EUR9M	0.595205
EUR11F	EUR10F	-0.134	EUR12F	EUR9F	0.600657
EUR11F	EUR5P	-0.071	EUR12F	EUR10P	0.589252
EUR11F	EUR5M	0	EUR12F	EUR10M	0.580671
EUR11F	EUR5F	-0.037	EUR12F	EUR10F	0.596067
EUR12P	EUR12M	0.499	EUR12F	EUR5P	0.583247
EUR12P	EUR12F	0.363	EUR12F	EUR5M	0.576632
EUR12P	EUR8P	-0.039	EUR12F	EUR5F	0.605893
EUR12P	EUR8M	-0.041	EUR8P	AFR1P	0.580123
EUR12P	EUR8F	-0.121	EUR8P	AFR1M	0.580903
EUR12P	EUR4P	-0.15	EUR8P	AFR1F	0.567859
EUR12P	EUR4M	-0.135	EUR8P	EUR8M	0.775309
EUR12P	EUR4F	-0.066	EUR8P	EUR8F	0.786148
EUR12P	EUR3P	-0.092	EUR8P	EUR4P	0.614563
EUR12P	EUR3M	-0.096	EUR8P	EUR4M	0.612543
EUR12P	EUR3F	-0.148	EUR8P	EUR4F	0.626086
EUR12P	EUR1P	-0.129	EUR8P	EUR3P	0.611245
EUR12P	EUR1M	-0.118	EUR8P	EUR3M	0.610948
EUR12P	EUR1F	-0.079	EUR8P	EUR3F	0.616787
EUR12P	PUR1P	-0.117	EUR8P	EUR1P	0.621629
EUR12P	PUR1M	-0.147	EUR8P	EUR1M	0.60751
EUR12P	PUR1F	-0.04	EUR8P	EUR1F	0.595973
EUR12P	PUR2P	-0.049	EUR8P	PUR1P	0.587328
EUR12P	PUR2M	-0.005	EUR8P	PUR1M	0.587886
EUR12P	PUR2F	-0.111	EUR8P	PUR1F	0.59757
EUR12P	PUR3P	-0.07	EUR8P	PUR2P	0.592876
EUR12P	PUR3M	-0.033	EUR8P	PUR2M	0.600758
EUR12P	PUR3F	-0.23	EUR8P	PUR2F	0.615696
EUR12P	PUR4P	-0.092	EUR8P	PUR3P	0.581779
EUR12P	PUR4M	-0.103	EUR8P	PUR3M	0.605702
EUR12P	PUR4F	-0.293	EUR8P	PUR3F	0.582514
EUR12P	PUR5P	-0.166	EUR8P	PUR4P	0.586011
EUR12P	PUR5M	0.028	EUR8P	PUR4M	0.575187
EUR12P	PUR5F	-0.146	EUR8P	PUR4F	0.592575
EUR12P	PUR6P	-0.203	EUR8P	PUR5P	0.596174
EUR12P	PUR6M	-0.153	EUR8P	PUR5M	0.57247
EUR12P	PUR6F	-0.107	EUR8P	PUR5F	0.609103
EUR12P	EUR15P	-0.152	EUR8P	PUR6P	0.606585
EUR12P	EUR15M	-0.051	EUR8P	PUR6M	0.597203
EUR12P	EUR15F	-0.158	EUR8P	PUR6F	0.609412
EUR12P	EUR2P	-0.06	EUR8P	EUR15P	0.588433
EUR12P	EUR2M	-0.096	EUR8P	EUR15M	0.591184
EUR12P	EUR2F	-0.05	EUR8P	EUR15F	0.58104
EUR12P	PUR7P	-0.197	EUR8P	EUR2P	0.63345
EUR12P	PUR7M	-0.143	EUR8P	EUR2M	0.60442
EUR12P	PUR7F	-0.162	EUR8P	EUR2F	0.640254
EUR12P	PUR8P	-0.078	EUR8P	PUR7P	0.588976
EUR12P	PUR8M	-0.057	EUR8P	PUR7M	0.596529
EUR12P	PUR8F	-0.105	EUR8P	PUR7F	0.599184
EUR12P	PUR9P	-0.087	EUR8P	PUR8P	0.570749
EUR12P	PUR9M	-0.112	EUR8P	PUR8M	0.573909
EUR12P	PUR9F	-0.078	EUR8P	PUR8F	0.621414
EUR12P	PUR10P	-0.039	EUR8P	PUR9P	0.59905
EUR12P	PUR10M	-0.075	EUR8P	PUR9M	0.60027
EUR12P	PUR10F	-0.147	EUR8P	PUR9F	0.576827
EUR12P	PUR11P	-0.129	EUR8P	PUR10P	0.599941
EUR12P	PUR11M	-0.097	EUR8P	PUR10M	0.616422
EUR12P	PUR11F	-0.026	EUR8P	PUR10F	0.584267
EUR12P	PUR12P	-0.075	EUR8P	PUR11P	0.582638
EUR12P	PUR12M	-0.161	EUR8P	PUR11M	0.580595
EUR12P	PUR12F	-0.092	EUR8P	PUR11F	0.598469
EUR12P	PUR13P	-0.059	EUR8P	PUR12P	0.6149
EUR12P	PUR13M	-0.22	EUR8P	PUR12M	0.604602
EUR12P	PUR13F	-0.179	EUR8P	PUR12F	0.594701
EUR12P	PUR14P	-0.191	EUR8P	PUR13P	0.609386
EUR12P	PUR14M	-0.06	EUR8P	PUR13M	0.581249
EUR12P	PUR14F	-0.172	EUR8P	PUR13F	0.610661
EUR12P	EUR14P	-0.022	EUR8P	PUR14P	0.581641
EUR12P	EUR14M	-0.095	EUR8P	PUR14M	0.616732
EUR12P	EUR14F	-0.17	EUR8P	PUR14F	0.577213
EUR12P	PUR15P	-0.177	EUR8P	EUR14P	0.583577
EUR12P	PUR15M	-0.072	EUR8P	EUR14M	0.589829
EUR12P	PUR15F	-0.148	EUR8P	EUR14F	0.61673
EUR12P	EUR9P	-0.097	EUR8P	PUR15P	0.58442
EUR12P	EUR9M	-0.118	EUR8P	PUR15M	0.582484
EUR12P	EUR9F	-0.143	EUR8P	PUR15F	0.595361
EUR12P	EUR10P	-0.092	EUR8P	EUR9P	0.611885
EUR12P	EUR10M	0.074	EUR8P	EUR9M	0.623934
EUR12P	EUR10F	-0.181	EUR8P	EUR9F	0.596908
EUR12P	EUR5P	-0.181	EUR8P	EUR10P	0.62941
EUR12P	EUR5M	-0.026	EUR8P	EUR10M	0.59841
EUR12P	EUR5F	-0.047	EUR8P	EUR10F	0.617536
EUR12M	EUR12F	-0.038	EUR8P	EUR5P	0.589514
EUR12M	EUR8P	-0.072	EUR8P	EUR5M	0.619514
EUR12M	EUR8M	-0.048	EUR8P	EUR5F	0.593593
EUR12M	EUR8F	-0.162	EUR8M	AFR1P	0.574884
EUR12M	EUR4P	-0.022	EUR8M	AFR1M	0.568887
EUR12M	EUR4M	-0.107	EUR8M	AFR1F	0.578644
EUR12M	EUR4F	-0.058	EUR8M	EUR8F	0.567943
EUR12M	EUR3P	-0.08	EUR8M	EUR4P	0.60333
EUR12M	EUR3M	-0.027	EUR8M	EUR4M	0.595857
EUR12M	EUR3F	-0.214	EUR8M	EUR4F	0.599032
EUR12M	EUR1P	-0.054	EUR8M	EUR3P	0.617485
EUR12M	EUR1M	-0.021	EUR8M	EUR3M	0.610309
EUR12M	EUR1F	-0.046	EUR8M	EUR3F	0.608087
EUR12M	PUR1P	-0.067	EUR8M	EUR1P	0.610084
EUR12M	PUR1M	-0.092	EUR8M	EUR1M	0.60827
EUR12M	PUR1F	-0.029	EUR8M	EUR1F	0.598949
EUR12M	PUR2P	-0.078	EUR8M	PUR1P	0.581323
EUR12M	PUR2M	-0.05	EUR8M	PUR1M	0.591578
EUR12M	PUR2F	-0.02	EUR8M	PUR1F	0.578332
EUR12M	PUR3P	-0.043	EUR8M	PUR2P	0.597676
EUR12M	PUR3M	-0.023	EUR8M	PUR2M	0.584207
EUR12M	PUR3F	-0.18	EUR8M	PUR2F	0.601366
EUR12M	PUR4P	-0.078	EUR8M	PUR3P	0.599085
EUR12M	PUR4M	-0.115	EUR8M	PUR3M	0.583415
EUR12M	PUR4F	-0.241	EUR8M	PUR3F	0.593699
EUR12M	PUR5P	-0.111	EUR8M	PUR4P	0.584733
EUR12M	PUR5M	-0.032	EUR8M	PUR4M	0.592001
EUR12M	PUR5F	-0.052	EUR8M	PUR4F	0.566917
EUR12M	PUR6P	-0.168	EUR8M	PUR5P	0.585697
EUR12M	PUR6M	-0.056	EUR8M	PUR5M	0.598105
EUR12M	PUR6F	-0.118	EUR8M	PUR5F	0.586106
EUR12M	EUR15P	-0.157	EUR8M	PUR6P	0.583967
EUR12M	EUR15M	-0.032	EUR8M	PUR6M	0.574281
EUR12M	EUR15F	-0.164	EUR8M	PUR6F	0.603807
EUR12M	EUR2P	-0.116	EUR8M	EUR15P	0.587608
EUR12M	EUR2M	-0.144	EUR8M	EUR15M	0.587504
EUR12M	EUR2F	-0.134	EUR8M	EUR15F	0.586317
EUR12M	PUR7P	-0.086	EUR8M	EUR2P	0.587234
EUR12M	PUR7M	-0.096	EUR8M	EUR2M	0.583536
EUR12M	PUR7F	-0.097	EUR8M	EUR2F	0.608384
EUR12M	PUR8P	-0.115	EUR8M	PUR7P	0.602113
EUR12M	PUR8M	-0.073	EUR8M	PUR7M	0.599041
EUR12M	PUR8F	-0.164	EUR8M	PUR7F	0.593266
EUR12M	PUR9P	-0.143	EUR8M	PUR8P	0.574878
EUR12M	PUR9M	-0.065	EUR8M	PUR8M	0.556808
EUR12M	PUR9F	-0.112	EUR8M	PUR8F	0.614086
EUR12M	PUR10P	-0.005	EUR8M	PUR9P	0.593222
EUR12M	PUR10M	-0.084	EUR8M	PUR9M	0.59282
EUR12M	PUR10F	-0.131	EUR8M	PUR9F	0.576108
EUR12M	PUR11P	-0.152	EUR8M	PUR10P	0.584848
EUR12M	PUR11M	-0.134	EUR8M	PUR10M	0.596629
EUR12M	PUR11F	-0.054	EUR8M	PUR10F	0.576603
EUR12M	PUR12P	-0.055	EUR8M	PUR11P	0.585518
EUR12M	PUR12M	-0.09	EUR8M	PUR11M	0.57751
EUR12M	PUR12F	-0.181	EUR8M	PUR11F	0.603121
EUR12M	PUR13P	-0.118	EUR8M	PUR12P	0.597626
EUR12M	PUR13M	-0.114	EUR8M	PUR12M	0.590753
EUR12M	PUR13F	-0.183	EUR8M	PUR12F	0.599734
EUR12M	PUR14P	-0.105	EUR8M	PUR13P	0.601289
EUR12M	PUR14M	-0.158	EUR8M	PUR13M	0.588712
EUR12M	PUR14F	-0.083	EUR8M	PUR13F	0.600737
EUR12M	EUR14P	-0.022	EUR8M	PUR14P	0.582597
EUR12M	EUR14M	-0.062	EUR8M	PUR14M	0.590662
EUR12M	EUR14F	-0.131	EUR8M	PUR14F	0.582137
EUR12M	PUR15P	-0.084	EUR8M	EUR14P	0.589046
EUR12M	PUR15M	-0.014	EUR8M	EUR14M	0.587218
EUR12M	PUR15F	-0.097	EUR8M	EUR14F	0.598389
EUR12M	EUR9P	-0.046	EUR8M	PUR15P	0.58758
EUR12M	EUR9M	-0.136	EUR8M	PUR15M	0.577217
EUR12M	EUR9F	-0.07	EUR8M	PUR15F	0.598064
EUR12M	EUR10P	0.021	EUR8M	EUR9P	0.596032
EUR12M	EUR10M	0.128	EUR8M	EUR9M	0.603322
EUR12M	EUR10F	-0.083	EUR8M	EUR9F	0.601661
EUR12M	EUR5P	-0.083	EUR8M	EUR10P	0.604208
EUR12M	EUR5M	0.067	EUR8M	EUR10M	0.588493
EUR12M	EUR5F	0.038	EUR8M	EUR10F	0.604491
EUR12F	EUR8P	0.039	EUR8M	EUR5P	0.593143
EUR12F	EUR8M	0.036	EUR8M	EUR5M	0.591464
EUR12F	EUR8F	-0.03	EUR8M	EUR5F	0.598327
EUR12F	EUR4P	-0.071	EUR8F	AFR1P	0.57688
EUR12F	EUR4M	-0.025	EUR8F	AFR1M	0.586583
EUR12F	EUR4F	-0.031	EUR8F	AFR1F	0.568753
EUR12F	EUR3P	0	EUR8F	EUR4P	0.590957
EUR12F	EUR3M	-0.006	EUR8F	EUR4M	0.589688
EUR12F	EUR3F	-0.158	EUR8F	EUR4F	0.60722
EUR12F	EUR1P	-0.153	EUR8F	EUR3P	0.593051
EUR12F	EUR1M	-0.116	EUR8F	EUR3M	0.607332
EUR12F	EUR1F	-0.079	EUR8F	EUR3F	0.606366
EUR12F	PUR1P	-0.13	EUR8F	EUR1P	0.613839
EUR12F	PUR1M	-0.03	EUR8F	EUR1M	0.596626
EUR12F	PUR1F	-0.005	EUR8F	EUR1F	0.596126
EUR12F	PUR2P	-0.038	EUR8F	PUR1P	0.582056
EUR12F	PUR2M	-0.042	EUR8F	PUR1M	0.581026
EUR12F	PUR2F	-0.089	EUR8F	PUR1F	0.598341
EUR12F	PUR3P	-0.087	EUR8F	PUR2P	0.586332
EUR12F	PUR3M	-0.056	EUR8F	PUR2M	0.591212
EUR12F	PUR3F	-0.153	EUR8F	PUR2F	0.604316
EUR12F	PUR4P	-0.133	EUR8F	PUR3P	0.575822
EUR12F	PUR4M	-0.159	EUR8F	PUR3M	0.587779
EUR12F	PUR4F	-0.346	EUR8F	PUR3F	0.582418
EUR12F	PUR5P	-0.103	EUR8F	PUR4P	0.578877
EUR12F	PUR5M	0.054	EUR8F	PUR4M	0.588555
EUR12F	PUR5F	-0.07	EUR8F	PUR4F	0.587762
EUR12F	PUR6P	-0.193	EUR8F	PUR5P	0.594551
EUR12F	PUR6M	-0.115	EUR8F	PUR5M	0.586094
EUR12F	PUR6F	-0.092	EUR8F	PUR5F	0.597959
EUR12F	EUR15P	-0.094	EUR8F	PUR6P	0.600661
EUR12F	EUR15M	-0.064	EUR8F	PUR6M	0.583407
EUR12F	EUR15F	-0.183	EUR8F	PUR6F	0.591975
EUR12F	EUR2P	-0.031	EUR8F	EUR15P	0.576005
EUR12F	EUR2M	-0.017	EUR8F	EUR15M	0.579425
EUR12F	EUR2F	0.006	EUR8F	EUR15F	0.574037
EUR12F	PUR7P	-0.128	EUR8F	EUR2P	0.615107
EUR12F	PUR7M	-0.116	EUR8F	EUR2M	0.598256
EUR12F	PUR7F	-0.121	EUR8F	EUR2F	0.608154
EUR12F	PUR8P	-0.049	EUR8F	PUR7P	0.581385
EUR12F	PUR8M	0.014	EUR8F	PUR7M	0.574127
EUR12F	PUR8F	-0.039	EUR8F	PUR7F	0.588157
EUR12F	PUR9P	-0.077	EUR8F	PUR8P	0.577301
EUR12F	PUR9M	-0.101	EUR8F	PUR8M	0.568834
EUR12F	PUR9F	-0.005	EUR8F	PUR8F	0.607453
EUR12F	PUR10P	-0.006	EUR8F	PUR9P	0.592384
EUR12F	PUR10M	-0.024	EUR8F	PUR9M	0.594002
EUR12F	PUR10F	-0.029	EUR8F	PUR9F	0.582411
EUR12F	PUR11P	-0.146	EUR8F	PUR10P	0.621641
EUR12F	PUR11M	-0.062	EUR8F	PUR10M	0.619745
EUR12F	PUR11F	0.005	EUR8F	PUR10F	0.58859
EUR12F	PUR12P	-0.06	EUR8F	PUR11P	0.57524
EUR12F	PUR12M	-0.022	EUR8F	PUR11M	0.584766
EUR12F	PUR12F	-0.069	EUR8F	PUR11F	0.580085
EUR12F	PUR13P	-0.006	EUR8F	PUR12P	0.603415
EUR12F	PUR13M	-0.091	EUR8F	PUR12M	0.592507
EUR12F	PUR13F	-0.046	EUR8F	PUR12F	0.583138
EUR12F	PUR14P	-0.102	EUR8F	PUR13P	0.588289
EUR12F	PUR14M	-0.123	EUR8F	PUR13M	0.582657
EUR12F	PUR14F	-0.11	EUR8F	PUR13F	0.59498
EUR12F	EUR14P	-0.05	EUR8F	PUR14P	0.579931
EUR12F	EUR14M	-0.022	EUR8F	PUR14M	0.593549
EUR12F	EUR14F	-0.102	EUR8F	PUR14F	0.573338
EUR12F	PUR15P	-0.063	EUR8F	EUR14P	0.59798
EUR12F	PUR15M	-0.075	EUR8F	EUR14M	0.599891
EUR12F	PUR15F	-0.074	EUR8F	EUR14F	0.604598
EUR12F	EUR9P	0	EUR8F	PUR15P	0.590331
EUR12F	EUR9M	-0.022	EUR8F	PUR15M	0.58555
EUR12F	EUR9F	-0.006	EUR8F	PUR15F	0.590498
EUR12F	EUR10P	-0.045	EUR8F	EUR9P	0.596825
EUR12F	EUR10M	0.126	EUR8F	EUR9M	0.606624
EUR12F	EUR10F	-0.085	EUR8F	EUR9F	0.582039
EUR12F	EUR5P	-0.1	EUR8F	EUR10P	0.604266
EUR12F	EUR5M	0.094	EUR8F	EUR10M	0.602139
EUR12F	EUR5F	-0.079	EUR8F	EUR10F	0.598368
EUR8P	EUR8M	0.545	EUR8F	EUR5P	0.589852
EUR8P	EUR8F	0.435	EUR8F	EUR5M	0.614607
EUR8P	EUR4P	-0.064	EUR8F	EUR5F	0.58266
EUR8P	EUR4M	-0.15	EUR4P	AFR1P	0.575249
EUR8P	EUR4F	-0.073	EUR4P	AFR1M	0.571567
EUR8P	EUR3P	-0.07	EUR4P	AFR1F	0.569671
EUR8P	EUR3M	-0.084	EUR4P	EUR4M	0.780092
EUR8P	EUR3F	-0.183	EUR4P	EUR4F	0.764635
EUR8P	EUR1P	-0.145	EUR4P	EUR3P	0.606597
EUR8P	EUR1M	-0.111	EUR4P	EUR3M	0.602723
EUR8P	EUR1F	-0.059	EUR4P	EUR3F	0.597561
EUR8P	PUR1P	-0.152	EUR4P	EUR1P	0.614909
EUR8P	PUR1M	-0.038	EUR4P	EUR1M	0.608657
EUR8P	PUR1F	-0.067	EUR4P	EUR1F	0.603098
EUR8P	PUR2P	-0.084	EUR4P	PUR1P	0.574884
EUR8P	PUR2M	-0.077	EUR4P	PUR1M	0.580733
EUR8P	PUR2F	-0.015	EUR4P	PUR1F	0.580082
EUR8P	PUR3P	-0.112	EUR4P	PUR2P	0.596473
EUR8P	PUR3M	-0.092	EUR4P	PUR2M	0.597395
EUR8P	PUR3F	-0.117	EUR4P	PUR2F	0.608385
EUR8P	PUR4P	-0.076	EUR4P	PUR3P	0.580417
EUR8P	PUR4M	-0.098	EUR4P	PUR3M	0.5852
EUR8P	PUR4F	-0.329	EUR4P	PUR3F	0.584748
EUR8P	PUR5P	-0.015	EUR4P	PUR4P	0.590483
EUR8P	PUR5M	-0.005	EUR4P	PUR4M	0.584261
EUR8P	PUR5F	0.016	EUR4P	PUR4F	0.584718
EUR8P	PUR6P	-0.091	EUR4P	PUR5P	0.588936
EUR8P	PUR6M	-0.058	EUR4P	PUR5M	0.57543
EUR8P	PUR6F	-0.126	EUR4P	PUR5F	0.593741
EUR8P	EUR15P	-0.093	EUR4P	PUR6P	0.597189
EUR8P	EUR15M	-0.076	EUR4P	PUR6M	0.608287
EUR8P	EUR15F	-0.083	EUR4P	PUR6F	0.58652
EUR8P	EUR2P	-0.085	EUR4P	EUR15P	0.563741
EUR8P	EUR2M	-0.139	EUR4P	EUR15M	0.57668
EUR8P	EUR2F	-0.102	EUR4P	EUR15F	0.576043
EUR8P	PUR7P	-0.059	EUR4P	EUR2P	0.599745
EUR8P	PUR7M	-0.105	EUR4P	EUR2M	0.59705
EUR8P	PUR7F	-0.016	EUR4P	EUR2F	0.611305
EUR8P	PUR8P	-0.12	EUR4P	PUR7P	0.592666
EUR8P	PUR8M	-0.066	EUR4P	PUR7M	0.59602
EUR8P	PUR8F	-0.119	EUR4P	PUR7F	0.593655
EUR8P	PUR9P	0.058	EUR4P	PUR8P	0.583367
EUR8P	PUR9M	0.01	EUR4P	PUR8M	0.574062
EUR8P	PUR9F	-0.035	EUR4P	PUR8F	0.597512
EUR8P	PUR10P	0.032	EUR4P	PUR9P	0.583639
EUR8P	PUR10M	-0.022	EUR4P	PUR9M	0.589414
EUR8P	PUR10F	-0.083	EUR4P	PUR9F	0.572238
EUR8P	PUR11P	-0.037	EUR4P	PUR10P	0.58291
EUR8P	PUR11M	-0.135	EUR4P	PUR10M	0.588722
EUR8P	PUR11F	0.044	EUR4P	PUR10F	0.594453
EUR8P	PUR12P	-0.005	EUR4P	PUR11P	0.588589
EUR8P	PUR12M	-0.059	EUR4P	PUR11M	0.580924
EUR8P	PUR12F	-0.086	EUR4P	PUR11F	0.594869
EUR8P	PUR13P	-0.033	EUR4P	PUR12P	0.615242
EUR8P	PUR13M	-0.108	EUR4P	PUR12M	0.588796
EUR8P	PUR13F	-0.037	EUR4P	PUR12F	0.601623
EUR8P	PUR14P	-0.005	EUR4P	PUR13P	0.587753
EUR8P	PUR14M	0.04	EUR4P	PUR13M	0.58098
EUR8P	PUR14F	-0.045	EUR4P	PUR13F	0.596926
EUR8P	EUR14P	-0.016	EUR4P	PUR14P	0.589739
EUR8P	EUR14M	-0.052	EUR4P	PUR14M	0.594503
EUR8P	EUR14F	-0.028	EUR4P	PUR14F	0.60714
EUR8P	PUR15P	-0.085	EUR4P	EUR14P	0.607711
EUR8P	PUR15M	-0.089	EUR4P	EUR14M	0.598884
EUR8P	PUR15F	0.005	EUR4P	EUR14F	0.611861
EUR8P	EUR9P	-0.021	EUR4P	PUR15P	0.60068
EUR8P	EUR9M	-0.037	EUR4P	PUR15M	0.589195
EUR8P	EUR9F	-0.088	EUR4P	PUR15F	0.610268
EUR8P	EUR10P	-0.133	EUR4P	EUR9P	0.60241
EUR8P	EUR10M	0	EUR4P	EUR9M	0.590774
EUR8P	EUR10F	-0.017	EUR4P	EUR9F	0.60332
EUR8P	EUR5P	-0.157	EUR4P	EUR10P	0.623603
EUR8P	EUR5M	0.053	EUR4P	EUR10M	0.609158
EUR8P	EUR5F	-0.093	EUR4P	EUR10F	0.615102
EUR8M	EUR8F	-0.047	EUR4P	EUR5P	0.59457
EUR8M	EUR4P	-0.108	EUR4P	EUR5M	0.598427
EUR8M	EUR4M	-0.156	EUR4P	EUR5F	0.603631
EUR8M	EUR4F	-0.056	EUR4M	AFR1P	0.57586
EUR8M	EUR3P	-0.054	EUR4M	AFR1M	0.570395
EUR8M	EUR3M	-0.123	EUR4M	AFR1F	0.57312
EUR8M	EUR3F	-0.133	EUR4M	EUR4F	0.582551
EUR8M	EUR1P	-0.058	EUR4M	EUR3P	0.611024
EUR8M	EUR1M	-0.052	EUR4M	EUR3M	0.607751
EUR8M	EUR1F	-0.031	EUR4M	EUR3F	0.589441
EUR8M	PUR1P	-0.095	EUR4M	EUR1P	0.608217
EUR8M	PUR1M	0	EUR4M	EUR1M	0.602448
EUR8M	PUR1F	0	EUR4M	EUR1F	0.608452
EUR8M	PUR2P	0.005	EUR4M	PUR1P	0.583915
EUR8M	PUR2M	-0.036	EUR4M	PUR1M	0.578323
EUR8M	PUR2F	-0.07	EUR4M	PUR1F	0.577716
EUR8M	PUR3P	-0.005	EUR4M	PUR2P	0.59056
EUR8M	PUR3M	-0.009	EUR4M	PUR2M	0.603528
EUR8M	PUR3F	-0.099	EUR4M	PUR2F	0.588641
EUR8M	PUR4P	-0.092	EUR4M	PUR3P	0.587934
EUR8M	PUR4M	-0.068	EUR4M	PUR3M	0.584874
EUR8M	PUR4F	-0.323	EUR4M	PUR3F	0.591923
EUR8M	PUR5P	0.035	EUR4M	PUR4P	0.577795
EUR8M	PUR5M	0.076	EUR4M	PUR4M	0.586091
EUR8M	PUR5F	0.017	EUR4M	PUR4F	0.568028
EUR8M	PUR6P	-0.058	EUR4M	PUR5P	0.585062
EUR8M	PUR6M	-0.089	EUR4M	PUR5M	0.580325
EUR8M	PUR6F	-0.047	EUR4M	PUR5F	0.592385
EUR8M	EUR15P	-0.048	EUR4M	PUR6P	0.584532
EUR8M	EUR15M	0.005	EUR4M	PUR6M	0.592696
EUR8M	EUR15F	-0.041	EUR4M	PUR6F	0.588213
EUR8M	EUR2P	-0.041	EUR4M	EUR15P	0.574192
EUR8M	EUR2M	-0.074	EUR4M	EUR15M	0.585655
EUR8M	EUR2F	-0.069	EUR4M	EUR15F	0.583607
EUR8M	PUR7P	-0.025	EUR4M	EUR2P	0.605002
EUR8M	PUR7M	-0.01	EUR4M	EUR2M	0.60701
EUR8M	PUR7F	0.005	EUR4M	EUR2F	0.600302
EUR8M	PUR8P	-0.048	EUR4M	PUR7P	0.592923
EUR8M	PUR8M	-0.019	EUR4M	PUR7M	0.60224
EUR8M	PUR8F	-0.08	EUR4M	PUR7F	0.594322
EUR8M	PUR9P	0.041	EUR4M	PUR8P	0.58024
EUR8M	PUR9M	0.016	EUR4M	PUR8M	0.566066
EUR8M	PUR9F	0.005	EUR4M	PUR8F	0.589694
EUR8M	PUR10P	-0.006	EUR4M	PUR9P	0.589311
EUR8M	PUR10M	-0.084	EUR4M	PUR9M	0.592505
EUR8M	PUR10F	-0.095	EUR4M	PUR9F	0.589919
EUR8M	PUR11P	-0.048	EUR4M	PUR10P	0.574347
EUR8M	PUR11M	-0.042	EUR4M	PUR10M	0.571999
EUR8M	PUR11F	0.005	EUR4M	PUR10F	0.598443
EUR8M	PUR12P	-0.129	EUR4M	PUR11P	0.5965
EUR8M	PUR12M	-0.094	EUR4M	PUR11M	0.577758
EUR8M	PUR12F	-0.088	EUR4M	PUR11F	0.598449
EUR8M	PUR13P	0.05	EUR4M	PUR12P	0.598829
EUR8M	PUR13M	-0.068	EUR4M	PUR12M	0.596511
EUR8M	PUR13F	0.016	EUR4M	PUR12F	0.590776
EUR8M	PUR14P	-0.061	EUR4M	PUR13P	0.582267
EUR8M	PUR14M	-0.042	EUR4M	PUR13M	0.57827
EUR8M	PUR14F	-0.016	EUR4M	PUR13F	0.590783
EUR8M	EUR14P	0.038	EUR4M	PUR14P	0.593587
EUR8M	EUR14M	-0.011	EUR4M	PUR14M	0.590322
EUR8M	EUR14F	0	EUR4M	PUR14F	0.601422
EUR8M	PUR15P	-0.11	EUR4M	EUR14P	0.600569
EUR8M	PUR15M	-0.025	EUR4M	EUR14M	0.592822
EUR8M	PUR15F	-0.051	EUR4M	EUR14F	0.594955
EUR8M	EUR9P	0.037	EUR4M	PUR15P	0.589739
EUR8M	EUR9M	0	EUR4M	PUR15M	0.582418
EUR8M	EUR9F	-0.052	EUR4M	PUR15F	0.605113
EUR8M	EUR10P	-0.093	EUR4M	EUR9P	0.59137
EUR8M	EUR10M	0.048	EUR4M	EUR9M	0.583558
EUR8M	EUR10F	-0.046	EUR4M	EUR9F	0.608582
EUR8M	EUR5P	-0.181	EUR4M	EUR10P	0.604758
EUR8M	EUR5M	0.085	EUR4M	EUR10M	0.591945
EUR8M	EUR5F	-0.012	EUR4M	EUR10F	0.606817
EUR8F	EUR4P	-0.131	EUR4M	EUR5P	0.589135
EUR8F	EUR4M	-0.288	EUR4M	EUR5M	0.593839
EUR8F	EUR4F	-0.155	EUR4M	EUR5F	0.599755
EUR8F	EUR3P	0	EUR4F	AFR1P	0.579813
EUR8F	EUR3M	-0.049	EUR4F	AFR1M	0.589134
EUR8F	EUR3F	-0.057	EUR4F	AFR1F	0.578531
EUR8F	EUR1P	-0.182	EUR4F	EUR3P	0.614279
EUR8F	EUR1M	-0.169	EUR4F	EUR3M	0.605574
EUR8F	EUR1F	-0.186	EUR4F	EUR3F	0.607637
EUR8F	PUR1P	-0.186	EUR4F	EUR1P	0.619076
EUR8F	PUR1M	-0.11	EUR4F	EUR1M	0.59861
EUR8F	PUR1F	-0.106	EUR4F	EUR1F	0.607747
EUR8F	PUR2P	-0.124	EUR4F	PUR1P	0.582186
EUR8F	PUR2M	-0.109	EUR4F	PUR1M	0.590935
EUR8F	PUR2F	-0.06	EUR4F	PUR1F	0.585584
EUR8F	PUR3P	-0.178	EUR4F	PUR2P	0.59757
EUR8F	PUR3M	-0.072	EUR4F	PUR2M	0.581495
EUR8F	PUR3F	-0.196	EUR4F	PUR2F	0.623641
EUR8F	PUR4P	-0.151	EUR4F	PUR3P	0.588999
EUR8F	PUR4M	-0.218	EUR4F	PUR3M	0.602733
EUR8F	PUR4F	-0.361	EUR4F	PUR3F	0.589262
EUR8F	PUR5P	-0.113	EUR4F	PUR4P	0.587205
EUR8F	PUR5M	-0.087	EUR4F	PUR4M	0.566968
EUR8F	PUR5F	-0.076	EUR4F	PUR4F	0.594273
EUR8F	PUR6P	-0.143	EUR4F	PUR5P	0.610468
EUR8F	PUR6M	-0.039	EUR4F	PUR5M	0.584313
EUR8F	PUR6F	-0.139	EUR4F	PUR5F	0.607526
EUR8F	EUR15P	-0.161	EUR4F	PUR6P	0.624376
EUR8F	EUR15M	-0.052	EUR4F	PUR6M	0.612573
EUR8F	EUR15F	-0.22	EUR4F	PUR6F	0.61703
EUR8F	EUR2P	-0.138	EUR4F	EUR15P	0.586344
EUR8F	EUR2M	-0.113	EUR4F	EUR15M	0.584006
EUR8F	EUR2F	-0.012	EUR4F	EUR15F	0.588371
EUR8F	PUR7P	-0.053	EUR4F	EUR2P	0.615094
EUR8F	PUR7M	-0.129	EUR4F	EUR2M	0.606945
EUR8F	PUR7F	-0.116	EUR4F	EUR2F	0.620566
EUR8F	PUR8P	-0.179	EUR4F	PUR7P	0.595822
EUR8F	PUR8M	-0.177	EUR4F	PUR7M	0.593163
EUR8F	PUR8F	-0.167	EUR4F	PUR7F	0.587722
EUR8F	PUR9P	-0.101	EUR4F	PUR8P	0.582839
EUR8F	PUR9M	-0.189	EUR4F	PUR8M	0.590373
EUR8F	PUR9F	-0.123	EUR4F	PUR8F	0.608563
EUR8F	PUR10P	-0.089	EUR4F	PUR9P	0.580394
EUR8F	PUR10M	-0.23	EUR4F	PUR9M	0.588148
EUR8F	PUR10F	-0.109	EUR4F	PUR9F	0.566976
EUR8F	PUR11P	-0.097	EUR4F	PUR10P	0.600231
EUR8F	PUR11M	-0.16	EUR4F	PUR10M	0.597512
EUR8F	PUR11F	-0.118	EUR4F	PUR10F	0.594757
EUR8F	PUR12P	0	EUR4F	PUR11P	0.586464
EUR8F	PUR12M	-0.13	EUR4F	PUR11M	0.591436
EUR8F	PUR12F	-0.141	EUR4F	PUR11F	0.585052
EUR8F	PUR13P	-0.125	EUR4F	PUR12P	0.626435
EUR8F	PUR13M	-0.199	EUR4F	PUR12M	0.610607
EUR8F	PUR13F	-0.076	EUR4F	PUR12F	0.602974
EUR8F	PUR14P	-0.039	EUR4F	PUR13P	0.596255
EUR8F	PUR14M	-0.037	EUR4F	PUR13M	0.583768
EUR8F	PUR14F	-0.105	EUR4F	PUR13F	0.615818
EUR8F	EUR14P	0	EUR4F	PUR14P	0.592702
EUR8F	EUR14M	-0.127	EUR4F	PUR14M	0.606592
EUR8F	EUR14F	-0.083	EUR4F	PUR14F	0.588977
EUR8F	PUR15P	-0.131	EUR4F	EUR14P	0.58875
EUR8F	PUR15M	-0.053	EUR4F	EUR14M	0.592963
EUR8F	PUR15F	-0.075	EUR4F	EUR14F	0.613902
EUR8F	EUR9P	-0.035	EUR4F	PUR15P	0.609844
EUR8F	EUR9M	0.016	EUR4F	PUR15M	0.606537
EUR8F	EUR9F	-0.055	EUR4F	PUR15F	0.605132
EUR8F	EUR10P	-0.16	EUR4F	EUR9P	0.601509
EUR8F	EUR10M	-0.033	EUR4F	EUR9M	0.60881
EUR8F	EUR10F	-0.061	EUR4F	EUR9F	0.597161
EUR8F	EUR5P	-0.1	EUR4F	EUR10P	0.628504
EUR8F	EUR5M	-0.081	EUR4F	EUR10M	0.588517
EUR8F	EUR5F	-0.07	EUR4F	EUR10F	0.627428
EUR4P	EUR4M	0.423	EUR4F	EUR5P	0.589778
EUR4P	EUR4F	0.436	EUR4F	EUR5M	0.624007
EUR4P	EUR3P	-0.082	EUR4F	EUR5F	0.595659
EUR4P	EUR3M	-0.093	EUR3P	AFR1P	0.574659
EUR4P	EUR3F	-0.272	EUR3P	AFR1M	0.572776
EUR4P	EUR1P	-0.183	EUR3P	AFR1F	0.579165
EUR4P	EUR1M	-0.122	EUR3P	EUR3M	0.778452
EUR4P	EUR1F	-0.2	EUR3P	EUR3F	0.776298
EUR4P	PUR1P	-0.198	EUR3P	EUR1P	0.599157
EUR4P	PUR1M	-0.113	EUR3P	EUR1M	0.604726
EUR4P	PUR1F	-0.126	EUR3P	EUR1F	0.600588
EUR4P	PUR2P	-0.075	EUR3P	PUR1P	0.592655
EUR4P	PUR2M	-0.044	EUR3P	PUR1M	0.595188
EUR4P	PUR2F	-0.085	EUR3P	PUR1F	0.583442
EUR4P	PUR3P	-0.132	EUR3P	PUR2P	0.606798
EUR4P	PUR3M	-0.038	EUR3P	PUR2M	0.591666
EUR4P	PUR3F	-0.236	EUR3P	PUR2F	0.604076
EUR4P	PUR4P	-0.245	EUR3P	PUR3P	0.578657
EUR4P	PUR4M	-0.123	EUR3P	PUR3M	0.587617
EUR4P	PUR4F	-0.407	EUR3P	PUR3F	0.593716
EUR4P	PUR5P	-0.176	EUR3P	PUR4P	0.594784
EUR4P	PUR5M	-0.116	EUR3P	PUR4M	0.590861
EUR4P	PUR5F	-0.219	EUR3P	PUR4F	0.569767
EUR4P	PUR6P	-0.126	EUR3P	PUR5P	0.588564
EUR4P	PUR6M	-0.017	EUR3P	PUR5M	0.579631
EUR4P	PUR6F	-0.071	EUR3P	PUR5F	0.598882
EUR4P	EUR15P	-0.2	EUR3P	PUR6P	0.609677
EUR4P	EUR15M	-0.139	EUR3P	PUR6M	0.608549
EUR4P	EUR15F	-0.172	EUR3P	PUR6F	0.609784
EUR4P	EUR2P	-0.063	EUR3P	EUR15P	0.581791
EUR4P	EUR2M	-0.119	EUR3P	EUR15M	0.582292
EUR4P	EUR2F	-0.06	EUR3P	EUR15F	0.599011
EUR4P	PUR7P	-0.101	EUR3P	EUR2P	0.587851
EUR4P	PUR7M	-0.17	EUR3P	EUR2M	0.601462
EUR4P	PUR7F	-0.118	EUR3P	EUR2F	0.599067
EUR4P	PUR8P	-0.09	EUR3P	PUR7P	0.595122
EUR4P	PUR8M	-0.084	EUR3P	PUR7M	0.606188
EUR4P	PUR8F	-0.091	EUR3P	PUR7F	0.585239
EUR4P	PUR9P	-0.108	EUR3P	PUR8P	0.597139
EUR4P	PUR9M	-0.098	EUR3P	PUR8M	0.592457
EUR4P	PUR9F	-0.031	EUR3P	PUR8F	0.605631
EUR4P	PUR10P	-0.113	EUR3P	PUR9P	0.589658
EUR4P	PUR10M	-0.093	EUR3P	PUR9M	0.599864
EUR4P	PUR10F	-0.213	EUR3P	PUR9F	0.575277
EUR4P	PUR11P	-0.072	EUR3P	PUR10P	0.588649
EUR4P	PUR11M	-0.156	EUR3P	PUR10M	0.591297
EUR4P	PUR11F	-0.042	EUR3P	PUR10F	0.593313
EUR4P	PUR12P	-0.087	EUR3P	PUR11P	0.616538
EUR4P	PUR12M	-0.16	EUR3P	PUR11M	0.587088
EUR4P	PUR12F	-0.16	EUR3P	PUR11F	0.597114
EUR4P	PUR13P	-0.105	EUR3P	PUR12P	0.607914
EUR4P	PUR13M	-0.2	EUR3P	PUR12M	0.620122
EUR4P	PUR13F	-0.135	EUR3P	PUR12F	0.597086
EUR4P	PUR14P	-0.124	EUR3P	PUR13P	0.597341
EUR4P	PUR14M	-0.115	EUR3P	PUR13M	0.592171
EUR4P	PUR14F	-0.059	EUR3P	PUR13F	0.596187
EUR4P	EUR14P	-0.023	EUR3P	PUR14P	0.594454
EUR4P	EUR14M	-0.114	EUR3P	PUR14M	0.603384
EUR4P	EUR14F	-0.136	EUR3P	PUR14F	0.606573
EUR4P	PUR15P	-0.205	EUR3P	EUR14P	0.588611
EUR4P	PUR15M	-0.102	EUR3P	EUR14M	0.587135
EUR4P	PUR15F	-0.145	EUR3P	EUR14F	0.598145
EUR4P	EUR9P	-0.075	EUR3P	PUR15P	0.569866
EUR4P	EUR9M	0.017	EUR3P	PUR15M	0.572015
EUR4P	EUR9F	-0.136	EUR3P	PUR15F	0.585602
EUR4P	EUR10P	-0.065	EUR3P	EUR9P	0.597504
EUR4P	EUR10M	-0.006	EUR3P	EUR9M	0.583301
EUR4P	EUR10F	0.006	EUR3P	EUR9F	0.605659
EUR4P	EUR5P	-0.212	EUR3P	EUR10P	0.595415
EUR4P	EUR5M	-0.026	EUR3P	EUR10M	0.579055
EUR4P	EUR5F	-0.165	EUR3P	EUR10F	0.609603
EUR4M	EUR4F	-0.121	EUR3P	EUR5P	0.60658
EUR4M	EUR3P	-0.231	EUR3P	EUR5M	0.607061
EUR4M	EUR3M	-0.244	EUR3P	EUR5F	0.62337
EUR4M	EUR3F	-0.382	EUR3M	AFR1P	0.57872
EUR4M	EUR1P	-0.253	EUR3M	AFR1M	0.579335
EUR4M	EUR1M	-0.13	EUR3M	AFR1F	0.579266
EUR4M	EUR1F	-0.207	EUR3M	EUR3F	0.573751
EUR4M	PUR1P	-0.286	EUR3M	EUR1P	0.606078
EUR4M	PUR1M	-0.133	EUR3M	EUR1M	0.61067
EUR4M	PUR1F	-0.188	EUR3M	EUR1F	0.603816
EUR4M	PUR2P	-0.089	EUR3M	PUR1P	0.580626
EUR4M	PUR2M	-0.126	EUR3M	PUR1M	0.59967
EUR4M	PUR2F	-0.075	EUR3M	PUR1F	0.568313
EUR4M	PUR3P	-0.153	EUR3M	PUR2P	0.607392
EUR4M	PUR3M	-0.146	EUR3M	PUR2M	0.589785
EUR4M	PUR3F	-0.378	EUR3M	PUR2F	0.609573
EUR4M	PUR4P	-0.181	EUR3M	PUR3P	0.591063
EUR4M	PUR4M	-0.114	EUR3M	PUR3M	0.598393
EUR4M	PUR4F	-0.418	EUR3M	PUR3F	0.595792
EUR4M	PUR5P	-0.217	EUR3M	PUR4P	0.598538
EUR4M	PUR5M	-0.249	EUR3M	PUR4M	0.593028
EUR4M	PUR5F	-0.147	EUR3M	PUR4F	0.57738
EUR4M	PUR6P	-0.186	EUR3M	PUR5P	0.580407
EUR4M	PUR6M	-0.15	EUR3M	PUR5M	0.582858
EUR4M	PUR6F	-0.15	EUR3M	PUR5F	0.596885
EUR4M	EUR15P	-0.193	EUR3M	PUR6P	0.617019
EUR4M	EUR15M	-0.061	EUR3M	PUR6M	0.59338
EUR4M	EUR15F	-0.174	EUR3M	PUR6F	0.611647
EUR4M	EUR2P	-0.113	EUR3M	EUR15P	0.583302
EUR4M	EUR2M	-0.164	EUR3M	EUR15M	0.582143
EUR4M	EUR2F	-0.145	EUR3M	EUR15F	0.589659
EUR4M	PUR7P	-0.134	EUR3M	EUR2P	0.597483
EUR4M	PUR7M	-0.134	EUR3M	EUR2M	0.598852
EUR4M	PUR7F	-0.14	EUR3M	EUR2F	0.598803
EUR4M	PUR8P	-0.178	EUR3M	PUR7P	0.598177
EUR4M	PUR8M	-0.09	EUR3M	PUR7M	0.601912
EUR4M	PUR8F	-0.101	EUR3M	PUR7F	0.589664
EUR4M	PUR9P	-0.184	EUR3M	PUR8P	0.59444
EUR4M	PUR9M	-0.171	EUR3M	PUR8M	0.578838
EUR4M	PUR9F	-0.114	EUR3M	PUR8F	0.601519
EUR4M	PUR10P	-0.066	EUR3M	PUR9P	0.592869
EUR4M	PUR10M	-0.097	EUR3M	PUR9M	0.592904
EUR4M	PUR10F	-0.321	EUR3M	PUR9F	0.585259
EUR4M	PUR11P	-0.159	EUR3M	PUR10P	0.600747
EUR4M	PUR11M	-0.146	EUR3M	PUR10M	0.593412
EUR4M	PUR11F	-0.127	EUR3M	PUR10F	0.594059
EUR4M	PUR12P	-0.053	EUR3M	PUR11P	0.599153
EUR4M	PUR12M	-0.095	EUR3M	PUR11M	0.580699
EUR4M	PUR12F	-0.12	EUR3M	PUR11F	0.61155
EUR4M	PUR13P	-0.127	EUR3M	PUR12P	0.602486
EUR4M	PUR13M	-0.208	EUR3M	PUR12M	0.601794
EUR4M	PUR13F	-0.254	EUR3M	PUR12F	0.608211
EUR4M	PUR14P	-0.12	EUR3M	PUR13P	0.600528
EUR4M	PUR14M	-0.179	EUR3M	PUR13M	0.588331
EUR4M	PUR14F	-0.139	EUR3M	PUR13F	0.611744
EUR4M	EUR14P	-0.127	EUR3M	PUR14P	0.595083
EUR4M	EUR14M	-0.183	EUR3M	PUR14M	0.593796
EUR4M	EUR14F	-0.257	EUR3M	PUR14F	0.596262
EUR4M	PUR15P	-0.134	EUR3M	EUR14P	0.595888
EUR4M	PUR15M	-0.078	EUR3M	EUR14M	0.589813
EUR4M	PUR15F	-0.133	EUR3M	EUR14F	0.608766
EUR4M	EUR9P	-0.225	EUR3M	PUR15P	0.584183
EUR4M	EUR9M	-0.148	EUR3M	PUR15M	0.57961
EUR4M	EUR9F	-0.177	EUR3M	PUR15F	0.593825
EUR4M	EUR10P	-0.204	EUR3M	EUR9P	0.600415
EUR4M	EUR10M	-0.051	EUR3M	EUR9M	0.591884
EUR4M	EUR10F	-0.156	EUR3M	EUR9F	0.595411
EUR4M	EUR5P	-0.215	EUR3M	EUR10P	0.577746
EUR4M	EUR5M	-0.072	EUR3M	EUR10M	0.567581
EUR4M	EUR5F	-0.188	EUR3M	EUR10F	0.5983
EUR4F	EUR3P	-0.02	EUR3M	EUR5P	0.594005
EUR4F	EUR3M	-0.089	EUR3M	EUR5M	0.595615
EUR4F	EUR3F	-0.245	EUR3M	EUR5F	0.604164
EUR4F	EUR1P	-0.194	EUR3F	AFR1P	0.57634
EUR4F	EUR1M	-0.071	EUR3F	AFR1M	0.584311
EUR4F	EUR1F	-0.101	EUR3F	AFR1F	0.578716
EUR4F	PUR1P	-0.109	EUR3F	EUR1P	0.627924
EUR4F	PUR1M	-0.033	EUR3F	EUR1M	0.605135
EUR4F	PUR1F	-0.077	EUR3F	EUR1F	0.602018
EUR4F	PUR2P	-0.029	EUR3F	PUR1P	0.588396
EUR4F	PUR2M	0.011	EUR3F	PUR1M	0.594061
EUR4F	PUR2F	-0.046	EUR3F	PUR1F	0.594382
EUR4F	PUR3P	-0.178	EUR3F	PUR2P	0.594955
EUR4F	PUR3M	-0.015	EUR3F	PUR2M	0.585268
EUR4F	PUR3F	-0.243	EUR3F	PUR2F	0.616975
EUR4F	PUR4P	-0.22	EUR3F	PUR3P	0.575211
EUR4F	PUR4M	-0.046	EUR3F	PUR3M	0.601756
EUR4F	PUR4F	-0.355	EUR3F	PUR3F	0.585195
EUR4F	PUR5P	-0.135	EUR3F	PUR4P	0.590943
EUR4F	PUR5M	-0.074	EUR3F	PUR4M	0.574521
EUR4F	PUR5F	-0.197	EUR3F	PUR4F	0.595015
EUR4F	PUR6P	-0.153	EUR3F	PUR5P	0.601712
EUR4F	PUR6M	-0.031	EUR3F	PUR5M	0.58276
EUR4F	PUR6F	-0.079	EUR3F	PUR5F	0.607985
EUR4F	EUR15P	-0.214	EUR3F	PUR6P	0.614506
EUR4F	EUR15M	-0.112	EUR3F	PUR6M	0.616673
EUR4F	EUR15F	-0.122	EUR3F	PUR6F	0.594041
EUR4F	EUR2P	-0.258	EUR3F	EUR15P	0.586472
EUR4F	EUR2M	-0.229	EUR3F	EUR15M	0.585666
EUR4F	EUR2F	-0.05	EUR3F	EUR15F	0.602098
EUR4F	PUR7P	-0.144	EUR3F	EUR2P	0.603285
EUR4F	PUR7M	-0.059	EUR3F	EUR2M	0.597768
EUR4F	PUR7F	-0.173	EUR3F	EUR2F	0.613887
EUR4F	PUR8P	-0.049	EUR3F	PUR7P	0.602917
EUR4F	PUR8M	-0.032	EUR3F	PUR7M	0.596526
EUR4F	PUR8F	-0.071	EUR3F	PUR7F	0.59621
EUR4F	PUR9P	-0.043	EUR3F	PUR8P	0.595437
EUR4F	PUR9M	-0.055	EUR3F	PUR8M	0.589022
EUR4F	PUR9F	-0.027	EUR3F	PUR8F	0.619233
EUR4F	PUR10P	-0.084	EUR3F	PUR9P	0.584381
EUR4F	PUR10M	-0.126	EUR3F	PUR9M	0.601913
EUR4F	PUR10F	-0.109	EUR3F	PUR9F	0.556868
EUR4F	PUR11P	-0.092	EUR3F	PUR10P	0.611823
EUR4F	PUR11M	-0.077	EUR3F	PUR10M	0.614469
EUR4F	PUR11F	-0.011	EUR3F	PUR10F	0.597605
EUR4F	PUR12P	-0.142	EUR3F	PUR11P	0.592656
EUR4F	PUR12M	-0.091	EUR3F	PUR11M	0.581178
EUR4F	PUR12F	-0.173	EUR3F	PUR11F	0.58699
EUR4F	PUR13P	-0.113	EUR3F	PUR12P	0.616678
EUR4F	PUR13M	-0.232	EUR3F	PUR12M	0.617032
EUR4F	PUR13F	-0.132	EUR3F	PUR12F	0.590597
EUR4F	PUR14P	-0.098	EUR3F	PUR13P	0.604459
EUR4F	PUR14M	-0.052	EUR3F	PUR13M	0.585543
EUR4F	PUR14F	-0.044	EUR3F	PUR13F	0.615921
EUR4F	EUR14P	0	EUR3F	PUR14P	0.585472
EUR4F	EUR14M	-0.066	EUR3F	PUR14M	0.612637
EUR4F	EUR14F	-0.129	EUR3F	PUR14F	0.586436
EUR4F	PUR15P	-0.084	EUR3F	EUR14P	0.58097
EUR4F	PUR15M	-0.033	EUR3F	EUR14M	0.582848
EUR4F	PUR15F	-0.121	EUR3F	EUR14F	0.616311
EUR4F	EUR9P	-0.019	EUR3F	PUR15P	0.575124
EUR4F	EUR9M	-0.042	EUR3F	PUR15M	0.57888
EUR4F	EUR9F	-0.096	EUR3F	PUR15F	0.582639
EUR4F	EUR10P	-0.056	EUR3F	EUR9P	0.610016
EUR4F	EUR10M	0.086	EUR3F	EUR9M	0.614428
EUR4F	EUR10F	0.013	EUR3F	EUR9F	0.600953
EUR4F	EUR5P	-0.283	EUR3F	EUR10P	0.621672
EUR4F	EUR5M	-0.086	EUR3F	EUR10M	0.583893
EUR4F	EUR5F	-0.146	EUR3F	EUR10F	0.62257
EUR3P	EUR3M	0.442	EUR3F	EUR5P	0.61165
EUR3P	EUR3F	0.438	EUR3F	EUR5M	0.614598
EUR3P	EUR1P	-0.117	EUR3F	EUR5F	0.612146
EUR3P	EUR1M	-0.098	EUR1P	AFR1P	0.588971
EUR3P	EUR1F	0.013	EUR1P	AFR1M	0.576684
EUR3P	PUR1P	-0.074	EUR1P	AFR1F	0.592088
EUR3P	PUR1M	-0.06	EUR1P	EUR1M	0.773683
EUR3P	PUR1F	0.047	EUR1P	EUR1F	0.772072
EUR3P	PUR2P	-0.113	EUR1P	PUR1P	0.583536
EUR3P	PUR2M	-0.175	EUR1P	PUR1M	0.590369
EUR3P	PUR2F	-0.017	EUR1P	PUR1F	0.596586
EUR3P	PUR3P	-0.139	EUR1P	PUR2P	0.595137
EUR3P	PUR3M	-0.123	EUR1P	PUR2M	0.593954
EUR3P	PUR3F	-0.207	EUR1P	PUR2F	0.628589
EUR3P	PUR4P	-0.121	EUR1P	PUR3P	0.582178
EUR3P	PUR4M	-0.144	EUR1P	PUR3M	0.600318
EUR3P	PUR4F	-0.296	EUR1P	PUR3F	0.577777
EUR3P	PUR5P	-0.213	EUR1P	PUR4P	0.59753
EUR3P	PUR5M	-0.086	EUR1P	PUR4M	0.574006
EUR3P	PUR5F	-0.118	EUR1P	PUR4F	0.596654
EUR3P	PUR6P	-0.163	EUR1P	PUR5P	0.606898
EUR3P	PUR6M	-0.017	EUR1P	PUR5M	0.594964
EUR3P	PUR6F	-0.108	EUR1P	PUR5F	0.60411
EUR3P	EUR15P	-0.146	EUR1P	PUR6P	0.623169
EUR3P	EUR15M	-0.029	EUR1P	PUR6M	0.621659
EUR3P	EUR15F	-0.186	EUR1P	PUR6F	0.598105
EUR3P	EUR2P	-0.096	EUR1P	EUR15P	0.595568
EUR3P	EUR2M	-0.182	EUR1P	EUR15M	0.594454
EUR3P	EUR2F	0.059	EUR1P	EUR15F	0.589993
EUR3P	PUR7P	-0.091	EUR1P	EUR2P	0.628295
EUR3P	PUR7M	-0.096	EUR1P	EUR2M	0.600074
EUR3P	PUR7F	-0.111	EUR1P	EUR2F	0.632469
EUR3P	PUR8P	-0.091	EUR1P	PUR7P	0.598056
EUR3P	PUR8M	-0.127	EUR1P	PUR7M	0.593648
EUR3P	PUR8F	-0.117	EUR1P	PUR7F	0.602811
EUR3P	PUR9P	-0.049	EUR1P	PUR8P	0.587962
EUR3P	PUR9M	-0.035	EUR1P	PUR8M	0.589634
EUR3P	PUR9F	-0.088	EUR1P	PUR8F	0.619908
EUR3P	PUR10P	-0.115	EUR1P	PUR9P	0.608625
EUR3P	PUR10M	-0.209	EUR1P	PUR9M	0.600304
EUR3P	PUR10F	-0.085	EUR1P	PUR9F	0.582327
EUR3P	PUR11P	-0.094	EUR1P	PUR10P	0.612316
EUR3P	PUR11M	-0.172	EUR1P	PUR10M	0.619554
EUR3P	PUR11F	-0.053	EUR1P	PUR10F	0.589364
EUR3P	PUR12P	-0.067	EUR1P	PUR11P	0.589902
EUR3P	PUR12M	-0.16	EUR1P	PUR11M	0.596923
EUR3P	PUR12F	-0.139	EUR1P	PUR11F	0.595422
EUR3P	PUR13P	-0.103	EUR1P	PUR12P	0.632076
EUR3P	PUR13M	-0.206	EUR1P	PUR12M	0.613647
EUR3P	PUR13F	-0.118	EUR1P	PUR12F	0.605848
EUR3P	PUR14P	-0.057	EUR1P	PUR13P	0.606232
EUR3P	PUR14M	-0.156	EUR1P	PUR13M	0.575271
EUR3P	PUR14F	-0.106	EUR1P	PUR13F	0.635004
EUR3P	EUR14P	-0.029	EUR1P	PUR14P	0.587735
EUR3P	EUR14M	-0.167	EUR1P	PUR14M	0.603589
EUR3P	EUR14F	-0.044	EUR1P	PUR14F	0.589113
EUR3P	PUR15P	-0.121	EUR1P	EUR14P	0.602691
EUR3P	PUR15M	0.027	EUR1P	EUR14M	0.573445
EUR3P	PUR15F	-0.177	EUR1P	EUR14F	0.639083
EUR3P	EUR9P	-0.066	EUR1P	PUR15P	0.587243
EUR3P	EUR9M	-0.017	EUR1P	PUR15M	0.589824
EUR3P	EUR9F	-0.083	EUR1P	PUR15F	0.582221
EUR3P	EUR10P	-0.196	EUR1P	EUR9P	0.612826
EUR3P	EUR10M	-0.023	EUR1P	EUR9M	0.629615
EUR3P	EUR10F	-0.138	EUR1P	EUR9F	0.602252
EUR3P	EUR5P	-0.176	EUR1P	EUR10P	0.624596
EUR3P	EUR5M	-0.027	EUR1P	EUR10M	0.585394
[truncated: 2,279 more rows]

## Sheet: clustering_svs
chrom	pos	end	svtype	svlen	af
chr1	11669	11729	DEL	59	0.451613
chr1	243491	243589	DEL	97	0.795699
chr1	249912	249913	INS	280	0.833333
chr1	339246	339247	INS	85	0.56962
chr1	569978	569979	INS	59	0.633333
chr1	677970	677971	INS	330	0.604938
chr1	1000188	1000189	INS	96	0.54
chr1	1085921	1085922	INS	53	0.612903
chr1	1101414	1101582	DEL	167	0.946237
chr1	1577122	1577208	DEL	85	0.746667
chr1	1582520	1582683	DEL	162	0.666667
chr1	1891879	1891994	DEL	114	0.571429
chr1	2034022	2034253	DEL	230	0.469136
chr1	2043752	2043753	INS	80	0.481481
chr1	2111528	2111771	DEL	242	0.474684
chr1	2142599	2145647	DEL	3047	0.466667
chr1	2168302	2168420	DEL	117	0.46
chr1	2203974	2204537	DEL	562	0.446667
chr1	2221544	2224112	DEL	2567	0.473333
chr1	2233595	2233716	DEL	120	0.510753
chr1	2245940	2249114	DEL	3173	0.493827
chr1	2266520	2266724	DEL	203	0.513333
chr1	2276262	2276670	DEL	407	0.798851
chr1	2450941	2451139	DEL	197	0.683908
chr1	2461335	2461456	DEL	120	0.654321
chr1	2670139	2670436	DEL	296	0.556962
chr1	2715631	2715877	DEL	245	0.649425
chr1	2718656	2718718	DEL	61	0.718391
chr1	2803792	2804525	DEL	732	0.524691
chr1	3080115	3080212	DEL	96	0.817204
chr1	3243990	3244054	DEL	63	0.983871
chr1	3345859	3345913	DEL	53	0.5
chr1	4179797	4179850	DEL	52	0.774194
chr1	4677079	4677080	INS	56	0.548387
chr1	4763183	4763236	DEL	52	0.72
chr1	4820992	4820993	INS	102	0.678161
chr1	5115698	5115762	DEL	63	0.609195
chr1	5398430	5398714	DEL	283	0.827957
chr1	6268425	6268559	DEL	133	0.946237
chr1	6282283	6282591	DEL	307	0.973118
chr1	6546990	6547173	DEL	182	0.693548
chr1	7073628	7073629	INS	62	0.765432
chr1	7360959	7361014	DEL	54	0.703704
chr1	7387637	7387701	DEL	63	0.574074
chr1	7395970	7396250	DEL	279	0.5
chr1	7483982	7484081	DEL	98	0.526667
chr1	8445643	8445878	DEL	234	0.753333
chr1	8611628	8611781	DEL	152	0.763441
chr1	8844935	8844936	INS	54	0.436782
chr1	9731355	9731443	DEL	87	0.567901
chr1	11167159	11167160	INS	293	0.36
chr1	12306435	12306648	DEL	212	0.839506
chr1	12521128	12521129	INS	58	0.435484
chr1	12562745	12562746	INS	102	0.58642
chr1	12572960	12575113	DEL	2152	0.483871
chr1	12610415	12610470	DEL	54	0.919355
chr1	12804043	12804097	DEL	53	0.629032
chr1	13009985	13010070	DEL	84	0.513333
chr1	15530975	15531035	DEL	59	0.736559
chr1	15752440	15752589	DEL	148	0.709677
chr1	16152246	16152342	DEL	95	0.456989
chr1	16451678	16459018	DEL	7339	0.537634
chr1	16760666	16760960	DEL	293	0.426667
chr1	17866359	17866447	DEL	87	0.666667
chr1	18101240	18101297	DEL	56	0.801075
chr1	18424803	18424861	DEL	57	0.555556
chr1	19451831	19451832	INS	66	0.845679
chr1	21251535	21251862	DEL	326	0.897849
chr1	22394206	22394299	DEL	92	0.790123
chr1	22424740	22424741	INS	53	0.626582
chr1	23489243	23489576	DEL	332	0.677419
chr1	23830968	23831116	DEL	147	0.58642
chr1	23848685	23848751	DEL	65	0.666667
chr1	23914203	23914522	DEL	318	0.533333
chr1	25241875	25241985	DEL	109	0.648148
chr1	25588592	25588593	INS	58	0.603448
chr1	26000751	26001079	DEL	327	0.709877
chr1	27214895	27214968	DEL	72	0.983871
chr1	27747981	27747982	INS	125	0.533333
chr1	28836912	28837236	DEL	323	0.747312
chr1	28897953	28898293	DEL	339	0.83871
chr1	30446392	30446456	DEL	63	0.672414
chr1	31029057	31029185	DEL	127	0.607527
chr1	33964395	33964396	INS	95	0.486667
chr1	34701890	34701959	DEL	68	0.586667
chr1	35024197	35024519	DEL	321	0.816092
chr1	36130578	36130805	DEL	226	0.850575
chr1	36551394	36551395	INS	361	0.466667
chr1	36603327	36603408	DEL	80	0.68
chr1	36820980	36821218	DEL	237	0.518519
chr1	36821916	36822202	DEL	285	0.633333
chr1	37214944	37215182	DEL	237	0.494253
chr1	37607286	37607287	INS	163	0.629032
chr1	37640229	37642619	DEL	2389	0.469136
chr1	38352288	38352289	INS	75	0.724138
chr1	39877788	39877789	INS	128	0.741935
chr1	40366278	40366279	INS	422	0.763441
chr1	42593141	42593142	INS	135	0.493827
chr1	43613731	43614041	DEL	309	0.691358
chr1	44667329	44667408	DEL	78	0.849462
chr1	45777638	45777972	DEL	333	0.747312
chr1	48962832	48962887	DEL	54	0.741379
chr1	50261712	50261824	DEL	111	0.678161
chr1	50443898	50444210	DEL	311	0.88172
chr1	51864936	51865266	DEL	329	0.973118
chr1	52505135	52505222	DEL	86	0.94086
chr1	54341755	54341898	DEL	142	0.505747
chr1	54444963	54445091	DEL	127	0.546667
chr1	54445397	54445807	DEL	409	0.546667
chr1	54748932	54748933	INS	52	0.557471
chr1	56807636	56807879	DEL	242	0.677419
chr1	57274573	57274574	INS	56	0.613333
chr1	57484950	57484951	INS	211	0.604938
chr1	57756397	57756722	DEL	324	0.567901
chr1	58607233	58607234	INS	60	0.678161
chr1	60701190	60701191	INS	240	0.561728
chr1	61496063	61496908	DEL	844	0.396552
chr1	62874366	62874687	DEL	320	0.698925
chr1	64612751	64612752	INS	97	0.793333
chr1	65675699	65676033	DEL	333	0.56
chr1	69501991	69502319	DEL	327	0.591398
chr1	69824823	69825142	DEL	318	0.94086
chr1	72023375	72023376	INS	62	0.698925
chr1	73144620	73144967	DEL	346	0.526667
chr1	74523709	74524045	DEL	335	0.887097
chr1	74600093	74600322	DEL	228	0.56
chr1	74874300	74874301	INS	63	0.978495
chr1	76484191	76484192	INS	122	0.752688
chr1	76840916	76841239	DEL	322	0.718391
chr1	77311234	77311808	DEL	573	0.768817
chr1	77900522	77900523	INS	116	0.695402
chr1	79410350	79410524	DEL	173	0.426667
chr1	79670507	79670796	DEL	288	0.68
chr1	80540756	80540757	INS	65	0.586667
chr1	80566180	80566509	DEL	328	0.54321
chr1	80776625	80782818	DEL	6192	0.774194
chr1	80895982	80896305	DEL	322	0.706897
chr1	81032590	81032591	INS	202	0.649425
chr1	82500675	82502287	DEL	1611	0.892473
chr1	82506750	82506751	INS	80	0.54023
chr1	82524563	82524624	DEL	60	0.685185
chr1	83601027	83601112	DEL	84	0.774194
chr1	83733135	83733136	INS	72	0.580247
chr1	83892678	83899385	DEL	6706	0.72043
chr1	86877798	86877799	INS	72	0.801075
chr1	87293927	87294414	DEL	486	0.870968
chr1	87663390	87663391	INS	156	0.83871
chr1	87668944	87669067	DEL	122	0.908602
chr1	91060798	91061117	DEL	318	0.806452
chr1	92058303	92058366	DEL	62	0.672043
chr1	94325803	94325804	INS	84	0.549383
chr1	94725165	94725484	DEL	318	0.741935
chr1	96000945	96001012	DEL	66	0.591954
chr1	97999089	97999090	INS	55	0.876344
chr1	98960325	98960383	DEL	57	0.7
chr1	99347901	99347966	DEL	64	0.801075
chr1	99356768	99356769	INS	111	0.95977
chr1	99358732	99358797	DEL	64	0.586022
chr1	100667551	100668066	DEL	514	0.686667
chr1	104730240	104730378	DEL	137	0.561728
chr1	108263979	108263980	INS	121	0.682796
chr1	108507462	108507546	DEL	83	0.747312
chr1	108516772	108516773	INS	361	0.919355
chr1	110788534	110788633	DEL	98	0.598765
chr1	111310362	111310363	INS	62	0.775862
chr1	111559405	111559780	DEL	374	0.567901
chr1	112237050	112237051	INS	56	0.768817
chr1	113012237	113014074	DEL	1836	0.505747
chr1	114512655	114512656	INS	312	0.649425
chr1	117269907	117269962	DEL	54	0.817204
chr1	117439870	117439871	INS	80	0.854839
chr1	118272399	118272803	DEL	403	0.956989
chr1	120330534	120330535	INS	748	0.734177
chr1	120415334	120415667	DEL	332	0.72043
chr1	120511444	120511865	DEL	420	0.518519
chr1	120842338	120843879	DEL	1540	0.927711
chr1	121159215	121159539	DEL	323	0.677419
chr1	121298067	121298228	DEL	160	0.706897
chr1	121626349	121627948	DEL	1598	0.623656
chr1	121627947	121627948	INS	268	0.604938
chr1	121630332	121630869	DEL	536	0.703704
chr1	121633159	121634780	DEL	1620	0.635802
chr1	121647181	121647588	DEL	406	0.425926
chr1	121659410	121661276	DEL	1865	0.545977
chr1	121661910	121665649	DEL	3738	0.543011
chr1	121677274	121677604	DEL	329	0.813187
chr1	121793118	121793966	DEL	847	0.711765
chr1	126621089	126625679	DEL	4589	0.741379
chr1	126629112	126630643	DEL	1530	0.736559
chr1	126785214	126785669	DEL	454	0.655914
chr1	126847495	126847496	INS	640	0.533333
chr1	127491124	127491593	DEL	468	0.584416
chr1	127557071	127557127	DEL	55	0.948276
chr1	127757888	127757889	INS	382	0.712644
chr1	127874563	127882129	DEL	7565	0.367816
chr1	127905993	127905994	INS	64	0.38
chr1	127913728	127913729	INS	60	0.393333
chr1	127927794	127927795	INS	105	0.382716
chr1	127928230	127928439	DEL	208	0.364198
chr1	127928969	127928970	INS	70	0.376543
chr1	128012887	128012958	DEL	70	0.758621
chr1	128031702	128031893	DEL	190	0.71978
chr1	128052634	128052635	INS	55	0.886076
chr1	128103225	128103226	INS	69	0.935484
chr1	128219138	128219139	INS	85	0.747312
chr1	128310542	128310611	DEL	68	0.602151
chr1	128312856	128312857	INS	68	0.346667
chr1	128324129	128324198	DEL	68	0.373563
chr1	128325274	128325275	INS	69	0.373563
chr1	128346208	128346209	INS	136	0.672043
chr1	128424304	128424305	INS	136	0.66129
chr1	128468909	128469317	DEL	407	0.424731
chr1	128478173	128478174	INS	68	0.424731
chr1	128492837	128492907	DEL	69	0.41954
chr1	128493367	128495896	DEL	2528	0.403226
chr1	128498163	128498164	INS	69	0.768817
chr1	128499043	128499044	INS	70	0.387097
chr1	128503179	128505314	DEL	2134	0.403226
chr1	128510521	128510590	DEL	68	0.467742
chr1	128514906	128514975	DEL	68	0.397849
chr1	128528027	128553925	DEL	25897	0.413978
chr1	128529458	128538970	DEL	9511	0.44
chr1	128559477	128559547	DEL	69	0.655914
chr1	128561942	128562012	DEL	69	0.419355
chr1	128563930	128564819	DEL	888	0.396552
chr1	128579291	128579360	DEL	68	0.688172
chr1	128651412	128651541	DEL	128	0.977011
chr1	128656805	128656886	DEL	80	0.725275
chr1	128674239	128674295	DEL	55	0.697531
chr1	128681351	128683071	DEL	1719	0.666667
chr1	128705090	128705256	DEL	165	0.654321
chr1	128735625	128736094	DEL	468	0.93956
chr1	128737530	128742068	DEL	4537	0.814815
chr1	128765321	128765422	DEL	100	0.727848
chr1	128909019	128909020	INS	73	0.731183
chr1	129015774	129015873	DEL	98	0.676471
chr1	142229479	142232556	DEL	3076	0.612903
chr1	142285320	142285321	INS	151	0.626374
chr1	142309555	142309639	DEL	83	0.598765
chr1	142348829	142349093	DEL	263	0.91954
chr1	143185816	143185886	DEL	69	0.493506
chr1	143186322	143186323	INS	70	0.545455
chr1	145738329	145738389	DEL	59	0.48
chr1	146155160	146155393	DEL	232	0.682796
chr1	147319397	147319502	DEL	104	0.653333
chr1	147340854	147340929	DEL	74	0.844086
chr1	149356389	149356444	DEL	54	0.58642
chr1	149558617	149558672	DEL	54	0.790323
chr1	149905551	149905552	INS	88	0.632184
chr1	151719619	151751819	DEL	32197	0.645161
chr1	152153915	152154020	DEL	104	0.537037
chr1	152225028	152225105	DEL	76	0.549383
chr1	152298030	152298031	INS	257	0.580247
chr1	154166659	154166764	DEL	104	0.450617
chr1	155013336	155013337	INS	748	0.946237
chr1	157655696	157655964	DEL	267	0.56
chr1	157879325	157879649	DEL	323	0.511494
chr1	158018969	158019026	DEL	56	0.810345
chr1	158034810	158037262	DEL	2451	0.810345
chr1	158815965	158816916	DEL	950	0.806452
chr1	160102320	160102637	DEL	316	0.795699
chr1	160122113	160122425	DEL	311	0.563218
chr1	160193293	160193385	DEL	91	0.67284
chr1	162463623	162463940	DEL	316	0.768817
chr1	162689574	162689906	DEL	331	0.66092
chr1	163552601	163552602	INS	103	0.580247
chr1	163552603	163552804	DEL	200	0.580247
chr1	163581188	163581189	INS	60	0.586667
chr1	165054582	165054583	INS	106	0.48
chr1	166450103	166450104	INS	63	0.768817
chr1	168910872	168911511	DEL	638	0.822581
chr1	169488827	169488828	INS	58	0.677419
chr1	169990251	169990568	DEL	316	0.763441
chr1	170793501	170793595	DEL	93	0.768817
chr1	171170912	171170975	DEL	62	0.693333
chr1	171293489	171293550	DEL	60	0.593333
chr1	173275758	173275839	DEL	80	0.741379
chr1	174476186	174476239	DEL	52	0.678161
chr1	174780915	174780916	INS	114	0.68
chr1	176957728	176957785	DEL	56	0.609195
chr1	177860321	177860386	DEL	64	0.860215
chr1	178333799	178334119	DEL	319	0.623457
chr1	180429462	180429463	INS	699	0.724138
chr1	180429463	180429687	DEL	223	0.704301
chr1	180433007	180433336	DEL	328	0.596774
chr1	180782118	180782119	INS	80	0.52
chr1	182065032	182065033	INS	181	0.977011
chr1	183359904	183363704	DEL	3799	0.897849
chr1	184162917	184163241	DEL	323	0.534483
chr1	184760873	184761213	DEL	339	0.574713
chr1	187815768	187816073	DEL	304	0.645161
chr1	188409506	188409507	INS	61	0.477011
chr1	189038640	189038641	INS	67	0.598765
chr1	189260113	189260450	DEL	336	0.752688
chr1	189379983	189380102	DEL	118	0.513333
chr1	190173753	190173754	INS	80	0.5
chr1	190214412	190214584	DEL	171	0.827957
chr1	191116169	191116239	DEL	69	0.865591
chr1	192204283	192204343	DEL	59	0.747126
chr1	192844951	192846906	DEL	1954	0.712644
chr1	194461290	194461459	DEL	168	0.715054
chr1	196088995	196213044	DUP	124049	0.553333
chr1	196091914	196091915	INS	57	0.517241
chr1	196175959	196176343	DEL	383	0.511494
chr1	196200711	196202843	DEL	2131	0.517241
chr1	198104528	198104821	DEL	292	0.924731
chr1	200516218	200516270	DEL	51	0.827586
chr1	201463891	201465195	DEL	1303	0.793103
chr1	201720201	201720202	INS	288	0.546667
chr1	203103187	203103921	DEL	733	0.897849
chr1	203274845	203274846	INS	87	0.758065
chr1	204868113	204868187	DEL	73	0.442529
chr1	205245671	205245672	INS	140	0.442529
chr1	205316636	205322547	DUP	5911	0.373563
chr1	205387484	205387652	DEL	167	0.827957
chr1	205788741	205788742	INS	57	0.424731
chr1	206384269	206385100	DEL	830	0.643678
chr1	206385101	206385102	INS	91	0.643678
chr1	206633926	206637528	DEL	3601	0.543011
chr1	210459292	210459293	INS	90	0.924731
chr1	211432699	211432764	DEL	64	0.55914
chr1	211713735	211713736	INS	85	0.494253
chr1	211970005	211970006	INS	85	0.521505
chr1	212783092	212784276	DEL	1183	0.426667
chr1	213836349	213836350	INS	335	0.68
chr1	214261399	214261400	INS	53	0.478495
chr1	218246521	218246623	DEL	101	0.592593
chr1	218637299	218637581	DEL	281	0.639785
chr1	219179334	219179335	INS	72	0.553333
chr1	219351386	219351707	DEL	320	0.44
chr1	220211447	220211506	DEL	58	0.602151
chr1	221035645	221035978	DEL	332	0.709677
chr1	221100989	221101315	DEL	325	0.591954
chr1	222185312	222185313	INS	77	0.471264
chr1	223567380	223567381	INS	245	0.517241
chr1	226602894	226603425	DEL	530	0.61828
chr1	227025311	227025624	DEL	312	0.806452
chr1	228202074	228202410	DEL	335	0.66
chr1	229655554	229655555	INS	79	0.672414
chr1	231116938	231116939	INS	54	0.626437
chr1	231697675	231697759	DEL	83	0.567901
chr1	231837591	231837902	DEL	310	0.688172
chr1	232025614	232025929	DEL	314	0.5
chr1	232145640	232145710	DEL	69	0.967742
chr1	233115858	233116183	DEL	324	0.603448
chr1	233212919	233214263	DEL	1343	0.736559
chr1	233841827	233842161	DEL	333	0.666667
chr1	234686137	234686231	DEL	93	0.518519
chr1	234983723	234983854	DEL	130	0.555556
chr1	238310304	238310369	DEL	64	0.983871
chr1	239055415	239055416	INS	283	0.724138
chr1	239384615	239384951	DEL	335	0.768817
chr1	239552607	239552701	DEL	93	0.517241
chr1	239776798	239776799	INS	84	0.528736
chr1	240063579	240063643	DEL	63	0.56
chr1	240434168	240434169	INS	123	0.568966
chr1	240608353	240608669	DEL	315	0.827957
chr1	240737754	240738084	DEL	329	0.822581
chr1	240834358	240834623	DEL	264	0.505747
chr1	242108935	242108936	INS	81	0.567901
chr1	242331698	242331699	INS	53	0.597701
chr1	244357940	244358075	DEL	134	0.401235
chr1	245654006	245654348	DEL	341	0.866667
chr1	245824783	245824957	DEL	173	0.518519
chr1	245900979	245901168	DEL	188	0.362069
chr1	246064815	246064891	DEL	75	0.695402
chr1	246839342	246839343	INS	82	0.643678
chr1	246844549	246847366	DEL	2816	0.650538
chr1	246907787	246907840	DEL	52	0.709677
chr1	246908446	246908551	DEL	104	0.709677
chr1	247362889	247362986	DEL	96	0.575269
chr1	247613889	247614347	DEL	457	0.729885
chr1	247788171	247788172	INS	84	0.827957
chr1	247889495	247889559	DEL	63	0.83871
chr10	387773	387774	INS	73	0.66129
chr10	395604	395848	DEL	243	0.603448
chr10	776577	776578	INS	74	0.489247
chr10	949569	949570	INS	52	0.784946
chr10	1007247	1007248	INS	78	0.609195
chr10	1008486	1008487	INS	64	0.759259
chr10	1012456	1012523	DEL	66	0.626437
chr10	1156358	1156551	DEL	192	0.426667
chr10	1226599	1226750	DEL	150	0.406667
chr10	1463075	1463804	DEL	728	0.593333
chr10	1495204	1495205	INS	107	0.643678
chr10	1558185	1558376	DEL	190	0.66129
chr10	1572819	1572872	DEL	52	0.56
chr10	1573809	1573914	DEL	104	0.566667
chr10	1574067	1574129	DEL	61	0.833333
chr10	1615548	1615916	DEL	367	0.5
chr10	1624885	1624886	INS	93	0.537037
chr10	1671685	1671791	DEL	105	0.633333
chr10	1865227	1865304	DEL	76	0.413793
chr10	2032794	2033110	DEL	315	0.54
chr10	2046723	2046826	DEL	102	0.654321
chr10	2176749	2176829	DEL	79	0.666667
chr10	2335629	2335958	DEL	328	0.693548
chr10	2359100	2359244	DEL	143	0.747312
chr10	2655864	2655865	INS	94	0.83871
chr10	3055015	3055142	DEL	126	0.58642
chr10	3206633	3206712	DEL	78	0.598765
chr10	3316839	3316901	DEL	61	0.561728
chr10	3683213	3683273	DEL	59	0.956989
chr10	3980305	3980306	INS	60	0.58642
chr10	5032576	5032652	DEL	75	0.555556
chr10	5652180	5652181	INS	79	0.632184
chr10	6127685	6127906	DEL	220	0.54321
chr10	6206707	6206785	DEL	77	0.784946
chr10	6369759	6375828	DEL	6068	0.801075
chr10	7629512	7629602	DEL	89	0.693548
chr10	7629940	7629941	INS	126	0.5
chr10	7752617	7752838	DEL	220	0.860215
chr10	8269503	8269734	DEL	230	0.736559
chr10	8564078	8564354	DEL	275	0.567901
chr10	9058595	9058656	DEL	60	0.698925
chr10	9399136	9399199	DEL	62	0.487654
chr10	9401119	9401176	DEL	56	0.493827
chr10	9488550	9494501	DEL	5950	0.854839
chr10	9724713	9724778	DEL	64	0.632184
chr10	11377957	11377958	INS	72	0.649425
chr10	11380844	11381071	DEL	226	0.58642
chr10	12530761	12533288	DEL	2526	0.580247
chr10	12535133	12535273	DEL	139	0.561728
chr10	12566587	12566970	DEL	382	0.46
chr10	12638318	12638644	DEL	325	0.752688
chr10	14508803	14509115	DEL	311	0.870968
chr10	14643297	14643389	DEL	91	0.670886
chr10	14722870	14722871	INS	65	0.524691
chr10	15355747	15355801	DEL	53	0.591954
chr10	15976970	15977300	DEL	329	0.735632
chr10	17689279	17690086	DEL	806	0.827957
chr10	17969871	17969991	DEL	119	0.715054
chr10	18233505	18234019	DEL	513	0.747126
chr10	19190635	19190703	DEL	67	0.5
chr10	19934546	19934862	DEL	315	0.833333
chr10	20045360	20045361	INS	96	0.777778
chr10	21345288	21345371	DEL	82	0.614943
chr10	21449560	21449739	DEL	178	0.764368
chr10	23366689	23366819	DEL	129	0.557471
chr10	25692905	25693235	DEL	329	0.602151
chr10	25917150	25917151	INS	118	0.849462
chr10	25921088	25921089	INS	70	0.849462
chr10	26344069	26344070	INS	108	0.88172
chr10	26588454	26588775	DEL	320	0.722222
chr10	26696894	26697078	DEL	183	0.632184
chr10	27473354	27473557	DEL	202	0.701149
chr10	27671408	27671730	DEL	321	0.574074
chr10	27783871	27784194	DEL	322	0.849462
chr10	29201488	29201489	INS	191	0.973118
chr10	29934414	29934415	INS	68	0.686667
chr10	30743315	30743658	DEL	342	0.844086
chr10	33761820	33761889	DEL	68	0.763441
chr10	34423990	34424315	DEL	324	0.522989
chr10	35332888	35333219	DEL	330	0.466667
chr10	36335579	36335901	DEL	321	0.646667
chr10	36770080	36770221	DEL	140	0.715054
chr10	37888954	37888955	INS	77	0.534483
chr10	38131552	38131553	INS	238	0.450617
chr10	38630096	38630172	DEL	75	0.512346
chr10	38653179	38653255	DEL	75	0.506173
chr10	38703924	38703925	INS	54	0.401235
chr10	38844895	38844896	INS	95	0.524691
chr10	38930124	38930185	DEL	60	0.513333
chr10	39350744	39350917	DEL	172	0.555556
chr10	39416526	39416731	DEL	204	0.641975
chr10	39636872	39637210	DEL	337	0.406667
chr10	41785177	41785517	DEL	339	0.38172
chr10	41787221	41788580	DEL	1358	0.6
chr10	41791628	41791969	DEL	340	0.408046
chr10	41795699	41800794	DEL	5094	0.603448
chr10	41854949	41856309	DEL	1359	0.713333
chr10	41877052	41878071	DEL	1018	0.623377
chr10	41881949	41883647	DEL	1697	0.5
chr10	41892581	41893602	DEL	1020	0.853333
chr10	42040680	42041021	DEL	340	0.543011
chr10	42081886	42081942	DEL	55	0.591954
chr10	42083647	42083723	DEL	75	0.646667
chr10	42155110	42155111	INS	80	0.62069
chr10	42182511	42182512	INS	64	0.54321
chr10	42183609	42185407	DEL	1797	0.566667
chr10	42206688	42206744	DEL	55	0.64
chr10	42223438	42223509	DEL	70	0.691358
chr10	42278442	42278508	DEL	65	0.376543
chr10	42353107	42353108	INS	65	0.609195
chr10	42353501	42353572	DEL	70	0.597701
chr10	42365793	42365878	DEL	84	0.469136
chr10	42887122	42888355	DEL	1232	0.48
chr10	42901821	42903700	DEL	1878	0.546667
chr10	43042936	43042937	INS	62	0.688172
chr10	43053409	43053671	DEL	261	0.666667
chr10	43083641	43098881	DEL	15239	0.55914
chr10	43184165	43184231	DEL	65	0.629032
chr10	45286708	45287017	DEL	308	0.758065
chr10	45706235	45706367	DEL	131	0.849462
chr10	45809403	45809673	DEL	269	0.83871
chr10	47749116	47749475	DEL	358	0.548387
chr10	47764993	47765296	DEL	302	0.704301
chr10	48220638	48220639	INS	88	0.735632
chr10	50591522	50591584	DEL	61	0.660494
chr10	51327228	51327581	DEL	352	0.795699
chr10	52298278	52298674	DEL	395	0.506667
chr10	53374371	53374464	DEL	92	0.567901
chr10	53482926	53483249	DEL	322	0.892473
chr10	53553844	53554169	DEL	324	0.58642
chr10	53676761	53676941	DEL	179	0.736559
chr10	54813236	54813237	INS	57	0.758065
chr10	54814774	54814863	DEL	88	0.833333
chr10	55271226	55271557	DEL	330	0.557471
chr10	55754740	55755078	DEL	337	0.903226
chr10	55788355	55788356	INS	125	0.833333
chr10	55992723	55993040	DEL	316	0.586667
chr10	57637098	57641441	DEL	4342	0.62963
chr10	58110439	58110787	DEL	347	0.506667
chr10	61081165	61081268	DEL	102	0.534483
chr10	61081451	61081570	DEL	118	0.522989
chr10	61220043	61220331	DEL	287	0.645161
chr10	63137639	63137718	DEL	78	0.596774
chr10	63535281	63535409	DEL	127	0.465517
chr10	63608960	63609291	DEL	330	0.729885
chr10	64668584	64668585	INS	96	0.52
chr10	64669563	64669640	DEL	76	0.5
chr10	64935155	64935300	DEL	144	0.66129
chr10	65935127	65935441	DEL	313	0.568966
chr10	67152645	67152646	INS	247	0.436782
chr10	68052830	68058905	DEL	6074	0.94086
chr10	72366806	72366807	INS	120	0.546667
chr10	72740199	72740327	DEL	127	0.768817
chr10	77455424	77460413	DEL	4988	0.518519
chr10	77485546	77485653	DEL	106	0.506667
chr10	77687903	77688031	DEL	127	0.512346
chr10	78561533	78561860	DEL	326	0.806452
chr10	80201779	80202360	DEL	580	0.768817
chr10	81413010	81413221	DEL	210	0.61828
chr10	81496944	81499698	DEL	2753	0.833333
chr10	81636626	81638326	DEL	1699	0.844086
chr10	83514459	83514609	DEL	149	0.908602
chr10	84092550	84097613	DEL	5062	0.678161
chr10	84785435	84785645	DEL	209	0.436782
chr10	85036060	85036379	DEL	318	0.672043
chr10	88399637	88400391	DEL	753	0.561728
chr10	88497503	88497831	DEL	327	0.677419
chr10	89240881	89240882	INS	67	0.752688
chr10	91527948	91528059	DEL	110	0.655172
chr10	92624286	92624287	INS	175	0.633333
chr10	98228723	98229039	DEL	315	0.45679
chr10	98599003	98599004	INS	73	0.493333
chr10	98781024	98781249	DEL	224	0.688172
chr10	98924876	98924877	INS	113	0.709677
chr10	100722706	100722707	INS	225	0.574074
chr10	100977489	100977719	DEL	229	0.611111
chr10	103654158	103654484	DEL	325	0.712644
chr10	111295590	111295591	INS	74	0.804598
chr10	112147276	112147329	DEL	52	0.574713
chr10	113817142	113817601	DEL	458	0.68
chr10	114381791	114382125	DEL	333	0.865591
chr10	114539164	114539219	DEL	54	0.567901
chr10	114673109	114673110	INS	223	0.564516
chr10	114834190	114834266	DEL	75	0.758621
chr10	116140820	116140821	INS	319	0.655914
chr10	116838333	116838662	DEL	328	0.752688
chr10	118465125	118465309	DEL	183	0.637931
chr10	119401095	119401206	DEL	110	0.965517
chr10	119580410	119580490	DEL	79	0.849462
chr10	119738541	119738716	DEL	174	0.553333
chr10	120182663	120183097	DEL	433	0.774194
chr10	120322896	120322897	INS	74	0.67284
chr10	121838125	121838126	INS	292	0.494253
chr10	122807933	122808096	DEL	162	0.854839
chr10	123353595	123353596	INS	393	0.801075
chr10	124496204	124496266	DEL	61	0.623457
chr10	125258718	125258822	DEL	103	0.870968
chr10	126109500	126109632	DEL	131	0.475309
chr10	128291114	128291647	DEL	532	0.551724
chr10	128470125	128470435	DEL	309	0.833333
chr10	129262816	129262817	INS	51	0.801075
chr10	129281522	129281523	INS	220	0.88172
chr10	129508299	129508901	DEL	601	0.537037
chr10	129963929	129963930	INS	403	0.66129
chr10	130447405	130447474	DEL	68	0.865591
chr10	130545730	130545731	INS	55	0.623656
chr10	130941188	130941250	DEL	61	0.784946
chr10	131025576	131025577	INS	98	0.632184
chr10	131276361	131276687	DEL	325	0.752688
chr10	131503499	131503500	INS	145	0.493333
chr10	131719600	131720161	DEL	560	0.432099
chr10	131849002	131849003	INS	66	0.752688
chr10	131899062	131899140	DEL	77	0.822581
chr10	131995247	131995598	DEL	350	0.649425
chr10	132043438	132043502	DEL	63	0.517241
chr10	132331596	132331658	DEL	61	0.553333
chr10	132423796	132423797	INS	120	0.567901
chr10	132742423	132742424	INS	111	0.806452
chr10	132753912	132754427	DEL	514	0.773333
chr10	132757563	132757736	DEL	172	0.614943
chr10	132856284	132857203	DEL	918	0.775862
chr10	132859072	132859073	INS	63	0.758621
chr10	132889577	132889923	DEL	345	0.758065
chr10	132892288	132892289	INS	78	0.666667
chr10	132898982	132899242	DEL	259	0.683908
chr10	132987946	132987947	INS	53	0.66
chr10	133012149	133012150	INS	53	0.617284
chr10	133203690	133203691	INS	55	0.697531
chr10	133332799	133333408	DEL	608	0.93956
chr10	133346481	133346574	DEL	92	0.870588
chr10	133367240	133367926	DEL	685	0.662921
chr10	133527481	133527482	INS	118	0.604938
chr10	133691026	133691082	DEL	55	0.67284
chr10	133692443	133692560	DEL	116	0.66092
chr10	133698725	133698726	INS	52	0.983871
chr10	133707099	133707100	INS	76	0.775862
chr10	133707429	133707430	INS	240	0.763441
chr10	133748506	133748627	DEL	120	0.626667
chr10	133914741	133914742	INS	102	0.930108
chr10	133935387	133935456	DEL	68	0.626437
chr10	134003867	134003948	DEL	80	0.598765
chr10	134108223	134108275	DEL	51	0.48
chr10	134173919	134174038	DEL	118	0.58642
chr10	134178994	134178995	INS	90	0.604938
chr11	23579	23644	DEL	64	0.586022
chr11	404429	404430	INS	62	0.763441
chr11	470412	470592	DEL	179	0.813187
chr11	514685	514686	INS	108	0.706897
chr11	520579	521404	DEL	824	0.715054
chr11	531699	531700	INS	144	0.532258
chr11	537508	537509	INS	112	0.724138
chr11	542977	543050	DEL	72	0.851648
chr11	577330	577779	DEL	448	0.626667
chr11	638664	638665	INS	131	0.591398
chr11	688609	688754	DEL	144	0.632184
chr11	728094	728549	DEL	454	0.646667
chr11	884520	884521	INS	84	0.611765
chr11	885168	885169	INS	76	0.714286
chr11	910747	910804	DEL	56	0.452941
chr11	930992	931077	DEL	84	0.527473
chr11	1012778	1012779	INS	106	0.591398
chr11	1016213	1020452	DEL	4238	0.568966
chr11	1068332	1068433	DEL	100	0.849462
chr11	1167608	1167609	INS	69	0.587912
chr11	1326851	1326911	DEL	59	0.741935
chr11	1666114	1666175	DEL	60	0.653333
chr11	1680553	1682927	DEL	2373	0.686667
chr11	1725693	1726275	DEL	581	0.66129
chr11	1907254	1907375	DEL	120	0.716049
chr11	1978907	1978908	INS	183	0.747312
chr11	2029527	2029528	INS	179	0.551724
chr11	2945793	2945794	INS	73	0.677419
chr11	3194087	3194147	DEL	59	0.58
chr11	3306933	3307138	DEL	204	0.649425
chr11	5162382	5164895	DEL	2512	0.810345
chr11	5173355	5173536	DEL	180	0.66092
chr11	5921802	5922124	DEL	321	0.574713
chr11	7129940	7130289	DEL	348	0.450617
chr11	7827149	7828825	DEL	1675	0.709677
chr11	7913088	7923737	DEL	10648	0.806452
chr11	8242783	8242853	DEL	69	0.833333
chr11	8257528	8257950	DEL	421	0.623656
chr11	8282670	8282723	DEL	52	0.635802
chr11	8505981	8506316	DEL	334	0.811828
chr11	9131188	9131851	DEL	662	0.822581
chr11	9394349	9394684	DEL	334	0.811828
chr11	9790316	9790908	DEL	591	0.573333
chr11	10355673	10356779	DEL	1105	0.557471
chr11	10700454	10700770	DEL	315	0.637931
chr11	12016085	12018844	DEL	2758	0.833333
chr11	12222856	12223182	DEL	325	0.701149
chr11	13014711	13014989	DEL	277	0.522989
chr11	13883697	13884037	DEL	339	0.548387
chr11	15455137	15456710	DEL	1572	0.612903
chr11	15952364	15952441	DEL	76	0.770115
chr11	17004804	17004805	INS	254	0.613333
chr11	17071768	17072194	DEL	425	0.741935
chr11	17624710	17624891	DEL	180	0.530864
chr11	17809110	17809183	DEL	72	0.725806
chr11	18239150	18239238	DEL	87	0.613333
chr11	21096209	21096282	DEL	72	0.704301
chr11	22361772	22361773	INS	124	0.759259
chr11	22389896	22389999	DEL	102	0.666667
chr11	22436755	22436818	DEL	62	0.641975
chr11	22511838	22512148	DEL	309	0.811828
chr11	22533231	22533232	INS	116	0.811828
chr11	23111460	23111461	INS	53	0.892473
chr11	23674322	23674660	DEL	337	0.908602
chr11	23963485	23963486	INS	144	0.781609
chr11	25059905	25059974	DEL	68	0.633333
chr11	25177630	25177744	DEL	113	0.561728
chr11	25252905	25253232	DEL	326	0.771605
chr11	25550670	25550892	DEL	221	0.612903
chr11	25553385	25553480	DEL	94	0.612903
chr11	25571369	25571431	DEL	61	0.775862
chr11	25891878	25892015	DEL	136	0.806452
chr11	26148314	26148548	DEL	233	0.569892
chr11	26271114	26271175	DEL	60	0.741379
chr11	26310145	26310451	DEL	305	0.989247
chr11	27426822	27427156	DEL	333	0.591398
chr11	28571612	28571818	DEL	205	0.549383
chr11	30081027	30081028	INS	888	0.726667
chr11	30345686	30345751	DEL	64	0.602151
chr11	30619665	30619726	DEL	60	0.574713
chr11	33783908	33785575	DEL	1666	0.555556
chr11	34163939	34163998	DEL	58	0.72043
chr11	34164286	34164287	INS	166	0.666667
chr11	34542539	34542633	DEL	93	0.44
chr11	35542248	35542751	DEL	502	0.513333
chr11	36284475	36284476	INS	87	0.648148
chr11	36284961	36284962	INS	78	0.666667
chr11	36395147	36395495	DEL	347	0.876344
chr11	36899457	36899770	DEL	312	0.774194
chr11	37492181	37492182	INS	52	0.537975
chr11	37492620	37492621	INS	53	0.54321
chr11	40100194	40100511	DEL	316	0.817204
chr11	40619049	40619364	DEL	314	0.632184
chr11	41433110	41433111	INS	78	0.521505
chr11	44011290	44011607	DEL	316	0.682796
chr11	44043420	44043727	DEL	306	0.626437
chr11	44657287	44657288	INS	51	0.786667
chr11	45268732	45268926	DEL	193	0.58
chr11	45971425	45971426	INS	55	0.67284
chr11	46170681	46171029	DEL	347	0.513333
chr11	47253985	47253986	INS	176	0.693548
chr11	47456413	47456467	DEL	53	0.715054
chr11	48031062	48031590	DEL	527	0.537037
chr11	48047339	48047746	DEL	406	0.967742
chr11	48268051	48268363	DEL	311	0.83871
chr11	48526792	48526793	INS	167	0.870968
chr11	48594852	48595144	DEL	291	0.870968
chr11	48748943	48752368	DEL	3424	0.612903
chr11	48757414	48757415	INS	76	0.612903
chr11	48828256	48828257	INS	211	0.902299
chr11	48881383	48883600	DEL	2216	0.614943
chr11	49075279	49075591	DEL	311	0.602151
chr11	49082241	49082242	INS	171	0.83871
chr11	49099293	49099965	DEL	671	0.612903
chr11	49438276	49438606	DEL	329	0.876344
chr11	49873024	49873178	DEL	153	0.725806
chr11	50039356	50039357	INS	536	0.648148
chr11	50364852	50364853	INS	119	0.693548
chr11	50477854	50477927	DEL	72	0.580645
chr11	50479694	50479791	DEL	96	0.564516
chr11	50858030	50858887	DEL	856	0.510753
chr11	50892825	50892997	DEL	171	0.66129
chr11	50935189	50937929	DEL	2739	0.532258
chr11	50986324	50986325	INS	171	0.682796
chr11	51027653	51029527	DEL	1873	0.66129
chr11	54452727	54453070	DEL	342	0.594937
chr11	54692289	54714093	DEL	21803	0.557471
chr11	54901433	54901434	INS	171	0.72043
chr11	54995342	54995343	INS	170	0.688172
chr11	56873297	56873558	DEL	260	0.946237
chr11	58089258	58089324	DEL	65	0.66
chr11	58144793	58145119	DEL	325	0.430108
chr11	58347284	58347481	DEL	196	0.629032
chr11	58352780	58354280	DEL	1499	0.629032
chr11	58422114	58422115	INS	95	0.685185
chr11	60477066	60477382	DEL	315	0.856322
chr11	60485035	60485036	INS	80	0.856322
chr11	60941972	60941973	INS	121	0.623457
chr11	62166884	62166885	INS	298	0.639785
chr11	62375772	62375877	DEL	104	0.629032
chr11	64151567	64151704	DEL	136	0.763441
chr11	65591067	65591068	INS	78	0.801075
chr11	65730140	65730455	DEL	314	0.566667
chr11	67826806	67832869	DEL	6062	0.517241
chr11	67838899	67841227	DEL	2327	0.511494
chr11	69515317	69515398	DEL	80	0.5
chr11	70760417	70760473	DEL	55	0.526667
chr11	71063989	71063990	INS	96	0.58642
chr11	73928121	73928309	DEL	187	0.537037
chr11	74363424	74363771	DEL	346	0.580645
chr11	75339544	75339545	INS	78	0.946237
chr11	75471569	75471570	INS	123	0.724138
chr11	76531828	76532030	DEL	201	0.811828
chr11	76649803	76649874	DEL	70	0.897849
chr11	77028419	77028420	INS	179	0.611111
chr11	78812747	78812748	INS	74	0.609195
chr11	79061407	79061408	INS	56	0.956989
chr11	79434284	79434401	DEL	116	0.709677
chr11	81371936	81372051	DEL	114	0.511494
chr11	84948724	84948928	DEL	203	0.66129
chr11	87095901	87096069	DEL	167	0.598765
chr11	87209257	87209312	DEL	54	0.688172
chr11	87396648	87397215	DEL	566	0.639785
chr11	87972344	87972409	DEL	64	0.586022
chr11	88104354	88104693	DEL	338	0.580645
chr11	88108304	88108599	DEL	294	0.561728
chr11	90119425	90119765	DEL	339	0.41358
chr11	90382375	90383317	DEL	941	0.633333
chr11	92439623	92439928	DEL	304	0.52
chr11	93862360	93865012	DEL	2651	0.549383
chr11	96276224	96276225	INS	1470	0.876543
chr11	96800872	96801433	DEL	560	0.530864
chr11	98429434	98429515	DEL	80	0.52
chr11	98617440	98617496	DEL	55	0.715054
chr11	98983752	98984009	DEL	256	0.973118
chr11	100919835	100920161	DEL	325	0.741935
chr11	101187471	101187630	DEL	158	0.58046
chr11	102603304	102603624	DEL	319	0.564516
chr11	103334117	103334442	DEL	324	0.45977
chr11	103925399	103925728	DEL	328	0.55914
chr11	104143665	104144010	DEL	344	0.677419
chr11	104198460	104198670	DEL	209	0.733333
chr11	104278313	104278636	DEL	322	0.569892
chr11	104401250	104406727	DEL	5476	0.715054
chr11	105528416	105528417	INS	197	0.475309
chr11	105969579	105969910	DEL	330	0.731183
chr11	106669589	106669653	DEL	63	0.557471
chr11	108722550	108725372	DEL	2821	0.865591
chr11	109059811	109059942	DEL	130	0.973118
chr11	109196493	109196494	INS	82	0.607527
chr11	110070527	110070528	INS	75	0.513333
chr11	110416064	110416382	DEL	317	0.892473
chr11	112342071	112342210	DEL	138	0.666667
chr11	114644028	114644094	DEL	65	0.486667
chr11	116144042	116144739	DEL	696	0.58642
chr11	118371934	118371935	INS	66	0.534483
chr11	118715559	118715560	INS	134	0.709877
chr11	118895990	118896155	DEL	164	0.666667
chr11	118968136	118968279	DEL	142	0.72043
chr11	120106625	120106700	DEL	74	0.677419
chr11	121045147	121045208	DEL	60	0.924731
chr11	121138418	121138675	DEL	256	0.77957
chr11	122435988	122436296	DEL	307	0.731183
chr11	123018106	123018107	INS	129	0.580247
chr11	123156949	123156950	INS	54	0.913978
chr11	123387750	123387751	INS	56	0.693548
chr11	123738186	123738187	INS	96	0.758065
chr11	124279133	124279985	DEL	851	0.564516
chr11	125211892	125212183	DEL	290	0.469136
chr11	125878133	125878134	INS	154	0.822581
chr11	127619391	127619526	DEL	134	0.553763
chr11	128845984	128845985	INS	692	0.784946
chr11	129180283	129180867	DEL	583	0.887097
chr11	129925356	129925674	DEL	317	0.634409
chr11	131635146	131635147	INS	54	0.56
chr11	132252239	132252554	DEL	314	0.486667
chr11	132596877	132596878	INS	104	0.602151
chr11	133060107	133060108	INS	72	0.735632
chr11	133691593	133691648	DEL	54	0.655172
chr11	134112414	134112415	INS	52	0.890805
chr11	134135885	134135886	INS	633	0.72
chr11	134136072	134136073	INS	60	0.655172
chr11	134136804	134136805	INS	60	0.66092
chr11	134208192	134208193	INS	293	0.686667
chr11	134499861	134500092	DEL	230	0.666667
chr11	134525747	134525852	DEL	104	0.611111
chr11	134528805	134528900	DEL	94	0.569892
chr11	134531820	134532019	DEL	198	0.650538
chr11	134565871	134565872	INS	62	0.506667
chr11	134681433	134681496	DEL	62	0.626582
chr11	134699392	134700587	DEL	1194	0.606667
chr11	134748671	134748837	DEL	165	0.526667
chr11	134804490	134804491	INS	74	0.548387
chr11	134875622	134875695	DEL	72	0.725806
chr11	134897960	134899686	DEL	1725	0.716867
chr12	430692	430693	INS	79	0.688172
chr12	525731	525971	DEL	239	0.475309
chr12	586702	586703	INS	248	0.567901
chr12	1751467	1751468	INS	315	0.68
chr12	2353809	2353810	INS	133	0.967742
chr12	2725590	2725643	DEL	52	0.653333
chr12	2891866	2891867	INS	55	0.586022
chr12	3275389	3275390	INS	76	0.493827
chr12	5624056	5624249	DEL	192	0.725806
chr12	5645550	5646001	DEL	450	0.683908
chr12	5666150	5666225	DEL	74	0.573333
chr12	5820282	5820283	INS	105	0.698925
chr12	6807793	6807794	INS	256	0.682796
chr12	7097639	7098026	DEL	386	0.888889
chr12	7694483	7694484	INS	124	0.649425
chr12	8608369	8608370	INS	116	0.897849
chr12	9198825	9199139	DEL	313	0.650538
chr12	9888604	9888850	DEL	245	0.511494
chr12	10462475	10462476	INS	87	0.672043
chr12	10694222	10694223	INS	55	0.526882
chr12	10788485	10788737	DEL	251	0.55914
chr12	10899445	10899756	DEL	310	0.774194
chr12	10941784	10941983	DEL	198	0.44086
chr12	10975581	10975582	INS	314	0.68
chr12	11004870	11004871	INS	53	0.569892
chr12	11742773	11743512	DEL	738	0.567901
chr12	12283011	12283012	INS	99	0.566667
chr12	12885141	12885646	DEL	504	0.62069
chr12	13267012	13273091	DEL	6078	0.546667
chr12	13663117	13663118	INS	97	0.637931
chr12	13895265	13895580	DEL	314	0.672414
chr12	13981312	13981368	DEL	55	0.574713
chr12	14045352	14045353	INS	193	0.764045
chr12	16144524	16145684	DEL	1159	0.533333
chr12	17551084	17551085	INS	246	0.426667
chr12	17617416	17617645	DEL	228	0.876344
chr12	20634000	20634320	DEL	319	0.617284
chr12	21360709	21361032	DEL	322	0.967742
chr12	21541204	21541271	DEL	66	0.854839
chr12	23658419	23658420	INS	567	0.919355
chr12	24707125	24707179	DEL	53	0.645161
chr12	24976973	24977469	DEL	495	0.473333
chr12	25303747	25304260	DEL	512	0.913978
chr12	25323898	25323899	INS	61	0.526882
chr12	26656320	26656376	DEL	55	0.598765
chr12	27993393	27993736	DEL	342	0.752688
chr12	28136445	28136755	DEL	309	0.784946
chr12	28522761	28522844	DEL	82	0.567901
chr12	28543062	28543145	DEL	82	0.5
chr12	30029872	30029965	DEL	92	0.568966
chr12	30076904	30077023	DEL	118	0.551724
chr12	30139150	30139479	DEL	328	0.596774
chr12	30995706	30996981	DEL	1274	0.533333
chr12	30999348	30999428	DEL	79	0.433333
chr12	33037965	33044047	DEL	6081	0.790323
chr12	33571468	33571469	INS	215	0.62069
chr12	33735411	33741769	DEL	6357	0.673333
chr12	34311502	34311593	DEL	90	0.603448
chr12	34357245	34357387	DEL	141	0.614943
chr12	34558563	34559077	DEL	513	0.611111
chr12	34609375	34619906	DEL	10530	0.62
chr12	37254272	37254273	INS	171	0.678161
chr12	37377010	37377011	INS	73	0.683908
chr12	37563918	37564261	DEL	342	0.685185
chr12	37632265	37632266	INS	854	0.626437
chr12	37632551	37632552	INS	509	0.691358
chr12	37648751	37648752	INS	171	0.703704
chr12	37787253	37787336	DEL	82	0.678161
chr12	37866687	37866890	DEL	202	0.683908
chr12	37918427	37918525	DEL	97	0.54
chr12	37928168	37928169	INS	172	0.709877
chr12	38934241	38934546	DEL	304	0.715054
chr12	38940563	38940564	INS	339	0.806667
chr12	38942368	38942457	DEL	88	0.715054
chr12	40441805	40441956	DEL	150	0.512346
chr12	40443739	40443800	DEL	60	0.5
chr12	41322189	41322278	DEL	88	0.844086
chr12	43283171	43283504	DEL	332	0.632184
chr12	43483594	43484674	DEL	1079	0.426667
chr12	43644078	43644079	INS	127	0.586667
chr12	43704124	43704447	DEL	322	0.88172
chr12	45468053	45474839	DEL	6785	0.679012
chr12	45513258	45513345	DEL	86	0.586667
chr12	46935035	46936082	DEL	1046	0.637931
chr12	47297711	47298053	DEL	341	0.88172
chr12	47594828	47594903	DEL	74	0.528736
chr12	48804579	48804707	DEL	127	0.666667
chr12	49328740	49328800	DEL	59	0.77957
chr12	49840600	49840601	INS	108	0.771605
chr12	50315129	50315130	INS	108	0.747126
chr12	58946207	58953257	DEL	7049	0.666667
chr12	58967083	58967084	INS	325	0.867816
chr12	58974317	58974640	DEL	322	0.833333
chr12	59003319	59003634	DEL	314	0.844086
chr12	59529321	59529449	DEL	127	0.873563
chr12	60256482	60256807	DEL	324	0.511494
chr12	61034520	61039242	DEL	4721	0.66129
chr12	61122088	61122286	DEL	197	0.66129
chr12	61288555	61288890	DEL	334	0.483871
chr12	61423273	61423589	DEL	315	0.677419
chr12	63531620	63531621	INS	227	0.641975
chr12	63534841	63534842	INS	92	0.598765
chr12	63665398	63665518	DEL	119	0.635802
chr12	63687026	63687103	DEL	76	0.5
chr12	64008474	64008563	DEL	88	0.55914
chr12	64182843	64182844	INS	85	0.62963
chr12	64720063	64720064	INS	176	0.506173
chr12	65106731	65106732	INS	52	0.648148
chr12	65173804	65173877	DEL	72	0.613333
chr12	66113361	66115605	DEL	2243	0.593333
chr12	66264277	66264278	INS	76	0.77957
chr12	67958032	67958033	INS	74	0.790323
chr12	69707647	69707980	DEL	332	0.88172
chr12	70180510	70183192	DEL	2681	0.655914
chr12	71114722	71114782	DEL	59	0.593333
chr12	71119483	71119982	DEL	498	0.701149
chr12	72307325	72307326	INS	151	0.569892
chr12	72321806	72321807	INS	53	0.596774
chr12	72792215	72792345	DEL	129	0.72043
chr12	72821684	72823959	DEL	2274	0.822581
chr12	72973081	72973162	DEL	80	0.537634
chr12	75408068	75408213	DEL	144	0.773333
chr12	77423087	77423088	INS	102	0.908046
chr12	77960194	77960370	DEL	175	0.493333
chr12	77968068	77968475	DEL	406	0.704301
chr12	78584062	78584374	DEL	311	0.703704
chr12	78782746	78782747	INS	272	0.770115
chr12	78783194	78783195	INS	68	0.736559
chr12	80784643	80784779	DEL	135	0.591398
chr12	82579967	82579968	INS	264	0.978495
chr12	82582988	82583328	DEL	339	0.978495
chr12	83627331	83627646	DEL	314	0.518519
chr12	84199653	84199705	DEL	51	0.54023
chr12	84549780	84550737	DEL	956	0.747312
chr12	85091875	85092663	DEL	787	0.768817
chr12	85759008	85759332	DEL	323	0.736559
chr12	86110514	86110836	DEL	321	0.701149
chr12	86276953	86277073	DEL	119	0.752874
chr12	87082027	87082524	DEL	496	0.612903
chr12	87467351	87467558	DEL	206	0.641975
chr12	88682748	88682749	INS	205	0.833333
chr12	92894158	92897505	DEL	3346	0.648148
chr12	94848988	94849208	DEL	219	0.678161
chr12	94973937	94974074	DEL	136	0.5
chr12	95634233	95634330	DEL	96	0.546667
chr12	95883932	95883985	DEL	52	0.551724
chr12	97091188	97091271	DEL	82	0.967742
chr12	97281216	97281285	DEL	68	0.52
chr12	97594984	97595045	DEL	60	0.774194
chr12	99361142	99361330	DEL	187	0.892473
chr12	101018276	101018601	DEL	324	0.643678
chr12	103467865	103468026	DEL	160	0.5
chr12	103729886	103729887	INS	82	0.612903
chr12	105006117	105006427	DEL	309	0.752874
chr12	106235427	106235704	DEL	276	0.530864
chr12	106460479	106460803	DEL	323	0.752688
chr12	107772946	107773600	DEL	653	0.613333
chr12	108332085	108332168	DEL	82	0.688172
chr12	108332373	108332958	DEL	584	0.688172
chr12	108549996	108550659	DEL	662	0.774194
chr12	108869929	108869988	DEL	58	0.978495
chr12	109843453	109843686	DEL	232	0.641975
chr12	111236541	111236941	DEL	399	0.591954
chr12	112810188	112810263	DEL	74	0.736559
chr12	114805516	114806494	DEL	977	0.795699
chr12	115090880	115090991	DEL	110	0.567901
chr12	115621179	115621254	DEL	74	0.736559
chr12	117357649	117363768	DEL	6118	0.666667
chr12	118668490	118668637	DEL	146	0.561728
chr12	119555036	119555089	DEL	52	0.858025
chr12	121990185	121990186	INS	436	0.54321
chr12	122120117	122120201	DEL	83	0.563218
chr12	122233527	122233528	INS	82	0.402299
chr12	122458699	122458753	DEL	53	0.553763
chr12	123752088	123752089	INS	80	0.573333
chr12	124074833	124075143	DEL	309	0.930108
chr12	124091210	124091211	INS	51	0.930108
chr12	124855295	124855296	INS	310	0.747126
chr12	124953982	124954078	DEL	95	0.586667
chr12	125542760	125542761	INS	56	0.563218
chr12	125834103	125834173	DEL	69	0.632184
chr12	126736014	126736179	DEL	164	0.849462
chr12	126892869	126892955	DEL	85	0.746667
chr12	127012203	127012277	DEL	73	0.77957
chr12	127317380	127317381	INS	62	0.951613
chr12	127487647	127487700	DEL	52	0.48
chr12	127505353	127505467	DEL	113	0.54023
chr12	127515336	127515454	DEL	117	0.724138
chr12	127515980	127516373	DEL	392	0.735632
chr12	128688854	128688929	DEL	74	0.672043
chr12	128876645	128876755	DEL	109	0.493333
chr12	129388144	129388460	DEL	315	0.510753
chr12	129670486	129670640	DEL	153	0.626667
chr12	129830861	129830914	DEL	52	0.844086
chr12	130375401	130375949	DEL	547	0.58642
chr12	130521217	130521283	DEL	65	0.654321
chr12	130698297	130698768	DEL	470	0.52
chr12	130705597	130705598	INS	58	0.655914
chr12	130978738	130979049	DEL	310	0.822581
chr12	131059304	131059500	DEL	195	0.72
chr12	131107575	131107696	DEL	120	0.486667
chr12	131110923	131110924	INS	80	0.645161
chr12	131147204	131147257	DEL	52	0.444444
chr12	131360065	131360118	DEL	52	0.533333
chr12	131660953	131661275	DEL	321	0.774194
chr12	132344185	132344186	INS	60	0.764368
chr12	132396671	132396672	INS	57	0.566667
chr12	132431236	132431323	DEL	86	0.546667
chr12	132431553	132431640	DEL	86	0.553333
chr12	132444835	132444836	INS	76	0.573333
chr12	132463218	132463283	DEL	64	0.553763
chr12	132780261	132780262	INS	63	0.506667
chr12	132925498	132925499	INS	53	0.715054
chr12	132947498	132947499	INS	81	0.784946
chr13	5376871	5376872	INS	144	0.417722
chr13	5393704	5393705	INS	336	0.433333
chr13	5553328	5553467	DEL	138	0.575269
chr13	5714596	5714658	DEL	61	0.403226
chr13	10369124	10369210	DEL	85	0.382716
chr13	10416879	10416880	INS	245	0.592593
chr13	10416940	10416941	INS	175	0.37931
chr13	10651662	10652079	DEL	416	0.814815
chr13	10726636	10726637	INS	65	0.66092
chr13	10735400	10735401	INS	683	0.395062
chr13	10745780	10746575	DEL	794	0.401235
chr13	10812423	10812424	INS	536	0.817204
chr13	12975325	12975326	INS	170	0.882716
chr13	13223002	13223358	DEL	355	0.546667
chr13	13517960	13518260	DEL	299	0.594118
chr13	13698506	13698616	DEL	109	0.847059
chr13	13787342	13787343	INS	62	0.522989
chr13	17515570	17515755	DEL	184	0.493333
chr13	18226448	18226787	DEL	338	0.473118
chr13	18975525	18975624	DEL	98	0.983516
chr13	20349833	20350157	DEL	323	0.870968
chr13	20513709	20513999	DEL	289	0.56
chr13	20518707	20519550	DEL	842	0.573333
chr13	20533244	20533333	DEL	88	0.473333
chr13	21112537	21112756	DEL	218	0.654321
chr13	22112687	22114729	DEL	2041	0.758065
chr13	22295354	22295681	DEL	326	0.860215
chr13	23115101	23115441	DEL	339	0.801075
chr13	23343836	23344151	DEL	314	0.522989
chr13	23730380	23730944	DEL	563	0.528736
chr13	23803962	23803963	INS	263	0.784946
chr13	24179128	24179245	DEL	116	0.604938
chr13	26128067	26128979	DEL	911	0.569892
chr13	28188028	28188352	DEL	323	0.646667
chr13	28214239	28214240	INS	67	0.505747
chr13	28864285	28870305	DEL	6019	0.530864
chr13	30288493	30289656	DEL	1162	0.551724
chr13	30540918	30541062	DEL	143	0.849462
chr13	30612690	30612762	DEL	71	0.64
chr13	31349132	31349456	DEL	323	0.833333
chr13	35452154	35452246	DEL	91	0.613333
chr13	35579782	35579783	INS	60	0.98
chr13	37105160	37105236	DEL	75	0.876344
chr13	38672723	38673042	DEL	318	0.569892
chr13	38725883	38725951	DEL	67	0.58046
chr13	39897254	39897255	INS	167	0.444444
chr13	40098671	40098724	DEL	52	0.753086
chr13	40647117	40647200	DEL	82	0.709677
chr13	41216665	41216980	DEL	314	0.672414
chr13	44072205	44072535	DEL	329	0.967742
chr13	45940242	45940243	INS	70	0.643678
chr13	46336593	46336908	DEL	314	0.790323
chr13	46928445	46928446	INS	114	0.653333
chr13	46933001	46933002	INS	65	0.66129
chr13	49105530	49107195	DEL	1664	0.574713
chr13	49682616	49682675	DEL	58	0.892473
chr13	50401708	50401709	INS	117	0.548387
chr13	50563615	50563616	INS	163	0.563218
chr13	52544236	52544309	DEL	72	0.506667
chr13	54276152	54276356	DEL	203	0.666667
chr13	55008362	55008363	INS	196	0.833333
chr13	56086665	56086741	DEL	75	0.72043
chr13	56961379	56961488	DEL	108	0.66
chr13	57557346	57560036	DEL	2689	0.48
chr13	58022623	58022940	DEL	316	0.712644
chr13	59866683	59868144	DEL	1460	0.827957
chr13	60013377	60013685	DEL	307	0.715054
chr13	60111212	60111213	INS	61	0.695402
chr13	60661633	60661634	INS	156	0.643678
chr13	61235008	61235315	DEL	306	0.747312
chr13	61367557	61367867	DEL	309	0.654321
chr13	62081744	62081745	INS	53	0.946237
chr13	63060382	63060460	DEL	77	0.865591
chr13	63473567	63473921	DEL	353	0.506667
chr13	67472087	67472196	DEL	108	0.426667
chr13	68318688	68318846	DEL	157	0.586207
chr13	68704374	68704702	DEL	327	0.870968
chr13	69592935	69595755	DEL	2819	0.58
chr13	69787534	69787754	DEL	219	0.603448
chr13	69792812	69792987	DEL	174	0.679012
chr13	71490462	71494346	DEL	3883	0.634409
chr13	73317016	73317328	DEL	311	0.983871
chr13	74274703	74274782	DEL	78	0.563218
chr13	75288965	75289279	DEL	313	0.574713
chr13	76398545	76398708	DEL	162	0.729885
chr13	76704928	76705803	DEL	874	0.956989
chr13	77235457	77235775	DEL	317	0.526667
chr13	78315183	78315518	DEL	334	0.606667
chr13	78601017	78601081	DEL	63	0.908602
chr13	78647146	78647147	INS	69	0.597701
chr13	78852573	78852896	DEL	322	0.729885
chr13	80178860	80179192	DEL	331	0.688172
chr13	81159513	81159514	INS	84	0.426667
chr13	81206375	81206376	INS	109	0.62963
chr13	81779493	81779678	DEL	184	0.58642
chr13	81836893	81836964	DEL	70	0.629032
chr13	81837245	81837318	DEL	72	0.553333
chr13	81838301	81838302	INS	307	0.546667
chr13	82239388	82239389	INS	199	0.609195
chr13	82406151	82406501	DEL	349	0.833333
chr13	82784502	82784503	INS	60	0.728395
chr13	85013680	85014347	DEL	666	0.741379
chr13	85035760	85035872	DEL	111	0.752874
chr13	85269986	85270065	DEL	78	0.811828
chr13	86247206	86247467	DEL	260	0.55914
chr13	87662043	87662044	INS	296	0.626667
chr13	87778150	87778151	INS	79	0.649425
chr13	88125499	88125500	INS	154	0.951613
chr13	88178737	88179941	DEL	1203	0.951613
chr13	88671867	88671868	INS	820	0.533333
chr13	89699826	89699900	DEL	73	0.54023
chr13	90711965	90712290	DEL	324	0.486667
chr13	91064454	91064760	DEL	305	0.746914
chr13	91442983	91442984	INS	57	0.632184
chr13	91652053	91652323	DEL	269	0.646667
chr13	92106977	92107035	DEL	57	0.567901
chr13	92944036	92944037	INS	98	0.887097
chr13	93705489	93705750	DEL	260	0.450617
chr13	97289410	97289730	DEL	319	0.655172
chr13	97358120	97358453	DEL	332	0.885057
chr13	97836107	97836193	DEL	85	0.54321
chr13	97836312	97836365	DEL	52	0.561728
chr13	98317574	98317719	DEL	144	0.488506
chr13	98322562	98322880	DEL	317	0.795699
chr13	100857000	100857696	DEL	695	0.924731
chr13	100953023	100953364	DEL	340	0.553333
chr13	101450265	101450456	DEL	190	0.623656
chr13	101665182	101665183	INS	137	0.530864
chr13	103124039	103124365	DEL	325	0.892473
chr13	103989033	103989034	INS	138	0.718391
chr13	105790933	105790934	INS	96	0.634409
chr13	107177543	107177544	INS	65	0.58046
chr13	107842851	107842852	INS	62	0.774194
chr13	108100850	108100851	INS	123	0.860215
chr13	108789125	108789180	DEL	54	0.505376
chr13	108797698	108797830	DEL	131	0.506173
chr13	109654534	109654858	DEL	323	0.42
chr13	109709873	109709874	INS	74	0.768817
chr13	109727119	109727120	INS	172	0.944444
chr13	110057357	110057358	INS	99	0.860215
chr13	110484584	110484585	INS	204	0.722222
chr13	110672968	110672969	INS	123	0.677419
chr13	110777463	110777640	DEL	176	0.555556
chr13	110865321	110865568	DEL	246	0.564516
chr13	110952034	110952551	DEL	516	0.678161
chr13	111002534	111002535	INS	88	0.766667
chr13	111047242	111047564	DEL	321	0.528736
chr13	111071088	111071089	INS	68	0.740741
chr13	111203654	111203707	DEL	52	0.806452
chr13	111270898	111270899	INS	74	0.623457
chr13	111458429	111458542	DEL	112	0.567901
chr13	111458724	111458890	DEL	165	0.567901
chr13	111529614	111531111	DEL	1496	0.593333
chr13	111536008	111536111	DEL	102	0.586667
chr13	111585635	111585965	DEL	329	0.602151
chr13	111787452	111788012	DEL	559	0.775862
chr13	112037489	112037634	DEL	144	0.68
chr13	112039670	112039671	INS	96	0.8
chr13	112112928	112113251	DEL	322	0.666667
chr13	112358868	112358869	INS	68	0.713333
chr13	112388280	112388610	DEL	329	0.741935
chr13	112607065	112607066	INS	90	0.607527
chr13	112631009	112631250	DEL	240	0.475309
chr13	112631009	112631330	DEL	320	0.5
chr13	112791735	112791790	DEL	54	0.688172
chr13	112824021	112824210	DEL	188	0.62
chr13	112950446	112950447	INS	60	0.802469
chr13	113037985	113037986	INS	137	0.655172
chr13	113039065	113039066	INS	75	0.697531
chr13	113044901	113044953	DEL	51	0.68
chr13	113124789	113124878	DEL	88	0.66092
chr13	113155138	113155297	DEL	158	0.798851
chr13	113156532	113156892	DEL	359	0.833333
chr13	113186855	113186856	INS	76	0.833333
chr13	113194760	113194818	DEL	57	0.844086
chr13	113270022	113270101	DEL	78	0.741935
chr13	113278535	113278732	DEL	196	0.606667
chr13	113347171	113347253	DEL	81	0.607527
chr14	658808	658878	DEL	69	0.396552
chr14	882921	882922	INS	68	0.46
chr14	945775	945843	DEL	67	0.4
chr14	1704028	1704125	DEL	96	0.54321
chr14	1704816	1705153	DEL	336	0.537037
chr14	2100488	2100647	DEL	158	0.467742
chr14	3179559	3179560	INS	69	0.373418
chr14	3181374	3181443	DEL	68	0.358824
chr14	3189634	3189635	INS	69	0.367089
chr14	4158378	4158379	INS	205	0.557471
chr14	4159335	4159336	INS	69	0.551724
chr14	4164307	4164308	INS	67	0.532258
chr14	4170120	4170257	DEL	136	0.532258
chr14	4170450	4170451	INS	69	0.551724
chr14	4171635	4171636	INS	68	0.554945
chr14	4176443	4176444	INS	306	0.561728
chr14	4232801	4234304	DEL	1502	0.557471
chr14	4235712	4235781	DEL	68	0.526882
chr14	4244085	4244222	DEL	136	0.510753
chr14	4246555	4246556	INS	67	0.550633
chr14	4248094	4248164	DEL	69	0.505495
chr14	4248674	4248675	INS	68	0.505495
chr14	4260041	4260111	DEL	69	0.561728
chr14	4260755	4260825	DEL	69	0.532258
chr14	4262045	4262113	DEL	67	0.532258
chr14	4263702	4263703	INS	68	0.532258
chr14	4264204	4264480	DEL	275	0.532258
chr14	4266313	4266314	INS	82	0.532258
chr14	4269320	4269390	DEL	69	0.532258
chr14	4278814	4278815	INS	68	0.606667
chr14	4296137	4296138	INS	68	0.543011
chr14	4298399	4298400	INS	68	0.537634
chr14	4310083	4310153	DEL	69	0.5
chr14	4327176	4327177	INS	68	0.547059
chr14	4327497	4327565	DEL	67	0.547059
chr14	4328608	4328745	DEL	136	0.535294
chr14	4332812	4332882	DEL	69	0.534483
chr14	4451442	4451528	DEL	85	0.353333
chr14	4452253	4452254	INS	81	0.58642
chr14	4462516	4462569	DEL	52	0.362069
chr14	4483907	4483977	DEL	69	0.362069
chr14	4509496	4509497	INS	55	0.55914
chr14	4532518	4533280	DEL	761	0.356322
chr14	4533137	4533282	DEL	144	0.483871
chr14	4540701	4541319	DEL	617	0.467742
chr14	4544689	4544690	INS	517	0.537037
chr14	4545674	4545675	INS	144	0.510753
chr14	4546588	4546737	DEL	148	0.505747
chr14	4549863	4550056	DEL	192	0.483871
chr14	4563190	4563283	DEL	92	0.467742
chr14	4575612	4577176	DEL	1563	0.478495
chr14	4578203	4578520	DEL	316	0.55914
chr14	4581660	4581766	DEL	105	0.483871
chr14	4643947	4644061	DEL	113	0.483871
chr14	4664076	4664430	DEL	353	0.5
chr14	4664436	4664437	INS	60	0.382716
chr14	4664782	4664783	INS	70	0.5
chr14	4666348	4666449	DEL	100	0.419355
chr14	4672966	4673122	DEL	155	0.4
chr14	4677072	4677073	INS	70	0.465517
chr14	4678114	4680562	DEL	2447	0.488506
chr14	4683416	4683622	DEL	205	0.5
chr14	4687599	4687680	DEL	80	0.483871
chr14	4688334	4688335	INS	59	0.494624
chr14	4689096	4689328	DEL	231	0.534483
chr14	4691437	4691438	INS	65	0.373333
chr14	4920264	4920331	DEL	66	0.444444
chr14	4978140	4994089	DEL	15948	0.432099
chr14	5003990	5004059	DEL	68	0.446667
chr14	5008285	5008286	INS	135	0.436709
chr14	5040131	5040132	INS	69	0.453333
chr14	5050374	5050375	INS	410	0.46
chr14	5053670	5053671	INS	68	0.46
chr14	5056209	5057712	DEL	1502	0.419753
chr14	5080795	5081283	DEL	487	0.433333
chr14	5089428	5092978	DEL	3549	0.433333
chr14	5119150	5119871	DEL	720	0.425926
chr14	5122049	5122187	DEL	137	0.436709
chr14	5123164	5123231	DEL	66	0.512658
chr14	5129303	5129304	INS	68	0.432099
chr14	5151316	5151386	DEL	69	0.466667
chr14	5152260	5152329	DEL	68	0.466667
chr14	5164131	5164132	INS	204	0.419753
chr14	5191046	5192275	DEL	1228	0.42
chr14	5193545	5193749	DEL	203	0.41358
chr14	5200080	5200081	INS	68	0.432099
chr14	5201372	5202531	DEL	1158	0.401235
chr14	5245460	5246687	DEL	1226	0.446667
chr14	5247050	5247257	DEL	206	0.46
chr14	5260839	5260840	INS	69	0.446667
chr14	5262380	5266340	DEL	3959	0.446667
chr14	5293925	5294009	DEL	83	0.432099
chr14	5296349	5296350	INS	69	0.432099
chr14	5302522	5302592	DEL	69	0.519481
chr14	5329024	5329161	DEL	136	0.46
chr14	5330183	5332496	DEL	2312	0.653333
chr14	5339551	5339552	INS	68	0.432099
chr14	5342080	5342081	INS	68	0.46
chr14	5344599	5346986	DEL	2386	0.433333
chr14	5363415	5363416	INS	137	0.446667
chr14	5367847	5367918	DEL	70	0.453333
chr14	5393020	5393426	DEL	405	0.419753
chr14	5481279	5481409	DEL	129	0.433333
chr14	5565920	5565981	DEL	60	0.41358
chr14	5569373	5569584	DEL	210	0.419753
chr14	5571028	5571029	INS	140	0.44
chr14	5575128	5575199	DEL	70	0.419753
chr14	5577151	5577227	DEL	75	0.407407
chr14	5582024	5582025	INS	75	0.44
chr14	5586236	5586321	DEL	84	0.403614
chr14	5586674	5586780	DEL	105	0.409639
chr14	5595776	5595777	INS	76	0.391566
chr14	8171471	8171644	DEL	172	0.469136
chr14	8175383	8175556	DEL	172	0.493827
chr14	8434150	8434205	DEL	54	0.483871
chr14	8535647	8535723	DEL	75	0.473118
chr14	8537018	8537412	DEL	393	0.456989
chr14	8554139	8554202	DEL	62	0.489247
chr14	8599971	8600216	DEL	244	0.470588
chr14	8865141	8865142	INS	60	0.857143
chr14	8898858	8899031	DEL	172	0.513333
chr14	8922131	8922132	INS	79	0.860215
chr14	8999583	8999892	DEL	308	0.962366
chr14	9138226	9138372	DEL	145	0.865591
chr14	9141153	9142786	DEL	1632	0.466667
chr14	9153269	9153330	DEL	60	0.511494
chr14	9264674	9264846	DEL	171	0.902597
chr14	9341290	9341291	INS	329	0.849462
chr14	9347164	9347165	INS	85	0.890805
chr14	9364278	9364450	DEL	171	0.733333
chr14	12738509	12739535	DEL	1025	0.777778
chr14	13280707	13280819	DEL	111	0.558824
chr14	13471878	13472500	DEL	621	0.425926
chr14	13811236	13811523	DEL	286	0.629032
chr14	14507324	14507552	DEL	227	0.549383
chr14	15265407	15265729	DEL	321	0.770115
chr14	15507500	15507716	DEL	215	0.545977
chr14	15681829	15683867	DEL	2037	0.58
chr14	15761595	15761810	DEL	214	0.83871
chr14	16296308	16296369	DEL	60	0.876344
chr14	16306174	16306272	DEL	97	0.973118
chr14	16504695	16504696	INS	533	0.77957
chr14	17404121	17404441	DEL	319	0.768817
chr14	17900844	17900909	DEL	64	0.781609
chr14	17967512	17967513	INS	65	0.902299
chr14	18100605	18100606	INS	206	0.597701
chr14	18562850	18563400	DEL	549	0.553333
chr14	22030071	22030072	INS	440	0.82716
chr14	23456822	23457586	DEL	763	0.58046
chr14	23664163	23664164	INS	113	0.486667
chr14	23724664	23724825	DEL	160	0.526667
chr14	24715120	24715373	DEL	252	0.623457
chr14	27284212	27284354	DEL	141	0.693548
chr14	28062377	28062688	DEL	310	0.956989
chr14	28221306	28221621	DEL	314	0.801075
chr14	28225185	28225264	DEL	78	0.548387
chr14	28900360	28903522	DEL	3161	0.91954
chr14	29035252	29035571	DEL	318	0.632184
chr14	29128781	29128782	INS	88	0.551724
chr14	31965095	31965311	DEL	215	0.695402
chr14	32079467	32079806	DEL	338	0.591954
chr14	33222186	33222187	INS	126	0.930108
chr14	33594505	33597498	DEL	2992	0.677419
chr14	34249956	34249957	INS	62	0.564516
chr14	34313689	34313690	INS	132	0.5
chr14	34331083	34338921	DEL	7837	0.512346
chr14	35730172	35730243	DEL	70	0.557471
chr14	36207923	36208239	DEL	315	0.741935
chr14	39827822	39828045	DEL	222	0.597701
chr14	40543726	40550525	DEL	6798	0.66129
chr14	40560214	40560215	INS	128	0.716049
chr14	42053578	42053810	DEL	231	0.768817
chr14	42909515	42910017	DEL	501	0.516129
chr14	43221135	43221221	DEL	85	0.494624
chr14	43459328	43459448	DEL	119	0.833333
chr14	43689978	43690126	DEL	147	0.5
chr14	45458740	45459052	DEL	311	0.611111
chr14	45948795	45948872	DEL	76	0.736559
chr14	48553823	48554144	DEL	320	0.549383
chr14	50176933	50176934	INS	286	0.635802
chr14	50405900	50406071	DEL	170	0.602151
chr14	53265289	53265290	INS	164	0.5
chr14	54081949	54081950	INS	1844	0.893333
chr14	55287725	55287857	DEL	131	0.801075
chr14	55969228	55969297	DEL	68	0.781609
chr14	56028037	56028370	DEL	332	0.962366
chr14	56961944	56962257	DEL	312	0.704301
chr14	56966860	56967199	DEL	338	0.553333
chr14	58245006	58245089	DEL	82	0.801075
chr14	63237217	63241264	DEL	4046	0.695402
chr14	65019533	65019662	DEL	128	0.833333
chr14	67539263	67540536	DEL	1272	0.471264
chr14	68408025	68408026	INS	309	0.654321
chr14	69241936	69242262	DEL	325	0.580247
chr14	70496410	70496477	DEL	66	0.466667
chr14	71031117	71031295	DEL	177	0.649425
chr14	73973486	73973540	DEL	53	0.645161
chr14	76487448	76487645	DEL	196	0.633333
chr14	77332843	77334348	DEL	1504	0.475309
chr14	77383016	77383665	DEL	648	0.736559
chr14	77731504	77731577	DEL	72	0.563218
chr14	79829377	79829558	DEL	180	0.551724
chr14	80129229	80134961	DEL	5731	0.526667
chr14	80595071	80595466	DEL	394	0.715054
chr14	80737694	80737756	DEL	61	0.715054
chr14	82530801	82531040	DEL	238	0.573333
chr14	84943979	84944305	DEL	325	0.603448
chr14	85782424	85782601	DEL	176	0.511494
chr14	85878512	85878833	DEL	320	0.833333
chr14	86350143	86350429	DEL	285	0.61828
chr14	86409150	86409151	INS	114	0.758065
chr14	87143070	87143197	DEL	126	0.5
chr14	87589694	87589785	DEL	90	0.634409
chr14	87596458	87596459	INS	316	0.634409
chr14	87949851	87950018	DEL	166	0.978495
chr14	88881134	88881285	DEL	150	0.493827
chr14	89704418	89704419	INS	84	0.45679
chr14	90019135	90019136	INS	92	0.913978
chr14	90571335	90571705	DEL	369	0.66092
chr14	92910436	92910437	INS	54	0.801075
chr14	93359974	93359975	INS	120	0.908602
chr14	93751963	93751964	INS	61	0.580645
chr14	94695672	94695673	INS	110	0.568966
chr14	95462468	95462469	INS	64	0.83871
chr14	96615657	96615964	DEL	306	0.734568
chr14	97367899	97367960	DEL	60	0.827957
chr14	97381047	97381048	INS	173	0.478495
chr14	97533736	97533737	INS	104	0.635802
chr14	98134949	98135018	DEL	68	0.626437
chr14	98322741	98322742	INS	263	0.48
chr14	98423366	98423490	DEL	123	0.829412
chr14	98446147	98446471	DEL	323	0.77957
chr14	98453479	98453480	INS	154	0.639241
chr14	98561948	98562001	DEL	52	0.827957
chr14	98616456	98616457	INS	142	0.709877
chr14	99050506	99050622	DEL	115	0.72
chr14	99054201	99054277	DEL	75	0.626437
chr14	99101031	99101032	INS	71	0.596774
chr14	99179599	99180114	DEL	514	0.513333
chr14	99180440	99180511	DEL	70	0.487654
chr14	99391728	99391781	DEL	52	0.673333
chr14	99690216	99690217	INS	106	0.555556
chr14	99751613	99751861	DEL	247	0.798851
chr14	99770676	99772522	DEL	1845	0.655172
chr14	99908844	99909102	DEL	257	0.60989
chr14	99909102	99909103	INS	176	0.60989
chr14	99909440	99909493	DEL	52	0.607527
chr14	99918775	99918845	DEL	69	0.557471
chr14	100128916	100128917	INS	64	0.561728
chr14	100220356	100220357	INS	90	0.689655
chr14	100223467	100223468	INS	104	0.592593
chr14	100285769	100286080	DEL	310	0.493827
chr14	100289457	100299014	DEL	9556	0.486667
chr14	100299174	100299258	DEL	83	0.486667
chr14	100571839	100572162	DEL	322	0.930108
chr15	85169	86034	DEL	864	0.545455
chr15	1016892	1016960	DEL	67	0.531646
chr15	1018833	1019311	DEL	477	0.525316
chr15	2293687	2293826	DEL	138	0.518519
chr15	2450651	2450713	DEL	61	0.521505
chr15	5423259	5423322	DEL	62	0.693548
chr15	6144618	6144619	INS	55	0.650538
chr15	13959504	13959565	DEL	60	0.597701
chr15	13971542	13972226	DEL	683	0.597701
chr15	13992387	13996146	DEL	3758	0.632184
chr15	14176504	14176505	INS	60	0.632184
chr15	14265541	14266227	DEL	685	0.637931
chr15	14392522	14392523	INS	682	0.685185
chr15	14462276	14462404	DEL	127	0.666667
chr15	14466610	14466696	DEL	85	0.666667
chr15	15317700	15317761	DEL	60	0.626374
chr15	15492024	15493729	DEL	1704	0.476471
chr15	15835430	15835431	INS	60	0.613333
chr15	17847614	17847615	INS	150	0.5
chr15	17857436	17857769	DEL	332	0.795699
chr15	18014086	18014087	INS	60	0.419753
chr15	18293151	18293226	DEL	74	0.576471
chr15	18682472	18682473	INS	55	0.493827
chr15	18954467	18961780	DEL	7312	0.475309
chr15	19289230	19289829	DEL	598	0.322581
chr15	19396737	19396881	DEL	143	0.442529
chr15	19397450	19397590	DEL	139	0.419355
chr15	19491555	19491840	DEL	284	0.432099
chr15	19593990	19593991	INS	87	0.486667
chr15	19902015	19902016	INS	56	0.613333
chr15	21838798	21839007	DEL	208	0.747126
chr15	22608318	22610060	DEL	1741	0.566667
chr15	22629080	22629172	DEL	91	0.655172
chr15	23166654	23166804	DEL	149	0.66
chr15	23227144	23227469	DEL	324	0.568966
chr15	23424034	23425019	DEL	984	0.553333
chr15	23992259	23992260	INS	60	0.747312
chr15	24367961	24368292	DEL	330	0.613333
chr15	25198272	25198273	INS	175	0.444444
chr15	26547850	26548167	DEL	316	0.682796
chr15	27348817	27348881	DEL	63	0.706667
chr15	27788596	27788665	DEL	68	0.806452
chr15	28468366	28468554	DEL	187	0.633333
chr15	29793169	29793478	DEL	308	0.672414
chr15	30854373	30854448	DEL	74	0.783951
chr15	31590563	31590564	INS	54	0.703704
chr15	32260480	32260808	DEL	327	0.58
chr15	32914648	32914777	DEL	128	0.94086
chr15	33461721	33461722	INS	127	0.549383
chr15	37204378	37204686	DEL	307	0.481481
chr15	38181419	38181752	DEL	332	0.892473
chr15	38229971	38230154	DEL	182	0.597701
chr15	38409917	38409970	DEL	52	0.493827
chr15	38553370	38553689	DEL	318	0.935484
chr15	42338983	42339286	DEL	302	0.672043
chr15	43085642	43085955	DEL	312	0.486667
chr15	45236409	45236584	DEL	174	0.771605
chr15	49780193	49781274	DEL	1080	0.641975
chr15	50918407	50918408	INS	77	0.790323
chr15	51084180	51085345	DEL	1164	0.790323
chr15	52412819	52412820	INS	101	0.698925
chr15	52445051	52445052	INS	251	0.688172
chr15	55127021	55127124	DEL	102	0.752688
chr15	57506391	57506392	INS	61	0.537634
chr15	58170629	58170756	DEL	126	0.5
chr15	59681019	59681105	DEL	85	0.735632
chr15	59829709	59830038	DEL	328	0.678161
chr15	60597315	60597641	DEL	325	0.768817
chr15	61282542	61285071	DEL	2528	0.677419
chr15	64686474	64686475	INS	164	0.494624
chr15	66232524	66232578	DEL	53	0.766667
chr15	66579804	66580135	DEL	330	0.712644
chr15	67654451	67654585	DEL	133	0.66129
chr15	68101966	68102159	DEL	192	0.566667
chr15	68207503	68207602	DEL	98	0.450617
chr15	68354108	68354212	DEL	103	0.726667
chr15	68684367	68684680	DEL	312	0.66092
chr15	69383826	69383918	DEL	91	0.74
chr15	69412213	69412528	DEL	314	0.930108
chr15	71008607	71008608	INS	184	0.517241
chr15	71713522	71713523	INS	71	0.469136
chr15	72993252	72993253	INS	54	0.693548
chr15	73445673	73445977	DEL	303	0.613333
chr15	74658954	74659240	DEL	285	0.611111
chr15	75329689	75330019	DEL	329	0.715054
chr15	76649422	76649783	DEL	360	0.747126
chr15	76655706	76655707	INS	92	0.729885
chr15	76809286	76809287	INS	63	0.691358
chr15	77216691	77216692	INS	191	0.462963
chr15	77375652	77376012	DEL	359	0.706897
chr15	77415937	77416073	DEL	135	0.591398
chr15	78964015	78964332	DEL	316	0.592593
chr15	80301107	80301108	INS	73	0.5
chr15	80470751	80471062	DEL	310	0.493333
chr15	80747212	80753264	DEL	6051	0.6
chr15	81040961	81041015	DEL	53	0.712644
chr15	81100648	81104710	DEL	4061	0.735632
chr15	82106522	82106700	DEL	177	0.532258
chr15	82671080	82671081	INS	132	0.637931
chr15	82996977	82997043	DEL	65	0.561728
chr15	84165689	84165774	DEL	84	0.649425
chr15	88557324	88558435	DEL	1110	0.844086
chr15	88578582	88578771	DEL	188	0.62
chr15	89199118	89200997	DEL	1878	0.617284
chr15	90333924	90333925	INS	78	0.5
chr15	90530830	90530979	DEL	148	0.573333
chr15	90534197	90534267	DEL	69	0.573333
chr15	90734819	90735133	DEL	313	0.887097
chr15	94641412	94641477	DEL	64	0.613333
chr15	96119659	96119735	DEL	75	0.603448
chr15	96795681	96796808	DEL	1126	0.623656
chr15	97554626	97554731	DEL	104	0.817204
chr15	98029288	98029623	DEL	334	0.506173
chr15	98115781	98116048	DEL	266	0.512346
chr15	98148235	98149682	DEL	1446	0.5
chr15	98375183	98375184	INS	92	0.698925
chr15	98529910	98529988	DEL	77	0.946237
chr15	98537831	98537888	DEL	56	0.66092
chr15	98557222	98557223	INS	883	0.822581
chr15	98850455	98850678	DEL	222	0.645161
chr15	98876760	98877061	DEL	300	0.580645
chr15	99089489	99089490	INS	99	0.712644
chr15	99116556	99116614	DEL	57	0.493333
chr15	99558825	99559142	DEL	316	0.568966
chr16	154807	154808	INS	109	0.54321
chr16	403033	403034	INS	56	0.597701
chr16	583463	583464	INS	72	0.575949
chr16	845801	845854	DEL	52	0.517241
chr16	915134	915135	INS	92	0.765432
chr16	930823	930878	DEL	54	0.724138
chr16	934180	934181	INS	65	0.635802
chr16	960724	960725	INS	731	0.598765
chr16	966002	966360	DEL	357	0.646667
chr16	967297	967355	DEL	57	0.611111
chr16	1015915	1015987	DEL	71	0.689655
chr16	1022120	1022121	INS	53	0.741935
chr16	1052504	1052609	DEL	104	0.606667
chr16	1499597	1499916	DEL	318	0.854839
chr16	1906576	1907842	DEL	1265	0.77957
chr16	1935236	1935298	DEL	61	0.701149
chr16	1939364	1940175	DEL	810	0.689655
chr16	2054269	2054270	INS	73	0.701149
chr16	2072023	2072357	DEL	333	0.860215
chr16	2293248	2293249	INS	83	0.506667
chr16	2320415	2320656	DEL	240	0.406667
chr16	2321455	2321456	INS	52	0.52
chr16	2807479	2807844	DEL	364	0.609195
chr16	3168763	3168843	DEL	79	0.697531
chr16	4486332	4486657	DEL	324	0.973118
chr16	4827100	4827173	DEL	72	0.546667
chr16	6402915	6402916	INS	308	0.660494
chr16	6666672	6666737	DEL	64	0.731183
chr16	7522710	7523017	DEL	306	0.725806
chr16	8113711	8113869	DEL	157	0.865591
chr16	8400270	8400583	DEL	312	0.790323
chr16	8511229	8511376	DEL	146	0.833333
chr16	8597238	8597347	DEL	108	0.467742
chr16	9081286	9081345	DEL	58	0.870968
chr16	9173406	9173945	DEL	538	0.438272
chr16	9807454	9807526	DEL	71	0.454023
chr16	11028500	11028816	DEL	315	0.729885
chr16	14442744	14443069	DEL	324	0.704301
chr16	14872416	14872493	DEL	76	0.682796
chr16	14952821	14952822	INS	57	0.424731
chr16	15105454	15105526	DEL	71	0.774194
chr16	15116746	15117427	INV	681	0.876344
chr16	16456287	16456288	INS	59	0.42
chr16	16537178	16537559	DEL	380	0.506667
chr16	17139491	17139547	DEL	55	0.603448
chr16	17150767	17150768	INS	57	0.691358
chr16	18639517	18639518	INS	62	0.752688
chr16	18652686	18657996	DEL	5309	0.594118
chr16	19182861	19183103	DEL	241	0.493333
chr16	20698150	20698471	DEL	320	0.645161
chr16	21353074	21353259	DEL	184	0.753012
chr16	21521203	21521204	INS	123	0.78022
chr16	22973684	22973685	INS	123	0.586207
chr16	23057944	23057945	INS	66	0.827957
chr16	24049842	24051334	DEL	1491	0.580645
chr16	24080035	24080092	DEL	56	0.54321
chr16	24174921	24175198	DEL	276	0.701149
chr16	24385412	24385591	DEL	178	0.860215
chr16	24592778	24593096	DEL	317	0.718391
chr16	25129792	25129793	INS	64	0.648148
chr16	25303638	25303639	INS	70	0.546667
chr16	28084163	28084325	DEL	161	0.586022
chr16	28121092	28121163	DEL	70	0.506173
chr16	28148745	28148822	DEL	76	0.768817
chr16	28623375	28623439	DEL	63	0.66092
chr16	28686294	28697151	DEL	10856	0.48
chr16	28697062	28697337	DEL	274	0.468354
chr16	28831074	28831161	DEL	86	0.5
chr16	29545528	29546242	DEL	713	0.88172
chr16	29996288	29996468	DEL	179	0.793103
chr16	30437881	30438017	DEL	135	0.551724
chr16	31703459	31703652	DEL	192	0.951613
chr16	32677653	32680628	DEL	2974	0.87037
chr16	33655733	33656275	DEL	541	0.740741
chr16	35478296	35478297	INS	142	0.453333
chr16	35634451	35634666	DEL	214	0.453333
chr16	37842358	37844403	DEL	2044	0.563218
chr16	38024425	38024426	INS	107	0.44
chr16	38586424	38586485	DEL	60	0.967742
chr16	39575609	39576020	DEL	410	0.506173
chr16	40468060	40468435	DEL	374	0.483146
chr16	41444146	41444573	DEL	426	0.795181
chr16	48283891	48283990	DEL	98	0.688235
chr16	49789348	49789349	INS	52	0.759259
chr16	51888408	51888409	INS	72	0.766667
chr16	51937981	51938054	DEL	72	0.395062
chr16	52081902	52082292	DEL	389	0.824675
chr16	52149532	52150681	DEL	1148	0.617284
chr16	54272255	54274716	DEL	2460	0.533333
chr16	54414571	54415104	INV	533	0.433333
chr16	54730021	54730422	DEL	400	0.635802
chr16	55263284	55263285	INS	59	0.91358
chr16	55274966	55275048	DEL	81	0.655914
chr16	55304230	55304231	INS	134	0.569892
chr16	56361619	56361620	INS	60	0.913978
chr16	56817638	56817639	INS	82	0.885057
chr16	58668202	58668203	INS	125	0.653333
chr16	59638797	59639109	DEL	311	0.709877
chr16	62378045	62378380	DEL	334	0.759259
chr16	63128332	63128333	INS	806	0.844086
chr16	64503224	64503311	DEL	86	0.655172
chr16	64555276	64555277	INS	134	0.865591
chr16	64559335	64559336	INS	56	0.865591
chr16	64577965	64578041	DEL	75	0.56
chr16	65455429	65455522	DEL	92	0.614943
chr16	65790011	65790326	DEL	314	0.752688
chr16	66846127	66846452	DEL	324	0.724138
chr16	67370444	67370445	INS	108	0.58642
chr16	68772000	68772062	DEL	61	0.650538
chr16	68772354	68772355	INS	64	0.827957
chr16	68817757	68817814	DEL	56	0.672043
chr16	69196572	69196890	DEL	317	0.645161
chr16	69858819	69858897	DEL	77	0.549383
chr16	70921659	70921660	INS	100	0.592593
chr16	72583581	72583923	DEL	341	0.511494
chr16	74954182	74954504	DEL	321	0.801075
chr16	75127121	75127122	INS	68	0.713333
chr16	75163623	75163950	DEL	326	0.741379
chr16	75171151	75171274	DEL	122	0.724138
chr16	75926984	75928167	DEL	1182	0.591398
chr16	75978729	75978819	DEL	89	0.61828
chr16	76294126	76294271	DEL	144	0.557471
chr16	76330284	76330605	DEL	320	0.617284
chr16	78168088	78168391	DEL	302	0.967742
chr16	78168392	78168393	INS	197	0.967742
chr16	82476266	82476391	DEL	124	0.596774
chr16	82561431	82566323	DEL	4891	0.677419
chr16	83586640	83586641	INS	58	0.5
chr16	84090332	84090333	INS	147	0.564516
chr16	84393944	84407201	DEL	13256	0.469136
chr16	84416833	84416925	DEL	91	0.534483
chr16	85887435	85891672	DEL	4236	0.924731
chr16	86037750	86038075	DEL	324	0.931034
chr16	86223980	86223981	INS	102	0.639785
chr16	86244377	86244702	DEL	324	0.655914
chr16	86258141	86258278	DEL	136	0.7
chr16	87766158	87766851	DEL	692	0.521978
chr16	88821776	88821914	DEL	137	0.752688
chr16	88858814	88859118	DEL	303	0.790323
chr16	89510283	89510372	DEL	88	0.465517
chr16	89697875	89698209	DEL	333	0.41358
chr16	90292793	90293136	DEL	342	0.833333
chr16	90996646	90997069	DEL	422	0.731183
chr16	90997497	90997498	INS	54	0.506667
chr16	91221194	91222304	INV	1110	0.44
chr16	91229477	91229539	DEL	61	0.42
chr16	91813570	91813707	DEL	136	0.611111
chr16	92102022	92102099	DEL	76	0.962366
chr16	92532093	92532094	INS	315	0.633333
chr16	93228251	93228574	DEL	322	0.746914
chr16	93805373	93805374	INS	51	0.566667
chr16	93918210	93918293	DEL	82	0.688172
chr16	94020797	94020852	DEL	54	0.66129
chr16	94199711	94199712	INS	75	0.614943
chr16	94231370	94231504	DEL	133	0.752874
chr16	94253289	94253372	DEL	82	0.746667
chr16	94261192	94261307	DEL	114	0.469136
chr16	94339125	94339394	DEL	268	0.617284
chr16	94347475	94347476	INS	155	0.766667
chr16	94380199	94380200	INS	174	0.626437
chr16	94463396	94463478	DEL	81	0.795699
chr16	94494572	94494573	INS	55	0.740506
chr16	94682632	94682818	DEL	185	0.543011
chr16	94894263	94894346	DEL	82	0.91954
chr16	94896151	94896277	DEL	125	0.623656
chr16	94904973	94904974	INS	281	0.597701
chr16	95057399	95057778	DEL	378	0.659341
chr16	95171582	95171682	DEL	99	0.715054
chr16	95192009	95192010	INS	53	0.870968
chr16	95197882	95197883	INS	108	0.860215
chr16	95201950	95202088	DEL	137	0.801075
chr16	95240399	95240400	INS	92	0.715054
chr16	95245883	95246044	DEL	160	0.747312
chr16	95272847	95272962	DEL	114	0.597701
chr16	95276464	95276465	INS	81	0.62069
chr16	95321525	95321526	INS	90	0.753086
chr16	95370546	95370617	DEL	70	0.786667
chr16	95387149	95387150	INS	212	0.721519
chr16	95408914	95408915	INS	52	0.609195
chr16	95422390	95422391	INS	87	0.598765
chr16	95470413	95470414	INS	96	0.666667
chr16	95478651	95478713	DEL	61	0.614943
chr16	95492603	95492604	INS	61	0.597701
chr16	95501818	95501969	DEL	150	0.617284
chr16	95509731	95510488	DEL	756	0.601266
chr16	95651685	95651686	INS	142	0.76
chr16	95667281	95667376	DEL	94	0.56
chr16	95678188	95678337	DEL	148	0.629032
chr16	95695443	95695499	DEL	55	0.505747
chr16	95703195	95703196	INS	54	0.695402
chr16	95734013	95734014	INS	65	0.729885
chr16	95830224	95830225	INS	190	0.561728
chr17	252714	252777	DEL	62	0.609195
chr17	255598	255661	DEL	62	0.77957
chr17	283667	283784	DEL	116	0.537037
chr17	283971	284132	DEL	160	0.626437
chr17	424999	425000	INS	139	0.66
chr17	647710	647711	INS	68	0.747312
chr17	653863	655023	DEL	1159	0.6
chr17	706822	707962	DEL	1139	0.586022
chr17	750257	750379	DEL	121	0.620879
chr17	941139	941756	DEL	616	0.691358
chr17	1045593	1047424	DEL	1830	0.506173
chr17	1050635	1050734	DEL	98	0.967742
chr17	1052071	1052686	DEL	206	0.740741
chr17	1212911	1212965	DEL	53	0.870968
chr17	1217324	1217325	INS	73	0.641975
chr17	1217680	1217681	INS	110	0.724138
chr17	1439759	1439760	INS	53	0.870968
chr17	2178844	2178845	INS	135	0.5
chr17	3173064	3173329	DEL	264	0.860215
chr17	3195252	3195253	INS	77	0.795699
chr17	3216371	3216964	DEL	592	0.844086
chr17	3720163	3721222	DEL	1058	0.553333
chr17	3979382	3979383	INS	66	0.693333
chr17	4021911	4022046	DEL	134	0.660494
chr17	4080867	4081251	DEL	383	0.703704
chr17	4273331	4273332	INS	635	0.735632
chr17	4485846	4485847	INS	120	0.741935
chr17	4769382	4769439	DEL	56	0.950617
chr17	4800327	4800476	DEL	148	0.919355
chr17	5668788	5668849	DEL	60	0.526667
chr17	5736303	5736381	DEL	77	0.545977
chr17	5902337	5902338	INS	316	0.546667
chr17	6461336	6461992	DEL	655	0.530864
chr17	6872102	6872405	DEL	302	0.54321
chr17	7165493	7165494	INS	292	0.586207
chr17	7450318	7450533	DEL	214	0.810345
chr17	8763169	8764119	DEL	949	0.666667
chr17	9069063	9069064	INS	117	0.844086
chr17	9133428	9133509	DEL	80	0.643678
chr17	10143131	10143292	DEL	160	0.763441
chr17	10892740	10893074	DEL	333	0.83871
chr17	11880686	11880687	INS	61	0.569892
chr17	13803878	13804193	DEL	314	0.768817
chr17	14397328	14397329	INS	405	0.580247
chr17	15862433	15862752	DEL	318	0.967742
chr17	16788288	16788620	DEL	331	0.935484
chr17	17387380	17387479	DEL	98	0.709877
chr17	18833981	18835361	DEL	1379	0.566667
chr17	21631617	21632783	DEL	1165	0.56
chr17	21692290	21692291	INS	60	0.586667
chr17	21828459	21828530	DEL	70	0.56
chr17	21849202	21849283	DEL	80	0.725806
chr17	21974291	21974357	DEL	65	0.790323
chr17	22050720	22050781	DEL	60	0.385057
chr17	22160475	22160611	DEL	135	0.60989
chr17	22805303	22805304	INS	4419	0.886667
chr17	23088006	23088007	INS	54	0.695402
chr17	27434688	27434856	DEL	167	0.577922
chr17	27641182	27641695	DEL	512	0.52
chr17	27731380	27731381	INS	75	0.973118
chr17	28209131	28209445	DEL	313	0.655914
chr17	28644866	28644867	INS	72	0.522989
chr17	29395223	29399491	DEL	4267	0.530864
chr17	30825428	30825509	DEL	80	0.597701
chr17	31014624	31015842	DEL	1217	0.580645
chr17	31100801	31100802	INS	814	0.611111
chr17	31599558	31599880	DEL	321	0.804598
chr17	32450888	32450960	DEL	71	0.725806
chr17	32460877	32461233	DEL	355	0.752688
chr17	33256489	33256490	INS	170	0.653333
chr17	33512615	33512927	DEL	311	0.654321
chr17	35248523	35248854	DEL	330	0.849462
chr17	37435455	37444902	DEL	9446	0.511494
chr17	37748263	37748264	INS	57	0.701149
chr17	38010354	38010445	DEL	90	0.56
chr17	38548601	38548919	DEL	317	0.817204
chr17	38796332	38796639	DEL	306	0.506173
chr17	42033646	42033842	DEL	195	0.5
chr17	42486228	42486229	INS	132	0.643678
chr17	43986833	43986960	DEL	126	0.688172
chr17	44205619	44209465	DEL	3845	0.74
chr17	44259372	44262074	DEL	2701	0.851852
chr17	44304954	44304955	INS	224	0.5
chr17	44828425	44828530	DEL	104	0.747126
chr17	44828848	44828849	INS	96	0.724138
chr17	45860695	45860764	DEL	68	0.701149
chr17	47420391	47420392	INS	80	0.811828
chr17	47969636	47969699	DEL	62	0.784946
chr17	49823558	49823679	DEL	120	0.526667
chr17	51171339	51171684	DEL	344	0.77957
chr17	51455520	51455521	INS	111	0.567901
chr17	54755018	54755341	DEL	322	0.545977
chr17	56888512	56888568	DEL	55	0.679012
chr17	60661630	60662600	DEL	969	0.537037
chr17	62585576	62585679	DEL	102	0.448276
chr17	63599834	63599968	DEL	133	0.747126
chr17	64524907	64525223	DEL	315	0.821839
chr17	66841428	66841652	DEL	223	0.592593
chr17	67510684	67517216	DEL	6531	0.790323
chr17	67810210	67810542	DEL	331	0.586667
chr17	68170925	68170926	INS	160	0.685185
chr17	68182971	68183288	DEL	316	0.612903
chr17	69108209	69108210	INS	218	0.586022
chr17	70489173	70489518	DEL	344	0.52
chr17	70523318	70523395	DEL	76	0.666667
chr17	70717271	70717272	INS	63	0.88172
chr17	70756540	70756856	DEL	315	0.827957
chr17	70941966	70942173	DEL	206	0.518519
chr17	71209466	71209787	DEL	320	0.844086
chr17	71731108	71731299	DEL	190	0.436782
chr17	72729086	72729414	DEL	327	0.752688
chr17	73558352	73558480	DEL	127	0.614943
chr17	73760658	73768725	DEL	8066	0.555556
chr17	75935936	75935937	INS	317	0.758621
chr17	76452068	76452149	DEL	80	0.672043
chr17	76696270	76696271	INS	97	0.653333
chr17	77599682	77599769	DEL	86	0.591954
chr17	77603195	77603322	DEL	126	0.611111
chr17	77884245	77884564	DEL	318	0.913978
chr17	78139175	78139344	DEL	168	0.973118
chr17	78350375	78350376	INS	60	0.989247
chr17	78381786	78381787	INS	169	0.593333
chr17	79005648	79005832	DEL	183	0.887097
chr17	79050745	79051063	DEL	317	0.83871
chr17	80047062	80047063	INS	115	0.765432
chr17	80452971	80453092	DEL	120	0.606667
chr17	81158029	81158030	INS	73	0.533333
chr17	81182450	81182956	DEL	505	0.6
chr17	81467052	81467053	INS	52	0.833333
chr17	81491939	81492013	DEL	73	0.512346
chr17	81746173	81746230	DEL	56	0.666667
chr17	81986590	81986664	DEL	73	0.693548
chr17	82051946	82051947	INS	71	0.533333
chr17	82405388	82405444	DEL	55	0.44086
chr17	82420576	82421565	DEL	988	0.521505
chr17	82560251	82560568	DEL	316	0.633333
chr17	82569728	82569782	DEL	53	0.626667
chr17	82876744	82876745	INS	57	0.666667
chr17	82989613	82989688	DEL	74	0.555556
chr17	83015035	83015151	DEL	115	0.531646
chr17	83015600	83016954	DEL	1353	0.54321
chr17	83018140	83018196	DEL	55	0.555556
chr17	83018758	83018831	DEL	72	0.54321
chr17	83028173	83028226	DEL	52	0.555556
chr17	83030559	83030735	DEL	175	0.566667
chr17	83213561	83213617	DEL	55	0.747312
chr17	83216289	83216513	DEL	223	0.54321
chr17	83255379	83255380	INS	89	0.56
chr17	83265268	83265269	INS	98	0.650538
chr17	83720217	83720218	INS	91	0.944444
chr17	83720955	83721011	DEL	55	0.606667
chr17	83748001	83748072	DEL	70	0.598765
chr17	84087346	84087433	DEL	86	0.546667
chr17	84214735	84214736	INS	149	0.919355
chr17	84228342	84228960	DEL	617	0.623457
chr17	84235757	84235934	DEL	176	0.567901
chr17	84236114	84236292	DEL	177	0.567901
chr18	449193	449326	DEL	132	0.655172
chr18	2221685	2222500	DEL	814	0.573333
chr18	3152901	3152983	DEL	81	0.596774
chr18	3171698	3171699	INS	54	0.741379
chr18	4162260	4162315	DEL	54	0.494253
chr18	4515824	4516130	DEL	305	0.666667
chr18	4740497	4740572	DEL	74	0.654321
chr18	5117863	5118260	DEL	396	0.598765
chr18	7234358	7234412	DEL	53	0.553333
chr18	7305281	7307862	DEL	2580	0.678161
chr18	8072821	8072822	INS	56	0.827957
chr18	8076206	8076264	DEL	57	0.709677
chr18	9090249	9090570	DEL	320	0.870968
chr18	9097971	9097972	INS	102	0.9
chr18	9388661	9388662	INS	335	0.469136
chr18	9548577	9548899	DEL	321	0.573333
chr18	9785312	9785619	DEL	306	0.666667
chr18	10000152	10000263	DEL	110	0.790323
chr18	10493051	10493192	DEL	140	0.432099
chr18	10919562	10919641	DEL	78	0.510753
chr18	13315198	13315199	INS	96	0.650538
chr18	14851185	14851186	INS	56	0.846667
chr18	15081467	15081527	DEL	59	0.68
chr18	15092411	15092684	DEL	272	0.573333
chr18	15092877	15093144	DEL	266	0.606667
chr18	15817300	15820703	DEL	3402	0.74
[truncated: 2,972 more rows]

## Sheet: deletions
chrom	start	end	length	cf_pur	cf_eur	count_pur	count_eur	cf_pvalue	odds_ratio	gnomad_amr_cf	gnomad_nfe_cf	gene	cds	5_utr	3_utr	intronic	gene	cds	5_utr	3_utr	intronic	gene	cds	5_utr	3_utr	intronic	gene	cds	5_utr	3_utr	intronic	gene	cds	5_utr	3_utr	intronic	gene	cds	5_utr	3_utr	intronic	gene	cds	5_utr	3_utr	intronic	gene	cds	5_utr
chr3	190201143	190201207	64	0.6667	0.0444	30	2	2.91e-10	43.0515	NA	NA
chr22	13006339	13007701	1362	0.6667	0.0444	30	2	2.91e-10	43.0515	NA	NA
chr22	12956614	12960701	4087	0.5556	0	25	0	5.46e-10	Inf	NA	NA
chr6	102911841	102911895	54	0.6667	0.0667	30	3	2.4e-09	27.9892	NA	NA	GRIK2				1
chr1	116377480	116377561	81	0.5111	0	23	0	5.23e-09	Inf	NA	NA
chr22	12864458	12867186	2728	0.5111	0	23	0	5.23e-09	Inf	NA	NA
chr18	23687858	23687950	92	0.4889	0	22	0	1.54e-08	Inf	NA	NA
chr17	1083552	1084007	455	0.8889	0.3111	40	14	2.49e-08	17.7172	0.36029	0.25678	ABR				1
chr22	12794875	12796231	1356	0.6222	0.0667	28	3	2.5e-08	23.0443	NA	NA
chr22	12873742	12875104	1362	0.4667	0	21	0	4.44e-08	Inf	NA	NA
chr3	190201209	190201272	63	0.2667	0.8444	12	38	4.65e-08	0.0670197	NA	NA
chr6	103009599	103010877	1278	0.6444	0.0889	29	4	4.8e-08	18.572	NA	NA	GRIK2				1
chr2	94661053	94664107	3054	0.9333	0.4	42	18	7.57e-08	20.9888	NA	NA
chr22	12966343	12969409	3066	0.6	0.0667	27	3	7.57e-08	20.9888	NA	NA
chr17	12821095	12821149	54	0.4444	0	20	0	1.24e-07	Inf	NA	NA	ARHGAP44				1
chr22	13018127	13019491	1364	0.4444	0	20	0	1.24e-07	Inf	NA	NA
chr2	238887654	238887917	263	0.2667	0.8222	12	37	1.83e-07	0.0786494	NA	NA	TRAF3IP1				1
chr7	57052730	57054712	1982	0.2667	0.8222	12	37	1.83e-07	0.0786494	NA	NA
chr18	20296106	20296448	342	0.2444	0.8	11	36	2.05e-07	0.0808629	NA	NA
chr5	118156417	118156477	60	0.4222	0	19	0	3.4e-07	Inf	NA	NA
chr19	47383915	47383966	51	0.4222	0	19	0	3.4e-07	Inf	NA	NA
chr10	128291194	128291840	646	0.4222	0	19	0	3.4e-07	Inf	NA	NA	DOCK1				1
chr19	29395022	29398421	3399	0.4222	0	19	0	3.4e-07	Inf	NA	NA
chr18	20295669	20296011	342	0.3111	0.8444	14	38	4.66e-07	0.0832157	NA	NA
chr22	6845839	6848248	2409	0.3111	0.8444	14	38	4.66e-07	0.0832157	NA	NA
chr4	192590223	192591039	816	0.7111	0.1778	32	8	5.72e-07	11.3823	NA	NA
chr9	44916242	44916304	62	0.4667	0.0222	21	1	6.53e-07	38.5446	NA	NA
chr5	57221238	57221538	300	0.2667	0.8	12	36	6.53e-07	0.0909246	NA	NA
chr22	13043644	13044324	680	0.4667	0.0222	21	1	6.53e-07	38.5446	NA	NA
chr9	149590065	149590233	168	0.4	0	18	0	9.06e-07	Inf	NA	NA	EXD3				1
chr5	45625756	45625812	56	0	0.4	0	18	9.06e-07	0	NA	NA	HCN1				1
chr14	58245625	58246014	389	0.4	0	18	0	9.06e-07	Inf	8e-05	0	SYNE2				1
chr22	12939387	12940749	1362	0.4	0	18	0	9.06e-07	Inf	NA	NA
chr21	11300404	11301254	850	0.6444	0.1333	29	6	1.01e-06	11.7824	NA	NA
chr22	13040926	13042970	2044	0.4444	0.0222	20	1	1.72e-06	35.2297	NA	NA
chr22	12861070	12862434	1364	0.4889	0.0444	22	2	1.94e-06	20.5877	NA	NA
chr2	66982688	66982746	58	0.7778	0.2667	35	12	2.13e-06	9.6246	NA	NA
chr2	242410152	242410221	69	0.3778	0	17	0	2.36e-06	Inf	NA	NA	FAM240C				1
chr6	30610750	30610906	156	0.3778	0	17	0	2.36e-06	Inf	NA	NA
chr16	52165899	52167047	1148	0.3778	0	17	0	2.36e-06	Inf	NA	NA
chr22	16517841	16519206	1365	1	0.6222	45	28	2.36e-06	Inf	NA	NA
chr22	15446006	15447370	1364	0.3778	0	17	0	2.36e-06	Inf	NA	NA
chr2	66982746	66982803	57	0.1333	0.6222	6	28	2.78e-06	0.0933885	NA	NA
chr6	19811413	19811512	99	0.1333	0.6222	6	28	2.78e-06	0.0933885	NA	NA
chr9	113666995	113668108	1113	0.0889	0.5556	4	25	3.07e-06	0.0780454	NA	NA	PGAP4				1
chr7	60423386	60423726	340	0.5556	0.0889	25	4	3.07e-06	12.813	NA	NA
chr22	49889013	49889459	446	0.9111	0.4444	41	20	3.07e-06	12.813	NA	NA
chr2	235527204	235527364	160	0.6444	0.1556	29	7	3.74e-06	9.83405	NA	NA	SH3BP4				1
chr15	26401844	26401946	102	0.5111	0.0667	23	3	4.29e-06	14.6279	0.00026	0
chr8	23824566	23825203	637	0.5111	0.0667	23	3	4.29e-06	14.6279	0.19223	0.08741	SLC25A37				1
chr22	2673325	2674445	1120	0.4222	0.0222	19	1	4.43e-06	32.1838	NA	NA
chr18	19674168	19674509	341	0.1778	0.6667	8	30	4.69e-06	0.108108	NA	NA
chr20	20415580	20415698	118	0.4667	0.0444	21	2	4.98e-06	18.8347	NA	NA	CFAP61				1
chr19	26260389	26260730	341	0.4667	0.0444	21	2	4.98e-06	18.8347	NA	NA
chr19	29467428	29468108	680	0.4667	0.0444	21	2	4.98e-06	18.8347	NA	NA
chr22	2061695	2063602	1907	0.8889	0.4222	40	19	4.99e-06	10.9496	NA	NA
chr9	143579628	143579694	66	0.6889	0.2	31	9	5.51e-06	8.8576	NA	NA
chr5	120566143	120566215	72	0.3556	0	16	0	6.02e-06	Inf	0.00024	0.00015
chr16	94813363	94813482	119	0	0.3556	0	16	6.02e-06	0	NA	NA	PIEZO1				1
chr19	47376201	47376291	90	0.3556	0	16	0	6.02e-06	Inf	8e-05	0.00017
chr2	90005131	90006393	1262	0.3556	0	16	0	6.02e-06	Inf	NA	NA
chr9	45146083	45146763	680	0	0.3556	0	16	6.02e-06	0	NA	NA
chr1	19466254	19466398	144	0.3556	0	16	0	6.02e-06	Inf	0.00143	0.0007	NBL1				1
chr22	13029435	13030799	1364	0.3556	0	16	0	6.02e-06	Inf	NA	NA
chr22	12807379	12808914	1535	0.3556	0	16	0	6.02e-06	Inf	NA	NA
chr14	3318738	3321460	2722	0.3556	0	16	0	6.02e-06	Inf	NA	NA
chr1	965035	965354	319	0.3556	0	16	0	6.02e-06	Inf	0.18889	0.02688	ATAD3A				1
chr2	172035631	172035876	245	0.7556	0.2667	34	12	6.45e-06	8.5006	0	0
chr10	79638422	79638525	103	0.8667	0.4	39	18	7.31e-06	9.75281	NA	NA
chr10	79638428	79638533	105	0.1333	0.6	6	27	7.31e-06	0.102535	NA	NA
chr10	42908878	42909458	580	0.6	0.1333	27	6	7.31e-06	9.75281	NA	NA
chr22	20726076	20742395	16319	0.6	0.1333	27	6	7.31e-06	9.75281	NA	NA
chr16	42921179	42921277	98	0.5333	0.0889	24	4	7.88e-06	11.7111	NA	NA
chr19	57325363	57327399	2036	0.4667	0.9111	21	41	7.88e-06	0.085389	NA	NA	RPS9				1
chr9	48923325	48924894	1569	0.4667	0.9111	21	41	7.88e-06	0.085389	NA	NA
chr7	159115641	159116036	395	0.1556	0.6222	7	28	9.85e-06	0.111891	NA	NA	PTPRN2				1
chr22	14911160	14912524	1364	0.1556	0.6222	7	28	9.85e-06	0.111891	NA	NA
chr22	12845887	12846911	1024	0.6222	0.1556	28	7	9.85e-06	8.93731	NA	NA
chr8	136744688	136744742	54	0.4889	0.0667	22	3	1.08e-05	13.3847	0.12826	0.06731	KHDRBS3				1
chr6	156268103	156268176	73	0.6	0.9778	27	44	1.11e-05	0.034056	0.468	0.4673	TIAM2				1
chr7	107047815	107047959	144	0.0222	0.4	1	18	1.11e-05	0.034056	NA	NA	ATXN7L1				1
chr9	48620716	48621146	430	0.4	0.0222	18	1	1.11e-05	29.3634	NA	NA
chr7	57060114	57061720	1606	0.4	0.0222	18	1	1.11e-05	29.3634	NA	NA
chr18	16740423	16740765	342	0.4	0.0222	18	1	1.11e-05	29.3634	NA	NA
chr17	6693805	6693883	78	0.0222	0.4	1	18	1.11e-05	0.034056	NA	NA	TEKT1				1	FBXO39				1
chr7	159117914	159118211	297	0.1778	0.6444	8	29	1.24e-05	0.119333	NA	NA	PTPRN2				1
chr2	76079841	76079923	82	0.6444	0.1778	29	8	1.24e-05	8.37991	NA	NA
chr1	144525621	144525928	307	0.8222	0.3556	37	16	1.24e-05	8.37991	NA	NA
chr22	50853405	50853513	108	0.4444	0.0444	20	2	1.24e-05	17.2149	NA	NA	PPP6R2				1
chr1	913958	915329	1371	0.4444	0.0444	20	2	1.24e-05	17.2149	0	2e-05	ATAD3B				1
chr1	2212197	2215919	3722	0.5556	0.9556	25	43	1.24e-05	0.0580891	NA	NA
chr15	16684860	16686386	1526	0.5556	0.1111	25	5	1.27e-05	10.0029	NA	NA
chr2	141395600	141395688	88	0.6667	0.2	30	9	1.47e-05	8.0012	0.27227	0.17811	LRP1B				1
chr16	94468628	94469573	945	0.2	0.6667	9	30	1.47e-05	0.124981	NA	NA	ZNF469				1
chr1	224273142	224273227	85	0.3333	0	15	0	1.51e-05	Inf	NA	NA	DNAH14				1
chr9	146477523	146477633	110	0	0.3333	0	15	1.51e-05	0	NA	NA
chr2	163209555	163209856	301	0.3333	0	15	0	1.51e-05	Inf	NA	NA	KCNH7				1
chr1	104219643	104219960	317	0.3333	0	15	0	1.51e-05	Inf	NA	NA
chr9	47875830	47875945	115	0.3333	0	15	0	1.51e-05	Inf	NA	NA
chr4	192589236	192591243	2007	0	0.3333	0	15	1.51e-05	0	0.03714	0.06069
chr15	83564660	83565224	564	0.3333	0	15	0	1.51e-05	Inf	0	2e-05
chr22	23552931	23552983	52	0.3333	0	15	0	1.51e-05	Inf	NA	NA	RSPH14				1
chr4	135043998	135046499	2501	0	0.3333	0	15	1.51e-05	0	NA	NA
chr20	49577494	49578175	681	0	0.3333	0	15	1.51e-05	0	NA	NA
chr10	112126880	112133857	6977	0	0.3333	0	15	1.51e-05	0	0	0.0002
chr19	14341679	14341822	143	0	0.3333	0	15	1.51e-05	0	NA	NA
chr18	20496315	20496657	342	0.3333	0	15	0	1.51e-05	Inf	NA	NA
chr19	27638993	27640352	1359	0.3333	0	15	0	1.51e-05	Inf	NA	NA
chr9	76335145	76346665	11520	0	0.3333	0	15	1.51e-05	0	NA	NA
chr12	36898331	36901041	2710	0	0.3333	0	15	1.51e-05	0	NA	NA
chr18	19607729	19609764	2035	0	0.3333	0	15	1.51e-05	0	NA	NA
chr2	91290553	91353868	63315	0.3333	0	15	0	1.51e-05	Inf	NA	NA
chr22	13019289	13020653	1364	0.3333	0	15	0	1.51e-05	Inf	NA	NA
chr22	12965441	12966803	1362	0.3333	0	15	0	1.51e-05	Inf	NA	NA
chr22	12926095	12927457	1362	0.3333	0	15	0	1.51e-05	Inf	NA	NA
chr3	22242569	22249655	7086	0.3333	0	15	0	1.51e-05	Inf	0.00111	0.00032	ZNF385D				1
chr1	2715631	2715876	245	0.6667	1	30	45	1.51e-05	0	NA	NA	PRDM16				1
chr15	9562963	9566500	3537	0.3333	0	15	0	1.51e-05	Inf	NA	NA
chr15	6128570	6132071	3501	0.3333	0	15	0	1.51e-05	Inf	NA	NA
chr13	946210	948838	2628	0	0.3333	0	15	1.51e-05	0	NA	NA
chr10	41791511	41793208	1697	0.3333	0	15	0	1.51e-05	Inf	NA	NA
chr2	7142076	7142217	141	0.3111	0.7778	14	35	1.65e-05	0.129009	NA	NA
chr6	133571490	133571814	324	0.7556	0.2889	34	13	1.77e-05	7.60981	0.37629	0.23528	MOXD1				1
chr6	10355186	10355264	78	0.7556	0.2889	34	13	1.77e-05	7.60981	NA	NA
chr20	30674523	30676400	1877	0.7333	0.2667	33	12	1.81e-05	7.55992	NA	NA
chr5	160844107	160844213	106	0.4889	0.9111	22	41	1.95e-05	0.0933361	0.38352	0.44645	CCNJL				1
chr2	47906601	47906657	56	0.0889	0.5111	4	23	1.95e-05	0.0933361	NA	NA	FBXO11				1
chr2	40262098	40262155	57	0.5111	0.0889	23	4	1.95e-05	10.714	NA	NA	SLC8A1				1
chr6	72209267	72209467	200	0.5111	0.0889	23	4	1.95e-05	10.714	NA	NA
chr11	27941102	27941298	196	0.5111	0.0889	23	4	1.95e-05	10.714	0.19811	0.11794
chr9	47536539	47537051	512	0.6	0.1556	27	7	2.48e-05	8.1401	NA	NA
chr11	123157883	123157939	56	0.5333	0.9333	24	42	2.63e-05	0.0816654	NA	NA	CLMP				1
chr18	80038795	80038885	90	0.0667	0.4667	3	21	2.63e-05	0.0816654	0.00176	0.00525
chr2	92500642	92501322	680	0.4667	0.0667	21	3	2.63e-05	12.2451	NA	NA
chr2	94415050	94417089	2039	0.4667	0.0667	21	3	2.63e-05	12.2451	NA	NA
chrX	58094548	58096605	2057	0.0667	0.4667	3	21	2.63e-05	0.0816654	NA	NA
chr22	16522202	16523216	1014	0.4667	0.0667	21	3	2.63e-05	12.2451	NA	NA
chr22	14834171	14835534	1363	0.0667	0.4667	3	21	2.63e-05	0.0816654	NA	NA
chr22	12834821	12836014	1193	0.4667	0.0667	21	3	2.63e-05	12.2451	NA	NA
chr1	121812710	121813730	1020	0.0222	0.3778	1	17	2.71e-05	0.0373913	NA	NA
chr2	109659826	109660778	952	0.3778	0.0222	17	1	2.71e-05	26.7442	NA	NA	SH3RF3				1
chrX	60236482	60237333	851	0.0222	0.3778	1	17	2.71e-05	0.0373913	NA	NA
chr18	74425648	74428697	3049	0.0222	0.3778	1	17	2.71e-05	0.0373913	NA	NA
chr22	13030729	13031751	1022	0.3778	0.0222	17	1	2.71e-05	26.7442	NA	NA
chr8	886315	887577	1262	0.3778	0.0222	17	1	2.71e-05	26.7442	0.18119	0.11624	DLGAP2				1
chr21	699767	701741	1974	0.0222	0.3778	1	17	2.71e-05	0.0373913	NA	NA
chr20	49652136	49652332	196	0.0444	0.4222	2	19	3.01e-05	0.0635867	NA	NA
chr21	9383480	9384895	1415	0.4667	0.8889	21	40	3.09e-05	0.109377	NA	NA
chr7	57045505	57047343	1838	0.3778	0.8222	17	37	3.12e-05	0.131307	NA	NA
chr16	41166156	41167758	1602	0.6222	0.1778	28	8	3.12e-05	7.61577	NA	NA
chr2	241592519	241592604	85	0.3111	0	14	0	3.69e-05	Inf	0.00032	0.00065	MTERF4				1	SNED1			2
chr4	192222763	192222856	93	0.3111	0	14	0	3.69e-05	Inf	NA	NA
chr10	123099580	123099657	77	0.3111	0	14	0	3.69e-05	Inf	8e-05	0	TACC2				1
chr13	105466074	105466130	56	0.3111	0	14	0	3.69e-05	Inf	NA	NA
chr5	118156399	118156477	78	0	0.3111	0	14	3.69e-05	0	NA	NA
chr2	89507396	89507454	58	0.3111	0	14	0	3.69e-05	Inf	NA	NA
chr14	95593643	95593714	71	0	0.3111	0	14	3.69e-05	0	NA	NA
chr9	132486792	132487109	317	0.3111	0	14	0	3.69e-05	Inf	NA	NA
chr3	87472014	87472180	166	0.3111	0	14	0	3.69e-05	Inf	NA	NA
chr1	121798095	121798434	339	0.3111	0	14	0	3.69e-05	Inf	NA	NA
chr12	114612103	114612429	326	0.3111	0	14	0	3.69e-05	Inf	NA	NA
chr5	110465812	110466130	318	0.3111	0	14	0	3.69e-05	Inf	0.0808	0.04689
chr10	133367113	133367657	544	0.3111	0	14	0	3.69e-05	Inf	NA	NA
chr11	44882682	44882755	73	0.3111	0	14	0	3.69e-05	Inf	0.00345	5e-05
chr5	182012049	182013694	1645	0	0.3111	0	14	3.69e-05	0	NA	NA
chr9	48612423	48613421	998	0.3111	0	14	0	3.69e-05	Inf	NA	NA
chr9	46846506	46847698	1192	0	0.3111	0	14	3.69e-05	0	NA	NA
chrX	58226734	58228791	2057	0	0.3111	0	14	3.69e-05	0	NA	NA
chr18	79887569	79893420	5851	0.3111	0	14	0	3.69e-05	Inf	NA	NA
chr19	29278746	29279765	1019	0.3111	0	14	0	3.69e-05	Inf	NA	NA
chr18	16531317	16532337	1020	0.3111	0	14	0	3.69e-05	Inf	NA	NA
chr22	15404571	15405935	1364	0.3111	0	14	0	3.69e-05	Inf	NA	NA
chr22	13028238	13029602	1364	0	0.3111	0	14	3.69e-05	0	NA	NA
chr22	12870711	12872075	1364	0.3111	0	14	0	3.69e-05	Inf	NA	NA
chr18	19688677	19692747	4070	0	0.3111	0	14	3.69e-05	0	NA	NA
chr17	3433082	3433215	133	0.3111	0	14	0	3.69e-05	Inf	NA	NA	TRPV3				1
chr22	15305603	15308330	2727	0.3111	0	14	0	3.69e-05	Inf	NA	NA
chr8	7001779	7009425	7646	0	0.3111	0	14	3.69e-05	0	NA	NA
chr14	1301616	1302371	755	0	0.3111	0	14	3.69e-05	0	NA	NA
chr10	257825	258059	234	0.3111	0	14	0	3.69e-05	Inf	0.00342	0.00158
chr13	1020087	1026833	6746	0.3111	0	14	0	3.69e-05	Inf	NA	NA
chr21	493433	495134	1701	0	0.3111	0	14	3.69e-05	0	NA	NA
chr5	165424085	165424153	68	0.3556	0.8	16	36	3.72e-05	0.137958	0	5e-05
chr2	92644908	92647284	2376	0.6444	0.2	29	9	3.72e-05	7.24859	NA	NA
chr5	1104221	1104380	159	0.8	0.3556	36	16	3.72e-05	7.24859	NA	NA
chr12	78258977	78259081	104	0.5556	0.1333	25	6	4.46e-05	8.12881	NA	NA
chr8	46100422	46102289	1867	0.5556	0.1333	25	6	4.46e-05	8.12881	NA	NA
chr5	53355978	53358851	2873	0.5556	0.1333	25	6	4.46e-05	8.12881	NA	NA
chr9	46864143	46866695	2552	0.1333	0.5556	6	25	4.46e-05	0.123019	NA	NA
chr16	80822610	80822672	62	0.2444	0.6889	11	31	4.59e-05	0.146067	0.22884	0.29821
chr17	75533615	75533753	138	0.7556	0.3111	34	14	4.59e-05	6.84616	0.40424	0.32052
chr3	104757429	104758414	985	0.6889	0.2444	31	11	4.59e-05	6.84616	NA	NA
chr2	2803400	2803459	59	0.3111	0.7556	14	34	4.59e-05	0.146067	NA	NA
chr12	128322574	128322633	59	0.4889	0.0889	22	4	4.65e-05	9.80344	NA	NA	TMEM132C				1
chr18	79958807	79959735	928	0.0889	0.4889	4	22	4.65e-05	0.102005	NA	NA	CTDP1				1
chr10	42856180	42857412	1232	0.4889	0.0889	22	4	4.65e-05	9.80344	NA	NA
chr2	135046916	135047043	127	0.2889	0.7333	13	33	4.78e-05	0.14776	NA	NA	TMEM163				1
chr7	57058256	57059854	1598	0.7111	0.2667	32	12	4.78e-05	6.76771	NA	NA
chr2	91228248	91233375	5127	0.7111	0.2667	32	12	4.78e-05	6.76771	NA	NA
chr16	37742129	37743488	1359	0.2889	0.7333	13	33	4.78e-05	0.14776	NA	NA
chr2	159707696	159707802	106	0.1556	0.5778	7	26	5.97e-05	0.134649	NA	NA	WDSUB1				1
chr6	39961849	39961919	70	0.5778	0.1556	26	7	5.97e-05	7.42674	NA	NA
chr1	120455319	120461669	6350	0.1556	0.5778	7	26	5.97e-05	0.134649	NA	NA
chr12	33103347	33116547	13200	0.5778	0.1556	26	7	5.97e-05	7.42674	NA	NA
chr13	10311996	10315647	3651	0.5778	0.1556	26	7	5.97e-05	7.42674	NA	NA
chr3	475169	475258	89	0.4222	0.8444	19	38	5.97e-05	0.134649	NA	NA
chr20	63464658	63464762	104	0.4444	0.0667	20	3	6.21e-05	11.192	NA	NA	CDH4				1
chr15	26483734	26483895	161	0.4444	0.0667	20	3	6.21e-05	11.192	0.02774	0.00477	GOLGA8M				1
chr10	39637381	39639416	2035	0.4444	0.0667	20	3	6.21e-05	11.192	NA	NA
chr22	15330155	15331519	1364	0.4444	0.0667	20	3	6.21e-05	11.192	NA	NA
chr2	134820924	134820983	59	0.3556	0.0222	16	1	6.46e-05	24.3054	NA	NA	MGAT5				1
chr9	102632445	102632505	60	0.6444	0.9778	29	44	6.46e-05	0.0411431	NA	NA
chr9	47835322	47835404	82	0.3556	0.0222	16	1	6.46e-05	24.3054	NA	NA
chr9	47864869	47864968	99	0.3556	0.0222	16	1	6.46e-05	24.3054	NA	NA
chr18	74430563	74431508	945	0.0222	0.3556	1	16	6.46e-05	0.0411431	NA	NA
chr9	65085302	65086216	914	0.3556	0.0222	16	1	6.46e-05	24.3054	NA	NA
chr12	36820766	36822123	1357	0.0222	0.3556	1	16	6.46e-05	0.0411431	NA	NA
chr19	7095549	7095612	63	0.3556	0.0222	16	1	6.46e-05	24.3054	NA	NA
chr22	10727212	10727467	255	0.0222	0.3556	1	16	6.46e-05	0.0411431	NA	NA
chr22	12857894	12859258	1364	0.3556	0.0222	16	1	6.46e-05	24.3054	NA	NA
chr15	9487155	9488903	1748	0.3556	0.0222	16	1	6.46e-05	24.3054	NA	NA
chr22	2678043	2678752	709	0.3556	0.0222	16	1	6.46e-05	24.3054	NA	NA
chr20	65168293	65168808	515	0.0444	0.4	2	18	7.11e-05	0.0696944	NA	NA	CHRNA4				1
chr2	89375307	89377797	2490	0.4	0.0444	18	2	7.11e-05	14.3483	NA	NA
chr6	10457039	10457097	58	0.0444	0.4	2	18	7.11e-05	0.0696944	NA	NA	GCNT2				1
chr15	12271003	12272732	1729	0.4	0.0444	18	2	7.11e-05	14.3483	NA	NA
chr1	2216942	2218346	1404	0.0444	0.4	2	18	7.11e-05	0.0696944	9e-05	0
chr13	1105219	1105964	745	0.4	0.0444	18	2	7.11e-05	14.3483	NA	NA
chr15	1343781	1348152	4371	0.4	0.0444	18	2	7.11e-05	14.3483	NA	NA
chr19	40000189	40002717	2528	0.0444	0.4	2	18	7.11e-05	0.0696944	NA	NA
chr8	102749383	102749516	133	0.5111	0.1111	23	5	7.28e-05	8.36421	NA	NA	GRHL2				1
chr16	56883935	56883999	64	0.1111	0.5111	5	23	7.28e-05	0.119557	NA	NA
chr7	63557256	63557935	679	0.5111	0.1111	23	5	7.28e-05	8.36421	NA	NA
chr8	44489834	44490347	513	0.5111	0.1111	23	5	7.28e-05	8.36421	NA	NA
chr20	3644578	3644648	70	0.1111	0.5111	5	23	7.28e-05	0.119557	NA	NA	ATRN				1
chr21	9377937	9379344	1407	0.1111	0.5111	5	23	7.28e-05	0.119557	NA	NA
chr19	488135	488399	264	0.1111	0.5111	5	23	7.28e-05	0.119557	NA	NA	CDC34				1
chr8	143898161	143898230	69	0.8222	0.4	37	18	7.52e-05	6.93645	0.00024	7e-05
chr1	182342046	182342357	311	0.6	0.1778	27	8	7.52e-05	6.93645	NA	NA
chr6	65444683	65444734	51	0.1778	0.6	8	27	7.52e-05	0.144166	NA	NA	EYS				1
chr4	135050769	135053250	2481	0.1778	0.6	8	27	7.52e-05	0.144166	NA	NA
chr17	5133545	5133627	82	0.4	0.8222	18	37	7.52e-05	0.144166	NA	NA
chr4	721657	721709	52	0.1778	0.6	8	27	7.52e-05	0.144166	NA	NA	PCGF3				1
chr4	707569	707713	144	0.1778	0.6	8	27	7.52e-05	0.144166	NA	NA	PCGF3				1
chr1	241086353	241086641	288	0	0.2889	0	13	8.88e-05	0	0.47409	0.47053	WDR64				1	OPN3				1
chr4	104420644	104420714	70	0	0.2889	0	13	8.88e-05	0	NA	NA	PPP3CA				1
chr10	127447558	127447660	102	0	0.2889	0	13	8.88e-05	0	NA	NA	C10orf90				1
chr8	128444059	128444170	111	0.2889	0	13	0	8.88e-05	Inf	NA	NA
chr4	104420636	104420729	93	0.2889	0	13	0	8.88e-05	Inf	NA	NA	PPP3CA				1
chr2	91165182	91165254	72	0	0.2889	0	13	8.88e-05	0	NA	NA
chr20	64082718	64082778	60	0.2889	0	13	0	8.88e-05	Inf	NA	NA	OSBPL2				1
chrX	64524682	64524748	66	0	0.2889	0	13	8.88e-05	0	NA	NA
chr6	77101453	77101557	104	0	0.2889	0	13	8.88e-05	0	0.04765	0.02509	IMPG1				1
chr19	58253804	58253878	74	0.2889	0	13	0	8.88e-05	Inf	NA	NA	DNAAF3				1
chr7	151217000	151217776	776	0	0.2889	0	13	8.88e-05	0	NA	NA
chr16	38099580	38099750	170	0.2889	0	13	0	8.88e-05	Inf	NA	NA
chr7	60469775	60470226	451	0.2889	0	13	0	8.88e-05	Inf	NA	NA
chr5	47567446	47567788	342	0	0.2889	0	13	8.88e-05	0	NA	NA
chr16	38098969	38099310	341	0.2889	0	13	0	8.88e-05	Inf	NA	NA
chr5	47568153	47568832	679	0	0.2889	0	13	8.88e-05	0	NA	NA
chr9	49603381	49604613	1232	0	0.2889	0	13	8.88e-05	0	NA	NA
chr13	20922445	20922703	258	0	0.2889	0	13	8.88e-05	0	NA	NA
chrX	58692107	58694164	2057	0	0.2889	0	13	8.88e-05	0	NA	NA
chr16	37736177	37737197	1020	0	0.2889	0	13	8.88e-05	0	NA	NA
chr7	11329439	11329539	100	0	0.2889	0	13	8.88e-05	0	NA	NA
chr19	52458851	52461449	2598	0.2889	0	13	0	8.88e-05	Inf	NA	NA	ALDH16A1				1
chr8	16512545	16512821	276	0.2889	0	13	0	8.88e-05	Inf	NA	NA	MSR1				1
chr9	48946625	48949219	2594	0.2889	0	13	0	8.88e-05	Inf	NA	NA
chrX	41878695	41881101	2406	0.2889	0	13	0	8.88e-05	Inf	0.05867	0.00179
chr20	7901325	7901413	88	0.7111	1	32	45	8.88e-05	0	NA	NA
chr9	44934164	44938099	3935	0.2889	0	13	0	8.88e-05	Inf	NA	NA
chr19	25834992	25836689	1697	0	0.2889	0	13	8.88e-05	0	NA	NA
chr17	4742518	4742587	69	0.2889	0	13	0	8.88e-05	Inf	NA	NA	MINK1				1
chr20	8073666	8073871	205	0	0.2889	0	13	8.88e-05	0	0.00025	0
chr18	19753064	19754424	1360	0	0.2889	0	13	8.88e-05	0	NA	NA
chr22	13036825	13037504	679	0.2889	0	13	0	8.88e-05	Inf	NA	NA
chr22	15442986	15444350	1364	0	0.2889	0	13	8.88e-05	0	NA	NA
chr1	2718656	2718717	61	0.7111	1	32	45	8.88e-05	0	NA	NA	PRDM16				1
chr22	12957088	12959812	2724	0.2889	0	13	0	8.88e-05	Inf	NA	NA
chr15	10053461	10055269	1808	0.2889	0	13	0	8.88e-05	Inf	NA	NA
chr21	2364002	2364146	144	0.2889	0	13	0	8.88e-05	Inf	NA	NA
chr10	1367764	1367830	66	0.2889	0	13	0	8.88e-05	Inf	NA	NA	ADARB2				1
chr1	580052	580258	206	0.2889	0	13	0	8.88e-05	Inf	0.04281	0.0054
chr4	192853155	192853320	165	0.6222	0.2	28	9	8.98e-05	6.58761	NA	NA
chr17	4742535	4742587	52	0.3778	0.8	17	36	8.98e-05	0.1518	NA	NA	MINK1				1
chr4	712846	712971	125	0.2	0.6222	9	28	8.98e-05	0.1518	NA	NA	PCGF3				1
chr4	153411736	153412068	332	0.6444	0.2222	29	10	0.000103	6.34334	NA	NA	DCLK2				1
chr7	66705840	66706533	693	0.3556	0.7778	16	35	0.000103	0.157646	NA	NA
chr10	131910159	131910248	89	0.1333	0.5333	6	24	0.000104	0.134595	NA	NA
chr22	45767327	45767407	80	0.5333	0.1333	24	6	0.000104	7.42972	NA	NA
chrX	58111129	58115243	4114	0.1333	0.5333	6	24	0.000104	0.134595	NA	NA
chr5	496702	496804	102	0.5333	0.1333	24	6	0.000104	7.42972	0.00024	0.00058	SLC9A3				1
chr10	722252	722720	468	0.1333	0.5333	6	24	0.000104	0.134595	0.11079	0.0971
chrX	124393381	124393446	65	0.4667	0.0889	21	4	0.000108	8.96872	NA	NA
chr20	32399831	32399961	130	0.9111	0.5333	41	24	0.000108	8.96872	NA	NA
chr17	26893018	26893353	335	0.4667	0.0889	21	4	0.000108	8.96872	NA	NA
chr22	12832993	12835721	2726	0.4667	0.0889	21	4	0.000108	8.96872	NA	NA
chr21	1019021	1019089	68	0.9111	0.5333	41	24	0.000108	8.96872	NA	NA
chr11	64227044	64227154	110	0.6667	0.2444	30	11	0.000112	6.18423	NA	NA	VEGFB				1
chr18	16203465	16204483	1018	0.2444	0.6667	11	30	0.000112	0.161702	NA	NA
chr7	2149271	2149380	109	0.2444	0.6667	11	30	0.000112	0.161702	NA	NA	MAD1L1				1
chr20	451380	451462	82	0.3333	0.7556	15	34	0.000112	0.161702	NA	NA	RBCK1				1
chr7	159144738	159144828	90	0.7333	0.3111	33	14	0.000119	6.08856	NA	NA	PTPRN2				1
chr2	172035598	172035873	275	0.2667	0.6889	12	31	0.000119	0.164242	0	0
chr7	103999682	104002831	3149	0.6889	0.2667	31	12	0.000119	6.08856	NA	NA	RASA4	1			2
chr2	139318050	139318171	121	0.7111	0.2889	32	13	0.000121	6.05852	NA	NA
chr5	1597362	1597675	313	0.7111	0.2889	32	13	0.000121	6.05852	NA	NA
chr1	128713327	128713387	60	0.4444	0.8444	20	38	0.000138	0.147392	NA	NA
chr2	130491295	130491471	176	0.1556	0.5556	7	25	0.000138	0.147392	NA	NA
chr21	35711497	35711596	99	0.1556	0.5556	7	25	0.000138	0.147392	NA	NA
chr19	16870621	16870672	51	0.1556	0.5556	7	25	0.000138	0.147392	NA	NA	NWD1				1
chr1	4034273	4034465	192	0.1556	0.5556	7	25	0.000138	0.147392	NA	NA
chr8	427922	428000	78	0.1556	0.5556	7	25	0.000138	0.147392	NA	NA	ERICH1				1
chr4	192222703	192222796	93	0.5778	0.9333	26	42	0.000142	0.0978056	NA	NA
chr9	96545261	96545323	62	0.0667	0.4222	3	19	0.000142	0.0978056	NA	NA
chr14	60752467	60752565	98	0.4222	0.0667	19	3	0.000142	10.2244	0	2e-05	GPHN				1
chr14	41163792	41164110	318	0.4222	0.0667	19	3	0.000142	10.2244	0.18599	0.02825	MDGA2				1
chr20	21926302	21926589	287	0.9333	0.5778	42	26	0.000142	10.2244	NA	NA
chr9	48791425	48792870	1445	0.4222	0.0667	19	3	0.000142	10.2244	NA	NA
chr14	7458391	7461451	3060	0.9333	0.5778	42	26	0.000142	10.2244	NA	NA
chr9	149578228	149578300	72	0.3333	0.0222	15	1	0.000151	22.0192	NA	NA	EXD3				1
chr12	125834103	125834172	69	0.9778	0.6667	44	30	0.000151	22.0192	NA	NA
chr9	149569760	149570048	288	0.0222	0.3333	1	15	0.000151	0.0454149	NA	NA	EXD3				1
chr2	94634183	94634521	338	0.0222	0.3333	1	15	0.000151	0.0454149	NA	NA
chr9	44909666	44909793	127	0.3333	0.0222	15	1	0.000151	22.0192	NA	NA
chr9	47575495	47576175	680	0.0222	0.3333	1	15	0.000151	0.0454149	NA	NA
chr3	18790885	18790995	110	0.3333	0.0222	15	1	0.000151	22.0192	NA	NA
chr19	26371495	26372175	680	0.3333	0.0222	15	1	0.000151	22.0192	NA	NA
chr17	22082224	22083259	1035	0.3333	0.0222	15	1	0.000151	22.0192	NA	NA
chr9	48488674	48521917	33243	0.3333	0.0222	15	1	0.000151	22.0192	NA	NA
chr2	112191067	112191123	56	0.0444	0.3778	2	17	0.000163	0.07652	NA	NA	ANAPC1				1
chr1	102567926	102567989	63	0.3778	0.0444	17	2	0.000163	13.0685	0.07909	0.03644
chr3	73059850	73059909	59	0.0444	0.3778	2	17	0.000163	0.07652	NA	NA	PPP4R2				1
chrX	56308232	56308294	62	0.0444	0.3778	2	17	0.000163	0.07652	NA	NA
chr15	80352543	80352703	160	0.3778	0.0444	17	2	0.000163	13.0685	NA	NA
chr14	99179635	99179941	306	0.3778	0.0444	17	2	0.000163	13.0685	NA	NA	PLD4				1
chr3	63357344	63357548	204	0.0444	0.3778	2	17	0.000163	0.07652	NA	NA	SYNPR				1
chr13	50990371	50990667	296	0.3778	0.0444	17	2	0.000163	13.0685	NA	NA	DHRS12				1
chr7	60439979	60441001	1022	0.3778	0.0444	17	2	0.000163	13.0685	NA	NA
chr22	50851733	50852579	846	0.3778	0.0444	17	2	0.000163	13.0685	NA	NA	PPP6R2				1
chr7	20804676	20804843	167	0.3778	0.0444	17	2	0.000163	13.0685	NA	NA	ABCB5				1
chr12	34712008	34712687	679	0.0444	0.3778	2	17	0.000163	0.07652	NA	NA
chr18	20757889	20759244	1355	0.0444	0.3778	2	17	0.000163	0.07652	NA	NA
chr13	26280520	26284257	3737	0.3778	0.0444	17	2	0.000163	13.0685	NA	NA
chr9	3509462	3509559	97	0.3778	0.0444	17	2	0.000163	13.0685	NA	NA	RFX3				1
chr22	15458272	15461000	2728	0.0444	0.3778	2	17	0.000163	0.07652	NA	NA
chr22	15361552	15364280	2728	0.3778	0.0444	17	2	0.000163	13.0685	NA	NA
chr9	3508240	3508513	273	0.3778	0.0444	17	2	0.000163	13.0685	NA	NA	RFX3				1
chr19	2561097	2561249	152	0.3778	0.0444	17	2	0.000163	13.0685	NA	NA	GNG7				1
chr21	9407050	9411282	4232	0.0444	0.3778	2	17	0.000163	0.07652	NA	NA
chr11	1587605	1587765	160	0.0444	0.3778	2	17	0.000163	0.07652	NA	NA
chr22	3123887	3124637	750	0.3778	0.0444	17	2	0.000163	13.0685	NA	NA
chr13	1102405	1103534	1129	0.3778	0.0444	17	2	0.000163	13.0685	NA	NA
chrY	410422	411021	599	0.0444	0.3778	2	17	0.000163	0.07652	NA	NA
chr12	130452889	130452941	52	0.8889	0.5111	40	23	0.000166	7.65338	NA	NA	RIMBP2				1
chr9	144927886	144928065	179	0.4889	0.1111	22	5	0.000166	7.65338	0.01636	0.00684
chr16	67206964	67207098	134	0.4889	0.1111	22	5	0.000166	7.65338	0.07292	0.01319
chr7	63612947	63613287	340	0.4889	0.1111	22	5	0.000166	7.65338	NA	NA
chr22	13042270	13043634	1364	0.1111	0.4889	5	22	0.000166	0.130661	NA	NA
chr18	2117924	2118139	215	0.4889	0.1111	22	5	0.000166	7.65338	NA	NA
chr5	69877965	69878017	52	0.8222	0.4222	37	19	0.000173	6.32856	NA	NA
chr11	64227052	64227154	102	0.1778	0.5778	8	26	0.000173	0.158014	NA	NA	VEGFB				1
chr19	17879420	17880112	692	0.1778	0.5778	8	26	0.000173	0.158014	0.18837	0.17995
chr19	61337623	61337677	54	0.2	0.6	9	27	0.000207	0.166667	NA	NA	ZNF544				1
chr5	18098538	18098598	60	0.4	0.8	18	36	0.000207	0.166667	NA	NA
chr7	4705854	4714357	8503	0.2	0.6	9	27	0.000207	0.166667	NA	NA
chr13	1137145	1137895	750	0.6	0.2	27	9	0.000207	6	NA	NA
chr1	191254077	191254129	52	0.2667	0	12	0	0.00021	Inf	NA	NA
chr1	160563018	160563075	57	0	0.2667	0	12	0.00021	0	NA	NA
chr6	159816514	159816580	66	0.2667	0	12	0	0.00021	Inf	NA	NA	TMEM181				1
chr5	171373791	171373896	105	0	0.2667	0	12	0.00021	0	NA	NA
chr4	150479102	150479192	90	0	0.2667	0	12	0.00021	0	NA	NA
chr6	116520811	116520877	66	0.2667	0	12	0	0.00021	Inf	NA	NA
chrX	149037317	149037430	113	0.2667	0	12	0	0.00021	Inf	0.24821	0.01802	CD99L2				1
chr10	112134095	112134161	66	0.2667	0	12	0	0.00021	Inf	NA	NA
chr10	96873237	96873307	70	0.2667	0	12	0	0.00021	Inf	NA	NA	CC2D2B				1
chr2	87836681	87836749	68	0	0.2667	0	12	0.00021	0	NA	NA	RGPD2				1
chr9	147906135	147906377	242	0.2667	0	12	0	0.00021	Inf	0.00089	0.00022
chr5	114099553	114099713	160	0	0.2667	0	12	0.00021	0	NA	NA	YTHDC2				1
chr3	73059840	73059909	69	0.2667	0	12	0	0.00021	Inf	NA	NA	PPP4R2				1
chr7	129419582	129419803	221	0	0.2667	0	12	0.00021	0	NA	NA
chr4	72436834	72436906	72	0.2667	0	12	0	0.00021	Inf	NA	NA
chr11	127112413	127112641	228	0.2667	0	12	0	0.00021	Inf	NA	NA
chrX	66758576	66758665	89	0.2667	0	12	0	0.00021	Inf	NA	NA	OPHN1				1
chr4	191856143	191856989	846	0	0.2667	0	12	0.00021	0	NA	NA
chr22	48408779	48408839	60	0	0.2667	0	12	0.00021	0	NA	NA
chr9	72352335	72352483	148	0.2667	0	12	0	0.00021	Inf	NA	NA
chr9	48956767	48956836	69	0.2667	0	12	0	0.00021	Inf	NA	NA
chr4	91711715	91711971	256	0.2667	0	12	0	0.00021	Inf	NA	NA	HERC6				1
chr4	192332359	192333507	1148	0.2667	0	12	0	0.00021	Inf	0.00064	0.00076
chr3	42928241	42928298	57	0	0.2667	0	12	0.00021	0	NA	NA	ZNF662				1
chr11	62268709	62268838	129	0.2667	0	12	0	0.00021	Inf	NA	NA
chr8	91626787	91627069	282	0.2667	0	12	0	0.00021	Inf	0.05672	0.01378
chr15	39462484	39462537	53	0	0.2667	0	12	0.00021	0	NA	NA	MGA				1
chr15	58169967	58170097	130	0.2667	0	12	0	0.00021	Inf	NA	NA	ANXA2				1
chr6	42090696	42090780	84	0.2667	0	12	0	0.00021	Inf	NA	NA	TRERF1				1
chr11	134699644	134700586	942	0	0.2667	0	12	0.00021	0	NA	NA
chr2	94610890	94611570	680	0	0.2667	0	12	0.00021	0	NA	NA
chr2	94376270	94376950	680	0	0.2667	0	12	0.00021	0	NA	NA
chr2	94148438	94149117	679	0	0.2667	0	12	0.00021	0	NA	NA
chr7	63646317	63646659	342	0.2667	0	12	0	0.00021	Inf	NA	NA
chr9	49822249	49822464	215	0.2667	0	12	0	0.00021	Inf	NA	NA
chr13	57689468	57689784	316	0.2667	0	12	0	0.00021	Inf	0.06969	0.06629
chr9	75385233	75385812	579	0.2667	0	12	0	0.00021	Inf	NA	NA
chr16	94468779	94469696	917	0.2667	0	12	0	0.00021	Inf	0.00223	0.0023	ZNF469				1
chr9	51025840	51026143	303	0.2667	0	12	0	0.00021	Inf	NA	NA
chr3	22284236	22284296	60	0.2667	0	12	0	0.00021	Inf	0.0004	0.00016	ZNF385D				1
chr1	121713731	121715596	1865	0	0.2667	0	12	0.00021	0	NA	NA
chr19	52463226	52463588	362	0.2667	0	12	0	0.00021	Inf	NA	NA	ALDH16A1				1
chr15	99511570	99512887	1317	0	0.2667	0	12	0.00021	0	NA	NA
chr1	121677071	121679266	2195	0.2667	0	12	0	0.00021	Inf	NA	NA
chr9	72527312	72528160	848	0.2667	0	12	0	0.00021	Inf	NA	NA
chr1	126604838	126607902	3064	0	0.2667	0	12	0.00021	0	NA	NA
chr17	22044172	22044267	95	0.2667	0	12	0	0.00021	Inf	NA	NA
chr14	51705277	51705828	551	0.2667	0	12	0	0.00021	Inf	0.00135	0.00239
chr2	136274027	136277978	3951	0.7333	1	33	45	0.00021	0	NA	NA	LCT				1
chr20	32067385	32067635	250	0.2667	0	12	0	0.00021	Inf	NA	NA
chr2	94591588	94594307	2719	0	0.2667	0	12	0.00021	0	NA	NA
chrX	40003570	40004073	503	0.2667	0	12	0	0.00021	Inf	0.19222	0.00708	ATP6AP2				1
chr1	121642841	121647515	4674	0	0.2667	0	12	0.00021	0	NA	NA
chr21	14932793	14932865	72	0.2667	0	12	0	0.00021	Inf	NA	NA
chr13	12259551	12259605	54	0.2667	0	12	0	0.00021	Inf	NA	NA
chr13	12259987	12260041	54	0.2667	0	12	0	0.00021	Inf	NA	NA
chr19	26324643	26324984	341	0.2667	0	12	0	0.00021	Inf	NA	NA
chr4	55291120	55292646	1526	0.2667	0	12	0	0.00021	Inf	NA	NA
chr16	39995019	39995855	836	0.2667	0	12	0	0.00021	Inf	NA	NA
chrX	58425306	58427363	2057	0	0.2667	0	12	0.00021	0	NA	NA
chr4	20913513	20913777	264	0.2667	0	12	0	0.00021	Inf	NA	NA	KCNIP4				1
chr7	58721499	58723587	2088	0	0.2667	0	12	0.00021	0	NA	NA
chrX	58235165	58237221	2056	0.2667	0	12	0	0.00021	Inf	NA	NA
chr10	41875296	41876654	1358	0.2667	0	12	0	0.00021	Inf	NA	NA
chrX	58512892	58515800	2908	0.2667	0	12	0	0.00021	Inf	NA	NA
chr20	49575080	49577429	2349	0	0.2667	0	12	0.00021	0	NA	NA
chr20	16276577	16276849	272	0.2667	0	12	0	0.00021	Inf	NA	NA
chr19	29224714	29225734	1020	0.2667	0	12	0	0.00021	Inf	NA	NA
chr21	16075186	16075516	330	0.2667	0	12	0	0.00021	Inf	NA	NA
chr19	15905476	15905825	349	0	0.2667	0	12	0.00021	0	NA	NA
chr18	20429920	20430604	684	0.2667	0	12	0	0.00021	Inf	NA	NA
chr19	29728617	29730317	1700	0.2667	0	12	0	0.00021	Inf	NA	NA
chr19	28403064	28404764	1700	0.2667	0	12	0	0.00021	Inf	NA	NA
chr19	26225228	26226929	1701	0.2667	0	12	0	0.00021	Inf	NA	NA
chr17	27476231	27478104	1873	0.2667	0	12	0	0.00021	Inf	NA	NA
chr18	19991806	19993166	1360	0.2667	0	12	0	0.00021	Inf	NA	NA
chr19	24962342	24964560	2218	0	0.2667	0	12	0.00021	0	NA	NA
chr9	44984820	44992130	7310	0	0.2667	0	12	0.00021	0	NA	NA
chr18	20955433	20957136	1703	0	0.2667	0	12	0.00021	0	NA	NA
chr15	16694624	16695814	1190	0.2667	0	12	0	0.00021	Inf	NA	NA
chr18	17484218	17485578	1360	0	0.2667	0	12	0.00021	0	NA	NA
chr15	19295973	19297715	1742	0.2667	0	12	0	0.00021	Inf	NA	NA
chr18	20784449	20786480	2031	0	0.2667	0	12	0.00021	0	NA	NA
chr17	4742353	4742466	113	0.2667	0	12	0	0.00021	Inf	NA	NA	MINK1				1
chr18	16103789	16105150	1361	0	0.2667	0	12	0.00021	0	NA	NA
chr22	15604671	15606034	1363	0.2667	0	12	0	0.00021	Inf	NA	NA
chr22	15431520	15432884	1364	0.2667	0	12	0	0.00021	Inf	NA	NA
chr22	14979159	14980523	1364	0.2667	0	12	0	0.00021	Inf	NA	NA
chr18	15812747	15814448	1701	0	0.2667	0	12	0.00021	0	NA	NA
chr6	21923541	21926947	3406	0.2667	0	12	0	0.00021	Inf	0.20787	0.00929
chr18	19820778	19823831	3053	0.2667	0	12	0	0.00021	Inf	NA	NA
chr22	13079954	13081317	1363	0.2667	0	12	0	0.00021	Inf	NA	NA
chr18	20922511	20926072	3561	0	0.2667	0	12	0.00021	0	NA	NA
chr22	12799749	12801112	1363	0.2667	0	12	0	0.00021	Inf	NA	NA
chr22	15014616	15016660	2044	0.2667	0	12	0	0.00021	Inf	NA	NA
chr15	13611502	13613331	1829	0.2667	0	12	0	0.00021	Inf	NA	NA
chr22	12967705	12969409	1704	0.2667	0	12	0	0.00021	Inf	NA	NA
chr22	15087993	15090379	2386	0	0.2667	0	12	0.00021	0	NA	NA
chr15	12978082	12979911	1829	0.2667	0	12	0	0.00021	Inf	NA	NA
chr21	9432635	9434041	1406	0	0.2667	0	12	0.00021	0	NA	NA
chr22	12923018	12925744	2726	0.2667	0	12	0	0.00021	Inf	NA	NA
chr20	32062891	32085520	22629	0.2667	0	12	0	0.00021	Inf	NA	NA
chr15	8858061	8859790	1729	0.2667	0	12	0	0.00021	Inf	NA	NA
chr22	2397707	2397837	130	0	0.2667	0	12	0.00021	0	NA	NA
chr15	9760200	9762479	2279	0.2667	0	12	0	0.00021	Inf	NA	NA
chr21	8241340	8243046	1706	0	0.2667	0	12	0.00021	0	NA	NA
chr15	7694702	7696506	1804	0.2667	0	12	0	0.00021	Inf	NA	NA
chr22	6947781	6949324	1543	0	0.2667	0	12	0.00021	0	NA	NA
chr22	2868427	2869474	1047	0.2667	0	12	0	0.00021	Inf	NA	NA
chr22	3126821	3128693	1872	0.2667	0	12	0	0.00021	Inf	NA	NA
chr22	345133	345197	64	0	0.2667	0	12	0.00021	0	NA	NA
chr6	277511	277575	64	0	0.2667	0	12	0.00021	0	NA	NA
chr1	2205021	2209556	4535	0	0.2667	0	12	0.00021	0	NA	NA
chr19	262654	262723	69	0.2667	0	12	0	0.00021	Inf	NA	NA	MIER2				1
chr13	266625	266750	125	0.2667	0	12	0	0.00021	Inf	NA	NA
chr13	1020856	1022719	1863	0.2667	0	12	0	0.00021	Inf	NA	NA
chr21	660034	662008	1974	0.2667	0	12	0	0.00021	Inf	NA	NA
chr15	1120862	1127312	6450	0.2667	0	12	0	0.00021	Inf	NA	NA
chr13	778375	782499	4124	0.2667	0	12	0	0.00021	Inf	NA	NA
chr1	2222579	2228432	5853	0.2667	0	12	0	0.00021	Inf	NA	NA
chr13	112313259	112313311	52	0.5111	0.1333	23	6	0.000234	6.79711	NA	NA	MCF2L				1
chr4	191563403	191563695	292	0.1333	0.5111	6	23	0.000234	0.147121	NA	NA
chr9	148218654	148218936	282	0.1333	0.5111	6	23	0.000234	0.147121	NA	NA
chr17	23467504	23469883	2379	0.1333	0.5111	6	23	0.000234	0.147121	NA	NA
chr17	16398	23012	6614	0.5111	0.1333	23	6	0.000234	6.79711	NA	NA
chr6	169575599	169576684	1085	0.4889	0.8667	22	39	0.000234	0.147121	0.0543	0.01472
chr1	207935596	207935656	60	0.3778	0.7778	17	35	0.000237	0.173463	0.00016	5e-05
chr10	49140932	49141039	107	0.6222	0.2222	28	10	0.000237	5.7649	NA	NA
chr4	41416953	41417053	100	0.7778	0.3778	35	17	0.000237	5.7649	0.38447	0.30277	LIMCH1				1
chrX	23183741	23183815	74	0.6222	0.2222	28	10	0.000237	5.7649	0.45924	0.21389
chr7	150048281	150048335	54	0.4444	0.0889	20	4	0.000241	8.1974	NA	NA	EZH2				1
chr3	104145899	104146074	175	0.4444	0.0889	20	4	0.000241	8.1974	NA	NA	SENP7				1
chr20	42714223	42714355	132	0.4444	0.0889	20	4	0.000241	8.1974	0.00032	0.00029
chr17	84240778	84241671	893	0.4444	0.0889	20	4	0.000241	8.1974	NA	NA
chr7	57039867	57041561	1694	0.4444	0.0889	20	4	0.000241	8.1974	NA	NA
chr10	133194517	133194572	55	0.6444	0.2444	29	11	0.000262	5.60253	NA	NA	STK32C				1
chr13	100469679	100469999	320	0.2444	0.6444	11	29	0.000262	0.178491	0.25385	0.38559	NALCN				1
chr7	63616727	63617409	682	0.7556	0.3556	34	16	0.000262	5.60253	NA	NA
chr7	106289466	106289791	325	0.6667	0.2667	30	12	0.000279	5.49989	0.2529	0.13057
chr19	43740707	43740773	66	0.2667	0.6667	12	30	0.000279	0.181822	NA	NA
chr6	33650797	33650904	107	0.2667	0.6667	12	30	0.000279	0.181822	NA	NA
chr9	47265794	47266474	680	0.2667	0.6667	12	30	0.000279	0.181822	NA	NA
chr7	57039123	57040865	1742	0.2667	0.6667	12	30	0.000279	0.181822	NA	NA
chr19	26327530	26328551	1021	0.6667	0.2667	30	12	0.000279	5.49989	NA	NA
chr22	2068374	2074295	5921	0.6667	0.2667	30	12	0.000279	5.49989	NA	NA
chr21	515777	517956	2179	0.2667	0.6667	12	30	0.000279	0.181822	NA	NA
chr11	57666477	57666575	98	0.2889	0.6889	13	31	0.000288	0.183468	NA	NA	TMX2				1
chr18	19641746	19642422	676	0.2889	0.6889	13	31	0.000288	0.183468	NA	NA
chr22	2064113	2066087	1974	0.6889	0.2889	31	13	0.000288	5.45054	NA	NA
chr9	101568627	101568723	96	0.5333	0.1556	24	7	0.000308	6.20115	0.03887	0.0082	SEMA4D				1
chr18	79812268	79812328	60	0.5333	0.1556	24	7	0.000308	6.20115	NA	NA
chr7	85336532	85336621	89	0.4667	0.8444	21	38	0.000308	0.16126	NA	NA	SEMA3A				1
chr8	139431412	139431725	313	0.5333	0.1556	24	7	0.000308	6.20115	NA	NA	FAM135B				1
chr2	91252973	91253237	264	0.8444	0.4667	38	21	0.000308	6.20115	NA	NA
chr11	134779326	134779938	612	0.5333	0.1556	24	7	0.000308	6.20115	NA	NA
chr1	128759082	128760395	1313	0.8444	0.4667	38	21	0.000308	6.20115	NA	NA
chr11	18364343	18364397	54	0.4667	0.8444	21	38	0.000308	0.16126	NA	NA	SAA1				1
chr9	47385863	47386372	509	0.1556	0.5333	7	24	0.000308	0.16126	NA	NA
chr2	234930044	234930099	55	0.4	0.0667	18	3	0.000317	9.32834	NA	NA
chr2	194837759	194837832	73	0.4	0.0667	18	3	0.000317	9.32834	NA	NA
chrX	149831091	149831168	77	0.0667	0.4	3	18	0.000317	0.1072	NA	NA
chr2	91195323	91195401	78	0.9333	0.6	42	27	0.000317	9.32834	NA	NA
chr5	97123590	97124488	898	0.4	0.0667	18	3	0.000317	9.32834	NA	NA	CAST				1
chr3	104351327	104353509	2182	0.4	0.0667	18	3	0.000317	9.32834	0.12577	0.16176
chr16	16173082	16173168	86	0.4	0.0667	18	3	0.000317	9.32834	NA	NA	ABCC6				1
chrX	58811661	58813718	2057	0.0667	0.4	3	18	0.000317	0.1072	NA	NA
chr7	58722930	58725033	2103	0.0667	0.4	3	18	0.000317	0.1072	NA	NA
chr7	57057376	57060964	3588	0.0667	0.4	3	18	0.000317	0.1072	NA	NA
chr17	22064002	22064737	735	0.4	0.0667	18	3	0.000317	9.32834	NA	NA
chr18	21025196	21026547	1351	0.4	0.0667	18	3	0.000317	9.32834	NA	NA
chr22	12972640	12974004	1364	0.4	0.0667	18	3	0.000317	9.32834	NA	NA
chr22	14908113	14912205	4092	0.4	0.0667	18	3	0.000317	9.32834	NA	NA
chr22	3161765	3163262	1497	0.4	0.0667	18	3	0.000317	9.32834	NA	NA
chr1	191293969	191296078	2109	0.4	0.0667	18	3	0.000317	9.32834	0.13189	0.0512
chr5	119053743	119053809	66	0.0222	0.3111	1	14	0.000343	0.0502758	8e-05	0.00012
chr8	69333011	69333147	136	0.3111	0.0222	14	1	0.000343	19.8903	NA	NA
chr2	94284733	94285075	342	0.3111	0.0222	14	1	0.000343	19.8903	NA	NA
chr11	116144312	116145018	706	0.3111	0.0222	14	1	0.000343	19.8903	NA	NA
chr18	43867166	43867280	114	0.3111	0.0222	14	1	0.000343	19.8903	NA	NA
chr22	38652763	38652853	90	0.0222	0.3111	1	14	0.000343	0.0502758	NA	NA	PLA2G6				1
chr9	44855996	44856169	173	0.3111	0.0222	14	1	0.000343	19.8903	NA	NA
chr16	39636766	39637192	426	0.3111	0.0222	14	1	0.000343	19.8903	NA	NA
chr19	24621357	24621527	170	0.3111	0.0222	14	1	0.000343	19.8903	NA	NA
chr5	49651551	49652245	694	0.3111	0.0222	14	1	0.000343	19.8903	NA	NA
chr18	20135266	20135608	342	0.3111	0.0222	14	1	0.000343	19.8903	NA	NA
chr8	44269153	44271021	1868	0.0222	0.3111	1	14	0.000343	0.0502758	NA	NA
chr18	16234441	16235116	675	0.0222	0.3111	1	14	0.000343	0.0502758	NA	NA
chr15	19557917	19559171	1254	0.0222	0.3111	1	14	0.000343	0.0502758	NA	NA
chr20	3258982	3259036	54	0.0222	0.3111	1	14	0.000343	0.0502758	NA	NA	SLC4A11				1
chr22	13002213	13006298	4085	0.3111	0.0222	14	1	0.000343	19.8903	NA	NA
chr12	2725516	2726080	564	0.3111	0.0222	14	1	0.000343	19.8903	0.00734	0.00353
chrY	1651107	1651706	599	0.3111	0.0222	14	1	0.000343	19.8903	NA	NA
chr5	948845	949459	614	0.3111	0.0222	14	1	0.000343	19.8903	NA	NA
chr22	46974969	46975157	188	0.1111	0.4667	5	21	0.000364	0.142822	NA	NA	CELSR1				1
chr8	46172715	46173390	675	0.5333	0.8889	24	40	0.000364	0.142822	NA	NA
chr5	46835806	46837166	1360	0.1111	0.4667	5	21	0.000364	0.142822	NA	NA
chr18	19809898	19810572	674	0.4667	0.1111	21	5	0.000364	7.00173	NA	NA
chr8	3425839	3425922	83	0.1111	0.4667	5	21	0.000364	0.142822	NA	NA	CSMD1				1
chr18	6433101	6433921	820	0.4667	0.1111	21	5	0.000364	7.00173	0.08559	0.08477	L3MBTL4				1
chr1	197752505	197752612	107	0.3556	0.0444	16	2	0.000365	11.8768	0.05037	0.04338
chr4	89468432	89468483	51	0.9556	0.6444	43	29	0.000365	11.8768	NA	NA	MAPK10				1
chr2	240310892	240311522	630	0.3556	0.0444	16	2	0.000365	11.8768	NA	NA
chr1	83646565	83646696	131	0.3556	0.0444	16	2	0.000365	11.8768	0.18572	0.01493
chr4	60181411	60181547	136	0.3556	0.0444	16	2	0.000365	11.8768	NA	NA
chr7	73427235	73427706	471	0.3556	0.0444	16	2	0.000365	11.8768	NA	NA	CALN1				1
chr20	30802944	30804477	1533	0.9556	0.6444	43	29	0.000365	11.8768	NA	NA
chr7	5009008	5009103	95	0.3556	0.0444	16	2	0.000365	11.8768	NA	NA
chr7	577808	577882	74	0.3556	0.0444	16	2	0.000365	11.8768	NA	NA
chr2	130490708	130490903	195	0.1778	0.5556	8	25	0.000383	0.172968	NA	NA
chr14	64603865	64603923	58	0.8222	0.4444	37	20	0.000383	5.78141	NA	NA	COX16				1	SYNJ2BP				1
chr2	10262415	10262525	110	0.1778	0.5556	8	25	0.000383	0.172968	NA	NA
chr15	1344700	1345236	536	0.5556	0.1778	25	8	0.000383	5.78141	NA	NA
chr20	49649886	49650765	879	0.1778	0.5556	8	25	0.000383	0.172968	NA	NA
chr4	168728094	168728148	54	0.4222	0.8	19	36	0.000457	0.182676	NA	NA	CPE				1
chr11	126307456	126307563	107	0.2	0.5778	9	26	0.000457	0.182676	NA	NA	FOXRED1				1
chr7	76780774	76780837	63	0.8	0.4222	36	19	0.000457	5.47418	NA	NA
chr9	123812284	123812527	243	0.5778	0.2	26	9	0.000457	5.47418	NA	NA	DNAJC25				1
chr15	29773815	29773913	98	0.2	0.5778	9	26	0.000457	0.182676	NA	NA	CHRNA7				1
chrX	140454	140551	97	0.2	0.5778	9	26	0.000457	0.182676	NA	NA	GTPBP6				1
chr10	41780410	41785161	4751	0.8	0.4222	36	19	0.000457	5.47418	NA	NA
chr3	198333287	198333347	60	0.2444	0	11	0	0.000488	Inf	NA	NA
chr2	184001608	184001674	66	0.2444	0	11	0	0.000488	Inf	8e-05	2e-05
chr5	170200337	170200433	96	0	0.2444	0	11	0.000488	0	NA	NA	DOCK2				1
chr7	114830290	114830342	52	0.2444	0	11	0	0.000488	Inf	NA	NA
chr1	128335200	128335267	67	0	0.2444	0	11	0.000488	0	NA	NA
chr6	114593296	114593362	66	0	0.2444	0	11	0.000488	0	NA	NA
chr1	194917824	194918041	217	0.2444	0	11	0	0.000488	Inf	NA	NA
chr7	105223726	105223797	71	0.2444	0	11	0	0.000488	Inf	NA	NA	RELN				1
chr7	126886706	126886815	109	0.2444	0	11	0	0.000488	Inf	NA	NA
chr1	245492608	245493006	398	0	0.2444	0	11	0.000488	0	0.00756	0.00642	SMYD3				1
chr9	150039239	150039392	153	0	0.2444	0	11	0.000488	0	NA	NA	EHMT1				1
chr12	87992247	87992319	72	0.2444	0	11	0	0.000488	Inf	NA	NA	C12orf50				1
chr6	96239724	96239818	94	0.2444	0	11	0	0.000488	Inf	NA	NA
chr17	79005735	79005809	74	0.2444	0	11	0	0.000488	Inf	NA	NA	TMC6			1
chrX	76706631	76706704	73	0.2444	0	11	0	0.000488	Inf	NA	NA
chr14	64618508	64618566	58	0.2444	0	11	0	0.000488	Inf	NA	NA	COX16				1	SYNJ2BP				1
chr4	190319067	190319593	526	0	0.2444	0	11	0.000488	0	NA	NA
chrX	67026563	67026632	69	0.2444	0	11	0	0.000488	Inf	NA	NA
chr10	114977318	114977523	205	0	0.2444	0	11	0.000488	0	NA	NA
chr18	79921136	79921247	111	0	0.2444	0	11	0.000488	0	NA	NA
chr20	65251971	65252049	78	0.2444	0	11	0	0.000488	Inf	NA	NA	KCNQ2				1
chr11	55341659	55341718	59	0	0.2444	0	11	0.000488	0	NA	NA
chr2	87421639	87421799	160	0	0.2444	0	11	0.000488	0	NA	NA
chr7	74268524	74268648	124	0	0.2444	0	11	0.000488	0	NA	NA
chr18	79255820	79255979	159	0	0.2444	0	11	0.000488	0	NA	NA
chrX	82449879	82450053	174	0.2444	0	11	0	0.000488	Inf	NA	NA
chr16	94391079	94391319	240	0	0.2444	0	11	0.000488	0	NA	NA
chr20	49719537	49719616	79	0.2444	0	11	0	0.000488	Inf	0	4e-05
chr12	129570630	129571231	601	0.2444	0	11	0	0.000488	Inf	NA	NA	TMEM132D				1
chr13	91064454	91064759	305	1	0.7556	45	34	0.000488	Inf	NA	NA	GPC5				1
chr17	83990155	83990419	264	0.2444	0	11	0	0.000488	Inf	NA	NA	B3GNTL1				1
chr9	49225486	49225579	93	0	0.2444	0	11	0.000488	0	NA	NA
chr6	69709642	69709829	187	0	0.2444	0	11	0.000488	0	NA	NA
chr1	49826741	49826843	102	0.2444	0	11	0	0.000488	Inf	NA	NA	AGBL4				1
chr17	41919266	41919355	89	0.2444	0	11	0	0.000488	Inf	NA	NA	KRTAP2-2	2		1
chr19	43995486	43995585	99	0.2444	0	11	0	0.000488	Inf	NA	NA
chr15	47298183	47298307	124	0.2444	0	11	0	0.000488	Inf	NA	NA	FAM227B				1
chr7	29029462	29029514	52	0.2444	0	11	0	0.000488	Inf	NA	NA
chr3	26642078	26642129	51	0.2444	0	11	0	0.000488	Inf	NA	NA	LRRC3B				1
chr2	94596507	94597187	680	0.2444	0	11	0	0.000488	Inf	NA	NA
chr2	94605776	94606456	680	0.2444	0	11	0	0.000488	Inf	NA	NA
chr2	94374680	94375360	680	0	0.2444	0	11	0.000488	0	NA	NA
chr12	132433012	132434374	1362	0.2444	0	11	0	0.000488	Inf	0.00776	0.00044
chr13	111535652	111536705	1053	0.2444	0	11	0	0.000488	Inf	NA	NA
chr10	36785754	36785871	117	0.2444	0	11	0	0.000488	Inf	NA	NA
chr22	23174762	23174815	53	0.2444	0	11	0	0.000488	Inf	NA	NA
chr18	38760089	38760239	150	0.2444	0	11	0	0.000488	Inf	NA	NA
chr8	145021449	145024641	3192	0.2444	0	11	0	0.000488	Inf	NA	NA	EPPK1	3
chr3	94766723	94768215	1492	0.2444	0	11	0	0.000488	Inf	NA	NA
chr5	24181875	24181975	100	0	0.2444	0	11	0.000488	0	NA	NA
chr2	94639855	94641557	1702	0.2444	0	11	0	0.000488	Inf	NA	NA
chr3	91245551	91247249	1698	0.2444	0	11	0	0.000488	Inf	NA	NA
chr3	91142845	91144544	1699	0.2444	0	11	0	0.000488	Inf	NA	NA
chr6	161904341	161909893	5552	0.2444	0	11	0	0.000488	Inf	NA	NA	LPA				1
chr6	52600262	52600859	597	0.2444	0	11	0	0.000488	Inf	0.25223	0.00134	GSTA2				1
chr4	36875023	36875348	325	0.2444	0	11	0	0.000488	Inf	NA	NA
chr18	79875250	79876790	1540	0	0.2444	0	11	0.000488	0	0.10258	0.11062
chr18	79880174	79881726	1552	0.2444	0	11	0	0.000488	Inf	NA	NA
chr18	79883463	79885438	1975	0.2444	0	11	0	0.000488	Inf	NA	NA
chr19	15905187	15905267	80	0	0.2444	0	11	0.000488	0	NA	NA
chr15	12310333	12310384	51	0.2444	0	11	0	0.000488	Inf	NA	NA
chr2	41752717	41753351	634	0	0.2444	0	11	0.000488	0	NA	NA
chr10	41897980	41898659	679	0	0.2444	0	11	0.000488	0	NA	NA
chr19	29374584	29374924	340	0.2444	0	11	0	0.000488	Inf	NA	NA
chr19	28596062	28596402	340	0.2444	0	11	0	0.000488	Inf	NA	NA
chr19	28515946	28516286	340	0.2444	0	11	0	0.000488	Inf	NA	NA
chr19	25973467	25973807	340	0.2444	0	11	0	0.000488	Inf	NA	NA
chr4	15849513	15849640	127	0	0.2444	0	11	0.000488	0	NA	NA
chr2	10309660	10309714	54	0	0.2444	0	11	0.000488	0	NA	NA
chrX	60874088	60875977	1889	0.2444	0	11	0	0.000488	Inf	NA	NA
chrX	60903070	60905127	2057	0.2444	0	11	0	0.000488	Inf	NA	NA
chr7	60640481	60642525	2044	0.2444	0	11	0	0.000488	Inf	NA	NA
chrX	59521969	59524026	2057	0	0.2444	0	11	0.000488	0	NA	NA
chrX	58859369	58861426	2057	0.2444	0	11	0	0.000488	Inf	NA	NA
chr9	45518878	45520238	1360	0	0.2444	0	11	0.000488	0	NA	NA
chr9	45145812	45147172	1360	0	0.2444	0	11	0.000488	0	NA	NA
chr7	59766533	59769267	2734	0.2444	0	11	0	0.000488	Inf	NA	NA
chr19	15906257	15906453	196	0	0.2444	0	11	0.000488	0	NA	NA
chr19	29842832	29843523	691	0	0.2444	0	11	0.000488	0	NA	NA
chr9	48689305	48691189	1884	0.2444	0	11	0	0.000488	Inf	NA	NA
chr18	79888229	79893420	5191	0.2444	0	11	0	0.000488	Inf	NA	NA
chr15	25130018	25130564	546	0.2444	0	11	0	0.000488	Inf	0.09659	0.07079	GABRG3				1
chr20	32225251	32226181	930	0.2444	0	11	0	0.000488	Inf	NA	NA
chr20	32224172	32225142	970	0.2444	0	11	0	0.000488	Inf	NA	NA
chr10	42893991	42895807	1816	0.2444	0	11	0	0.000488	Inf	NA	NA
chr10	42892427	42894243	1816	0.2444	0	11	0	0.000488	Inf	NA	NA
chr5	46686442	46688662	2220	0.2444	0	11	0	0.000488	Inf	NA	NA
chr5	50013320	50016053	2733	0.2444	0	11	0	0.000488	Inf	NA	NA
chr21	7109004	7109063	59	0.2444	0	11	0	0.000488	Inf	NA	NA
chr19	29367269	29368289	1020	0.2444	0	11	0	0.000488	Inf	NA	NA
chr22	25098548	25099318	770	0.2444	0	11	0	0.000488	Inf	0.00557	0.00024
chr19	28590871	28591891	1020	0.2444	0	11	0	0.000488	Inf	NA	NA
chr18	16358252	16358588	336	0	0.2444	0	11	0.000488	0	NA	NA
chr18	16359502	16359844	342	0	0.2444	0	11	0.000488	0	NA	NA
chr18	19601189	19601864	675	0	0.2444	0	11	0.000488	0	NA	NA
chr19	26355646	26357005	1359	0.2444	0	11	0	0.000488	Inf	NA	NA
chr19	29357258	29358954	1696	0.2444	0	11	0	0.000488	Inf	NA	NA
chr19	50883610	50888956	5346	0	0.2444	0	11	0.000488	0	NA	NA
chr9	28859572	28861308	1736	0	0.2444	0	11	0.000488	0	0.09307	0.08902
chr15	17644027	17644706	679	0.2444	0	11	0	0.000488	Inf	NA	NA
chr18	19803362	19804380	1018	0	0.2444	0	11	0.000488	0	NA	NA
chr12	19664473	19665720	1247	0	0.2444	0	11	0.000488	0	NA	NA
chr17	26877399	26880115	2716	0.2444	0	11	0	0.000488	Inf	NA	NA
chr18	20890838	20892869	2031	0	0.2444	0	11	0.000488	0	NA	NA
chr15	13519291	13520171	880	0.2444	0	11	0	0.000488	Inf	NA	NA
chr22	15571346	15572710	1364	0.2444	0	11	0	0.000488	Inf	NA	NA
chr22	15400535	15401898	1363	0	0.2444	0	11	0.000488	0	NA	NA
chr18	17136188	17137880	1692	0	0.2444	0	11	0.000488	0	NA	NA
chr20	32846631	32853317	6686	0.2444	0	11	0	0.000488	Inf	NA	NA
chr18	20692985	20695703	2718	0	0.2444	0	11	0.000488	0	NA	NA
chr22	12987464	12988826	1362	0.2444	0	11	0	0.000488	Inf	NA	NA
chr13	12383792	12385197	1405	0	0.2444	0	11	0.000488	0	NA	NA
chr15	13505725	13507608	1883	0.2444	0	11	0	0.000488	Inf	NA	NA
chr22	16857148	16860208	3060	0.2444	0	11	0	0.000488	Inf	NA	NA
chr15	16684652	16688049	3397	0.2444	0	11	0	0.000488	Inf	NA	NA
chr9	48699981	48731433	31452	0.2444	0	11	0	0.000488	Inf	NA	NA
chr22	14938454	14942542	4088	0.2444	0	11	0	0.000488	Inf	NA	NA
chr22	3050894	3051104	210	0.2444	0	11	0	0.000488	Inf	NA	NA
chr15	8684619	8686428	1809	0.2444	0	11	0	0.000488	Inf	NA	NA
chr22	13009920	13014010	4090	0.2444	0	11	0	0.000488	Inf	NA	NA
chr16	3224332	3224602	270	0.2444	0	11	0	0.000488	Inf	NA	NA
chr15	6378988	6380782	1794	0.2444	0	11	0	0.000488	Inf	NA	NA
chr12	6313133	6314893	1760	0	0.2444	0	11	0.000488	0	NA	NA
chr22	2767691	2768064	373	0	0.2444	0	11	0.000488	0	NA	NA
chr13	3233183	3233770	587	0	0.2444	0	11	0.000488	0	NA	NA
chr22	3085376	3086001	625	0.2444	0	11	0	0.000488	Inf	NA	NA
chr15	993060	993128	68	0	0.2444	0	11	0.000488	0	NA	NA
chr15	5548559	5551018	2459	0.2444	0	11	0	0.000488	Inf	NA	NA
chr22	6908534	6913374	4840	0	0.2444	0	11	0.000488	0	NA	NA
chr15	6359880	6366984	7104	0.2444	0	11	0	0.000488	Inf	NA	NA
chr21	1153790	1154035	245	0	0.2444	0	11	0.000488	0	NA	NA
chr15	1411877	1412380	503	0.2444	0	11	0	0.000488	Inf	NA	NA
chr2	424354	424414	60	0.2444	0	11	0	0.000488	Inf	NA	NA
chr19	524197	524307	110	0.2444	0	11	0	0.000488	Inf	NA	NA
chr22	1976406	1978380	1974	0.2444	0	11	0	0.000488	Inf	NA	NA
chr11	328809	328931	122	0	0.2444	0	11	0.000488	0	NA	NA
chr22	2176611	2185182	8571	0.2444	0	11	0	0.000488	Inf	NA	NA
chr14	994680	997927	3247	0.2444	0	11	0	0.000488	Inf	NA	NA
chr17	232643	233803	1160	0	0.2444	0	11	0.000488	0	NA	NA
chrY	26758	26819	61	0	0.2444	0	11	0.000488	0	NA	NA
chr2	117475933	117475989	56	0.8667	0.5111	39	23	0.000506	6.21946	NA	NA
chr1	128674299	128674414	115	0.4889	0.1333	22	6	0.000506	6.21946	NA	NA
chr2	71175623	71175684	61	0.1333	0.4889	6	22	0.000506	0.160786	NA	NA
chr13	108994172	108995298	1126	0.5111	0.8667	23	39	0.000506	0.160786	0.433	0.42912	IRS2				1
chr7	63649769	63650448	679	0.4889	0.1333	22	6	0.000506	6.21946	NA	NA
chr10	36688704	36689008	304	0.5111	0.8667	23	39	0.000506	0.160786	NA	NA
chr19	29526662	29527002	340	0.4889	0.1333	22	6	0.000506	6.21946	NA	NA
chr9	49186670	49189817	3147	0.1333	0.4889	6	22	0.000506	0.160786	NA	NA
chr2	241608145	241608226	81	0.4222	0.0889	19	4	0.000523	7.48867	0.00016	0.0001	PASK				1
chr4	193004037	193004182	145	0.2222	0.6	10	27	0.000523	0.190452	NA	NA
chr10	132799999	132800085	86	0.4222	0.0889	19	4	0.000523	7.48867	NA	NA
chr12	110068842	110068917	75	0.6	0.2222	27	10	0.000523	5.25068	NA	NA
chr3	104435895	104435981	86	0.4222	0.0889	19	4	0.000523	7.48867	NA	NA
chr2	75721352	75721512	160	0.2222	0.6	10	27	0.000523	0.190452	NA	NA
chr7	45121303	45121374	71	0.4	0.7778	18	35	0.000523	0.190452	0.01364	0.00655
chr15	70163671	70163992	321	0.4222	0.0889	19	4	0.000523	7.48867	NA	NA	HEXA				1
chr11	60573645	60573899	254	0.2222	0.6	10	27	0.000523	0.190452	NA	NA
chr8	62441637	62441948	311	0.6	0.2222	27	10	0.000523	5.25068	0.26751	0.25276
chr12	31799119	31799433	314	0.7778	0.4	35	18	0.000523	5.25068	NA	NA
chr9	23334653	23334973	320	0.4222	0.0889	19	4	0.000523	7.48867	NA	NA
chr16	64432407	64435908	3501	0.4222	0.0889	19	4	0.000523	7.48867	0.24798	0.15323
chr10	1096566	1096633	67	0.4222	0.0889	19	4	0.000523	7.48867	NA	NA	WDR37				1
chr1	89138962	89139022	60	0.3778	0.7556	17	34	0.000579	0.1964	NA	NA
chr20	63464710	63464762	52	0.2444	0.6222	11	28	0.000579	0.1964	NA	NA	CDH4				1
chr16	94682632	94682854	222	0.6222	0.2444	28	11	0.000579	5.09165	NA	NA	ZC3H18				1
chr8	20387846	20388187	341	0.6222	0.2444	28	11	0.000579	5.09165	0.31174	0.20192
chr7	111121477	111138681	17204	0.3778	0.7556	17	34	0.000579	0.1964	0.41448	0.36114
chr18	19806317	19807677	1360	0.2444	0.6222	11	28	0.000579	0.1964	NA	NA
chr10	714570	716738	2168	0.3778	0.7556	17	34	0.000579	0.1964	0	9e-05
chr2	134449283	134449383	100	0.3556	0.7333	16	33	0.000622	0.2007	NA	NA
chr13	113333874	113333950	76	0.7333	0.3556	33	16	0.000622	4.98256	NA	NA	RASA3				1
chr13	113333836	113333912	76	0.2667	0.6444	12	29	0.000622	0.2007	NA	NA	RASA3				1
chr6	169660615	169660838	223	0.3556	0.7333	16	33	0.000622	0.2007	NA	NA	DACT2				1
chr8	109846428	109846755	327	0.6444	0.2667	29	12	0.000622	4.98256	0.31301	0.19728	TMEM74				1
chrX	27118319	27118380	61	0.6444	0.2667	29	12	0.000622	4.98256	NA	NA
chr9	11875363	11875585	222	0.7333	0.3556	33	16	0.000622	4.98256	NA	NA
chr17	38385717	38388852	3135	0.2667	0.6444	12	29	0.000622	0.2007	0.0031	0.00012	ACACA				1
chr15	98294060	98294130	70	0.2889	0.6667	13	30	0.000648	0.203106	NA	NA	CERS3				1
chr3	104436081	104436219	138	0.2889	0.6667	13	30	0.000648	0.203106	NA	NA
chr9	85274657	85274774	117	0.3333	0.7111	15	32	0.000648	0.203106	NA	NA
chr6	32095702	32095762	60	0.2889	0.6667	13	30	0.000648	0.203106	NA	NA
chr2	16175117	16175225	108	0.7111	0.3333	32	15	0.000648	4.92355	NA	NA
chr21	10941464	10942219	755	0.7111	0.3333	32	15	0.000648	4.92355	NA	NA
chr5	1099150	1099342	192	0.3333	0.7111	15	32	0.000648	0.203106	0.00092	0.00046
chr11	66388287	66390982	2695	0.6889	0.3111	31	14	0.000657	4.90357	NA	NA
chr3	193196530	193196593	63	0.5111	0.1556	23	7	0.000659	5.67315	NA	NA	CLDN16				1
chr4	188814687	188814909	222	0.1556	0.5111	7	23	0.000659	0.176269	NA	NA	CCDC110				1
chr2	128661853	128662000	147	0.1556	0.5111	7	23	0.000659	0.176269	NA	NA
chr6	68333828	68333916	88	0.4889	0.8444	22	38	0.000659	0.176269	NA	NA
chr4	42626750	42626897	147	0.4889	0.8444	22	38	0.000659	0.176269	0.0041	0.0039	ATP8A1				1
chr8	64422914	64423465	551	0.5111	0.1556	23	7	0.000659	5.67315	0.11387	0.09181
chr14	18672467	18672586	119	0.5111	0.1556	23	7	0.000659	5.67315	NA	NA
chr8	46104002	46104848	846	0.1556	0.5111	7	23	0.000659	0.176269	NA	NA
chr13	24368274	24368552	278	0.1556	0.5111	7	23	0.000659	0.176269	NA	NA
chr10	5580764	5581156	392	0.5111	0.1556	23	7	0.000659	5.67315	9e-05	4e-05
chr13	308464	309005	541	0.5111	0.1556	23	7	0.000659	5.67315	NA	NA
chr13	97836312	97836364	52	0.6222	0.9333	28	42	0.000685	0.117699	NA	NA
chr13	110931232	110931334	102	0.0667	0.3778	3	17	0.000685	0.117699	NA	NA
chr9	149561697	149561949	252	0.0667	0.3778	3	17	0.000685	0.117699	NA	NA	EXD3				1
chr12	71541682	71541760	78	0.3778	0.0667	17	3	0.000685	8.49625	NA	NA	LGR5				1
chr18	80055479	80055584	105	0.0667	0.3778	3	17	0.000685	0.117699	NA	NA
chr9	49057326	49057381	55	0.3778	0.0667	17	3	0.000685	8.49625	NA	NA
chr9	48927432	48927501	69	0.6222	0.9333	28	42	0.000685	0.117699	NA	NA
chr11	68352790	68352970	180	0.3778	0.0667	17	3	0.000685	8.49625	0.03522	0.01031	LRP5				1
chr18	49959417	49959513	96	0.3778	0.0667	17	3	0.000685	8.49625	NA	NA
chr22	47666260	47666368	108	0.3778	0.0667	17	3	0.000685	8.49625	NA	NA
chr2	94605932	94606612	680	0.0667	0.3778	3	17	0.000685	0.117699	NA	NA
chr6	30610743	30610905	162	0.0667	0.3778	3	17	0.000685	0.117699	NA	NA
chr17	15882014	15882080	66	0.3778	0.0667	17	3	0.000685	8.49625	NA	NA	ZSWIM7				1
chr19	29246318	29246997	679	0.0667	0.3778	3	17	0.000685	0.117699	NA	NA
chr19	28341015	28341695	680	0.3778	0.0667	17	3	0.000685	8.49625	NA	NA
chr9	47327169	47329379	2210	0.0667	0.3778	3	17	0.000685	0.117699	NA	NA
chr17	26738829	26740528	1699	0.0667	0.3778	3	17	0.000685	0.117699	NA	NA
chr10	42253151	42260278	7127	0.3778	0.0667	17	3	0.000685	8.49625	NA	NA
chr12	2725590	2725642	52	0.6222	0.9333	28	42	0.000685	0.117699	NA	NA
chr1	16042928	16049217	6289	0.3778	0.0667	17	3	0.000685	8.49625	NA	NA
chr20	2853016	2856437	3421	0.9333	0.6222	42	28	0.000685	8.49625	0.62218	0.46181
chr13	450147	450567	420	0.3778	0.0667	17	3	0.000685	8.49625	NA	NA
chr22	2207885	2225581	17696	0.3778	0.0667	17	3	0.000685	8.49625	NA	NA
chr13	803021	806625	3604	0.0667	0.3778	3	17	0.000685	0.117699	NA	NA
chr8	95732071	95732127	56	0.0222	0.2889	1	13	0.000764	0.0558838	NA	NA
chr13	103699109	103699183	74	0.0222	0.2889	1	13	0.000764	0.0558838	NA	NA
chr2	119878284	119878384	100	0.2889	0.0222	13	1	0.000764	17.8943	NA	NA	SCTR				1
chr3	197590142	197590458	316	0.0222	0.2889	1	13	0.000764	0.0558838	0.34109	0.24302
chr13	108922726	108922822	96	0.0222	0.2889	1	13	0.000764	0.0558838	NA	NA
chrX	138171725	138172047	322	0.2889	0.0222	13	1	0.000764	17.8943	0.21934	0.02189	ATP11C				1
chr11	102734182	102734857	675	0.2889	0.0222	13	1	0.000764	17.8943	NA	NA
chr7	63683803	63684145	342	0.2889	0.0222	13	1	0.000764	17.8943	NA	NA
chr7	63576880	63577222	342	0.2889	0.0222	13	1	0.000764	17.8943	NA	NA
chr19	54042287	54042609	322	0.2889	0.0222	13	1	0.000764	17.8943	NA	NA
chr7	18059767	18059833	66	0.7111	0.9778	32	44	0.000764	0.0558838	0.48873	0.50797	SNX13				1
chr9	46362737	46363249	512	0.2889	0.0222	13	1	0.000764	17.8943	NA	NA
chr13	33033655	33034007	352	0.2889	0.0222	13	1	0.000764	17.8943	0.1654	0.07051
chr19	28287334	28287670	336	0.2889	0.0222	13	1	0.000764	17.8943	NA	NA
chr10	42286061	42286871	810	0.2889	0.0222	13	1	0.000764	17.8943	NA	NA
chr9	47532930	47534122	1192	0.2889	0.0222	13	1	0.000764	17.8943	NA	NA
chr12	34723810	34724489	679	0.0222	0.2889	1	13	0.000764	0.0558838	NA	NA
chr18	19816875	19817216	341	0.2889	0.0222	13	1	0.000764	17.8943	NA	NA
chr20	31751842	31753036	1194	0.2889	0.0222	13	1	0.000764	17.8943	NA	NA
chr20	30691795	30693162	1367	0.2889	0.0222	13	1	0.000764	17.8943	NA	NA
chr19	28370439	28371795	1356	0.2889	0.0222	13	1	0.000764	17.8943	NA	NA
chr15	19548083	19548836	753	0.0222	0.2889	1	13	0.000764	0.0558838	NA	NA
chr2	3608029	3608089	60	0.2889	0.0222	13	1	0.000764	17.8943	0	5e-05
chr22	12931109	12932472	1363	0.2889	0.0222	13	1	0.000764	17.8943	NA	NA
chr1	2133642	2133722	80	0.0222	0.2889	1	13	0.000764	0.0558838	NA	NA
chr19	1895050	1895191	141	0.2889	0.0222	13	1	0.000764	17.8943	0.36483	0.34517	SCAMP4				1
chrY	1171517	1171594	77	0.2889	0.0222	13	1	0.000764	17.8943	NA	NA
chr11	1725723	1726194	471	0.0222	0.2889	1	13	0.000764	0.0558838	NA	NA
chr10	604479	604548	69	0.2889	0.0222	13	1	0.000764	17.8943	NA	NA	DIP2C				1
chr8	471869	471953	84	0.0222	0.2889	1	13	0.000764	0.0558838	NA	NA	ERICH1				1
chr1	728920	729280	360	0.2889	0.0222	13	1	0.000764	17.8943	NA	NA	ACAP3				1
chr14	1098421	1099370	949	0.2889	0.0222	13	1	0.000764	17.8943	NA	NA
chr14	98490861	98492596	1735	0.0222	0.2889	1	13	0.000764	0.0558838	NA	NA
chr10	61324291	61324349	58	0.4444	0.1111	20	5	0.000775	6.39957	NA	NA	ANK3				1
chr1	123348770	123349110	340	0.1111	0.4444	5	20	0.000775	0.156261	NA	NA
chr17	69841702	69842036	334	0.8889	0.5556	40	25	0.000775	6.39957	0.52636	0.40592
chr2	92333180	92333862	682	0.8889	0.5556	40	25	0.000775	6.39957	NA	NA
chr2	131291783	131295262	3479	0.4444	0.1111	20	5	0.000775	6.39957	0.00056	0.0001	ARHGEF4				1
chr18	20902651	20902822	171	0.1111	0.4444	5	20	0.000775	0.156261	NA	NA
chr20	49657949	49659217	1268	0.1111	0.4444	5	20	0.000775	0.156261	NA	NA
chr20	16446150	16446375	225	0.1111	0.4444	5	20	0.000775	0.156261	NA	NA	KIF16B				1
chr22	12848029	12848202	173	0.4444	0.1111	20	5	0.000775	6.39957	NA	NA
chr22	12803224	12803397	173	0.1111	0.4444	5	20	0.000775	0.156261	NA	NA
chr17	22140584	22142434	1850	0.4444	0.1111	20	5	0.000775	6.39957	NA	NA
chr21	9446760	9450988	4228	0.1111	0.4444	5	20	0.000775	0.156261	NA	NA
chr2	226935142	226935394	252	0.0444	0.3333	2	15	0.000795	0.0929399	NA	NA
chr16	92386770	92386844	74	0.3333	0.0444	15	2	0.000795	10.7596	NA	NA
chr11	69088357	69088432	75	0.3333	0.0444	15	2	0.000795	10.7596	NA	NA	TPCN2				1
chr9	48885009	48885077	68	0.0444	0.3333	2	15	0.000795	0.0929399	NA	NA
chr20	40240274	40240587	313	0.3333	0.0444	15	2	0.000795	10.7596	0.05852	0.02386	RALGAPB				1
chr16	42496236	42496665	429	0.0444	0.3333	2	15	0.000795	0.0929399	NA	NA
chr1	39372709	39373167	458	0.3333	0.0444	15	2	0.000795	10.7596	NA	NA	BMP8A				1
chr9	47217201	47217881	680	0.3333	0.0444	15	2	0.000795	10.7596	NA	NA
chr20	49644890	49648115	3225	0.0444	0.3333	2	15	0.000795	0.0929399	NA	NA
chr13	10239282	10239423	141	0.0444	0.3333	2	15	0.000795	0.0929399	NA	NA
chr22	15082065	15083428	1363	0.3333	0.0444	15	2	0.000795	10.7596	NA	NA
chr2	3220716	3220807	91	0.0444	0.3333	2	15	0.000795	0.0929399	NA	NA	EIPR1				1
chr21	9420958	9422365	1407	0.0444	0.3333	2	15	0.000795	0.0929399	NA	NA
chr2	1284272	1284356	84	0.3333	0.0444	15	2	0.000795	10.7596	NA	NA	SNTG2				1
chr21	2996175	2997700	1525	0.3333	0.0444	15	2	0.000795	10.7596	NA	NA
chr1	393339	393447	108	0.3333	0.0444	15	2	0.000795	10.7596	NA	NA	KLHL17				1
chr14	291548	291740	192	0.0444	0.3333	2	15	0.000795	0.0929399	NA	NA
chr1	100376695	100377041	346	0.3333	0.0444	15	2	0.000795	10.7596	NA	NA
chr8	136653092	136653150	58	0.1778	0.5333	8	24	0.000815	0.189243	NA	NA	KHDRBS3				1
chr14	42556383	42556718	335	0.5333	0.1778	24	8	0.000815	5.2842	0.28831	0.11842
chr7	57057491	57059233	1742	0.1778	0.5333	8	24	0.000815	0.189243	NA	NA
chr8	44456477	44458174	1697	0.5333	0.1778	24	8	0.000815	5.2842	NA	NA
chr18	15844113	15845814	1701	0.5333	0.1778	24	8	0.000815	5.2842	NA	NA
chr13	804466	806267	1801	0.5333	0.1778	24	8	0.000815	5.2842	NA	NA
chr16	92386746	92386844	98	0.4444	0.8	20	36	0.000967	0.199964	NA	NA
chr15	70624181	70624308	127	0.5556	0.2	25	9	0.000967	5.0009	0	0
chr9	21929301	21929353	52	0.2	0.5556	9	25	0.000967	0.199964	NA	NA	MTAP				1
chr8	28197031	28197178	147	0.8	0.4444	36	20	0.000967	5.0009	NA	NA	SCARA5				1
chr6	172082402	172088193	5791	0.5556	0.2	25	9	0.000967	5.0009	0	0
chr22	15279207	15279549	342	0.2	0.5556	9	25	0.000967	0.199964	NA	NA
chr1	205236917	205237007	90	0.4667	0.1333	21	6	0.00106	5.6899	NA	NA
chr6	169578640	169578775	135	0.5333	0.8667	24	39	0.00106	0.17575	NA	NA
chr5	119051370	119051438	68	0.1333	0.4667	6	21	0.00106	0.17575	NA	NA
chr19	59836535	59836621	86	0.4667	0.1333	21	6	0.00106	5.6899	NA	NA
chr15	74938083	74938347	264	0.1333	0.4667	6	21	0.00106	0.17575	NA	NA	TSPAN3				1
chr22	49467360	49467492	132	0.1333	0.4667	6	21	0.00106	0.17575	0	0
chr1	75723352	75723831	479	0.4667	0.1333	21	6	0.00106	5.6899	0.00032	0.00093	MSH4				1
chr1	121636168	121638301	2133	0.1333	0.4667	6	21	0.00106	0.17575	NA	NA
chr12	15956664	15956756	92	0.8667	0.5333	39	24	0.00106	5.6899	NA	NA
chr19	29367251	29367931	680	0.4667	0.1333	21	6	0.00106	5.6899	NA	NA
chr12	34597923	34599620	1697	0.4667	0.1333	21	6	0.00106	5.6899	NA	NA
chr12	3562333	3562497	164	0.1333	0.4667	6	21	0.00106	0.17575	NA	NA	PRMT8				1
chr13	958377	958876	499	0.4667	0.1333	21	6	0.00106	5.6899	NA	NA
chr5	255992	256064	72	0.4667	0.1333	21	6	0.00106	5.6899	NA	NA
chr17	16393	25401	9008	0.4667	0.1333	21	6	0.00106	5.6899	NA	NA
chr10	735084	736575	1491	0.1333	0.4667	6	21	0.00106	0.17575	NA	NA
chr7	158974771	158974833	62	0.4	0.0889	18	4	0.0011	6.8324	NA	NA	PTPRN2				1
chr6	170479434	170479578	144	0.0889	0.4	4	18	0.0011	0.146362	NA	NA
chr2	91123447	91123545	98	0.0889	0.4	4	18	0.0011	0.146362	NA	NA
chr3	65582609	65582663	54	0.4	0.0889	18	4	0.0011	6.8324	0.00024	5e-05	MAGI1				1
chr9	105908447	105908623	176	0.0889	0.4	4	18	0.0011	0.146362	NA	NA
chr20	63172386	63172455	69	0.0889	0.4	4	18	0.0011	0.146362	NA	NA	CDH4				1
chr2	194916472	194917782	1310	0.4	0.0889	18	4	0.0011	6.8324	0.06115	0.06921
chr10	42447049	42447114	65	0.4	0.0889	18	4	0.0011	6.8324	NA	NA
chr4	28091678	28091731	53	0.4	0.0889	18	4	0.0011	6.8324	NA	NA
chr18	78781395	78781820	425	0.6	0.9111	27	41	0.0011	0.146362	8e-05	0
chr2	94355969	94356649	680	0.4	0.0889	18	4	0.0011	6.8324	NA	NA
chrY	21106706	21107832	1126	0.0889	0.4	4	18	0.0011	0.146362	NA	NA
chr15	1905947	1906001	54	0.4	0.0889	18	4	0.0011	6.8324	NA	NA
chr14	5352991	5356685	3694	0.4	0.0889	18	4	0.0011	6.8324	NA	NA
chr2	238033757	238033860	103	0.2222	0.5778	10	26	0.00111	0.208745	NA	NA	MLPH				1
chr9	96677083	96677159	76	0.7778	0.4222	35	19	0.00111	4.79053	NA	NA
chr9	79413849	79413901	52	0.5778	0.2222	26	10	0.00111	4.79053	NA	NA
chr1	188623530	188623846	316	0.4222	0.7778	19	35	0.00111	0.208745	NA	NA
chr13	72408272	72408661	389	0.7778	0.4222	35	19	0.00111	4.79053	0	0
chr1	36992140	36992264	124	0.5778	0.2222	26	10	0.00111	4.79053	NA	NA
chr5	49800214	49800464	250	0.5778	0.2222	26	10	0.00111	4.79053	NA	NA
chr21	22091301	22091364	63	0.2222	0.5778	10	26	0.00111	0.208745	NA	NA
chr19	24615448	24615619	171	0.7778	0.4222	35	19	0.00111	4.79053	NA	NA
chr5	50434725	50437112	2387	0.5778	0.2222	26	10	0.00111	4.79053	NA	NA
chr2	231865902	231865969	67	0.2222	0	10	0	0.00112	Inf	NA	NA
chr1	215076824	215076879	55	0.2222	0	10	0	0.00112	Inf	NA	NA	USH2A				1
chr1	205171182	205171234	52	0.2222	0	10	0	0.00112	Inf	NA	NA
chr2	186767329	186767425	96	0.2222	0	10	0	0.00112	Inf	NA	NA
chr2	139780807	139780875	68	0.2222	0	10	0	0.00112	Inf	NA	NA
chr12	129000769	129000830	61	0.2222	0	10	0	0.00112	Inf	NA	NA	GLT1D1				1
chrX	134066521	134066591	70	0.2222	0	10	0	0.00112	Inf	NA	NA
chr8	111147866	111147920	54	0	0.2222	0	10	0.00112	0	NA	NA
chr7	158884970	158885087	117	0.2222	0	10	0	0.00112	Inf	NA	NA	PTPRN2				1
chr6	116520813	116520877	64	0	0.2222	0	10	0.00112	0	NA	NA
chr5	173110896	173111055	159	0.2222	0	10	0	0.00112	Inf	NA	NA
chr10	134747965	134748056	91	0.2222	0	10	0	0.00112	Inf	NA	NA
chr12	112551334	112551400	66	0.2222	0	10	0	0.00112	Inf	0	2e-05	RPH3A				1
chrX	112794850	112794919	69	0	0.2222	0	10	0.00112	0	NA	NA
chr4	193003965	193004181	216	0.2222	0	10	0	0.00112	Inf	NA	NA
chr7	159805500	159805674	174	0.2222	0	10	0	0.00112	Inf	NA	NA
chr9	147420065	147420209	144	0.2222	0	10	0	0.00112	Inf	NA	NA
chr3	95357839	95357921	82	0.2222	0	10	0	0.00112	Inf	NA	NA
chr15	85102336	85102409	73	0.2222	0	10	0	0.00112	Inf	0.05104	0.03511
chr2	113978858	113978998	140	0.2222	0	10	0	0.00112	Inf	NA	NA
chr7	160390841	160391151	310	0.2222	0	10	0	0.00112	Inf	NA	NA
chr10	70407623	70407683	60	0	0.2222	0	10	0.00112	0	NA	NA
chr11	87919251	87919344	93	0.2222	0	10	0	0.00112	Inf	NA	NA
chrX	97290929	97291066	137	0.2222	0	10	0	0.00112	Inf	NA	NA
chr5	109845593	109845769	176	0	0.2222	0	10	0.00112	0	NA	NA	PJA2				1
chr5	150186226	150186571	345	0.2222	0	10	0	0.00112	Inf	NA	NA
chr11	82825463	82825581	118	0.2222	0	10	0	0.00112	Inf	0.13699	0.04962	PRCP				1
chr14	57959614	57959672	58	0.2222	0	10	0	0.00112	Inf	NA	NA
chr9	73670431	73670541	110	0	0.2222	0	10	0.00112	0	NA	NA
chr4	137912596	137912992	396	0.2222	0	10	0	0.00112	Inf	NA	NA
chr9	150076973	150077464	491	0.2222	0	10	0	0.00112	Inf	NA	NA	EHMT1				1
chr9	48265319	48265379	60	0.2222	0	10	0	0.00112	Inf	NA	NA
chr19	52692036	52692109	73	0.2222	0	10	0	0.00112	Inf	NA	NA	CPT1C				1
chr10	132630669	132631256	587	0.2222	0	10	0	0.00112	Inf	0.10766	0.15821
chr5	78578782	78579006	224	0.2222	0	10	0	0.00112	Inf	NA	NA	AP3B1				1
chr5	181605557	181606839	1282	0.2222	0	10	0	0.00112	Inf	NA	NA	BTNL9				1
chr6	81829760	81830032	272	0	0.2222	0	10	0.00112	0	NA	NA
chr17	45860747	45860833	86	0	0.2222	0	10	0.00112	0	NA	NA	NMT1				1
chr3	90805568	90805907	339	0	0.2222	0	10	0.00112	0	NA	NA
chr11	82561129	82561443	314	0	0.2222	0	10	0.00112	0	NA	NA
chr1	135472922	135473786	864	0.2222	0	10	0	0.00112	Inf	NA	NA
chr20	32232090	32232145	55	0.2222	0	10	0	0.00112	Inf	NA	NA
chr19	40552973	40553066	93	0	0.2222	0	10	0.00112	0	NA	NA	ZNF573				1
chr13	113320875	113321640	765	0	0.2222	0	10	0.00112	0	8e-05	0	RASA3				1
chr7	158920814	158922532	1718	0	0.2222	0	10	0.00112	0	0.01245	0.01769	PTPRN2				1
chr18	34011935	34012019	84	0	0.2222	0	10	0.00112	0	NA	NA
chr2	94598064	94598744	680	0.2222	0	10	0	0.00112	Inf	NA	NA
chr3	43539659	43539805	146	0.2222	0	10	0	0.00112	Inf	NA	NA	ANO10				1
chr9	49247164	49247359	195	0.2222	0	10	0	0.00112	Inf	NA	NA
chr22	25810202	25810256	54	0.2222	0	10	0	0.00112	Inf	NA	NA
chr11	60573614	60573917	303	0.2222	0	10	0	0.00112	Inf	NA	NA
chr13	26508433	26508492	59	0	0.2222	0	10	0.00112	0	NA	NA
chr16	94736538	94737297	759	0.2222	0	10	0	0.00112	Inf	NA	NA
chr16	94798940	94799705	765	0	0.2222	0	10	0.00112	0	0.00032	0.00012	PIEZO1				1
chr6	42352555	42352710	155	0.2222	0	10	0	0.00112	Inf	NA	NA
chr6	25072335	25072395	60	0.2222	0	10	0	0.00112	Inf	NA	NA
chr8	91808147	91808994	847	0.2222	0	10	0	0.00112	Inf	NA	NA	TMEM64				1
chr7	58528477	58528821	344	0.2222	0	10	0	0.00112	Inf	NA	NA
chr1	120843272	120844808	1536	0	0.2222	0	10	0.00112	0	NA	NA	NBPF26	1			2
chr8	64422914	64423378	464	0.2222	0	10	0	0.00112	Inf	0.11387	0.09181
chr2	92726208	92727230	1022	0	0.2222	0	10	0.00112	0	NA	NA
chr17	58005854	58006262	408	0.2222	0	10	0	0.00112	Inf	0.09432	0.07937
chr7	58527840	58528264	424	0.2222	0	10	0	0.00112	Inf	NA	NA
chr1	121781650	121783516	1866	0.2222	0	10	0	0.00112	Inf	NA	NA
chr20	22139831	22139895	64	0	0.2222	0	10	0.00112	0	NA	NA
chr13	22263960	22264030	70	0.2222	0	10	0	0.00112	Inf	NA	NA
chr5	36605587	36605778	191	0.2222	0	10	0	0.00112	Inf	0.07053	0.05324
chr18	80228335	80229269	934	0.2222	0	10	0	0.00112	Inf	0.00048	0.00071
chr6	51044903	51045283	380	0	0.2222	0	10	0.00112	0	NA	NA
chr5	48292113	48292455	342	0	0.2222	0	10	0.00112	0	NA	NA
chr17	74263689	74264520	831	0.2222	0	10	0	0.00112	Inf	0.13615	0.02856	SDK2				1
chr2	92527738	92529097	1359	0.2222	0	10	0	0.00112	Inf	NA	NA
chr16	88339455	88340781	1326	0.2222	0	10	0	0.00112	Inf	0.24064	0.08446
chr6	66906100	66906892	792	0.7778	1	35	45	0.00112	0	8e-05	7e-05
chr2	91401414	91402929	1515	1	0.7778	45	35	0.00112	Inf	NA	NA
chr4	155192105	155196660	4555	0	0.2222	0	10	0.00112	0	0.0937	0.06553
chr11	61999344	62000115	771	0.2222	0	10	0	0.00112	Inf	8e-05	0.0001
chr14	39611197	39611516	319	0.2222	0	10	0	0.00112	Inf	NA	NA
chr9	47535400	47535912	512	0.2222	0	10	0	0.00112	Inf	NA	NA
chr19	36921540	36921864	324	0.7778	1	35	45	0.00112	0	NA	NA	GPI				1
chr9	75384349	75385712	1363	0	0.2222	0	10	0.00112	0	NA	NA
chr9	46068940	46069452	512	0	0.2222	0	10	0.00112	0	NA	NA
chr8	18087232	18087313	81	0	0.2222	0	10	0.00112	0	NA	NA
chr19	25494100	25494271	171	0.2222	0	10	0	0.00112	Inf	NA	NA
chr4	54874525	54875321	796	0.2222	0	10	0	0.00112	Inf	NA	NA
chr17	27865799	27866023	224	0	0.2222	0	10	0.00112	0	NA	NA
chr21	44551905	44552614	709	0	0.2222	0	10	0.00112	0	NA	NA	SPATC1L				1
chr4	50585809	50586725	916	0	0.2222	0	10	0.00112	0	NA	NA
chr11	90756165	90759165	3000	0.2222	0	10	0	0.00112	Inf	0.03805	0.0012
chr12	98534937	98538539	3602	0	0.2222	0	10	0.00112	0	0.04828	0.07232
chr19	29335681	29336021	340	0.2222	0	10	0	0.00112	Inf	NA	NA
chr19	29249225	29249565	340	0.2222	0	10	0	0.00112	Inf	NA	NA
chr22	18812855	18812999	144	0	0.2222	0	10	0.00112	0	NA	NA	TUBA8			1
chr19	28636458	28636798	340	0.2222	0	10	0	0.00112	Inf	NA	NA
chr19	28568844	28569183	339	0.2222	0	10	0	0.00112	Inf	NA	NA
chr16	41879070	41879802	732	0.2222	0	10	0	0.00112	Inf	NA	NA
chr19	27842282	27842622	340	0.2222	0	10	0	0.00112	Inf	NA	NA
chr2	90369180	90372770	3590	0	0.2222	0	10	0.00112	0	NA	NA
chr2	94535643	94539721	4078	0	0.2222	0	10	0.00112	0	NA	NA
chrX	60290674	60292390	1716	0	0.2222	0	10	0.00112	0	NA	NA
chrX	60262726	60264442	1716	0	0.2222	0	10	0.00112	0	NA	NA
chr16	37414806	37415484	678	0	0.2222	0	10	0.00112	0	NA	NA
chr3	13956864	13956960	96	0	0.2222	0	10	0.00112	0	NA	NA
chr9	70274302	70276749	2447	0.2222	0	10	0	0.00112	Inf	NA	NA
chr9	47382360	47383552	1192	0	0.2222	0	10	0.00112	0	NA	NA
chr9	47036199	47037391	1192	0.2222	0	10	0	0.00112	Inf	NA	NA
chr7	57048970	57050760	1790	0.2222	0	10	0	0.00112	Inf	NA	NA
chr10	41883589	41884608	1019	0.2222	0	10	0	0.00112	Inf	NA	NA
chrX	58859512	58861569	2057	0	0.2222	0	10	0.00112	0	NA	NA
chrX	58770814	58772871	2057	0	0.2222	0	10	0.00112	0	NA	NA
chrX	58712626	58714682	2056	0	0.2222	0	10	0.00112	0	NA	NA
chrX	58713790	58715847	2057	0.2222	0	10	0	0.00112	Inf	NA	NA
chrX	58334304	58336360	2056	0	0.2222	0	10	0.00112	0	NA	NA
chrX	58337926	58339983	2057	0.2222	0	10	0	0.00112	Inf	NA	NA
chr12	36982177	36983191	1014	0	0.2222	0	10	0.00112	0	NA	NA
chr22	9531019	9531088	69	0.7778	1	35	45	0.00112	0	NA	NA
chr12	36483817	36484836	1019	0	0.2222	0	10	0.00112	0	NA	NA
chr18	20476489	20476825	336	0.2222	0	10	0	0.00112	Inf	NA	NA
chr4	50471065	50473182	2117	0.2222	0	10	0	0.00112	Inf	NA	NA
chr18	20234087	20234429	342	0	0.2222	0	10	0.00112	0	NA	NA
chr5	50912912	50915130	2218	0	0.2222	0	10	0.00112	0	NA	NA
chr18	19623118	19623460	342	0	0.2222	0	10	0.00112	0	NA	NA
chrX	49282511	49284897	2386	0.2222	0	10	0	0.00112	Inf	0.04792	0.00157	CLCN5				1
chr19	29659694	29660713	1019	0.2222	0	10	0	0.00112	Inf	NA	NA
chr9	44969606	44971986	2380	0	0.2222	0	10	0.00112	0	NA	NA
chr19	28634630	28635651	1021	0.2222	0	10	0	0.00112	Inf	NA	NA
chr18	15998431	15998773	342	0.2222	0	10	0	0.00112	Inf	NA	NA
chr21	11290971	11291143	172	0.2222	0	10	0	0.00112	Inf	NA	NA
chr19	27455567	27456587	1020	0.2222	0	10	0	0.00112	Inf	NA	NA
chr19	27344392	27345411	1019	0.2222	0	10	0	0.00112	Inf	NA	NA
chr19	27349266	27350286	1020	0.2222	0	10	0	0.00112	Inf	NA	NA
chr22	15180432	15180774	342	0.2222	0	10	0	0.00112	Inf	NA	NA
chr19	25966963	25967982	1019	0.2222	0	10	0	0.00112	Inf	NA	NA
chr18	19522017	19522691	674	0.2222	0	10	0	0.00112	Inf	NA	NA
chr12	36488965	36491343	2378	0	0.2222	0	10	0.00112	0	NA	NA
chr7	5565213	5565273	60	0	0.2222	0	10	0.00112	0	NA	NA	FBXL18				1
chr15	17649497	17650177	680	0.2222	0	10	0	0.00112	Inf	NA	NA
chr12	36395235	36398290	3055	0	0.2222	0	10	0.00112	0	NA	NA
chr15	16691664	16692344	680	0.2222	0	10	0	0.00112	Inf	NA	NA
chr15	16688679	16689359	680	0.2222	0	10	0	0.00112	Inf	NA	NA
chr19	28537759	28539799	2040	0	0.2222	0	10	0.00112	0	NA	NA
chr21	7109312	7109447	135	0.2222	0	10	0	0.00112	Inf	NA	NA
chr19	27212759	27214799	2040	0.2222	0	10	0	0.00112	Inf	NA	NA
chr22	16003364	16004082	718	0.2222	0	10	0	0.00112	Inf	NA	NA
chr19	25939205	25941244	2039	0.2222	0	10	0	0.00112	Inf	NA	NA
chr18	20955891	20957253	1362	0.2222	0	10	0	0.00112	Inf	NA	NA
chr18	19836216	19837575	1359	0.2222	0	10	0	0.00112	Inf	NA	NA
chr17	26778012	26780559	2547	0	0.2222	0	10	0.00112	0	NA	NA
chr22	15620021	15621042	1021	0.2222	0	10	0	0.00112	Inf	NA	NA
chr15	14757422	14758396	974	0.2222	0	10	0	0.00112	Inf	NA	NA
chr4	49087320	49098227	10907	0.2222	0	10	0	0.00112	Inf	NA	NA
chr19	25989962	25993022	3060	0.2222	0	10	0	0.00112	Inf	NA	NA
chr12	3353224	3353276	52	0	0.2222	0	10	0.00112	0	8e-05	0.00019
chr17	22023894	22026263	2369	0.2222	0	10	0	0.00112	Inf	NA	NA
chr17	24560884	24563938	3054	0.2222	0	10	0	0.00112	Inf	NA	NA
chr19	29249631	29254377	4746	0.2222	0	10	0	0.00112	Inf	NA	NA
chr18	19988592	19991309	2717	0	0.2222	0	10	0.00112	0	NA	NA
chr22	13011111	13012475	1364	0.2222	0	10	0	0.00112	Inf	NA	NA
chr22	13001170	13002534	1364	0.2222	0	10	0	0.00112	Inf	NA	NA
chr13	9170145	9170830	685	0.2222	0	10	0	0.00112	Inf	NA	NA
chr22	12863944	12865307	1363	0.2222	0	10	0	0.00112	Inf	NA	NA
chrX	2650534	2650592	58	0.2222	0	10	0	0.00112	Inf	NA	NA
chr1	2855716	2855786	70	0.2222	0	10	0	0.00112	Inf	NA	NA	PRDM16				1
chr18	15818281	15820494	2213	0.2222	0	10	0	0.00112	Inf	NA	NA
chr22	15021432	15023476	2044	0.2222	0	10	0	0.00112	Inf	NA	NA
chr21	11276787	11277977	1190	0	0.2222	0	10	0.00112	0	NA	NA
chr11	5757078	5757413	335	0	0.2222	0	10	0.00112	0	0.05689	0.042	TRIM22				1	TRIM5				1
chr15	12308529	12310384	1855	0.2222	0	10	0	0.00112	Inf	NA	NA
chr22	10919241	10920751	1510	0.2222	0	10	0	0.00112	Inf	NA	NA
chr18	15579107	15582181	3074	0.2222	0	10	0	0.00112	Inf	NA	NA
chr15	15681052	15684178	3126	0.2222	0	10	0	0.00112	Inf	NA	NA
chr19	1959846	1959897	51	0.2222	0	10	0	0.00112	Inf	NA	NA	BTBD2				1
chr22	12879558	12882286	2728	0	0.2222	0	10	0.00112	0	NA	NA
chr2	1542927	1542981	54	0	0.2222	0	10	0.00112	0	NA	NA	TPO				1
chr1	2275574	2275693	119	0.2222	0	10	0	0.00112	Inf	NA	NA
chr15	8090134	8091923	1789	0.2222	0	10	0	0.00112	Inf	NA	NA
chr14	6977730	6979148	1418	0.2222	0	10	0	0.00112	Inf	NA	NA
chr22	13002558	13008008	5450	0.2222	0	10	0	0.00112	Inf	NA	NA
chr8	1733017	1733120	103	0.2222	0	10	0	0.00112	Inf	NA	NA	ARHGEF10				1
chr6	1570558	1570682	124	0.2222	0	10	0	0.00112	Inf	NA	NA	GMDS				1
chr14	3897122	3897921	799	0.2222	0	10	0	0.00112	Inf	NA	NA
chr21	8190914	8194828	3914	0	0.2222	0	10	0.00112	0	NA	NA
chr11	1509527	1509701	174	0	0.2222	0	10	0.00112	0	NA	NA	BRSK2				1
chr21	625205	625274	69	0.2222	0	10	0	0.00112	Inf	NA	NA
chr12	573383	573467	84	0.2222	0	10	0	0.00112	Inf	NA	NA	NINJ2				1
chr15	6356394	6366984	10590	0.2222	0	10	0	0.00112	Inf	NA	NA
chr13	1002775	1003195	420	0.2222	0	10	0	0.00112	Inf	NA	NA
chr14	3623609	3630855	7246	0	0.2222	0	10	0.00112	0	NA	NA
chr6	374034	374119	85	0.2222	0	10	0	0.00112	Inf	NA	NA	EXOC2				1
chr3	1318204	1319337	1133	0.2222	0	10	0	0.00112	Inf	0.02097	0.00053	CNTN6				1
chr13	1186416	1187334	918	0	0.2222	0	10	0.00112	0	NA	NA
chrX	578081	578325	244	0.2222	0	10	0	0.00112	Inf	NA	NA
chr10	257537	257596	59	0.2222	0	10	0	0.00112	Inf	NA	NA
chr14	267650	267714	64	0	0.2222	0	10	0.00112	0	NA	NA
chr13	1129039	1130497	1458	0	0.2222	0	10	0.00112	0	NA	NA
chr3	521870	522195	325	0.2222	0	10	0	0.00112	Inf	0.04043	0.01556
chr10	421828	422051	223	0	0.2222	0	10	0.00112	0	0.17699	0.19493	DIP2C				1
chr13	693686	694311	625	0	0.2222	0	10	0.00112	0	NA	NA
chr13	802714	803762	1048	0.2222	0	10	0	0.00112	Inf	NA	NA
chr13	318978	319151	173	0.2222	0	10	0	0.00112	Inf	NA	NA
chr21	808236	810141	1905	0.2222	0	10	0	0.00112	Inf	NA	NA
chr19	348540	348983	443	0.2222	0	10	0	0.00112	Inf	NA	NA
chr15	1331170	1342300	11130	0.2222	0	10	0	0.00112	Inf	NA	NA
chr5	559335	562046	2711	0.2222	0	10	0	0.00112	Inf	0.0308	0.00713
chrY	105150	105584	434	0	0.2222	0	10	0.00112	0	NA	NA
chrY	26802	27165	363	0	0.2222	0	10	0.00112	0	NA	NA
chr11	88680	93681	5001	0	0.2222	0	10	0.00112	0	NA	NA
chr10	42208540	42216413	7873	0	0.2222	0	10	0.00112	0	NA	NA
chr18	67489899	67498134	8235	0.2222	0	10	0	0.00112	Inf	0.0711	0.01833
chr12	124381434	124381487	53	0.7556	0.4	34	18	0.00123	4.63748	NA	NA	NCOR2				1
chr12	132447950	132448112	162	0.7556	0.4	34	18	0.00123	4.63748	NA	NA
chr15	98460836	98460940	104	0.4	0.7556	18	34	0.00123	0.215634	NA	NA
chr22	43686592	43686660	68	0.7556	0.4	34	18	0.00123	4.63748	0.00341	0.00401	SCUBE1				1
chr4	68271431	68271659	228	0.6	0.2444	27	11	0.00123	4.63748	NA	NA
chr14	30394592	30394844	252	0.6	0.2444	27	11	0.00123	4.63748	NA	NA
chr4	185146166	185146238	72	0.6222	0.2667	28	12	0.00132	4.52821	NA	NA
chr1	144526037	144526135	98	0.6222	0.2667	28	12	0.00132	4.52821	NA	NA
chr7	117877950	117878034	84	0.2667	0.6222	12	28	0.00132	0.220838	NA	NA
chr1	121719669	121721534	1865	0.2667	0.6222	12	28	0.00132	0.220838	NA	NA
chr8	127307518	127309882	2364	0.7333	0.3778	33	17	0.00132	4.52821	0.40621	0.30932
chr20	49580258	49582408	2150	0.6222	0.2667	28	12	0.00132	4.52821	NA	NA
chr14	8306793	8306863	70	0.2667	0.6222	12	28	0.00132	0.220838	NA	NA
chr22	14915224	14916584	1360	0.2667	0.6222	12	28	0.00132	0.220838	NA	NA
chr22	2116730	2118636	1906	0.7333	0.3778	33	17	0.00132	4.52821	NA	NA
chr13	591140	591308	168	0.6222	0.2667	28	12	0.00132	4.52821	NA	NA
chr7	1035542	1036231	689	0.2667	0.6222	12	28	0.00132	0.220838	NA	NA	ADAP1				1	COX19				1
chr6	171842192	171842299	107	0.5111	0.8444	23	38	0.00136	0.19264	NA	NA
chr11	76779368	76779420	52	0.4889	0.1556	22	7	0.00136	5.19102	NA	NA
chr7	85906900	85906976	76	0.1556	0.4889	7	22	0.00136	0.19264	NA	NA
chr6	104855088	104855216	128	0.1556	0.4889	7	22	0.00136	0.19264	0.20234	0.26045
chr4	108141648	108141836	188	0.8444	0.5111	38	23	0.00136	5.19102	0.40106	0.27298
chr12	131698153	131698473	320	0.4889	0.1556	22	7	0.00136	5.19102	NA	NA
chr13	112284110	112284398	288	0.4889	0.1556	22	7	0.00136	5.19102	NA	NA	MCF2L				1
chr14	100285769	100286079	310	0.8444	0.5111	38	23	0.00136	5.19102	NA	NA
chr9	85275473	85275713	240	0.1556	0.4889	7	22	0.00136	0.19264	NA	NA
chr9	73553882	73554197	315	0.1556	0.4889	7	22	0.00136	0.19264	NA	NA
chr2	15643399	15643497	98	0.5111	0.8444	23	38	0.00136	0.19264	NA	NA	DDX1				1
chr5	550856	551309	453	0.1556	0.4889	7	22	0.00136	0.19264	NA	NA
chr5	551513	552022	509	0.1556	0.4889	7	22	0.00136	0.19264	NA	NA
chr8	139175583	139175697	114	0.7111	0.3556	32	16	0.00139	4.46043	NA	NA
chr6	135664058	135664176	118	0.6444	0.2889	29	13	0.00139	4.46043	NA	NA
chr17	84023513	84023642	129	0.6444	0.2889	29	13	0.00139	4.46043	NA	NA	B3GNTL1				1
chr19	57262211	57262375	164	0.6444	0.2889	29	13	0.00139	4.46043	NA	NA	MBOAT7				1
chr16	18438576	18438639	63	0.2889	0.6444	13	29	0.00139	0.224194	NA	NA	NOMO2				1
chr19	61635073	61635852	779	0.7111	0.3556	32	16	0.00139	4.46043	NA	NA
chr7	59700263	59701462	1199	0.6444	0.2889	29	13	0.00139	4.46043	NA	NA
chr6	113086307	113091539	5232	0.6444	0.2889	29	13	0.00139	4.46043	0.06593	0.03928
chr22	15367936	15368958	1022	0.6444	0.2889	29	13	0.00139	4.46043	NA	NA
chr5	1084660	1087099	2439	0.3556	0.7111	16	32	0.00139	0.224194	0.27632	0.48241
chrX	146811729	146811806	77	0.6889	0.3333	31	15	0.00142	4.42947	0.00011	2e-05	AFF2				1
chr10	93854190	93854247	57	0.3333	0.6889	15	31	0.00142	0.225761	NA	NA	EXOC6				1
chr15	92112309	92112387	78	0.6889	0.3333	31	15	0.00142	4.42947	NA	NA	MCTP2				1
chr7	94159791	94159886	95	0.6889	0.3333	31	15	0.00142	4.42947	0.20735	0.13416
chr18	80103743	80103854	111	0.3111	0.6667	14	30	0.00142	0.225761	0.00016	2e-05
chr6	113065732	113066048	316	0.6889	0.3333	31	15	0.00142	4.42947	NA	NA
chr4	89204603	89204808	205	0.3111	0.6667	14	30	0.00142	0.225761	NA	NA	ARHGAP24				1
chr8	42617339	42617407	68	0.3111	0.6667	14	30	0.00142	0.225761	NA	NA	POLB				1
chr7	77553299	77553641	342	0.6667	0.3111	30	14	0.00142	4.42947	0.28471	0.32284	SRRM3				1
chr5	71696134	71696944	810	0.6667	0.3111	30	14	0.00142	4.42947	NA	NA
chr10	5581361	5581492	131	0.6667	0.3111	30	14	0.00142	4.42947	NA	NA
chr18	16330055	16331415	1360	0.3111	0.6667	14	30	0.00142	0.225761	NA	NA
chr8	143361869	143361973	104	0.6444	0.9333	29	42	0.00144	0.129509	NA	NA	TSNARE1				1
chr8	146095524	146095769	245	0.6444	0.9333	29	42	0.00144	0.129509	NA	NA
chr14	76887416	76887498	82	0.0667	0.3556	3	16	0.00144	0.129509	NA	NA
chr7	109295106	109295275	169	0.0667	0.3556	3	16	0.00144	0.129509	NA	NA	LAMB1				1
chr7	160141823	160142201	378	0.0667	0.3556	3	16	0.00144	0.129509	0.01291	0.00758	DYNC2I1				1
chr17	80215065	80215174	109	0.3556	0.0667	16	3	0.00144	7.7215	0.0004	0.00027	RBFOX3				1
chr6	135684452	135684769	317	0.9333	0.6444	42	29	0.00144	7.7215	0.6708	0.60012
chr9	149560646	149561033	387	0.0667	0.3556	3	16	0.00144	0.129509	NA	NA	EXD3				1
chr20	44240942	44241008	66	0.0667	0.3556	3	16	0.00144	0.129509	NA	NA	PTPRT				1
chr2	92529768	92530106	338	0.0667	0.3556	3	16	0.00144	0.129509	NA	NA
chr20	31017979	31018052	73	0.9333	0.6444	42	29	0.00144	7.7215	NA	NA
chr10	42349280	42350371	1091	0.0667	0.3556	3	16	0.00144	0.129509	NA	NA
chr8	45723486	45725354	1868	0.3556	0.0667	16	3	0.00144	7.7215	NA	NA
chr20	32852333	32853317	984	0.3556	0.0667	16	3	0.00144	7.7215	NA	NA
chr10	42918345	42920161	1816	0.3556	0.0667	16	3	0.00144	7.7215	NA	NA
chrY	49235417	49237837	2420	0.0667	0.3556	3	16	0.00144	0.129509	NA	NA
chr10	38589660	38591428	1768	0.3556	0.0667	16	3	0.00144	7.7215	NA	NA
chr19	27590727	27591747	1020	0.3556	0.0667	16	3	0.00144	7.7215	NA	NA
chr19	29272903	29274263	1360	0.3556	0.0667	16	3	0.00144	7.7215	NA	NA
chr15	19549894	19550715	821	0.0667	0.3556	3	16	0.00144	0.129509	NA	NA
chr18	17470101	17470776	675	0.0667	0.3556	3	16	0.00144	0.129509	NA	NA
chr20	30429214	30431620	2406	0.9333	0.6444	42	29	0.00144	7.7215	NA	NA
chr13	17483135	17484325	1190	0.0667	0.3556	3	16	0.00144	0.129509	NA	NA
chr1	6643845	6644090	245	0.0667	0.3556	3	16	0.00144	0.129509	NA	NA	CAMTA1				1
chr15	6185398	6186243	845	0.3556	0.0667	16	3	0.00144	7.7215	NA	NA
chr17	6986087	6987322	1235	0.3556	0.0667	16	3	0.00144	7.7215	0.00665	0.00531
chr1	2236498	2236939	441	0.0667	0.3556	3	16	0.00144	0.129509	NA	NA
chr14	994685	997927	3242	0.0667	0.3556	3	16	0.00144	0.129509	NA	NA
chr2	230602178	230602297	119	0.1111	0.4222	5	19	0.0016	0.171049	NA	NA
chr11	108593975	108594038	63	0.1111	0.4222	5	19	0.0016	0.171049	NA	NA	EXPH5				1
chr1	228225020	228225442	422	0.5778	0.8889	26	40	0.0016	0.171049	0.00032	2e-05
chr9	84639361	84639425	64	0.5778	0.8889	26	40	0.0016	0.171049	NA	NA
chr3	197639514	197639870	356	0.1111	0.4222	5	19	0.0016	0.171049	NA	NA
chr4	122397999	122398324	325	0.4222	0.1111	19	5	0.0016	5.84628	0.13626	0.15417
chr1	129675550	129675982	432	0.1111	0.4222	5	19	0.0016	0.171049	NA	NA
chr7	109482384	109482778	394	0.4222	0.1111	19	5	0.0016	5.84628	NA	NA	NRCAM				1
chr5	49709693	49709798	105	0.4222	0.1111	19	5	0.0016	5.84628	NA	NA
chr5	181947656	181949195	1539	0.4222	0.1111	19	5	0.0016	5.84628	NA	NA
chr5	52873562	52873788	226	0.4222	0.1111	19	5	0.0016	5.84628	NA	NA
chr22	18087215	18087289	74	0.1111	0.4222	5	19	0.0016	0.171049	NA	NA	CECR2				1
chr9	75728326	75730199	1873	0.4222	0.1111	19	5	0.0016	5.84628	NA	NA
chr19	29223022	29223361	339	0.4222	0.1111	19	5	0.0016	5.84628	NA	NA
chr19	28949011	28949351	340	0.4222	0.1111	19	5	0.0016	5.84628	NA	NA
chr21	14753496	14753592	96	0.4222	0.1111	19	5	0.0016	5.84628	NA	NA
chr17	21996880	21997165	285	0.4222	0.1111	19	5	0.0016	5.84628	NA	NA
chr19	25482466	25483148	682	0.4222	0.1111	19	5	0.0016	5.84628	NA	NA
chr19	28683485	28684505	1020	0.4222	0.1111	19	5	0.0016	5.84628	NA	NA
chr2	2947094	2947188	94	0.4222	0.1111	19	5	0.0016	5.84628	NA	NA
chr11	762769	763071	302	0.4222	0.1111	19	5	0.0016	5.84628	NA	NA	EPS8L2				1
chr14	1127291	1129413	2122	0.4222	0.1111	19	5	0.0016	5.84628	NA	NA
chr13	586144	587946	1802	0.4222	0.1111	19	5	0.0016	5.84628	NA	NA
chr3	170114696	170114771	75	0.0222	0.2667	1	12	0.00166	0.0624254	NA	NA	ZBBX				1
chr5	166777413	166777492	79	0.0222	0.2667	1	12	0.00166	0.0624254	0.04384	0.07615
chr5	127767075	127767152	77	0.0222	0.2667	1	12	0.00166	0.0624254	NA	NA
chr5	119053941	119054012	71	0.0222	0.2667	1	12	0.00166	0.0624254	NA	NA
chr1	105116978	105117034	56	0.0222	0.2667	1	12	0.00166	0.0624254	NA	NA
chr6	134854206	134854333	127	0.2667	0.0222	12	1	0.00166	16.0191	NA	NA
chr8	77775421	77775485	64	0.0222	0.2667	1	12	0.00166	0.0624254	NA	NA
chr3	55444976	55445032	56	0.2667	0.0222	12	1	0.00166	16.0191	NA	NA
chr18	78798780	78798894	114	0.0222	0.2667	1	12	0.00166	0.0624254	NA	NA
chr7	64730892	64730970	78	0.2667	0.0222	12	1	0.00166	16.0191	NA	NA
chr12	124442817	124443190	373	0.0222	0.2667	1	12	0.00166	0.0624254	NA	NA	NCOR2				1
chr17	78378653	78378828	175	0.0222	0.2667	1	12	0.00166	0.0624254	NA	NA	SEPTIN9				1
chr7	99097077	99097410	333	0.0222	0.2667	1	12	0.00166	0.0624254	0.06626	0.09719	ASNS				1
chr8	103555150	103555567	417	0.2667	0.0222	12	1	0.00166	16.0191	0.12568	0.02697
chr6	68589027	68589234	207	0.0222	0.2667	1	12	0.00166	0.0624254	0	7e-05
chr12	130683577	130684381	804	0.0222	0.2667	1	12	0.00166	0.0624254	0.00604	0.0078	RIMBP2				1
chr7	59628731	59628902	171	0.2667	0.0222	12	1	0.00166	16.0191	NA	NA
chr19	58568272	58568440	168	0.0222	0.2667	1	12	0.00166	0.0624254	0	0
chr8	77773823	77774154	331	0.0222	0.2667	1	12	0.00166	0.0624254	NA	NA
chr9	72648392	72648736	344	0.2667	0.0222	12	1	0.00166	16.0191	NA	NA
chr16	47662643	47662813	170	0.2667	0.0222	12	1	0.00166	16.0191	NA	NA
chr15	45236409	45236583	174	0.9778	0.7333	44	33	0.00166	16.0191	0.54193	0.54272	SEMA6D				1
chrX	58028559	58028898	339	0.0222	0.2667	1	12	0.00166	0.0624254	NA	NA
chr2	94573716	94574734	1018	0.0222	0.2667	1	12	0.00166	0.0624254	NA	NA
chr19	20961035	20961095	60	0.2667	0.0222	12	1	0.00166	16.0191	NA	NA
chr9	72351312	72352059	747	0.2667	0.0222	12	1	0.00166	16.0191	NA	NA
chr5	47698859	47699199	340	0.0222	0.2667	1	12	0.00166	0.0624254	NA	NA
chr19	16870617	16870672	55	0.2667	0.0222	12	1	0.00166	16.0191	NA	NA	NWD1				1
chr10	40336716	40337054	338	0.0222	0.2667	1	12	0.00166	0.0624254	NA	NA
chr6	34992381	34992638	257	0.2667	0.0222	12	1	0.00166	16.0191	NA	NA
chr9	65084296	65085206	910	0.2667	0.0222	12	1	0.00166	16.0191	NA	NA
chr9	46317478	46317990	512	0.0222	0.2667	1	12	0.00166	0.0624254	NA	NA
chr16	35898488	35898828	340	0.0222	0.2667	1	12	0.00166	0.0624254	NA	NA
chr9	47305264	47305943	679	0.2667	0.0222	12	1	0.00166	16.0191	NA	NA
chr19	21057288	21057426	138	0.2667	0.0222	12	1	0.00166	16.0191	NA	NA
chr2	92322454	92325519	3065	0.0222	0.2667	1	12	0.00166	0.0624254	NA	NA
chr10	11694100	11694157	57	0.2667	0.0222	12	1	0.00166	16.0191	NA	NA
chr1	120455320	120461669	6349	0.2667	0.0222	12	1	0.00166	16.0191	NA	NA
chr19	27836619	27836958	339	0.2667	0.0222	12	1	0.00166	16.0191	NA	NA
chr4	50480004	50481656	1652	0.2667	0.0222	12	1	0.00166	16.0191	NA	NA
chr4	21327921	21328258	337	0.2667	0.0222	12	1	0.00166	16.0191	8e-05	2e-05	KCNIP4				1
chr12	36290482	36291500	1018	0.0222	0.2667	1	12	0.00166	0.0624254	NA	NA
chr3	19135569	19135858	289	0.2667	0.0222	12	1	0.00166	16.0191	0.03344	0.00175
chr12	34613565	34614586	1021	0.2667	0.0222	12	1	0.00166	16.0191	NA	NA
chr12	34606432	34607453	1021	0.9778	0.7333	44	33	0.00166	16.0191	NA	NA
chr17	32725430	32726349	919	0.0222	0.2667	1	12	0.00166	0.0624254	0.08044	0.11028
chr2	91443338	91450636	7298	0.9778	0.7333	44	33	0.00166	16.0191	NA	NA
chr9	44807473	44810350	2877	0.2667	0.0222	12	1	0.00166	16.0191	NA	NA
chr9	46664223	46667628	3405	0.0222	0.2667	1	12	0.00166	0.0624254	NA	NA
chr17	5676162	5676218	56	0.0222	0.2667	1	12	0.00166	0.0624254	NA	NA
chr17	22084381	22085471	1090	0.2667	0.0222	12	1	0.00166	16.0191	NA	NA
chr16	35856878	35861287	4409	0.0222	0.2667	1	12	0.00166	0.0624254	NA	NA
chr18	15982776	15984124	1348	0.0222	0.2667	1	12	0.00166	0.0624254	NA	NA
chr15	9271345	9271975	630	0.2667	0.0222	12	1	0.00166	16.0191	NA	NA
chr18	19812722	19818151	5429	0.0222	0.2667	1	12	0.00166	0.0624254	NA	NA
chr2	1535215	1535268	53	0.0222	0.2667	1	12	0.00166	0.0624254	NA	NA	TPO				1
chr14	7465130	7466499	1369	0.2667	0.0222	12	1	0.00166	16.0191	NA	NA
chr2	1543465	1543551	86	0.0222	0.2667	1	12	0.00166	0.0624254	NA	NA	TPO				1
chr12	1011832	1011913	81	0.2667	0.0222	12	1	0.00166	16.0191	8e-05	0	ERC1				1
chr22	2763951	2764998	1047	0.2667	0.0222	12	1	0.00166	16.0191	NA	NA
chr5	949503	950563	1060	0.2667	0.0222	12	1	0.00166	16.0191	NA	NA
chr11	1016213	1020451	4238	0.9778	0.7333	44	33	0.00166	16.0191	NA	NA	AP2A2				1
chr2	240225451	240225571	120	0.1778	0.5111	8	23	0.00167	0.206856	0	4e-05
chr5	85372023	85372077	54	0.5111	0.1778	23	8	0.00167	4.83428	NA	NA
chr2	76080223	76080277	54	0.5111	0.1778	23	8	0.00167	4.83428	NA	NA
chr2	132201168	132201436	268	0.8222	0.4889	37	22	0.00167	4.83428	NA	NA
chr8	119096974	119097296	322	0.8222	0.4889	37	22	0.00167	4.83428	NA	NA	EXT1				1
chr2	76080816	76080948	132	0.5111	0.1778	23	8	0.00167	4.83428	NA	NA
chr4	91711679	91711971	292	0.5111	0.1778	23	8	0.00167	4.83428	NA	NA	HERC6				1
chr2	132199405	132200119	714	0.8222	0.4889	37	22	0.00167	4.83428	NA	NA
chr4	64399876	64400204	328	0.8222	0.4889	37	22	0.00167	4.83428	NA	NA
chr1	30500455	30500940	485	0.4889	0.8222	22	37	0.00167	0.206856	0.00159	0.00141
chr1	17163742	17165235	1493	0.4889	0.8222	22	37	0.00167	0.206856	0.39409	0.374	PADI4				1
chr1	2222548	2224111	1563	0.4889	0.8222	22	37	0.00167	0.206856	NA	NA
chr1	248124805	248125082	277	0.0444	0.3111	2	14	0.00169	0.102888	NA	NA
chr7	111378492	111378553	61	0.3111	0.0444	14	2	0.00169	9.71934	NA	NA
chr1	88251199	88251250	51	0.0444	0.3111	2	14	0.00169	0.102888	NA	NA
chr1	188623518	188623835	317	0.3111	0.0444	14	2	0.00169	9.71934	NA	NA
chr8	82801331	82801406	75	0.3111	0.0444	14	2	0.00169	9.71934	NA	NA
chr7	75416728	75416800	72	0.0444	0.3111	2	14	0.00169	0.102888	NA	NA	LAT2				1
chr2	219334479	219335259	780	0.3111	0.0444	14	2	0.00169	9.71934	NA	NA
chr7	100612371	100612546	175	0.3111	0.0444	14	2	0.00169	9.71934	NA	NA
chr2	135233261	135233631	370	0.3111	0.0444	14	2	0.00169	9.71934	0.1346	0.02561
chr5	49651230	49651295	65	0.3111	0.0444	14	2	0.00169	9.71934	NA	NA
chr19	59437010	59437110	100	0.3111	0.0444	14	2	0.00169	9.71934	NA	NA	ZSCAN5A				1
chr9	48959340	48959409	69	0.3111	0.0444	14	2	0.00169	9.71934	NA	NA
chr21	43404918	43404989	71	0.3111	0.0444	14	2	0.00169	9.71934	NA	NA
chr15	99517644	99518261	617	0.3111	0.0444	14	2	0.00169	9.71934	NA	NA
chr20	65420687	65420959	272	0.3111	0.0444	14	2	0.00169	9.71934	0	0	GMEB2				1
chr10	61220043	61220330	287	0.9556	0.6889	43	31	0.00169	9.71934	NA	NA	ANK3				1
chr6	169336018	169338265	2247	0.3111	0.0444	14	2	0.00169	9.71934	0.00157	9e-05	KIF25				1
chr7	63547946	63548288	342	0.3111	0.0444	14	2	0.00169	9.71934	NA	NA
chr16	51994584	51994923	339	0.0444	0.3111	2	14	0.00169	0.102888	NA	NA
chr18	47591801	47592093	292	0.3111	0.0444	14	2	0.00169	9.71934	0.00193	0.0007
chr9	46992083	46992422	339	0.0444	0.3111	2	14	0.00169	0.102888	NA	NA
chr2	116168410	116170599	2189	0.3111	0.0444	14	2	0.00169	9.71934	0.19065	0.02606	DPP10				1
chr2	134648653	134652083	3430	0.9556	0.6889	43	31	0.00169	9.71934	NA	NA	MGAT5				1
chr17	26660385	26660552	167	0.0444	0.3111	2	14	0.00169	0.102888	NA	NA
chr5	47674254	47674934	680	0.0444	0.3111	2	14	0.00169	0.102888	NA	NA
chrX	25407857	25408068	211	0.3111	0.0444	14	2	0.00169	9.71934	NA	NA
chr15	18005837	18005955	118	0.0444	0.3111	2	14	0.00169	0.102888	NA	NA
chr19	28963190	28963530	340	0.3111	0.0444	14	2	0.00169	9.71934	NA	NA
chr12	104936889	104941372	4483	0.3111	0.0444	14	2	0.00169	9.71934	0.05272	0.0338
chr20	49646859	49647937	1078	0.6889	0.9556	31	43	0.00169	0.102888	NA	NA
chr13	17515570	17515754	184	0.9556	0.6889	43	31	0.00169	9.71934	NA	NA
chr4	49060916	49062500	1584	0.0444	0.3111	2	14	0.00169	0.102888	NA	NA
chr18	20324560	20325235	675	0.0444	0.3111	2	14	0.00169	0.102888	NA	NA
chr11	54922847	54929582	6735	0.0444	0.3111	2	14	0.00169	0.102888	NA	NA
chr8	12411954	12412320	366	0.0444	0.3111	2	14	0.00169	0.102888	NA	NA
chr18	16213138	16213814	676	0.3111	0.0444	14	2	0.00169	9.71934	NA	NA
chr1	4731501	4731561	60	0.3111	0.0444	14	2	0.00169	9.71934	NA	NA
chr14	7475215	7475385	170	0.3111	0.0444	14	2	0.00169	9.71934	NA	NA
chr19	25842639	25844673	2034	0.3111	0.0444	14	2	0.00169	9.71934	NA	NA
chr22	12886328	12887689	1361	0.3111	0.0444	14	2	0.00169	9.71934	NA	NA
chr21	9416732	9418139	1407	0.6889	0.9556	31	43	0.00169	0.102888	NA	NA
chr15	9657486	9659040	1554	0.3111	0.0444	14	2	0.00169	9.71934	NA	NA
chr15	6184756	6185596	840	0.3111	0.0444	14	2	0.00169	9.71934	NA	NA
chr22	8722686	8726111	3425	0.0444	0.3111	2	14	0.00169	0.102888	NA	NA
chr2	1586927	1587714	787	0.0444	0.3111	2	14	0.00169	0.102888	0.00851	0.00376
chr21	491913	492050	137	0.0444	0.3111	2	14	0.00169	0.102888	NA	NA
chr17	252714	252776	62	0.6889	0.9556	31	43	0.00169	0.102888	NA	NA
chr15	1186769	1192825	6056	0.3111	0.0444	14	2	0.00169	9.71934	NA	NA
chr19	183753	185843	2090	0.3111	0.0444	14	2	0.00169	9.71934	NA	NA
chr17	54956921	54966259	9338	0.3111	0.0444	14	2	0.00169	9.71934	0.00183	0.00085
chr5	1130461	1130605	144	0.3111	0.0444	14	2	0.00169	9.71934	NA	NA	SLC6A19			1
chr4	192817470	192817632	162	0.5333	0.2	24	9	0.00197	4.57082	NA	NA
chr15	92006359	92006479	120	0.4667	0.8	21	36	0.00197	0.218779	NA	NA	MCTP2				1
chr19	55772049	55772102	53	0.2	0.5333	9	24	0.00197	0.218779	NA	NA	ZNF83				1
chr2	43137858	43137918	60	0.5333	0.2	24	9	0.00197	4.57082	NA	NA
chr17	60911260	60911482	222	0.8	0.4667	36	21	0.00197	4.57082	NA	NA	HEATR6			1
chr14	36626429	36626522	93	0.2	0.5333	9	24	0.00197	0.218779	0	0
chr22	38652791	38652901	110	0.8	0.4667	36	21	0.00197	4.57082	NA	NA	PLA2G6				1
chr9	46888816	46888987	171	0.4667	0.8	21	36	0.00197	0.218779	NA	NA
chr10	64639290	64640053	763	0.2	0.5333	9	24	0.00197	0.218779	NA	NA
chr9	47209213	47209893	680	0.2	0.5333	9	24	0.00197	0.218779	NA	NA
chr1	120449915	120456267	6352	0.8	0.4667	36	21	0.00197	4.57082	NA	NA
chrX	25408045	25408370	325	0.4667	0.8	21	36	0.00197	0.218779	NA	NA
chr7	60469348	60472752	3404	0.5333	0.2	24	9	0.00197	4.57082	NA	NA
chr12	31710798	31711900	1102	0.5333	0.2	24	9	0.00197	4.57082	NA	NA
chr18	20318573	20319249	676	0.4667	0.8	21	36	0.00197	0.218779	NA	NA
chr9	7363648	7363783	135	0.8	0.4667	36	21	0.00197	4.57082	NA	NA
chr2	233632207	233632267	60	0.8667	0.5556	39	25	0.00214	5.20056	NA	NA	INPP5D				1
chr7	159056613	159056715	102	0.1333	0.4444	6	20	0.00214	0.192287	NA	NA	PTPRN2				1
chr6	102935554	102935657	103	0.4444	0.1333	20	6	0.00214	5.20056	NA	NA	GRIK2				1
chr12	132524945	132525181	236	0.4444	0.1333	20	6	0.00214	5.20056	0.00064	9e-05
chr1	69793473	69793624	151	0.4444	0.1333	20	6	0.00214	5.20056	NA	NA	LRRC7				1
chr6	68228479	68228794	315	0.5556	0.8667	25	39	0.00214	0.192287	NA	NA
chr6	41445435	41445562	127	0.4444	0.1333	20	6	0.00214	5.20056	NA	NA
chr9	48943587	48946181	2594	0.5556	0.8667	25	39	0.00214	0.192287	NA	NA
chr9	48912143	48914737	2594	0.4444	0.1333	20	6	0.00214	5.20056	NA	NA
chr9	46818555	46822641	4086	0.1333	0.4444	6	20	0.00214	0.192287	NA	NA
chr21	11299716	11300057	341	0.4444	0.1333	20	6	0.00214	5.20056	NA	NA
chr21	9406617	9409440	2823	0.1333	0.4444	6	20	0.00214	0.192287	NA	NA
chr10	536969	537061	92	0.4444	0.1333	20	6	0.00214	5.20056	NA	NA	DIP2C				1
chrY	962970	963618	648	0.4444	0.1333	20	6	0.00214	5.20056	NA	NA
chr22	2060666	2064547	3881	0.4444	0.1333	20	6	0.00214	5.20056	NA	NA
chr5	192232	192307	75	0.4444	0.1333	20	6	0.00214	5.20056	NA	NA	CCDC127			1
chr2	124221833	124221885	52	0.5556	0.2222	25	10	0.00224	4.37635	NA	NA
chr4	121043449	121043503	54	0.4444	0.7778	20	35	0.00224	0.228501	NA	NA
chr2	76079553	76079665	112	0.5556	0.2222	25	10	0.00224	4.37635	NA	NA
chr2	241423746	241425068	1322	0.2222	0.5556	10	25	0.00224	0.228501	0.00779	0.00254	CROCC2				1
chr6	65840350	65840494	144	0.5556	0.2222	25	10	0.00224	4.37635	NA	NA	EYS				1
chr2	94581920	94582600	680	0.2222	0.5556	10	25	0.00224	0.228501	NA	NA
chr14	60550892	60551204	312	0.5556	0.2222	25	10	0.00224	4.37635	0.34006	0.12239
chr7	63648840	63650541	1701	0.5556	0.2222	25	10	0.00224	4.37635	NA	NA
chr19	7878900	7878978	78	0.2222	0.5556	10	25	0.00224	0.228501	0	0.00032
chr19	5748086	5748241	155	0.5556	0.2222	25	10	0.00224	4.37635	NA	NA	CATSPERD				1
chr4	3412628	3412733	105	0.5556	0.2222	25	10	0.00224	4.37635	NA	NA	RGS12				1
chr10	1459011	1459453	442	0.2222	0.5556	10	25	0.00224	0.228501	NA	NA	ADARB2				1
chrY	336541	336599	58	0.5556	0.2222	25	10	0.00224	4.37635	NA	NA
chr5	169282462	169282553	91	0.3778	0.0889	17	4	0.00225	6.22295	NA	NA	SLIT3				1
chr6	170477820	170477928	108	0.0889	0.3778	4	17	0.00225	0.160696	NA	NA
chr9	138690232	138690322	90	0.3778	0.0889	17	4	0.00225	6.22295	NA	NA	MVB12B				1
chr3	153571183	153571310	127	0.0889	0.3778	4	17	0.00225	0.160696	NA	NA
chr9	103050615	103050675	60	0.0889	0.3778	4	17	0.00225	0.160696	NA	NA	SYK				1
chrX	141418837	141418956	119	0.3778	0.0889	17	4	0.00225	6.22295	NA	NA
chr16	95718868	95718943	75	0.0889	0.3778	4	17	0.00225	0.160696	0.00058	0.0001	DPEP1				1
chr3	141588886	141589103	217	0.0889	0.3778	4	17	0.00225	0.160696	NA	NA
chr2	91194323	91194421	98	0.9111	0.6222	41	28	0.00225	6.22295	NA	NA
chr8	126010902	126011188	286	0.3778	0.0889	17	4	0.00225	6.22295	NA	NA
chr10	105981465	105981720	255	0.0889	0.3778	4	17	0.00225	0.160696	0.11151	0.1088	SORCS3				1
chr3	145794484	145795014	530	0.6222	0.9111	28	41	0.00225	0.160696	0.02252	0.00636	U2SURP				1
chr2	91193257	91193482	225	0.9111	0.6222	41	28	0.00225	6.22295	NA	NA
chr9	48271680	48271744	64	0.3778	0.0889	17	4	0.00225	6.22295	NA	NA
chr2	92868962	92869300	338	0.0889	0.3778	4	17	0.00225	0.160696	NA	NA
chr5	39915203	39915307	104	0.3778	0.0889	17	4	0.00225	6.22295	0.10062	0.05707
chr12	55872740	55872998	258	0.0889	0.3778	4	17	0.00225	0.160696	NA	NA	PYM1				1
chr6	57658780	57659132	352	0.3778	0.0889	17	4	0.00225	6.22295	NA	NA
chr1	36821108	36821252	144	0.3778	0.0889	17	4	0.00225	6.22295	NA	NA	GRIK3				1
chr9	75156269	75157121	852	0.0889	0.3778	4	17	0.00225	0.160696	NA	NA
chr5	50536859	50537539	680	0.3778	0.0889	17	4	0.00225	6.22295	NA	NA
chr9	114126531	114136168	9637	0.0889	0.3778	4	17	0.00225	0.160696	0.13888	0.17552
chr18	16689527	16689868	341	0.3778	0.0889	17	4	0.00225	6.22295	NA	NA
chr16	830165	830365	200	0.0889	0.3778	4	17	0.00225	0.160696	NA	NA
chr2	241284140	241285177	1037	0.3778	0.0889	17	4	0.00225	6.22295	0.00111	0.00088	KIF1A				1
chr12	128877976	128878029	53	0.7556	0.4222	34	19	0.00248	4.23107	NA	NA
chr2	123670257	123670471	214	0.2444	0.5778	11	26	0.00248	0.236347	8e-05	2e-05
chr3	154181701	154187780	6079	0.4222	0.7556	19	34	0.00248	0.236347	NA	NA	MED12L				1	IGSF10				1
chr13	36717176	36730812	13636	0.7556	0.4222	34	19	0.00248	4.23107	0.31166	0.33481
chr1	248213921	248213982	61	0	0.2	0	9	0.00251	0	NA	NA
chr2	239058463	239058528	65	0.2	0	9	0	0.00251	Inf	NA	NA
chr1	207935579	207935637	58	0.2	0	9	0	0.00251	Inf	0.00016	5e-05
chr2	234416760	234416850	90	0.2	0	9	0	0.00251	Inf	0.00059	0.00023	TRPM8				1
chr1	198592391	198592451	60	0.2	0	9	0	0.00251	Inf	0.06775	0.01133
chr2	184936699	184936754	55	0.2	0	9	0	0.00251	Inf	NA	NA
chr1	209229357	209229437	80	0.2	0	9	0	0.00251	Inf	NA	NA	SYT14				1
chr1	246870546	246870672	126	0.2	0	9	0	0.00251	Inf	NA	NA	NLRP3				1
chr7	158934578	158934629	51	0	0.2	0	9	0.00251	0	NA	NA	PTPRN2				1
chr5	148744350	148744402	52	0	0.2	0	9	0.00251	0	NA	NA	SPINK6				1
chr2	170218587	170218665	78	0.2	0	9	0	0.00251	Inf	NA	NA	KLHL23				1
chr9	148864326	148864386	60	0.2	0	9	0	0.00251	Inf	NA	NA
chr4	192258476	192258596	120	0.2	0	9	0	0.00251	Inf	NA	NA
chr4	159670693	159670778	85	0	0.2	0	9	0.00251	0	NA	NA
chr4	193003530	193003674	144	0.2	0	9	0	0.00251	Inf	NA	NA
chr2	232314880	232315098	218	0.2	0	9	0	0.00251	Inf	NA	NA
chr12	132648062	132648139	77	0.2	0	9	0	0.00251	Inf	NA	NA
chr1	212980262	212980449	187	0	0.2	0	9	0.00251	0	NA	NA
chr1	163560712	163560825	113	0	0.2	0	9	0.00251	0	0.04169	0.07352
chr5	119636356	119636416	60	0	0.2	0	9	0.00251	0	0	0	DMXL1				1
chr9	147756289	147756386	97	0.2	0	9	0	0.00251	Inf	NA	NA
chr12	130577399	130577475	76	0.2	0	9	0	0.00251	Inf	NA	NA	RIMBP2				1
chr4	113940153	113940213	60	0.2	0	9	0	0.00251	Inf	0.01707	0.00093	PITX2				1
chr10	109205026	109205080	54	0	0.2	0	9	0.00251	0	NA	NA
chr1	111516775	111516833	58	0.2	0	9	0	0.00251	Inf	NA	NA	ADORA3				1	TMIGD3				1
chr8	136653310	136653401	91	0.2	0	9	0	0.00251	Inf	NA	NA	KHDRBS3				1
chr8	143150126	143150232	106	0.2	0	9	0	0.00251	Inf	NA	NA
chrX	97290574	97290626	52	0.2	0	9	0	0.00251	Inf	NA	NA
chr13	100549531	100549584	53	0	0.2	0	9	0.00251	0	NA	NA	NALCN				1
chr8	144778171	144778300	129	0.2	0	9	0	0.00251	Inf	NA	NA
chr2	91228207	91228259	52	0	0.2	0	9	0.00251	0	NA	NA
chr3	143996160	143996294	134	0.2	0	9	0	0.00251	Inf	NA	NA	PXYLP1				1
chr2	110999475	110999558	83	0	0.2	0	9	0.00251	0	NA	NA	RGPD6				1	RGPD5				1
chr8	102634840	102634913	73	0.2	0	9	0	0.00251	Inf	NA	NA	GRHL2				1
chr7	136237257	136237389	132	0.2	0	9	0	0.00251	Inf	NA	NA	CALD1				1
chr13	112607175	112607265	90	0	0.2	0	9	0.00251	0	NA	NA	GRTP1				1
chr9	133286144	133286284	140	0.2	0	9	0	0.00251	Inf	0.03498	0.01765	CNTRL				1
chr1	90154426	90154490	64	0.2	0	9	0	0.00251	Inf	NA	NA
chr7	160563740	160563943	203	0	0.2	0	9	0.00251	0	NA	NA
chr1	127067349	127067478	129	0	0.2	0	9	0.00251	0	NA	NA
chr3	81345635	81345689	54	0	0.2	0	9	0.00251	0	NA	NA
chr6	102271710	102271795	85	0.2	0	9	0	0.00251	Inf	NA	NA	GRIK2				1
chr4	193365026	193365338	312	0.2	0	9	0	0.00251	Inf	NA	NA
chr13	110931226	110931329	103	0.2	0	9	0	0.00251	Inf	NA	NA
chr3	78766636	78766688	52	0	0.2	0	9	0.00251	0	0.00032	0.00014	ROBO1				1
chr4	77907451	77907503	52	0	0.2	0	9	0.00251	0	NA	NA
chr3	101396508	101396601	93	0.2	0	9	0	0.00251	Inf	NA	NA
chr9	122873019	122873168	149	0.2	0	9	0	0.00251	Inf	NA	NA	MUSK				1
chr2	86916502	86916576	74	0	0.2	0	9	0.00251	0	NA	NA	RGPD1				1
chr2	168745281	168745571	290	1	0.8	45	36	0.00251	Inf	NA	NA
chr18	78242830	78242895	65	0.2	0	9	0	0.00251	Inf	NA	NA
chr3	111295915	111296051	136	0.2	0	9	0	0.00251	Inf	NA	NA	CIP2A				1
chrX	76704530	76704594	64	0.2	0	9	0	0.00251	Inf	NA	NA
chr10	121256759	121256932	173	0.2	0	9	0	0.00251	Inf	NA	NA
chr20	65669718	65669769	51	0.2	0	9	0	0.00251	Inf	NA	NA
chr3	198578406	198578886	480	0	0.2	0	9	0.00251	0	NA	NA	MUC4				1
chr18	77348951	77349025	74	0	0.2	0	9	0.00251	0	NA	NA	MBP				1
chr9	75912746	75912816	70	0	0.2	0	9	0.00251	0	NA	NA
chr5	66706597	66706652	55	0.2	0	9	0	0.00251	Inf	NA	NA
chr15	75846892	75846964	72	0	0.2	0	9	0.00251	0	NA	NA	TBC1D2B				1
chr7	69217599	69217659	60	0	0.2	0	9	0.00251	0	NA	NA
chr17	83978466	83978558	92	0.2	0	9	0	0.00251	Inf	NA	NA	B3GNTL1				1
chr9	64473855	64473910	55	0.2	0	9	0	0.00251	Inf	NA	NA
chr14	78149431	78149512	81	0.2	0	9	0	0.00251	Inf	NA	NA
chr6	167665212	167665596	384	0	0.2	0	9	0.00251	0	NA	NA
chr11	129621306	129621540	234	0.2	0	9	0	0.00251	Inf	0.01807	0.01323
chr1	78120922	78121008	86	0.2	0	9	0	0.00251	Inf	0.01846	0.02973
chr4	190312935	190313459	524	0.2	0	9	0	0.00251	Inf	NA	NA
chr20	64830253	64830315	62	0	0.2	0	9	0.00251	0	NA	NA
chr15	58319447	58319501	54	0.2	0	9	0	0.00251	Inf	NA	NA	RORA				1
chr12	114040771	114040988	217	0.2	0	9	0	0.00251	Inf	NA	NA
chr18	63991073	63991142	69	0.2	0	9	0	0.00251	Inf	NA	NA	SERPINB7				1
chr7	84867810	84867938	128	0.2	0	9	0	0.00251	Inf	NA	NA	SEMA3E				1
chr13	85983053	85983185	132	0	0.2	0	9	0.00251	0	NA	NA
chr13	54980240	54980296	56	0.2	0	9	0	0.00251	Inf	NA	NA
chr3	90868455	90868624	169	0.2	0	9	0	0.00251	Inf	NA	NA
chr12	132291539	132291896	357	0	0.2	0	9	0.00251	0	NA	NA	GALNT9				1
chr9	75080453	75080568	115	0	0.2	0	9	0.00251	0	NA	NA
chrX	78894777	78894907	130	0	0.2	0	9	0.00251	0	NA	NA
chr9	74153278	74153398	120	0.2	0	9	0	0.00251	Inf	NA	NA
chr2	232320173	232321364	1191	0.2	0	9	0	0.00251	Inf	8e-05	2e-05
chr9	75870487	75870622	135	0	0.2	0	9	0.00251	0	NA	NA
chr11	71429624	71429744	120	0.2	0	9	0	0.00251	Inf	0.00016	2e-05	NADSYN1				1
chr9	55611068	55611143	75	0.2	0	9	0	0.00251	Inf	NA	NA
chr22	50845464	50845527	63	0.2	0	9	0	0.00251	Inf	NA	NA
chr17	84023556	84023728	172	0	0.2	0	9	0.00251	0	NA	NA	B3GNTL1				1
chr18	49487208	49487268	60	0	0.2	0	9	0.00251	0	NA	NA	DYM				1
chr9	48529646	48529706	60	0.2	0	9	0	0.00251	Inf	NA	NA
chr22	44682142	44682193	51	0.2	0	9	0	0.00251	Inf	NA	NA	PARVG				1
chr4	120500425	120500799	374	0.2	0	9	0	0.00251	Inf	0	2e-05
chr2	56614419	56614503	84	0.2	0	9	0	0.00251	Inf	0.0202	0.00085
chr13	60572722	60572819	97	0.2	0	9	0	0.00251	Inf	NA	NA
chr3	198580573	198581629	1056	0.2	0	9	0	0.00251	Inf	NA	NA	MUC4				1
chr14	49923752	49923819	67	0.2	0	9	0	0.00251	Inf	NA	NA
chr9	49737244	49737314	70	0.2	0	9	0	0.00251	Inf	NA	NA
chr9	80031868	80032059	191	0	0.2	0	9	0.00251	0	NA	NA
chr9	74281947	74282121	174	0.2	0	9	0	0.00251	Inf	NA	NA
chr20	63354437	63354567	130	0.2	0	9	0	0.00251	Inf	0.00445	0.00207	CDH4				1
chr10	42264086	42264146	60	0.2	0	9	0	0.00251	Inf	NA	NA
chr10	72559761	72559941	180	0.2	0	9	0	0.00251	Inf	NA	NA	CDH23				1
chr9	75928220	75928425	205	0	0.2	0	9	0.00251	0	NA	NA
chr1	138505907	138506620	713	0	0.2	0	9	0.00251	0	NA	NA
chr20	36806798	36806850	52	0.2	0	9	0	0.00251	Inf	NA	NA	TRPC4AP				1
chr2	94287014	94287356	342	0.2	0	9	0	0.00251	Inf	NA	NA
chr21	44271331	44271409	78	0.2	0	9	0	0.00251	Inf	NA	NA	PCBP3				1
chr4	88870732	88871052	320	0.2	0	9	0	0.00251	Inf	NA	NA	ARHGAP24				1
chrX	81172442	81172710	268	0.2	0	9	0	0.00251	Inf	NA	NA
chr1	126794127	126794807	680	0.8	1	36	45	0.00251	0	NA	NA
chr16	39512421	39512489	68	0.2	0	9	0	0.00251	Inf	NA	NA
chr1	129118996	129119732	736	0.2	0	9	0	0.00251	Inf	NA	NA
chr6	172086044	172087360	1316	0	0.2	0	9	0.00251	0	NA	NA
chr18	49552359	49552470	111	0	0.2	0	9	0.00251	0	NA	NA	DYM				1
chr1	134826544	134827383	839	0	0.2	0	9	0.00251	0	NA	NA
chr12	131627663	131628477	814	0	0.2	0	9	0.00251	0	0.40884	0.38378
chr7	59740492	59740663	171	0	0.2	0	9	0.00251	0	NA	NA
chr1	235496353	235499108	2755	0.2	0	9	0	0.00251	Inf	NA	NA
chr1	129991558	129992424	866	0	0.2	0	9	0.00251	0	NA	NA
chr7	75572145	75572444	299	0	0.2	0	9	0.00251	0	0.12405	0.1154	CLIP2				1
chr15	39462488	39462570	82	0	0.2	0	9	0.00251	0	NA	NA	MGA				1
chr9	75748037	75748342	305	0	0.2	0	9	0.00251	0	NA	NA
chr3	32641365	32641422	57	0.2	0	9	0	0.00251	Inf	0.00104	3e-05
chr22	44597053	44597160	107	0.2	0	9	0	0.00251	Inf	NA	NA	PARVB				1
chr21	44551133	44551251	118	0	0.2	0	9	0.00251	0	NA	NA	SPATC1L				1
chr9	51088396	51088556	160	0	0.2	0	9	0.00251	0	NA	NA
chr6	30894755	30894815	60	0	0.2	0	9	0.00251	0	NA	NA	MUC22	1
chr14	94159396	94159975	579	0	0.2	0	9	0.00251	0	NA	NA	EML1				1
chr12	121740672	121741664	992	0.2	0	9	0	0.00251	Inf	NA	NA	TMEM120B				1
chr2	59091264	59091506	242	0.2	0	9	0	0.00251	Inf	NA	NA
chr3	198576102	198578886	2784	0	0.2	0	9	0.00251	0	NA	NA	MUC4				1
chrX	50892729	50892921	192	0.2	0	9	0	0.00251	Inf	NA	NA
chr2	94586617	94587296	679	0.2	0	9	0	0.00251	Inf	NA	NA
chr2	94551928	94552608	680	0	0.2	0	9	0.00251	0	NA	NA
chr2	94295865	94296545	680	0	0.2	0	9	0.00251	0	NA	NA
chr9	46070305	46070469	164	0	0.2	0	9	0.00251	0	NA	NA
chr1	108515874	108516786	912	0	0.2	0	9	0.00251	0	NA	NA
chr7	31524936	31525014	78	0	0.2	0	9	0.00251	0	0.00024	0.00014
chr2	92642547	92643226	679	0.2	0	9	0	0.00251	Inf	NA	NA
chr13	111544925	111545910	985	0	0.2	0	9	0.00251	0	NA	NA
chr7	63574836	63575178	342	0.2	0	9	0	0.00251	Inf	NA	NA
chr11	45893932	45894110	178	0	0.2	0	9	0.00251	0	9e-05	0
chr3	94139026	94139781	755	0	0.2	0	9	0.00251	0	NA	NA
chr7	158920327	158922491	2164	0.2	0	9	0	0.00251	Inf	0.01245	0.01769	PTPRN2				1
chr13	111547515	111548603	1088	0.2	0	9	0	0.00251	Inf	NA	NA
chr9	25295888	25295944	56	0	0.2	0	9	0.00251	0	NA	NA
chr9	75937649	75938158	509	0	0.2	0	9	0.00251	0	NA	NA
chr9	55610087	55610362	275	0.2	0	9	0	0.00251	Inf	NA	NA
chr20	64003985	64004358	373	0	0.2	0	9	0.00251	0	NA	NA
chr19	24731843	24731899	56	0.2	0	9	0	0.00251	Inf	NA	NA
chr7	60459972	60460312	340	0.2	0	9	0	0.00251	Inf	NA	NA
chr1	126605208	126606739	1531	0	0.2	0	9	0.00251	0	NA	NA
chr13	111541781	111542970	1189	0	0.2	0	9	0.00251	0	NA	NA
chrX	23630764	23630818	54	0.2	0	9	0	0.00251	Inf	NA	NA
chr6	97364394	97365408	1014	0.2	0	9	0	0.00251	Inf	NA	NA	FUT9				1
chr2	91545368	91546266	898	0	0.2	0	9	0.00251	0	NA	NA
chr9	72881784	72882356	572	0	0.2	0	9	0.00251	0	NA	NA
chrX	24795331	24795400	69	0.2	0	9	0	0.00251	Inf	0	2e-05
chr21	38907060	38907230	170	0.2	0	9	0	0.00251	Inf	NA	NA	DSCAM				1
chr7	68399560	68400108	548	0.2	0	9	0	0.00251	Inf	NA	NA	TYW1				1
chr4	25231144	25231224	80	0.2	0	9	0	0.00251	Inf	NA	NA	PI4K2B				1
chr1	121754695	121756561	1866	0	0.2	0	9	0.00251	0	NA	NA
chr9	51089442	51089782	340	0	0.2	0	9	0.00251	0	NA	NA
chr9	75849696	75850451	755	0	0.2	0	9	0.00251	0	NA	NA
chr7	159342000	159345381	3381	0.2	0	9	0	0.00251	Inf	NA	NA	PTPRN2				1
chr9	19648945	19648997	52	0	0.2	0	9	0.00251	0	NA	NA	SLC24A2				1
chr13	25688666	25688756	90	0.2	0	9	0	0.00251	Inf	NA	NA
chr4	135069551	135072042	2491	0	0.2	0	9	0.00251	0	NA	NA
chr17	22280018	22280088	70	0	0.2	0	9	0.00251	0	NA	NA
chr1	145183581	145186727	3146	0	0.2	0	9	0.00251	0	NA	NA
chr8	145020455	145023641	3186	0.2	0	9	0	0.00251	Inf	NA	NA	EPPK1	3
chr21	22215815	22215890	75	0	0.2	0	9	0.00251	0	NA	NA
chr2	94411983	94413343	1360	0.2	0	9	0	0.00251	Inf	NA	NA
chr2	94142659	94144021	1362	0	0.2	0	9	0.00251	0	NA	NA
chr19	61634911	61635496	585	0.2	0	9	0	0.00251	Inf	NA	NA
chr7	66705502	66706196	694	0.2	0	9	0	0.00251	Inf	NA	NA
chr3	18598549	18598603	54	0.2	0	9	0	0.00251	Inf	NA	NA
chr12	121740584	121742976	2392	0	0.2	0	9	0.00251	0	0.00104	0.00132	TMEM120B				1
chr3	91295721	91297080	1359	0.2	0	9	0	0.00251	Inf	NA	NA
chr7	63560980	63561659	679	0.2	0	9	0	0.00251	Inf	NA	NA
chr10	21079929	21080007	78	0.2	0	9	0	0.00251	Inf	0.00016	7e-05	NEBL				1
chr5	21818609	21818693	84	0.2	0	9	0	0.00251	Inf	NA	NA
chr9	55616158	55616742	584	0.2	0	9	0	0.00251	Inf	NA	NA
chr6	19508518	19508591	73	0	0.2	0	9	0.00251	0	9e-05	0.00015
chr19	16197534	16197586	52	0	0.2	0	9	0.00251	0	NA	NA
chr10	41125608	41125948	340	0	0.2	0	9	0.00251	0	NA	NA
chr10	40945853	40946193	340	0.2	0	9	0	0.00251	Inf	NA	NA
chr18	74430642	74431828	1186	0.2	0	9	0	0.00251	Inf	NA	NA
chr9	51088964	51089537	573	0.2	0	9	0	0.00251	Inf	NA	NA
chr9	47565178	47565690	512	0.2	0	9	0	0.00251	Inf	NA	NA
chr2	94583212	94585250	2038	0	0.2	0	9	0.00251	0	NA	NA
chr2	94576896	94578935	2039	0.2	0	9	0	0.00251	Inf	NA	NA
chr2	94485008	94487048	2040	0.2	0	9	0	0.00251	Inf	NA	NA
chr10	129362861	129366721	3860	0	0.2	0	9	0.00251	0	NA	NA
chr2	93979525	93981564	2039	0	0.2	0	9	0.00251	0	NA	NA
chr9	47017243	47017755	512	0	0.2	0	9	0.00251	0	NA	NA
chr17	26807010	26807177	167	0.2	0	9	0	0.00251	Inf	NA	NA
chr2	67916177	67917251	1074	0.2	0	9	0	0.00251	Inf	NA	NA
chr7	32268214	32268459	245	0.2	0	9	0	0.00251	Inf	0.07275	0.05424	PDE1C				1
chr7	63567313	63568335	1022	0.2	0	9	0	0.00251	Inf	NA	NA
chr8	44862505	44863018	513	0	0.2	0	9	0.00251	0	NA	NA
chr16	18270844	18270930	86	0.2	0	9	0	0.00251	Inf	NA	NA
chr16	91473544	91475712	2168	0.2	0	9	0	0.00251	Inf	NA	NA	GSE1				1
chr7	20414399	20414507	108	0.2	0	9	0	0.00251	Inf	NA	NA
chr16	35965858	35966198	340	0	0.2	0	9	0.00251	0	NA	NA
chr9	48516917	48517537	620	0.2	0	9	0	0.00251	Inf	NA	NA
chr15	99520278	99522896	2618	0.2	0	9	0	0.00251	Inf	NA	NA
chr4	135050324	135055291	4967	0	0.2	0	9	0.00251	0	NA	NA
chr7	60795448	60796470	1022	0.2	0	9	0	0.00251	Inf	NA	NA
chr17	22092871	22093011	140	0.2	0	9	0	0.00251	Inf	NA	NA
chr9	47366487	47367167	680	0.2	0	9	0	0.00251	Inf	NA	NA
chr3	96271935	96274825	2890	0.2	0	9	0	0.00251	Inf	NA	NA
chr9	74709267	74711075	1808	0	0.2	0	9	0.00251	0	NA	NA
chr9	45092085	45092765	680	0	0.2	0	9	0.00251	0	NA	NA
chr7	63550384	63551746	1362	0.2	0	9	0	0.00251	Inf	NA	NA
chr9	72560975	72562752	1777	0.2	0	9	0	0.00251	Inf	NA	NA
chr9	76243338	76245344	2006	0	0.2	0	9	0.00251	0	NA	NA
chrX	58639601	58640807	1206	0	0.2	0	9	0.00251	0	NA	NA
chr3	13957445	13957515	70	0	0.2	0	9	0.00251	0	NA	NA
chr13	112633575	112638153	4578	0	0.2	0	9	0.00251	0	0.01301	0.03972
chr19	55663593	55664785	1192	0.2	0	9	0	0.00251	Inf	0.06338	0.02867	ZNF701				1
chr19	18040899	18041027	128	0.2	0	9	0	0.00251	Inf	NA	NA
chr7	56576695	56577960	1265	0	0.2	0	9	0.00251	0	NA	NA
chr19	29331359	29331699	340	0.2	0	9	0	0.00251	Inf	NA	NA
chr9	73357132	73359264	2132	0	0.2	0	9	0.00251	0	NA	NA
chr19	28972662	28973002	340	0.2	0	9	0	0.00251	Inf	NA	NA
chr3	91296790	91300186	3396	0	0.2	0	9	0.00251	0	NA	NA
chr3	90978128	90981525	3397	0	0.2	0	9	0.00251	0	NA	NA
chr19	28682424	28682764	340	0.2	0	9	0	0.00251	Inf	NA	NA
chr19	28179383	28179722	339	0.2	0	9	0	0.00251	Inf	NA	NA
chr7	64961267	64963088	1821	0	0.2	0	9	0.00251	0	NA	NA
chr10	42460450	42461229	779	0.2	0	9	0	0.00251	Inf	NA	NA
chr19	27706917	27707257	340	0.2	0	9	0	0.00251	Inf	NA	NA
chr19	27659952	27660292	340	0.2	0	9	0	0.00251	Inf	NA	NA
chr18	79880462	79883330	2868	0.2	0	9	0	0.00251	Inf	NA	NA
chr9	74738564	74741086	2522	0.2	0	9	0	0.00251	Inf	NA	NA
chr4	54905365	54906735	1370	0.2	0	9	0	0.00251	Inf	NA	NA
chr19	27201923	27202263	340	0.2	0	9	0	0.00251	Inf	NA	NA
chr12	25218136	25218429	293	0.2	0	9	0	0.00251	Inf	NA	NA
chr12	16300793	16300916	123	0	0.2	0	9	0.00251	0	NA	NA	MGST1				1
chr8	21582417	21582636	219	0.2	0	9	0	0.00251	Inf	NA	NA
chr16	37847579	37848260	681	0.2	0	9	0	0.00251	Inf	NA	NA
chr1	126641584	126649234	7650	0	0.2	0	9	0.00251	0	NA	NA
chr17	60154657	60156448	1791	0.2	0	9	0	0.00251	Inf	0.17861	0.052
chr9	47319468	47320660	1192	0.2	0	9	0	0.00251	Inf	NA	NA
chr9	47230861	47232053	1192	0.2	0	9	0	0.00251	Inf	NA	NA
chr2	94285938	94290693	4755	0	0.2	0	9	0.00251	0	NA	NA
chr12	24947416	24947749	333	0	0.2	0	9	0.00251	0	NA	NA	IRAG2				1
chr18	49637477	49638827	1350	0	0.2	0	9	0.00251	0	0.00423	0.00436	DYM				1
chr7	60511703	60513747	2044	0.2	0	9	0	0.00251	Inf	NA	NA
chr2	10955125	10955192	67	0.2	0	9	0	0.00251	Inf	NA	NA
chr9	75807213	75810545	3332	0	0.2	0	9	0.00251	0	NA	NA
chr10	41874379	41875396	1017	0.2	0	9	0	0.00251	Inf	NA	NA
chr5	48154991	48156348	1357	0	0.2	0	9	0.00251	0	NA	NA
chr9	44995758	44996950	1192	0	0.2	0	9	0.00251	0	NA	NA
chrX	58380175	58382232	2057	0.2	0	9	0	0.00251	Inf	NA	NA
chrX	58190615	58192671	2056	0	0.2	0	9	0.00251	0	NA	NA
chrX	58110786	58112842	2056	0.2	0	9	0	0.00251	Inf	NA	NA
chrX	58093046	58095103	2057	0.2	0	9	0	0.00251	Inf	NA	NA
chr3	91249226	91254322	5096	0.2	0	9	0	0.00251	Inf	NA	NA
chr19	57326756	57328775	2019	0.2	0	9	0	0.00251	Inf	NA	NA	RPS9				1
chr19	57326752	57328775	2023	0.2	0	9	0	0.00251	Inf	NA	NA	RPS9				1
chr10	42875882	42877031	1149	0.2	0	9	0	0.00251	Inf	NA	NA
chr20	31829871	31830554	683	0.2	0	9	0	0.00251	Inf	NA	NA
chr16	48943459	48945077	1618	0	0.2	0	9	0.00251	0	NA	NA
chr20	31789884	31790567	683	0.2	0	9	0	0.00251	Inf	NA	NA
chr13	10396860	10396935	75	0.2	0	9	0	0.00251	Inf	NA	NA
chr16	37793539	37794552	1013	0.2	0	9	0	0.00251	Inf	NA	NA
chr5	50672156	50674033	1877	0.2	0	9	0	0.00251	Inf	NA	NA
chr10	42931437	42932794	1357	0.2	0	9	0	0.00251	Inf	NA	NA
chr16	8693485	8693542	57	0.2	0	9	0	0.00251	Inf	NA	NA
chr19	29730632	29731311	679	0.2	0	9	0	0.00251	Inf	NA	NA
chr7	59633217	59635950	2733	0.2	0	9	0	0.00251	Inf	NA	NA
chr19	29689648	29690328	680	0	0.2	0	9	0.00251	0	NA	NA
chr19	29519988	29520668	680	0	0.2	0	9	0.00251	0	NA	NA
chr16	36095358	36096378	1020	0.2	0	9	0	0.00251	Inf	NA	NA
chr19	29452178	29452858	680	0.2	0	9	0	0.00251	Inf	NA	NA
chr7	64965689	64969047	3358	0.2	0	9	0	0.00251	Inf	NA	NA
chr20	49579225	49581182	1957	0.2	0	9	0	0.00251	Inf	NA	NA
chr11	47664389	47666238	1849	0	0.2	0	9	0.00251	0	NA	NA	CELF1				1
chr18	20170371	20170707	336	0	0.2	0	9	0.00251	0	NA	NA
chr9	47542632	47544504	1872	0	0.2	0	9	0.00251	0	NA	NA
chr18	19636813	19637155	342	0	0.2	0	9	0.00251	0	NA	NA
chr18	19623555	19623897	342	0	0.2	0	9	0.00251	0	NA	NA
chr19	27228284	27228964	680	0.2	0	9	0	0.00251	Inf	NA	NA
chr9	48857691	48859944	2253	0	0.2	0	9	0.00251	0	NA	NA
chr9	47166480	47168690	2210	0.2	0	9	0	0.00251	Inf	NA	NA
chr4	17523523	17523836	313	0.2	0	9	0	0.00251	Inf	NA	NA
chr12	36474017	36475376	1359	0	0.2	0	9	0.00251	0	NA	NA
chr12	36319978	36321337	1359	0	0.2	0	9	0.00251	0	NA	NA
chr18	79883703	79890474	6771	0	0.2	0	9	0.00251	0	NA	NA
chr9	47231388	47233772	2384	0	0.2	0	9	0.00251	0	NA	NA
chr9	48948954	48951548	2594	0	0.2	0	9	0.00251	0	NA	NA
chr20	32103466	32104591	1125	0.2	0	9	0	0.00251	Inf	NA	NA
chr12	31710899	31712000	1101	0.2	0	9	0	0.00251	Inf	NA	NA
chr16	33657726	33658971	1245	0	0.2	0	9	0.00251	0	NA	NA
chr18	17274355	17274696	341	0	0.2	0	9	0.00251	0	NA	NA
chr9	47004302	47006854	2552	0	0.2	0	9	0.00251	0	NA	NA
chr19	29246142	29247161	1019	0.2	0	9	0	0.00251	Inf	NA	NA
chr20	30808760	30809955	1195	0.2	0	9	0	0.00251	Inf	NA	NA
chr22	20453595	20454129	534	0.2	0	9	0	0.00251	Inf	NA	NA
chr10	42876525	42878947	2422	0.2	0	9	0	0.00251	Inf	NA	NA
chr12	35627884	35629583	1699	0	0.2	0	9	0.00251	0	NA	NA
chr2	91441880	91454269	12389	0.2	0	9	0	0.00251	Inf	NA	NA
chr19	26151436	26152450	1014	0.2	0	9	0	0.00251	Inf	NA	NA
chr19	25969225	25970245	1020	0.2	0	9	0	0.00251	Inf	NA	NA
chr19	40096120	40098648	2528	0	0.2	0	9	0.00251	0	NA	NA
chr19	39983598	39986119	2521	0	0.2	0	9	0.00251	0	NA	NA
chr16	35873839	35875874	2035	0	0.2	0	9	0.00251	0	NA	NA
chr1	6840049	6840124	75	0	0.2	0	9	0.00251	0	0	0	CAMTA1				1
chr22	7177586	7177671	85	0.2	0	9	0	0.00251	Inf	NA	NA
chr19	27755633	27756993	1360	0.2	0	9	0	0.00251	Inf	NA	NA
chr10	13324997	13325316	319	0	0.2	0	9	0.00251	0	NA	NA
chr20	32062567	32064442	1875	0.2	0	9	0	0.00251	Inf	NA	NA
chr16	37775052	37777770	2718	0	0.2	0	9	0.00251	0	NA	NA
chr19	29348808	29350508	1700	0.2	0	9	0	0.00251	Inf	NA	NA
chr19	26249211	26250572	1361	0.2	0	9	0	0.00251	Inf	NA	NA
chr19	25937923	25939282	1359	0.2	0	9	0	0.00251	Inf	NA	NA
chr15	15958298	15958813	515	0.2	0	9	0	0.00251	Inf	NA	NA
chr20	31735192	31737242	2050	0.2	0	9	0	0.00251	Inf	NA	NA
chr9	44973517	44977938	4421	0	0.2	0	9	0.00251	0	NA	NA
chr5	37504340	37507449	3109	0	0.2	0	9	0.00251	0	0.03495	0.04797
chr13	17479809	17480488	679	0	0.2	0	9	0.00251	0	NA	NA
chr13	17489153	17489833	680	0	0.2	0	9	0.00251	0	NA	NA
chr22	9576386	9576591	205	0	0.2	0	9	0.00251	0	NA	NA
chr18	11177028	11177313	285	0.2	0	9	0	0.00251	Inf	NA	NA	PIEZO2				1
chr21	10955162	10955456	294	0.2	0	9	0	0.00251	Inf	NA	NA
chr21	6770658	6770771	113	0.2	0	9	0	0.00251	Inf	NA	NA
chr9	45042456	45047549	5093	0.2	0	9	0	0.00251	Inf	NA	NA
chr18	16351223	16351898	675	0	0.2	0	9	0.00251	0	NA	NA
chr18	19794757	19795775	1018	0	0.2	0	9	0.00251	0	NA	NA
chr16	35896489	35899886	3397	0.2	0	9	0	0.00251	Inf	NA	NA
chr21	41612280	41616872	4592	0	0.2	0	9	0.00251	0	NA	NA
chr21	11271386	11271725	339	0	0.2	0	9	0.00251	0	NA	NA
chr1	4996956	4997023	67	0.2	0	9	0	0.00251	Inf	0.02247	0.00117
chr10	42174288	42179261	4973	0	0.2	0	9	0.00251	0	NA	NA
chr10	41795649	41800741	5092	0.2	0	9	0	0.00251	Inf	NA	NA
chr19	25960005	25962043	2038	0.2	0	9	0	0.00251	Inf	NA	NA
chr18	20571518	20572877	1359	0	0.2	0	9	0.00251	0	NA	NA
chr18	20530213	20531571	1358	0.2	0	9	0	0.00251	Inf	NA	NA
chr18	20530230	20531588	1358	0	0.2	0	9	0.00251	0	NA	NA
chr9	48948954	48956736	7782	0	0.2	0	9	0.00251	0	NA	NA
chr18	20450008	20451368	1360	0.2	0	9	0	0.00251	Inf	NA	NA
chr18	17612177	17613195	1018	0	0.2	0	9	0.00251	0	NA	NA
chr18	20267383	20268743	1360	0.2	0	9	0	0.00251	Inf	NA	NA
chr22	14257468	14258148	680	0	0.2	0	9	0.00251	0	NA	NA
chr18	20157753	20159113	1360	0.2	0	9	0	0.00251	Inf	NA	NA
chr18	20113742	20115102	1360	0.2	0	9	0	0.00251	Inf	NA	NA
chr17	27219482	27222030	2548	0.2	0	9	0	0.00251	Inf	NA	NA
chr18	19823979	19825339	1360	0.2	0	9	0	0.00251	Inf	NA	NA
chr18	19818076	19819436	1360	0	0.2	0	9	0.00251	0	NA	NA
chr19	25187891	25190104	2213	0.2	0	9	0	0.00251	Inf	NA	NA
chr19	25948702	25951082	2380	0	0.2	0	9	0.00251	0	NA	NA
chr19	24686899	24689113	2214	0.2	0	9	0	0.00251	Inf	NA	NA
chr17	26836293	26839008	2715	0	0.2	0	9	0.00251	0	NA	NA
chr17	22017498	22019338	1840	0.2	0	9	0	0.00251	Inf	NA	NA
chr17	27402369	27405251	2882	0.2	0	9	0	0.00251	Inf	NA	NA
chr22	13084555	13085235	680	0.2	0	9	0	0.00251	Inf	NA	NA
chr17	22064778	22066843	2065	0.2	0	9	0	0.00251	Inf	NA	NA
chr18	20945330	20947201	1871	0.2	0	9	0	0.00251	Inf	NA	NA
chr20	30664847	30668948	4101	0.2	0	9	0	0.00251	Inf	NA	NA
chr4	4544547	4544639	92	0	0.2	0	9	0.00251	0	0.00016	0.00017
chr17	22107748	22109968	2220	0.2	0	9	0	0.00251	Inf	NA	NA
chr20	32809507	32814484	4977	0.2	0	9	0	0.00251	Inf	NA	NA
chr20	49650340	49661966	11626	0.2	0	9	0	0.00251	Inf	NA	NA
chr19	24580320	24583386	3066	0.2	0	9	0	0.00251	Inf	NA	NA
chr18	19836990	19839025	2035	0	0.2	0	9	0.00251	0	NA	NA
chr20	32843239	32848916	5677	0.2	0	9	0	0.00251	Inf	NA	NA
chr22	15701602	15702965	1363	0	0.2	0	9	0.00251	0	NA	NA
chr22	15387470	15388833	1363	0.2	0	9	0	0.00251	Inf	NA	NA
chr22	15315090	15316454	1364	0.2	0	9	0	0.00251	Inf	NA	NA
chr22	14967823	14969186	1363	0.2	0	9	0	0.00251	Inf	NA	NA
chr22	14940626	14941986	1360	0.2	0	9	0	0.00251	Inf	NA	NA
chr14	3268374	3268442	68	0.2	0	9	0	0.00251	Inf	NA	NA
chr18	20118934	20121654	2720	0.2	0	9	0	0.00251	Inf	NA	NA
chr18	20084115	20086834	2719	0.2	0	9	0	0.00251	Inf	NA	NA
chr18	15768525	15770226	1701	0	0.2	0	9	0.00251	0	NA	NA
chr19	16065930	16067770	1840	0.2	0	9	0	0.00251	Inf	0.00319	0.00124	CYP4F11				1
chr19	29048284	29054401	6117	0.2	0	9	0	0.00251	Inf	NA	NA
chr18	16375900	16377935	2035	0	0.2	0	9	0.00251	0	NA	NA
chr18	16117157	16119189	2032	0	0.2	0	9	0.00251	0	NA	NA
chr16	37800074	37811301	11227	0.2	0	9	0	0.00251	Inf	NA	NA
chr3	2740048	2740107	59	0.2	0	9	0	0.00251	Inf	NA	NA	CNTN4				1
chr22	13042078	13043444	1366	0	0.2	0	9	0.00251	0	NA	NA
chr22	13017088	13018449	1361	0.2	0	9	0	0.00251	Inf	NA	NA
chr22	12970740	12972102	1362	0.2	0	9	0	0.00251	Inf	NA	NA
chr18	16353133	16355504	2371	0.2	0	9	0	0.00251	Inf	NA	NA
chr10	4121234	4121385	151	0	0.2	0	9	0.00251	0	NA	NA
chr18	16238850	16241218	2368	0.2	0	9	0	0.00251	Inf	NA	NA
chr2	3268629	3268725	96	0.2	0	9	0	0.00251	Inf	NA	NA	EIPR1				1
chr14	7512934	7513446	512	0	0.2	0	9	0.00251	0	NA	NA
chr22	12806701	12808236	1535	0.2	0	9	0	0.00251	Inf	NA	NA
chr13	10326296	10327315	1019	0.2	0	9	0	0.00251	Inf	NA	NA
chr18	20914267	20918680	4413	0.2	0	9	0	0.00251	Inf	NA	NA
chr22	15249196	15251582	2386	0	0.2	0	9	0.00251	0	NA	NA
chr18	16210142	16212848	2706	0.2	0	9	0	0.00251	Inf	NA	NA
chr21	11289856	11291222	1366	0.2	0	9	0	0.00251	Inf	NA	NA
chr22	15686191	15688919	2728	0.2	0	9	0	0.00251	Inf	NA	NA
chr15	12675827	12677616	1789	0.2	0	9	0	0.00251	Inf	NA	NA
chr22	15424276	15427003	2727	0.2	0	9	0	0.00251	Inf	NA	NA
chr22	14898388	14901114	2726	0.2	0	9	0	0.00251	Inf	NA	NA
chr18	16187055	16190439	3384	0.2	0	9	0	0.00251	Inf	NA	NA
chr20	32819607	32833643	14036	0	0.2	0	9	0.00251	0	NA	NA
chr18	15980839	15984222	3383	0.2	0	9	0	0.00251	Inf	NA	NA
chr14	10112400	10113764	1364	0	0.2	0	9	0.00251	0	NA	NA
chr18	15792441	15795842	3401	0.2	0	9	0	0.00251	Inf	NA	NA
chr17	3756656	3756858	202	0.2	0	9	0	0.00251	Inf	NA	NA	CAMKK1				1
chr21	9440693	9442104	1411	0	0.2	0	9	0.00251	0	NA	NA
chr22	12862196	12864924	2728	0.2	0	9	0	0.00251	Inf	NA	NA
chr14	8183472	8184664	1192	0	0.2	0	9	0.00251	0	NA	NA
chr18	15993165	15997903	4738	0.2	0	9	0	0.00251	Inf	NA	NA
chr5	7309453	7310509	1056	0	0.2	0	9	0.00251	0	NA	NA
chr18	15928331	15933433	5102	0.2	0	9	0	0.00251	Inf	NA	NA
chr13	10313525	10315783	2258	0	0.2	0	9	0.00251	0	NA	NA
chr14	10107162	10109383	2221	0.2	0	9	0	0.00251	Inf	NA	NA
chr1	2808026	2808198	172	0.2	0	9	0	0.00251	Inf	NA	NA	PRDM16				1
chr14	5352991	5353632	641	0.2	0	9	0	0.00251	Inf	NA	NA
chr22	15552244	15557697	5453	0.2	0	9	0	0.00251	Inf	NA	NA
chr1	16633300	16639583	6283	0.2	0	9	0	0.00251	Inf	NA	NA	NBPF1	6		5	6
chr22	13016281	13020371	4090	0.2	0	9	0	0.00251	Inf	NA	NA
chr22	12953724	12957809	4085	0.2	0	9	0	0.00251	Inf	NA	NA
chr13	10401750	10404480	2730	0.2	0	9	0	0.00251	Inf	NA	NA
chr20	32820002	32848436	28434	0.2	0	9	0	0.00251	Inf	NA	NA
chr21	10953520	10956826	3306	0.2	0	9	0	0.00251	Inf	NA	NA
chr15	1508211	1508277	66	0.2	0	9	0	0.00251	Inf	NA	NA
chr21	10908770	10912537	3767	0.2	0	9	0	0.00251	Inf	NA	NA
chr21	9413768	9416586	2818	0	0.2	0	9	0.00251	0	NA	NA
chr21	9396251	9399065	2814	0.2	0	9	0	0.00251	Inf	NA	NA
chr13	4806828	4807579	751	0	0.2	0	9	0.00251	0	NA	NA
chr21	10902367	10906389	4022	0.2	0	9	0	0.00251	Inf	NA	NA
chr22	3172298	3172671	373	0	0.2	0	9	0.00251	0	NA	NA
chr20	32070869	32109700	38831	0.2	0	9	0	0.00251	Inf	NA	NA
chr18	15785639	15795842	10203	0.2	0	9	0	0.00251	Inf	NA	NA
chr22	7066123	7068572	2449	0.2	0	9	0	0.00251	Inf	NA	NA
chr22	6905225	6907643	2418	0	0.2	0	9	0.00251	0	NA	NA
chr1	1716299	1716451	152	0	0.2	0	9	0.00251	0	NA	NA	SKI				1
chr16	1047964	1048024	60	0.2	0	9	0	0.00251	Inf	NA	NA
chr21	8182495	8186410	3915	0	0.2	0	9	0.00251	0	NA	NA
chr21	10907398	10914471	7073	0	0.2	0	9	0.00251	0	NA	NA
chr1	2211438	2211759	321	0.2	0	9	0	0.00251	Inf	NA	NA
chr22	3327659	3328410	751	0.2	0	9	0	0.00251	Inf	NA	NA
chr22	3088404	3089155	751	0.2	0	9	0	0.00251	Inf	NA	NA
chr22	6837472	6842308	4836	0.2	0	9	0	0.00251	Inf	NA	NA
chr22	3304827	3306040	1213	0	0.2	0	9	0.00251	0	NA	NA
chrX	1164263	1164451	188	0	0.2	0	9	0.00251	0	NA	NA
chr15	1519327	1519766	439	0.2	0	9	0	0.00251	Inf	NA	NA
chr14	1288611	1288985	374	0	0.2	0	9	0.00251	0	NA	NA
chr15	1522381	1522921	540	0.2	0	9	0	0.00251	Inf	NA	NA
chr15	1271953	1272330	377	0.2	0	9	0	0.00251	Inf	NA	NA
chr1	581865	581951	86	0.2	0	9	0	0.00251	Inf	0.00024	0.0001
chr15	1494353	1495066	713	0.2	0	9	0	0.00251	Inf	NA	NA
chr15	1362891	1363642	751	0.2	0	9	0	0.00251	Inf	NA	NA
chr22	2123093	2124999	1906	0.2	0	9	0	0.00251	Inf	NA	NA
chr14	1285203	1285959	756	0.2	0	9	0	0.00251	Inf	NA	NA
chr22	2512533	2516131	3598	0.2	0	9	0	0.00251	Inf	NA	NA
chr13	1127055	1127806	751	0.2	0	9	0	0.00251	Inf	NA	NA
chr14	1289986	1291119	1133	0.2	0	9	0	0.00251	Inf	NA	NA
chr15	1190067	1191122	1055	0.2	0	9	0	0.00251	Inf	NA	NA
chr19	487869	488047	178	0	0.2	0	9	0.00251	0	0.00631	0.00366	CDC34				1
chr22	2143782	2147864	4082	0.2	0	9	0	0.00251	Inf	NA	NA
chr16	963553	964385	832	0	0.2	0	9	0.00251	0	NA	NA	LMF1				1
chr2	440715	440902	187	0.2	0	9	0	0.00251	Inf	NA	NA
chr11	1503496	1505923	2427	0	0.2	0	9	0.00251	0	NA	NA	BRSK2				1
chr1	2195095	2200436	5341	0	0.2	0	9	0.00251	0	NA	NA
chr11	1503355	1505923	2568	0.2	0	9	0	0.00251	Inf	NA	NA	BRSK2				1
chr4	1432094	1435358	3264	0.2	0	9	0	0.00251	Inf	NA	NA
chr22	2126870	2134287	7417	0.2	0	9	0	0.00251	Inf	NA	NA
chr14	298949	299141	192	0	0.2	0	9	0.00251	0	NA	NA
chr10	511822	512479	657	0	0.2	0	9	0.00251	0	NA	NA	DIP2C				1
chr17	389714	390114	400	0.2	0	9	0	0.00251	Inf	0.14063	0.01898
chr13	724869	726370	1501	0	0.2	0	9	0.00251	0	NA	NA
chr15	1177336	1181338	4002	0.2	0	9	0	0.00251	Inf	NA	NA
chr21	792058	794029	1971	0	0.2	0	9	0.00251	0	NA	NA
chr14	997209	1000396	3187	0.2	0	9	0	0.00251	Inf	NA	NA
chr15	429764	430377	613	0.2	0	9	0	0.00251	Inf	NA	NA
chr21	944887	948763	3876	0.2	0	9	0	0.00251	Inf	NA	NA
chr14	1162519	1168489	5970	0.2	0	9	0	0.00251	Inf	NA	NA
chr13	266035	266366	331	0.2	0	9	0	0.00251	Inf	NA	NA
chrY	134441	134550	109	0.2	0	9	0	0.00251	Inf	NA	NA
chr22	486033	487461	1428	0.2	0	9	0	0.00251	Inf	NA	NA
chr21	796195	800410	4215	0.2	0	9	0	0.00251	Inf	NA	NA
chr13	300855	301766	911	0	0.2	0	9	0.00251	0	NA	NA
chr16	180468	180941	473	0.2	0	9	0	0.00251	Inf	NA	NA
chr5	92781	92940	159	0.2	0	9	0	0.00251	Inf	NA	NA	PLEKHG4B				1
chr13	184083	184828	745	0	0.2	0	9	0.00251	0	NA	NA
chr15	359086	362147	3061	0.2	0	9	0	0.00251	Inf	NA	NA
chr21	203741	205187	1446	0.2	0	9	0	0.00251	Inf	NA	NA
chr21	210053	217057	7004	0	0.2	0	9	0.00251	0	NA	NA
chr17	17329	20410	3081	0	0.2	0	9	0.00251	0	NA	NA
chr17	16307	25998	9691	0.2	0	9	0	0.00251	Inf	NA	NA
chr17	22223166	22231328	8162	0.2	0	9	0	0.00251	Inf	NA	NA
chr10	45072692	45073324	632	0.2	0	9	0	0.00251	Inf	NA	NA
chr10	42889943	42891759	1816	0.2	0	9	0	0.00251	Inf	NA	NA
chr1	2222310	2230934	8624	0.2	0	9	0	0.00251	Inf	NA	NA
chr11	61999112	61999881	769	0.2	0	9	0	0.00251	Inf	8e-05	0.0001
chr4	21501527	21502061	534	0.2	0	9	0	0.00251	Inf	0.00127	0.00081	KCNIP4				1
chr10	41791606	41793642	2036	0	0.2	0	9	0.00251	0	NA	NA
chr19	28849377	28851418	2041	0.2	0	9	0	0.00251	Inf	NA	NA
chr17	22229573	22231328	1755	0.2	0	9	0	0.00251	Inf	NA	NA
chr20	32848051	32875307	27256	0.2	0	9	0	0.00251	Inf	NA	NA
chr1	12524812	12554632	29820	0.2	0	9	0	0.00251	Inf	0.38772	0.34086	PRAMEF13	6	3	2	6
chr2	239361714	239361779	65	0.7333	0.4	33	18	0.00268	4.1243	NA	NA	TWIST2				1
chr6	149764855	149764923	68	0.7333	0.4	33	18	0.00268	4.1243	NA	NA
chr10	133721301	133721355	54	0.2667	0.6	12	27	0.00268	0.242466	NA	NA	INPP5A				1
chr4	192853141	192853273	132	0.4	0.7333	18	33	0.00268	0.242466	NA	NA
chr2	130494037	130494274	237	0.4	0.7333	18	33	0.00268	0.242466	0	0
chr19	31277794	31277847	53	0.2667	0.6	12	27	0.00268	0.242466	NA	NA
chr14	29359946	29360011	65	0.6	0.2667	27	12	0.00268	4.1243	NA	NA	PRORP				1
chr20	32194619	32194699	80	0.7333	0.4	33	18	0.00268	4.1243	NA	NA
chr2	90877153	90878170	1017	0.6	0.2667	27	12	0.00268	4.1243	NA	NA
chr11	61050601	61051269	668	0.4	0.7333	18	33	0.00268	0.242466	NA	NA
chr15	64934263	64935204	941	0.6	0.2667	27	12	0.00268	4.1243	0.32511	0.19458	SMAD3				1
chr10	36950800	36951114	314	0.2667	0.6	12	27	0.00268	0.242466	NA	NA
chr19	25344155	25344326	171	0.7333	0.4	33	18	0.00268	4.1243	NA	NA
chr1	151343533	151351297	7764	0.6	0.2667	27	12	0.00268	4.1243	NA	NA	HRNR	1			1
chr20	49654575	49655454	879	0.2667	0.6	12	27	0.00268	0.242466	NA	NA
chr21	15645921	15646050	129	0.4	0.7333	18	33	0.00268	0.242466	NA	NA
chr1	34403164	34404078	914	0.2667	0.6	12	27	0.00268	0.242466	NA	NA
chr12	6188712	6188795	83	0.2667	0.6	12	27	0.00268	0.242466	0.00016	2e-05
chr18	11671852	11673621	1769	0.7333	0.4	33	18	0.00268	4.1243	NA	NA
chr17	1901523	1901732	209	0.6	0.2667	27	12	0.00268	4.1243	NA	NA	RTN4RL1				1
chr22	2104526	2106500	1974	0.6	0.2667	27	12	0.00268	4.1243	NA	NA
chr10	133038192	133038295	103	0.1556	0.4667	7	21	0.00272	0.210569	NA	NA	JAKMIP3				1
chr12	128876645	128876754	109	0.8444	0.5333	38	24	0.00272	4.74903	NA	NA
chr5	107400869	107400959	90	0.1556	0.4667	7	21	0.00272	0.210569	0.00016	0.00014
chr8	95465752	95465836	84	0.5333	0.8444	24	38	0.00272	0.210569	0.34416	0.472
chr21	36086916	36086981	65	0.4667	0.1556	21	7	0.00272	4.74903	0.17453	0.16574	KCNJ6				1
chr20	32401468	32401592	124	0.8444	0.5333	38	24	0.00272	4.74903	NA	NA
chr18	80349033	80349995	962	0.1556	0.4667	7	21	0.00272	0.210569	NA	NA
chr3	75572207	75573573	1366	0.5333	0.8444	24	38	0.00272	0.210569	NA	NA
chr4	21272884	21273003	119	0.4667	0.1556	21	7	0.00272	4.74903	0.2294	0.08973	KCNIP4				1
chr5	25585177	25585389	212	0.4667	0.1556	21	7	0.00272	4.74903	NA	NA
chr7	63654847	63656210	1363	0.4667	0.1556	21	7	0.00272	4.74903	NA	NA
chr22	21535103	21536033	930	0.4667	0.1556	21	7	0.00272	4.74903	NA	NA
chr20	8248935	8249118	183	0.1556	0.4667	7	21	0.00272	0.210569	0.15873	0.22463	PLCB1				1
chr12	16144524	16145683	1159	0.8444	0.5333	38	24	0.00272	4.74903	0.46108	0.45241	SLC15A5				1
chr13	439594	440182	588	0.4667	0.1556	21	7	0.00272	4.74903	NA	NA
chr13	861780	864176	2396	0.4667	0.1556	21	7	0.00272	4.74903	NA	NA
chr8	3928883	3929262	379	0.8444	0.5333	38	24	0.00272	4.74903	NA	NA	CSMD1				1
chr3	154432456	154432534	78	0.6222	0.2889	28	13	0.00283	4.0537	NA	NA
chr3	193567542	193567688	146	0.6222	0.2889	28	13	0.00283	4.0537	0.35374	0.30235
chr14	70567726	70567785	59	0.2889	0.6222	13	28	0.00283	0.246688	NA	NA	ESRRB				1
chr2	111648070	111648259	189	0.2889	0.6222	13	28	0.00283	0.246688	NA	NA
chr15	83683641	83683869	228	0.3778	0.7111	17	32	0.00283	0.246688	0.0099	0.00738
chr20	39920302	39920370	68	0.3778	0.7111	17	32	0.00283	0.246688	NA	NA
chr7	52613482	52613684	202	0.3778	0.7111	17	32	0.00283	0.246688	0.49428	0.55812
chr2	16175568	16175657	89	0.6222	0.2889	28	13	0.00283	4.0537	NA	NA
chr3	154421833	154432323	10490	0.6222	0.2889	28	13	0.00283	4.0537	NA	NA
chr10	41871662	41872680	1018	0.6222	0.2889	28	13	0.00283	4.0537	NA	NA
chr7	60430111	60433404	3293	0.6222	0.2889	28	13	0.00283	4.0537	NA	NA
chr18	16204685	16205703	1018	0.3778	0.7111	17	32	0.00283	0.246688	NA	NA
chr19	4602239	4602322	83	0.2889	0.6222	13	28	0.00283	0.246688	NA	NA
chr15	1143788	1143923	135	0.2889	0.6222	13	28	0.00283	0.246688	NA	NA
chr19	403816	403881	65	0.2889	0.6222	13	28	0.00283	0.246688	NA	NA	SHC2				1
chr13	325299	325467	168	0.6222	0.2889	28	13	0.00283	4.0537	NA	NA
chr6	167663862	167663916	54	0.3556	0.6889	16	31	0.00292	0.249201	NA	NA
chr8	145089559	145089672	113	0.3556	0.6889	16	31	0.00292	0.249201	NA	NA	PLEC				1
chr2	123670001	123670112	111	0.3111	0.6444	14	29	0.00292	0.249201	NA	NA
chr2	91273379	91273480	101	0.6889	0.3556	31	16	0.00292	4.01282	NA	NA
chr12	59981335	59981407	72	0.3556	0.6889	16	31	0.00292	0.249201	NA	NA
chr13	82079950	82080122	172	0.3111	0.6444	14	29	0.00292	0.249201	NA	NA
chr8	143903401	143904234	833	0.6889	0.3556	31	16	0.00292	4.01282	NA	NA
chr10	56393050	56393241	191	0.3111	0.6444	14	29	0.00292	0.249201	NA	NA	PCDH15				1
chr2	30137688	30137746	58	0.3556	0.6889	16	31	0.00292	0.249201	NA	NA
chr15	18006959	18007029	70	0.3111	0.6444	14	29	0.00292	0.249201	NA	NA
chr20	14751848	14751922	74	0.6889	0.3556	31	16	0.00292	4.01282	NA	NA	MACROD2				1
chr19	25839118	25839458	340	0.6889	0.3556	31	16	0.00292	4.01282	NA	NA
chr5	13535392	13535588	196	0.3556	0.6889	16	31	0.00292	0.249201	NA	NA
[truncated: 272,497+ more rows]
[truncated: 62 more columns]

[truncated: 4 more sheets: duplications, insertions, inversions, annotations]
