# Supplementary material for: Population-Specific Structural Variant Landscape in a Puerto Rican Rare Disease Cohort
Source: Research Square preprint supplement (doi:10.21203/rs.3.rs-8544782/v1), 2026-02-24
Supplement: Supplementary file 2 [file 1f53fd21d5c241b3a255444d.docx]

**Supplemental Figure 1: Cohort sequencing coverage and depth.** (**A**) A heatmap of T2T genome coverage across chromosomes by individuals in the cohort. Lower coverages appear darker (blue) than higher coverage (0-100% coverage). (**B**) A boxplot of mean sequencing depths across each chromosome for all 30 probands shows expected dips at chr9 and chrY.

**Supplemental Figure 2: Mean SV count differences between ancestries at specific chromosomal regions.** Dot plots for each SV type count and chromosome. Each plot shows chromosome regions (telomeric p arm, p arm, pericentromeric p arm, centromere, telomeric q arm, q arm, pericentromeric q arm) and mean count differences at those regions between ancestries (negative count and blue color = EUR, positive count and red color = PUR).

**Supplemental Figure 3: Mean SNV count differences between ancestries at specific chromosomal regions.** Dot plots for SNV counts and chromosome. Each plot shows chromosome regions (telomeric p arm, p arm, pericentromeric p arm, centromere, telomeric q arm, q arm, pericentromeric q arm) and mean count differences at those regions between ancestries (negative count and blue color = EUR, positive count and red color = PUR).

**Supplemental Figure 4: Log2 SNV ratio differences between ancestries at specific chromosomal regions.** Heatmap of SNV log2 ratio differences at chromosomal regions (telomeric p arm, p arm, pericentromeric p arm, centromere, telomeric q arm, q arm, pericentromeric q arm; negative ratios and blue color = EUR, positive ratios and red color = PUR).


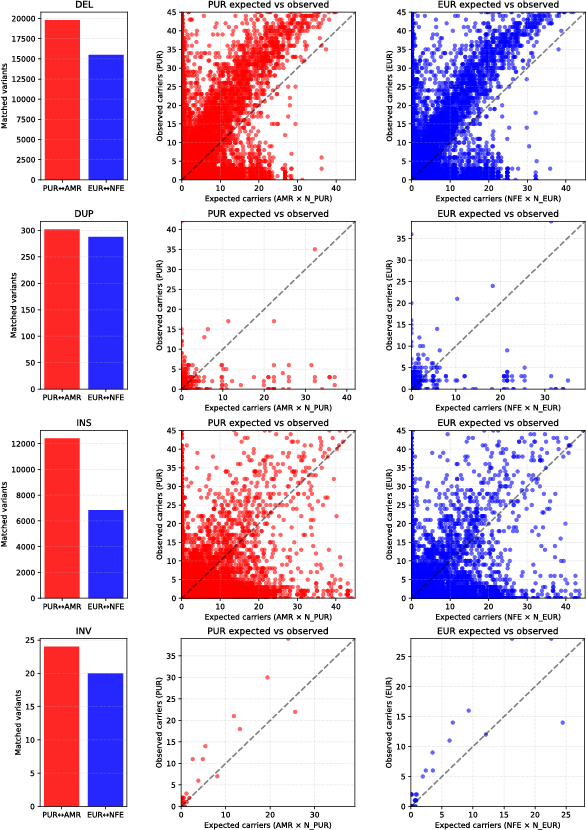


**Supplemental Figure 5: Structural variants matched in gnomAD.** (**Left**) Bar plots show the number of matched variants between PUR and AMR (gnomAD); EUR and NFE (gnomAD) (**Right**) Dot plots show the correlation between the expected carrier count (gnomAD x N cohort) of a matched variant and the observed count in our cohort (N=45).


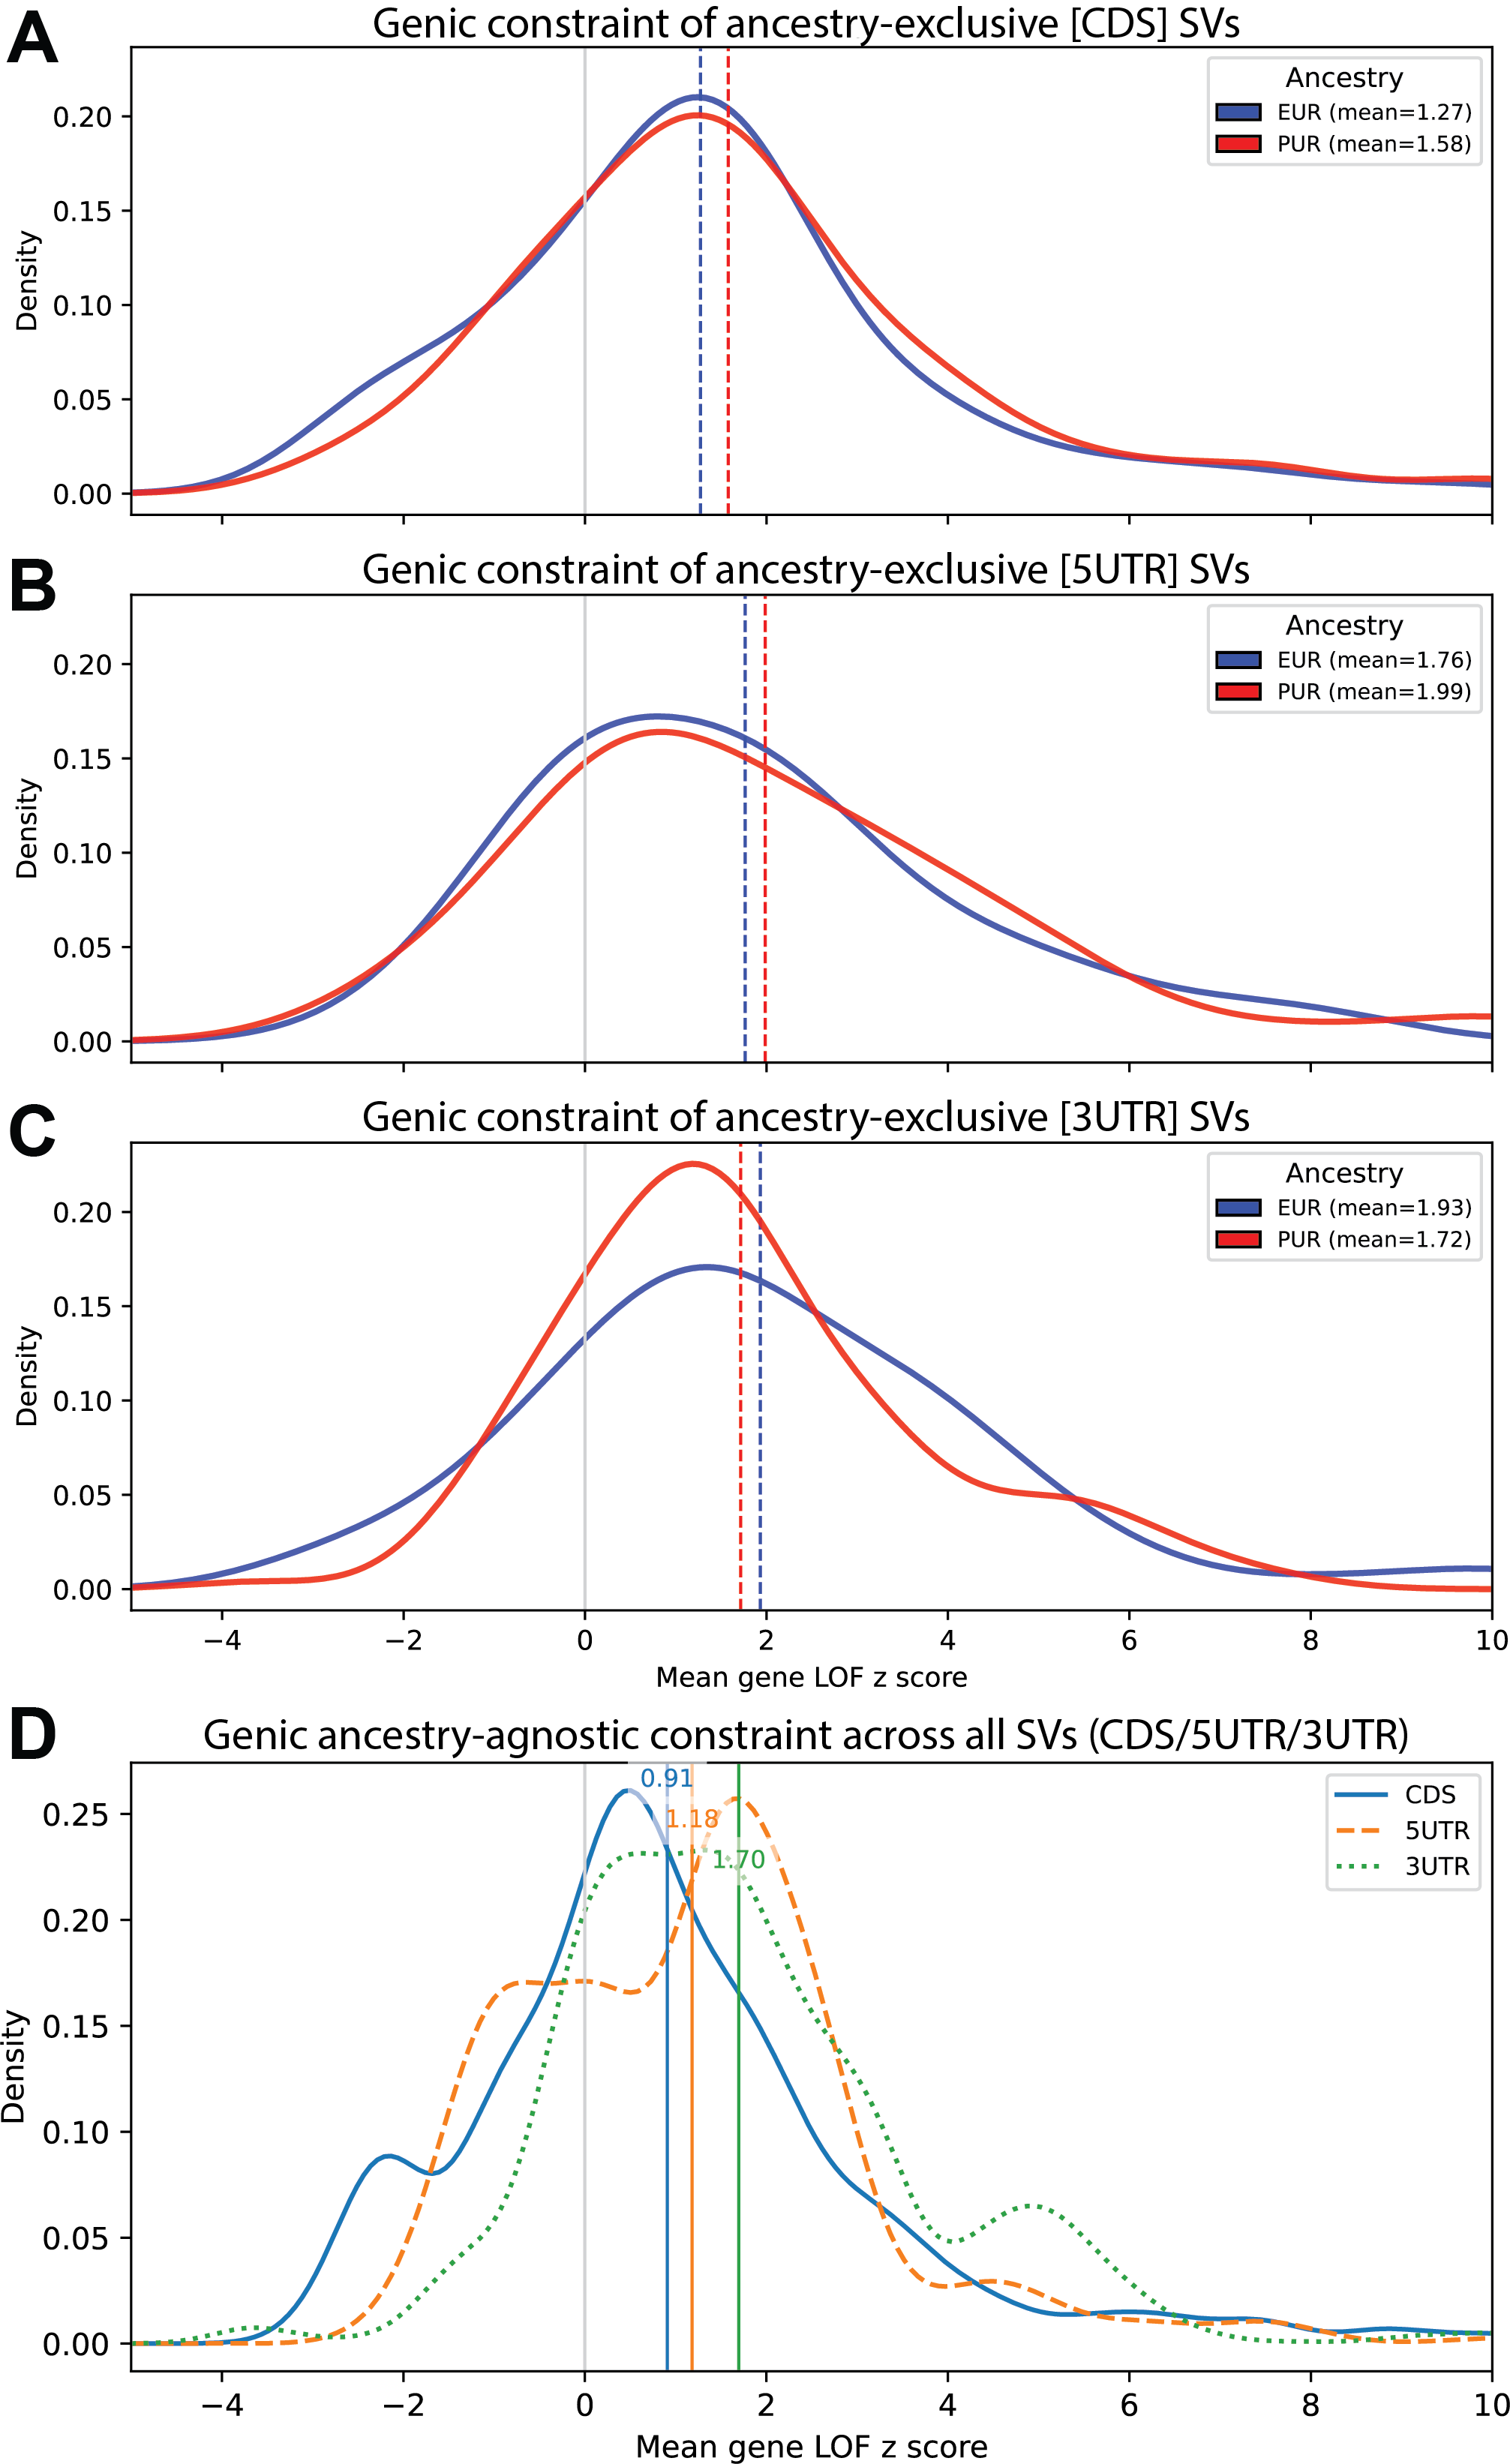


**Supplemental Figure 6: Genic constraint of functional structural variant intersects.**  SVs were given a mean LoF constraint z-score depending on the genes they intersect. (**A**-**C**) Plots display the density of z-scores across the x-axis with each plot representing a different gene region where SVs intersect with CDS (**A**), 5’ UTR (**B**), or 3’ UTR (**C**). The lines display the density of ancestry-exclusive SVs, with blue representing EUR and red PUR. Dotted lines display the mean z-score for each ancestry’s SVs. (**D**) A density plot for all functional region SVs, regardless of ancestry, with separate lines for SVs in different genic regions (blue=CDS, orange=5’ UTR, green=3' UTR).

**Supplemental Figure 7: Founder coding deletion of HBA2 in PUR3P.** Image from integrated genomics viewer (IGV) of a maternally inherited HBA2 coding deletion at chr16:166,741–170,548. The deletion represents a 3.8 kb heterozygous founder variant more frequent in Puerto Ricans with anemia.

**Supplemental Figure 8: Polygenic disruption of transcriptional regulation of ANKRD11 and EHMT1, and GABAergic signaling of GABRB3 in PUR3P**. Image from integrated genomics viewer (IGV) showing (**A**) two 62 bp maternally inherited ANKRD11 3’ UTR deletions (chr16:95,379,667–95,379,728 and chr16:95,379,980–95,380,043), (**B**) a paternal 86 bp EHMT1 3’ UTR deletion at chr9:150,131,808–150,131,894, and (**C**) a paternal 779 bp GABRB3 5’ UTR deletion at chr15:24,457,716–24,458,495.

**Supplemental Figure 9: Biallelic CHMP1A disruption in PUR6P.** Image from integrated genomics viewer (IGV) showing a maternal 1.89 kb CHMP1A deletion spanning CDS and 3’ UTR (chr16:95,731,319–95,733,209) and a paternal 135 bp 3’UTR deletion (chr16:95,733,580–95,733,715).

**Supplemental Figure 10: Regulatory deletion of 5’ UTR in FGF12 shown in PUR5P.** Image from integrated genomics viewer (IGV) showing a paternal 2.15 kb FGF12 5’ UTR deletion at chr3:195,368,031–195,370,181.

**Supplemental Figure 11: Complex interplay of SVs and SNVs may contribute to disease phenotypes in PUR15P.** Image from integrated genomics viewer (IGV) showing a (A) small 59 bp paternally inherited KCNQ2 3’ UTR deletion at chr20:65,209,664–65,209,723 and a (**B**) paternal 1.1 kb GTF2I coding deletion at chr7:75,944,926–75,946,021.
